# Supplementary material for: The System’s Point of View applied to Dielectrophoresis in Plate Capacitor and Pointed-versus-Pointed Electrode Chambers
Source: Preprints.org preprint supplement (doi:10.20944/preprints202302.0190.v1), 2023-02-10
Supplement: Supplementary file 1 [file Table 1.xlsx]

## Sheet: Plain vs. Plain_1-in-0.1_conduc
Basic Resistance	Basic Conductance	Mean Resistance	Mean Conductance	k		a_X	a_y	a_Resistance in Route	a_Conductance along trajectory	a_Trajectory length	a_Delta Cond	a_Step width along trajectory	a_Mid-distance	a_norm. Force (Delta Cond./basic/diSTep)		b_X	b_Y	b_Resistance in Routh	b_Conductance along trajectory	b_Trajectory length	b-Delta Cond	b_Step width along trajectory	b_Mid-distance	b_norm. Force (Delta Cond./basic/diSTep)		c_X	c_Y	c_Resistance in Routh	c_Conductance along trajectory	c_Trajectory length	c_Delta Cond	c_Step width along trajectory	c_Mid-distance	c_norm. Force (Delta Cond./basic/diSTep)		d_X	d_Y	d_Resistance in Routh	d_Conductance along trajectory	d_Trajectory length	d_Delta Cond	d_Step width along trajectory	d_Mid-distance	d_norm. Force (Delta Cond./basic/diSTep)		e_X	e_Y	e_Resistance in Routh	e_Conductance along trajectory
10	0.0999999	9.49767	0.10529	0.999999		-0.251256	0.40201	9.55793	0.104625	0	5.07079e-06	0.000460335	0.000230167	0.110154		0	0.40201	9.56851	0.104509	0	5.00421e-06	0.00045683	0.000228415	0.109542		-0.40201	0.40201	9.46074	0.1057	0	5.38122e-06	0.00045683	0.000228415	0.117795		0.0100503	0.40201	9.5685	0.10451	0	5.00431e-06	0.000456831	0.000228415	0.109544		-0.0100503	0	9.50065	0.105256
						-0.251313	0.401553	9.55747	0.10463	0.000460335	5.07079e-06	0.000460356	0.000690513	0.110149		0	0.401553	9.56806	0.104514	0.00045683	5.00421e-06	0.00045683	0.000685244	0.109542		-0.40201	0.401553	9.46026	0.105705	0.00045683	5.38122e-06	0.00045683	0.000685244	0.117795		0.0100513	0.401553	9.56804	0.104515	0.000456831	5.00431e-06	0.000456831	0.000685246	0.109544		-0.0105071	0	9.50065	0.105256
						-0.25137	0.401096	9.557	0.104635	0.000920691	5.07103e-06	0.000460377	0.00115088	0.110149		0	0.401096	9.5676	0.104519	0.000913659	5.00421e-06	0.00045683	0.00114207	0.109542		-0.40201	0.401096	9.45978	0.105711	0.000913659	5.38122e-06	0.00045683	0.00114207	0.117795		0.0100523	0.401096	9.56759	0.10452	0.000913661	5.00431e-06	0.000456831	0.00114208	0.109544		-0.0109639	0	9.50065	0.105256
						-0.251427	0.40064	9.55654	0.10464	0.00138107	5.07127e-06	0.000460399	0.00161127	0.11015		0	0.40064	9.56714	0.104524	0.00137049	5.00421e-06	0.00045683	0.0015989	0.109542		-0.40201	0.40064	9.4593	0.105716	0.00137049	5.38122e-06	0.00045683	0.0015989	0.117795		0.0100533	0.40064	9.56713	0.104525	0.00137049	5.00431e-06	0.000456831	0.00159891	0.109544		-0.0114207	0	9.50065	0.105256
						-0.251484	0.400183	9.55608	0.104645	0.00184147	5.07151e-06	0.00046042	0.00207168	0.11015		0	0.400183	9.56668	0.104529	0.00182732	5.00421e-06	0.00045683	0.00205573	0.109542		-0.40201	0.400183	9.45882	0.105721	0.00182732	5.38122e-06	0.00045683	0.00205573	0.117795		0.0100544	0.400183	9.56667	0.10453	0.00182732	5.00431e-06	0.000456831	0.00205574	0.109544		-0.0118776	0	9.50065	0.105256
						-0.251542	0.399726	9.55561	0.104651	0.00230189	5.07176e-06	0.000460442	0.00253211	0.11015		0	0.399726	9.56622	0.104534	0.00228415	5.00421e-06	0.00045683	0.00251256	0.109542		-0.40201	0.399726	9.45833	0.105727	0.00228415	5.38122e-06	0.00045683	0.00251256	0.117795		0.0100554	0.399726	9.56621	0.104535	0.00228415	5.00431e-06	0.000456831	0.00251257	0.109544		-0.0123344	0	9.50064	0.105256
						-0.251599	0.399269	9.55515	0.104656	0.00276233	5.072e-06	0.000460464	0.00299256	0.11015		0	0.399269	9.56577	0.104539	0.00274098	5.00421e-06	0.00045683	0.00296939	0.109542		-0.40201	0.399269	9.45785	0.105732	0.00274098	5.38122e-06	0.00045683	0.00296939	0.117795		0.0100564	0.399269	9.56575	0.10454	0.00274098	5.00431e-06	0.000456831	0.0029694	0.109544		-0.0127912	0	9.50064	0.105256
						-0.251657	0.398812	9.55469	0.104661	0.00322279	5.07225e-06	0.000460487	0.00345304	0.11015		0	0.398812	9.56531	0.104544	0.00319781	5.00421e-06	0.00045683	0.00342622	0.109542		-0.40201	0.398812	9.45737	0.105738	0.00319781	5.38122e-06	0.00045683	0.00342622	0.117795		0.0100575	0.398812	9.5653	0.104545	0.00319782	5.00431e-06	0.000456831	0.00342623	0.109544		-0.0132481	0	9.50064	0.105256
						-0.251715	0.398355	9.55422	0.104666	0.00368328	5.0725e-06	0.000460509	0.00391354	0.11015		0	0.398355	9.56485	0.104549	0.00365464	5.00421e-06	0.00045683	0.00388305	0.109542		-0.40201	0.398355	9.45689	0.105743	0.00365464	5.38122e-06	0.00045683	0.00388305	0.117795		0.0100585	0.398355	9.56484	0.10455	0.00365465	5.00431e-06	0.000456831	0.00388306	0.109544		-0.0137049	0	9.50064	0.105256
						-0.251773	0.397899	9.55376	0.104671	0.00414379	5.07147e-06	0.000460532	0.00437406	0.110122		0	0.397899	9.56439	0.104554	0.00411147	5.00421e-06	0.00045683	0.00433988	0.109542		-0.40201	0.397899	9.45641	0.105748	0.00411147	5.38122e-06	0.00045683	0.00433988	0.117795		0.0100595	0.397899	9.56438	0.104555	0.00411148	5.00431e-06	0.000456831	0.00433989	0.109544		-0.0141617	0	9.50064	0.105256
						-0.251831	0.397442	9.5533	0.104676	0.00460432	5.06743e-06	0.000460555	0.0048346	0.110029		0	0.397442	9.56393	0.104559	0.0045683	5.00421e-06	0.00045683	0.00479671	0.109542		-0.40201	0.397442	9.45593	0.105754	0.0045683	5.38122e-06	0.00045683	0.00479671	0.117795		0.0100606	0.397442	9.56392	0.10456	0.00456831	5.00431e-06	0.000456831	0.00479672	0.109544		-0.0146185	0	9.50064	0.105256
						-0.25189	0.396985	9.55284	0.104681	0.00506488	4.73967e-06	0.000460578	0.00529517	0.102907		0	0.396985	9.56348	0.104564	0.00502513	4.69608e-06	0.00045683	0.00525354	0.102797		-0.40201	0.396985	9.45545	0.105759	0.00502513	5.16488e-06	0.00045683	0.00525354	0.113059		0.0100616	0.396985	9.56347	0.104565	0.00502514	4.69615e-06	0.000456831	0.00525355	0.102798		-0.0150754	0	9.50064	0.105256
						-0.251948	0.396528	9.5524	0.104686	0.00552546	4.74016e-06	0.000460624	0.00575577	0.102907		0	0.396528	9.56305	0.104569	0.00548196	4.69608e-06	0.00045683	0.00571037	0.102797		-0.40201	0.396528	9.45498	0.105764	0.00548196	5.16488e-06	0.00045683	0.00571037	0.113059		0.0100627	0.396528	9.56304	0.104569	0.00548197	4.69615e-06	0.000456831	0.00571038	0.102798		-0.0155322	0	9.50064	0.105256
						-0.252007	0.396071	9.55197	0.10469	0.00598608	4.74066e-06	0.00046067	0.00621641	0.102908		0	0.396071	9.56262	0.104574	0.00593878	4.69608e-06	0.00045683	0.0061672	0.102797		-0.40201	0.396071	9.45452	0.105769	0.00593878	5.16488e-06	0.00045683	0.0061672	0.113059		0.0100637	0.396071	9.56261	0.104574	0.0059388	4.69615e-06	0.000456831	0.00616722	0.102798		-0.015989	0	9.50064	0.105256
						-0.252067	0.395614	9.55154	0.104695	0.00644675	4.74117e-06	0.000460717	0.00667711	0.102908		0	0.395614	9.56219	0.104579	0.00639561	4.69608e-06	0.00045683	0.00662403	0.102797		-0.40201	0.395614	9.45406	0.105775	0.00639561	5.16488e-06	0.00045683	0.00662403	0.113059		0.0100648	0.395614	9.56218	0.104579	0.00639563	4.69615e-06	0.000456831	0.00662405	0.102798		-0.0164459	0	9.50064	0.105256
						-0.252126	0.395158	9.55111	0.1047	0.00690747	4.74168e-06	0.000460766	0.00713785	0.102909		0	0.395158	9.56176	0.104583	0.00685244	4.69608e-06	0.00045683	0.00708086	0.102797		-0.40201	0.395158	9.4536	0.10578	0.00685244	5.16488e-06	0.00045683	0.00708086	0.113059		0.0100659	0.395158	9.56175	0.104583	0.00685246	4.69615e-06	0.000456831	0.00708088	0.102798		-0.0169027	0	9.50064	0.105256
						-0.252186	0.394701	9.55067	0.104705	0.00736823	4.7422e-06	0.000460815	0.00759864	0.102909		0	0.394701	9.56133	0.104588	0.00730927	4.69608e-06	0.00045683	0.00753769	0.102797		-0.40201	0.394701	9.45314	0.105785	0.00730927	5.16488e-06	0.00045683	0.00753769	0.113059		0.010067	0.394701	9.56132	0.104588	0.00730929	4.69615e-06	0.000456831	0.00753771	0.102798		-0.0173595	0	9.50064	0.105256
						-0.252247	0.394244	9.55024	0.104709	0.00782905	4.74273e-06	0.000460865	0.00805948	0.102909		0	0.394244	9.5609	0.104593	0.0077661	4.69608e-06	0.00045683	0.00799452	0.102797		-0.40201	0.394244	9.45268	0.10579	0.0077661	5.16488e-06	0.00045683	0.00799452	0.113059		0.010068	0.394244	9.56089	0.104593	0.00776612	4.69615e-06	0.000456831	0.00799454	0.102798		-0.0178164	0	9.50064	0.105256
						-0.252308	0.393787	9.54981	0.104714	0.00828991	4.74326e-06	0.000460916	0.00852037	0.102909		0	0.393787	9.56047	0.104597	0.00822293	4.69608e-06	0.00045683	0.00845135	0.102797		-0.40201	0.393787	9.45222	0.105795	0.00822293	5.16488e-06	0.00045683	0.00845135	0.113059		0.0100691	0.393787	9.56046	0.104597	0.00822295	4.69615e-06	0.000456831	0.00845137	0.102798		-0.0182732	0	9.50064	0.105256
						-0.252369	0.39333	9.54938	0.104719	0.00875083	4.74025e-06	0.000460968	0.00898131	0.102832		0	0.39333	9.56004	0.104602	0.00867976	4.69608e-06	0.00045683	0.00890818	0.102797		-0.40201	0.39333	9.45175	0.1058	0.00867976	5.16488e-06	0.00045683	0.00890818	0.113059		0.0100702	0.39333	9.56003	0.104602	0.00867979	4.69615e-06	0.000456831	0.0089082	0.102798		-0.01873	0	9.50064	0.105256
						-0.252431	0.392873	9.54894	0.104724	0.00921179	4.73728e-06	0.000461021	0.00944231	0.102756		0	0.392873	9.55961	0.104607	0.00913659	4.69608e-06	0.00045683	0.00936501	0.102797		-0.40201	0.392873	9.45129	0.105806	0.00913659	5.16488e-06	0.00045683	0.00936501	0.113059		0.0100713	0.392873	9.5596	0.104607	0.00913662	4.69615e-06	0.000456831	0.00936503	0.102798		-0.0191868	0	9.50063	0.105256
						-0.252493	0.392417	9.54851	0.104728	0.00967282	4.73783e-06	0.000461075	0.00990335	0.102756		0	0.392417	9.55918	0.104611	0.00959342	4.69608e-06	0.00045683	0.00982184	0.102797		-0.40201	0.392417	9.45083	0.105811	0.00959342	4.96998e-06	0.00045683	0.00982184	0.108793		0.0100725	0.392417	9.55917	0.104612	0.00959345	4.69615e-06	0.000456831	0.00982186	0.102798		-0.0196437	0	9.50063	0.105256
						-0.252555	0.39196	9.54808	0.104733	0.0101339	4.41469e-06	0.000461131	0.0103645	0.0957362		0	0.39196	9.55875	0.104616	0.0100503	4.3899e-06	0.00045683	0.0102787	0.096095		-0.40201	0.39196	9.45039	0.105816	0.0100503	4.96998e-06	0.00045683	0.0102787	0.108793		0.0100736	0.39196	9.55874	0.104616	0.0100503	4.39012e-06	0.000456831	0.0102787	0.0960995		-0.0201005	0	9.50063	0.105256
						-0.252618	0.391503	9.54768	0.104738	0.010595	4.41523e-06	0.000461185	0.0108256	0.0957367		0	0.391503	9.55835	0.104621	0.0105071	4.3899e-06	0.00045683	0.0107355	0.096095		-0.40201	0.391503	9.44994	0.105821	0.0105071	4.96998e-06	0.00045683	0.0107355	0.108793		0.0100747	0.391503	9.55834	0.104621	0.0105071	4.39013e-06	0.000456831	0.0107355	0.0960997		-0.0205573	0	9.50063	0.105256
						-0.252681	0.391046	9.54727	0.104742	0.0110562	4.41578e-06	0.00046124	0.0112868	0.0957372		0	0.391046	9.55795	0.104625	0.0109639	4.3899e-06	0.00045683	0.0111923	0.096095		-0.40201	0.391046	9.4495	0.105826	0.0109639	4.96998e-06	0.00045683	0.0111923	0.108793		0.0100758	0.391046	9.55794	0.104625	0.0109639	4.39013e-06	0.000456831	0.0111924	0.0960997		-0.0210142	0	9.50063	0.105256
						-0.252745	0.390589	9.54687	0.104746	0.0115174	4.41634e-06	0.000461297	0.0117481	0.0957376		0	0.390589	9.55755	0.104629	0.0114207	4.3899e-06	0.00045683	0.0116492	0.096095		-0.40201	0.390589	9.44906	0.105831	0.0114207	4.96998e-06	0.00045683	0.0116492	0.108793		0.010077	0.390589	9.55754	0.104629	0.0114208	4.39013e-06	0.000456831	0.0116492	0.0960997		-0.021471	0	9.50063	0.105256
						-0.252809	0.390132	9.54647	0.104751	0.0119787	4.41691e-06	0.000461354	0.0122094	0.0957379		0	0.390132	9.55715	0.104634	0.0118776	4.3899e-06	0.00045683	0.012106	0.096095		-0.40201	0.390132	9.44861	0.105836	0.0118776	4.96998e-06	0.00045683	0.012106	0.108793		0.0100781	0.390132	9.55714	0.104634	0.0118776	4.39013e-06	0.000456831	0.012106	0.0960997		-0.0219278	0	9.50063	0.105256
						-0.252873	0.389676	9.54607	0.104755	0.0124401	4.41748e-06	0.000461413	0.0126708	0.0957382		0	0.389676	9.55675	0.104638	0.0123344	4.3899e-06	0.00045683	0.0125628	0.096095		-0.40201	0.389676	9.44817	0.105841	0.0123344	4.96998e-06	0.00045683	0.0125628	0.108793		0.0100793	0.389676	9.55674	0.104638	0.0123344	4.39013e-06	0.000456831	0.0125628	0.0960997		-0.0223847	0	9.50063	0.105256
						-0.252938	0.389219	9.54566	0.10476	0.0129015	4.41807e-06	0.000461473	0.0131322	0.0957383		0	0.389219	9.55635	0.104642	0.0127912	4.3899e-06	0.00045683	0.0130196	0.096095		-0.40201	0.389219	9.44772	0.105846	0.0127912	4.96998e-06	0.00045683	0.0130196	0.108793		0.0100805	0.389219	9.55634	0.104643	0.0127913	4.39013e-06	0.000456831	0.0130197	0.0960997		-0.0228415	0	9.50063	0.105256
						-0.253003	0.388762	9.54526	0.104764	0.013363	4.41154e-06	0.000461535	0.0135938	0.0955841		0	0.388762	9.55595	0.104647	0.0132481	4.3899e-06	0.00045683	0.0134765	0.096095		-0.40201	0.388762	9.44728	0.105851	0.0132481	4.96998e-06	0.00045683	0.0134765	0.108793		0.0100816	0.388762	9.55594	0.104647	0.0132481	4.39013e-06	0.000456831	0.0134765	0.0960997		-0.0232983	0	9.50063	0.105256
						-0.253069	0.388305	9.54486	0.104768	0.0138245	4.41084e-06	0.000461597	0.0140553	0.0955561		0	0.388305	9.55555	0.104651	0.0137049	4.3899e-06	0.00045683	0.0139333	0.096095		-0.40201	0.388305	9.44684	0.105856	0.0137049	4.96998e-06	0.00045683	0.0139333	0.108793		0.0100828	0.388305	9.55554	0.104651	0.0137049	4.39013e-06	0.000456831	0.0139333	0.0960997		-0.0237551	0	9.50063	0.105256
						-0.253135	0.387848	9.54446	0.104773	0.0142861	4.41144e-06	0.000461661	0.0145169	0.0955558		0	0.387848	9.55515	0.104656	0.0141617	4.3899e-06	0.00045683	0.0143901	0.096095		-0.40201	0.387848	9.44639	0.105861	0.0141617	4.96998e-06	0.00045683	0.0143901	0.108793		0.010084	0.387848	9.55513	0.104656	0.0141618	4.39013e-06	0.000456831	0.0143902	0.0960997		-0.024212	0	9.50062	0.105256
						-0.253202	0.387392	9.54406	0.104777	0.0147478	4.41205e-06	0.000461726	0.0149786	0.0955556		0	0.387392	9.55475	0.10466	0.0146185	4.3899e-06	0.00045683	0.014847	0.096095		-0.40201	0.387392	9.44595	0.105865	0.0146185	4.96998e-06	0.00045683	0.014847	0.108793		0.0100852	0.387392	9.55473	0.10466	0.0146186	4.39013e-06	0.000456831	0.014847	0.0960997		-0.0246688	0	9.50062	0.105256
						-0.253269	0.386935	9.54365	0.104782	0.0152095	4.09592e-06	0.000461793	0.0154404	0.0886959		0	0.386935	9.55434	0.104664	0.0150754	4.08748e-06	0.00045683	0.0153038	0.0894749		-0.40201	0.386935	9.44551	0.10587	0.0150754	4.744e-06	0.00045683	0.0153038	0.103846		0.0100864	0.386935	9.55433	0.104665	0.0150754	4.0875e-06	0.000456831	0.0153038	0.0894751		-0.0251256	0	9.50062	0.105256
						-0.253337	0.386478	9.54328	0.104786	0.0156713	4.09652e-06	0.000461858	0.0159022	0.0886964		0	0.386478	9.55397	0.104669	0.0155322	4.08748e-06	0.00045683	0.0157606	0.0894749		-0.40201	0.386478	9.44508	0.105875	0.0155322	4.744e-06	0.00045683	0.0157606	0.103846		0.0100876	0.386478	9.55396	0.104669	0.0155323	4.0875e-06	0.000456831	0.0157607	0.0894751		-0.0255825	0	9.50062	0.105256
						-0.253405	0.386021	9.54291	0.10479	0.0161332	4.09713e-06	0.000461925	0.0163641	0.0886969		0	0.386021	9.5536	0.104673	0.015989	4.08748e-06	0.00045683	0.0162175	0.0894749		-0.40201	0.386021	9.44466	0.10588	0.015989	4.744e-06	0.00045683	0.0162175	0.103846		0.0100888	0.386021	9.55359	0.104673	0.0159891	4.0875e-06	0.000456831	0.0162175	0.0894751		-0.0260393	0	9.50062	0.105256
						-0.253473	0.385564	9.54254	0.104794	0.0165951	4.09775e-06	0.000461993	0.0168261	0.0886972		0	0.385564	9.55323	0.104677	0.0164459	4.08748e-06	0.00045683	0.0166743	0.0894749		-0.40201	0.385564	9.44424	0.105885	0.0164459	4.744e-06	0.00045683	0.0166743	0.103846		0.0100901	0.385564	9.55321	0.104677	0.0164459	4.0875e-06	0.000456831	0.0166743	0.0894751		-0.0264961	0	9.50062	0.105256
						-0.253542	0.385107	9.54216	0.104798	0.0170571	4.09838e-06	0.000462062	0.0172881	0.0886975		0	0.385107	9.55285	0.104681	0.0169027	4.08748e-06	0.00045683	0.0171311	0.0894749		-0.40201	0.385107	9.44381	0.105889	0.0169027	4.744e-06	0.00045683	0.0171311	0.103846		0.0100913	0.385107	9.55284	0.104681	0.0169027	4.0875e-06	0.000456831	0.0171312	0.0894751		-0.0269529	0	9.50062	0.105256
						-0.253611	0.384651	9.54179	0.104802	0.0175191	4.09646e-06	0.000462133	0.0177502	0.0886423		0	0.384651	9.55248	0.104685	0.0173595	4.08748e-06	0.00045683	0.0175879	0.0894749		-0.40201	0.384651	9.44339	0.105894	0.0173595	4.744e-06	0.00045683	0.0175879	0.103846		0.0100925	0.384651	9.55247	0.104685	0.0173596	4.0875e-06	0.000456831	0.017588	0.0894751		-0.0274098	0	9.50062	0.105256
						-0.253681	0.384194	9.54142	0.104806	0.0179813	4.09006e-06	0.000462206	0.0182124	0.0884901		0	0.384194	9.55211	0.104689	0.0178164	4.08748e-06	0.00045683	0.0180448	0.0894749		-0.40201	0.384194	9.44297	0.105899	0.0178164	4.744e-06	0.00045683	0.0180448	0.103846		0.0100938	0.384194	9.55209	0.104689	0.0178164	4.0875e-06	0.000456831	0.0180448	0.0894751		-0.0278666	0	9.50062	0.105256
						-0.253751	0.383737	9.54104	0.10481	0.0184435	4.09071e-06	0.00046228	0.0186746	0.0884899		0	0.383737	9.55173	0.104693	0.0182732	4.08748e-06	0.00045683	0.0185016	0.0894749		-0.40201	0.383737	9.44255	0.105904	0.0182732	4.744e-06	0.00045683	0.0185016	0.103846		0.0100951	0.383737	9.55172	0.104693	0.0182732	4.0875e-06	0.000456831	0.0185017	0.0894751		-0.0283234	0	9.50061	0.105256
						-0.253822	0.38328	9.54067	0.104814	0.0189058	4.09137e-06	0.000462356	0.0191369	0.0884896		0	0.38328	9.55136	0.104697	0.01873	4.08748e-06	0.00045683	0.0189584	0.0894749		-0.40201	0.38328	9.44212	0.105908	0.01873	4.744e-06	0.00045683	0.0189584	0.103846		0.0100963	0.38328	9.55135	0.104697	0.0187301	4.0875e-06	0.000456831	0.0189585	0.0894751		-0.0287803	0	9.50061	0.105256
						-0.253893	0.382823	9.5403	0.104819	0.0193681	4.09204e-06	0.000462433	0.0195993	0.0884893		0	0.382823	9.55099	0.104701	0.0191868	4.08748e-06	0.00045683	0.0194153	0.0894749		-0.40201	0.382823	9.4417	0.105913	0.0191868	4.744e-06	0.00045683	0.0194153	0.103846		0.0100976	0.382823	9.55098	0.104701	0.0191869	4.0875e-06	0.000456831	0.0194153	0.0894751		-0.0292371	0	9.50061	0.105256
						-0.253965	0.382366	9.53993	0.104823	0.0198305	4.09272e-06	0.000462512	0.0200618	0.0884888		0	0.382366	9.55061	0.104705	0.0196437	4.08748e-06	0.00045683	0.0198721	0.0894749		-0.40201	0.382366	9.44128	0.105918	0.0196437	4.744e-06	0.00045683	0.0198721	0.103846		0.0100989	0.382366	9.5506	0.104705	0.0196437	4.0875e-06	0.000456831	0.0198721	0.0894751		-0.0296939	0	9.50061	0.105256
						-0.254037	0.38191	9.53955	0.104827	0.0202931	3.78605e-06	0.000462593	0.0205244	0.0818441		0	0.38191	9.55024	0.104709	0.0201005	3.79188e-06	0.00045683	0.0203289	0.0830042		-0.40201	0.38191	9.44085	0.105923	0.0201005	4.54129e-06	0.00045683	0.0203289	0.0994088		0.0101002	0.38191	9.55023	0.10471	0.0201006	3.79187e-06	0.000456831	0.020329	0.0830038		-0.0301508	0	9.50061	0.105256
						-0.25411	0.381453	9.53921	0.10483	0.0207557	3.78671e-06	0.000462672	0.020987	0.0818445		0	0.381453	9.5499	0.104713	0.0205573	3.79188e-06	0.00045683	0.0207857	0.0830042		-0.40201	0.381453	9.44045	0.105927	0.0205573	4.54129e-06	0.00045683	0.0207857	0.0994088		0.0101015	0.381453	9.54988	0.104713	0.0205574	3.79188e-06	0.000456831	0.0207858	0.0830039		-0.0306076	0	9.50061	0.105256
						-0.254183	0.380996	9.53887	0.104834	0.0212183	3.78739e-06	0.000462752	0.0214497	0.0818449		0	0.380996	9.54955	0.104717	0.0210142	3.79188e-06	0.00045683	0.0212426	0.0830042		-0.40201	0.380996	9.44004	0.105932	0.0210142	4.54129e-06	0.00045683	0.0212426	0.0994088		0.0101028	0.380996	9.54954	0.104717	0.0210142	3.79188e-06	0.000456832	0.0212426	0.0830039		-0.0310644	0	9.50061	0.105256
						-0.254257	0.380539	9.53852	0.104838	0.0216811	3.78807e-06	0.000462834	0.0219125	0.0818452		0	0.380539	9.5492	0.104721	0.021471	3.79188e-06	0.00045683	0.0216994	0.0830042		-0.40201	0.380539	9.43964	0.105936	0.021471	4.54129e-06	0.00045683	0.0216994	0.0994088		0.0101041	0.380539	9.54919	0.104721	0.0214711	3.79188e-06	0.000456832	0.0216995	0.0830039		-0.0315212	0	9.50061	0.105256
						-0.254332	0.380082	9.53818	0.104842	0.0221439	3.78061e-06	0.000462918	0.0223754	0.0816692		0	0.380082	9.54886	0.104725	0.0219278	3.79188e-06	0.00045683	0.0221562	0.0830042		-0.40201	0.380082	9.43923	0.105941	0.0219278	4.54129e-06	0.00045683	0.0221562	0.0994088		0.0101055	0.380082	9.54885	0.104725	0.0219279	3.79188e-06	0.000456832	0.0221563	0.0830039		-0.0319781	0	9.5006	0.105256
						-0.254406	0.379625	9.53783	0.104846	0.0226068	3.77886e-06	0.000463003	0.0228383	0.0816163		0	0.379625	9.54851	0.104728	0.0223847	3.79188e-06	0.00045683	0.0226131	0.0830042		-0.40201	0.379625	9.43883	0.105945	0.0223847	4.54129e-06	0.00045683	0.0226131	0.0994088		0.0101068	0.379625	9.5485	0.104728	0.0223847	3.79188e-06	0.000456832	0.0226131	0.0830039		-0.0324349	0	9.5006	0.105256
						-0.254482	0.379169	9.53749	0.104849	0.0230698	3.77957e-06	0.000463091	0.0233014	0.0816161		0	0.379169	9.54817	0.104732	0.0228415	3.79188e-06	0.00045683	0.0230699	0.0830042		-0.40201	0.379169	9.43843	0.10595	0.0228415	4.54129e-06	0.00045683	0.0230699	0.0994088		0.0101082	0.379169	9.54816	0.104732	0.0228416	3.79188e-06	0.000456832	0.02307	0.0830039		-0.0328917	0	9.5006	0.105256
						-0.254558	0.378712	9.53714	0.104853	0.0235329	3.78028e-06	0.00046318	0.0237645	0.0816158		0	0.378712	9.54782	0.104736	0.0232983	3.79188e-06	0.00045683	0.0235267	0.0830042		-0.40201	0.378712	9.43802	0.105954	0.0232983	4.54129e-06	0.00045683	0.0235267	0.0994088		0.0101095	0.378712	9.54781	0.104736	0.0232984	3.79188e-06	0.000456832	0.0235268	0.0830039		-0.0333486	0	9.5006	0.105257
						-0.254634	0.378255	9.5368	0.104857	0.0239961	3.78101e-06	0.000463272	0.0242277	0.0816153		0	0.378255	9.54748	0.10474	0.0237551	3.79188e-06	0.00045683	0.0239836	0.0830042		-0.40201	0.378255	9.43762	0.105959	0.0237551	4.54129e-06	0.00045683	0.0239836	0.0994088		0.0101109	0.378255	9.54746	0.10474	0.0237552	3.79188e-06	0.000456832	0.0239836	0.0830039		-0.0338054	0	9.5006	0.105257
						-0.254711	0.377798	9.53646	0.104861	0.0244594	3.78175e-06	0.000463366	0.0246911	0.0816148		0	0.377798	9.54713	0.104744	0.024212	3.79188e-06	0.00045683	0.0244404	0.0830042		-0.40201	0.377798	9.43721	0.105963	0.024212	4.54129e-06	0.00045683	0.0244404	0.0994088		0.0101123	0.377798	9.54712	0.104744	0.024212	3.79188e-06	0.000456832	0.0244405	0.0830039		-0.0342622	0	9.5006	0.105257
						-0.254789	0.377341	9.53611	0.104865	0.0249227	3.7825e-06	0.000463462	0.0251545	0.0816141		0	0.377341	9.54678	0.104747	0.0246688	3.79188e-06	0.00045683	0.0248972	0.0830042		-0.40201	0.377341	9.43681	0.105968	0.0246688	4.54129e-06	0.00045683	0.0248972	0.0994088		0.0101136	0.377341	9.54677	0.104747	0.0246689	3.79188e-06	0.000456832	0.0248973	0.0830039		-0.034719	0	9.5006	0.105257
						-0.254867	0.376884	9.53577	0.104868	0.0253862	3.48964e-06	0.000463561	0.025618	0.0752791		0	0.376884	9.54644	0.104751	0.0251256	3.50675e-06	0.00045683	0.025354	0.0767628		-0.40201	0.376884	9.4364	0.105973	0.0251256	4.34556e-06	0.00045683	0.025354	0.0951244		0.010115	0.376884	9.54643	0.104751	0.0251257	3.50672e-06	0.000456832	0.0253541	0.0767618		-0.0351759	0	9.50059	0.105257
						-0.254945	0.376428	9.53545	0.104872	0.0258498	3.49037e-06	0.000463655	0.0260816	0.0752795		0	0.376428	9.54612	0.104755	0.0255825	3.50675e-06	0.00045683	0.0258109	0.0767628		-0.40201	0.376428	9.43602	0.105977	0.0255825	4.34556e-06	0.00045683	0.0258109	0.0951244		0.0101164	0.376428	9.54611	0.104755	0.0255825	3.50673e-06	0.000456832	0.025811	0.076762		-0.0356327	0	9.50059	0.105257
						-0.255025	0.375971	9.53513	0.104875	0.0263134	3.487e-06	0.000463752	0.0265453	0.075191		0	0.375971	9.5458	0.104758	0.0260393	3.50675e-06	0.00045683	0.0262677	0.0767628		-0.40201	0.375971	9.43563	0.105981	0.0260393	4.34556e-06	0.00045683	0.0262677	0.0951244		0.0101179	0.375971	9.54579	0.104758	0.0260394	3.50673e-06	0.000456832	0.0262678	0.076762		-0.0360895	0	9.50059	0.105257
						-0.255105	0.375514	9.53482	0.104879	0.0267772	3.48045e-06	0.000463851	0.0270091	0.0750338		0	0.375514	9.54548	0.104762	0.0264961	3.50675e-06	0.00045683	0.0267245	0.0767628		-0.40201	0.375514	9.43524	0.105986	0.0264961	4.34556e-06	0.00045683	0.0267245	0.0951244		0.0101193	0.375514	9.54547	0.104762	0.0264962	3.50673e-06	0.000456832	0.0267246	0.076762		-0.0365464	0	9.50059	0.105257
						-0.255185	0.375057	9.5345	0.104882	0.027241	3.4812e-06	0.000463952	0.027473	0.0750336		0	0.375057	9.54516	0.104765	0.0269529	3.50675e-06	0.00045683	0.0271814	0.0767628		-0.40201	0.375057	9.43486	0.10599	0.0269529	4.34556e-06	0.00045683	0.0271814	0.0951244		0.0101207	0.375057	9.54515	0.104765	0.026953	3.50673e-06	0.000456832	0.0271815	0.076762		-0.0370032	0	9.50059	0.105257
						-0.255266	0.3746	9.53418	0.104886	0.027705	3.48197e-06	0.000464056	0.027937	0.0750333		0	0.3746	9.54484	0.104769	0.0274098	3.50675e-06	0.00045683	0.0276382	0.0767628		-0.40201	0.3746	9.43447	0.105994	0.0274098	4.34556e-06	0.00045683	0.0276382	0.0951244		0.0101222	0.3746	9.54483	0.104769	0.0274099	3.50673e-06	0.000456832	0.0276383	0.076762		-0.03746	0	9.50059	0.105257
						-0.255348	0.374143	9.53387	0.104889	0.028169	3.48275e-06	0.000464162	0.0284011	0.075033		0	0.374143	9.54452	0.104772	0.0278666	3.50675e-06	0.00045683	0.028095	0.0767628		-0.40201	0.374143	9.43408	0.105999	0.0278666	4.34556e-06	0.00045683	0.028095	0.0951244		0.0101236	0.374143	9.54451	0.104772	0.0278667	3.50673e-06	0.000456832	0.0280951	0.076762		-0.0379169	0	9.50058	0.105257
						-0.25543	0.373687	9.53355	0.104893	0.0286332	3.48354e-06	0.000464271	0.0288653	0.0750324		0	0.373687	9.5442	0.104776	0.0283234	3.50675e-06	0.00045683	0.0285519	0.0767628		-0.40201	0.373687	9.4337	0.106003	0.0283234	4.34556e-06	0.00045683	0.0285519	0.0951244		0.0101251	0.373687	9.54419	0.104776	0.0283235	3.50673e-06	0.000456832	0.028552	0.076762		-0.0383737	0	9.50058	0.105257
						-0.255512	0.37323	9.53323	0.104896	0.0290975	3.48434e-06	0.000464382	0.0293297	0.0750318		0	0.37323	9.54388	0.104779	0.0287803	3.50675e-06	0.00045683	0.0290087	0.0767628		-0.40201	0.37323	9.43331	0.106007	0.0287803	4.34556e-06	0.00045683	0.0290087	0.0951244		0.0101266	0.37323	9.54387	0.104779	0.0287804	3.50673e-06	0.000456832	0.0290088	0.076762		-0.0388305	0	9.50058	0.105257
						-0.255596	0.372773	9.53292	0.1049	0.0295618	3.48516e-06	0.000464497	0.0297941	0.075031		0	0.372773	9.54356	0.104783	0.0292371	3.50675e-06	0.00045683	0.0294655	0.0767628		-0.40201	0.372773	9.43292	0.106012	0.0292371	4.34556e-06	0.00045683	0.0294655	0.0951244		0.010128	0.372773	9.54355	0.104783	0.0292372	3.50673e-06	0.000456832	0.0294656	0.076762		-0.0392873	0	9.50058	0.105257
						-0.25568	0.372316	9.5326	0.104903	0.0300263	3.486e-06	0.000464614	0.0302586	0.07503		0	0.372316	9.54324	0.104786	0.0296939	3.50675e-06	0.00045683	0.0299223	0.0767628		-0.40201	0.372316	9.43254	0.106016	0.0296939	4.17279e-06	0.00045683	0.0299223	0.0913423		0.0101295	0.372316	9.54323	0.104786	0.029694	3.50673e-06	0.000456832	0.0299224	0.076762		-0.0397442	0	9.50058	0.105257
						-0.255765	0.371859	9.53228	0.104907	0.030491	3.20963e-06	0.000464733	0.0307233	0.069064		0	0.371859	9.54292	0.10479	0.0301508	3.23533e-06	0.00045683	0.0303792	0.0708213		-0.40201	0.371859	9.43216	0.10602	0.0301508	4.17279e-06	0.00045683	0.0303792	0.0913423		0.010131	0.371859	9.54291	0.10479	0.0301509	3.2353e-06	0.000456832	0.0303793	0.0708204		-0.040201	0	9.50058	0.105257
						-0.25585	0.371402	9.53199	0.10491	0.0309557	3.19896e-06	0.000464847	0.0311881	0.0688176		0	0.371402	9.54263	0.104793	0.0306076	3.23533e-06	0.00045683	0.030836	0.0708213		-0.40201	0.371402	9.43179	0.106024	0.0306076	4.17279e-06	0.00045683	0.030836	0.0913423		0.0101326	0.371402	9.54262	0.104793	0.0306077	3.23529e-06	0.000456832	0.0308361	0.0708201		-0.0406578	0	9.50057	0.105257
						-0.255936	0.370946	9.5317	0.104913	0.0314205	3.19976e-06	0.000464963	0.031653	0.0688175		0	0.370946	9.54234	0.104796	0.0310644	3.23533e-06	0.00045683	0.0312928	0.0708213		-0.40201	0.370946	9.43142	0.106029	0.0310644	4.17279e-06	0.00045683	0.0312928	0.0913423		0.0101341	0.370946	9.54232	0.104796	0.0310645	3.23529e-06	0.000456832	0.0312929	0.0708201		-0.0411147	0	9.50057	0.105257
						-0.256023	0.370489	9.53141	0.104916	0.0318855	3.20057e-06	0.000465082	0.032118	0.0688173		0	0.370489	9.54204	0.104799	0.0315212	3.23533e-06	0.00045683	0.0317497	0.0708213		-0.40201	0.370489	9.43105	0.106033	0.0315212	4.17279e-06	0.00045683	0.0317497	0.0913423		0.0101356	0.370489	9.54203	0.1048	0.0315214	3.23529e-06	0.000456832	0.0317498	0.0708201		-0.0415715	0	9.50057	0.105257
						-0.25611	0.370032	9.53112	0.104919	0.0323506	3.20139e-06	0.000465204	0.0325832	0.068817		0	0.370032	9.54175	0.104803	0.0319781	3.23533e-06	0.00045683	0.0322065	0.0708213		-0.40201	0.370032	9.43068	0.106037	0.0319781	4.17279e-06	0.00045683	0.0322065	0.0913423		0.0101372	0.370032	9.54173	0.104803	0.0319782	3.23529e-06	0.000456832	0.0322066	0.0708201		-0.0420283	0	9.50057	0.105257
						-0.256198	0.369575	9.53083	0.104923	0.0328158	3.20268e-06	0.000465329	0.0330484	0.0688261		0	0.369575	9.54145	0.104806	0.0324349	3.23533e-06	0.00045683	0.0326633	0.0708213		-0.40201	0.369575	9.43031	0.106041	0.0324349	4.17279e-06	0.00045683	0.0326633	0.0913423		0.0101387	0.369575	9.54144	0.104806	0.032435	3.23529e-06	0.000456832	0.0326634	0.0708201		-0.0424852	0	9.50057	0.105257
						-0.256286	0.369118	9.53054	0.104926	0.0332811	3.21147e-06	0.000465457	0.0335138	0.068996		0	0.369118	9.54116	0.104809	0.0328917	3.23533e-06	0.00045683	0.0331201	0.0708213		-0.40201	0.369118	9.42994	0.106045	0.0328917	4.17279e-06	0.00045683	0.0331201	0.0913423		0.0101403	0.369118	9.54115	0.104809	0.0328919	3.23529e-06	0.000456832	0.0331203	0.0708201		-0.042942	0	9.50056	0.105257
						-0.256375	0.368661	9.53025	0.104929	0.0337466	3.21241e-06	0.000465589	0.0339794	0.0689966		0	0.368661	9.54086	0.104812	0.0333486	3.23533e-06	0.00045683	0.033577	0.0708213		-0.40201	0.368661	9.42957	0.106049	0.0333486	4.17279e-06	0.00045683	0.033577	0.0913423		0.0101419	0.368661	9.54085	0.104812	0.0333487	3.23529e-06	0.000456832	0.0335771	0.0708201		-0.0433988	0	9.50056	0.105257
						-0.256465	0.368205	9.52996	0.104932	0.0342122	3.21336e-06	0.000465725	0.034445	0.068997		0	0.368205	9.54057	0.104816	0.0338054	3.23533e-06	0.00045683	0.0340338	0.0708213		-0.40201	0.368205	9.4292	0.106054	0.0338054	4.17279e-06	0.00045683	0.0340338	0.0913423		0.0101435	0.368205	9.54056	0.104816	0.0338055	3.23529e-06	0.000456832	0.0340339	0.0708201		-0.0438556	0	9.50056	0.105257
						-0.256556	0.367748	9.52966	0.104935	0.0346779	3.21434e-06	0.000465864	0.0349108	0.0689973		0	0.367748	9.54027	0.104819	0.0342622	3.23533e-06	0.00045683	0.0344906	0.0708213		-0.40201	0.367748	9.42882	0.106058	0.0342622	4.17279e-06	0.00045683	0.0344906	0.0913423		0.0101451	0.367748	9.54026	0.104819	0.0342624	3.23529e-06	0.000456832	0.0344908	0.0708201		-0.0443125	0	9.50056	0.105257
						-0.256647	0.367291	9.52937	0.104939	0.0351437	3.20437e-06	0.000466007	0.0353768	0.0687624		0	0.367291	9.53998	0.104822	0.034719	3.23533e-06	0.00045683	0.0349475	0.0708213		-0.40201	0.367291	9.42845	0.106062	0.034719	4.17279e-06	0.00045683	0.0349475	0.0913423		0.0101467	0.367291	9.53997	0.104822	0.0347192	3.23529e-06	0.000456833	0.0349476	0.0708201		-0.0447693	0	9.50056	0.105257
						-0.256739	0.366834	9.52908	0.104942	0.0356098	2.94574e-06	0.000466153	0.0358428	0.0631925		0	0.366834	9.53968	0.104825	0.0351759	2.97988e-06	0.00045683	0.0354043	0.0652295		-0.40201	0.366834	9.42808	0.106066	0.0351759	3.97673e-06	0.00045683	0.0354043	0.0870506		0.0101484	0.366834	9.53967	0.104825	0.035176	2.97979e-06	0.000456833	0.0354044	0.0652272		-0.0452261	0	9.50055	0.105257
						-0.256832	0.366377	9.52881	0.104945	0.0360759	2.94667e-06	0.000466291	0.0363091	0.0631937		0	0.366377	9.53941	0.104828	0.0356327	2.97988e-06	0.00045683	0.0358611	0.0652295		-0.40201	0.366377	9.42773	0.10607	0.0356327	3.97673e-06	0.00045683	0.0358611	0.0870506		0.01015	0.366377	9.5394	0.104828	0.0356329	2.97982e-06	0.000456833	0.0358613	0.0652278		-0.045683	0	9.50055	0.105257
						-0.256925	0.365921	9.52855	0.104948	0.0365422	2.94761e-06	0.000466433	0.0367754	0.0631947		0	0.365921	9.53914	0.104831	0.0360895	2.97988e-06	0.00045683	0.036318	0.0652295		-0.40201	0.365921	9.42738	0.106074	0.0360895	3.97673e-06	0.00045683	0.036318	0.0870506		0.0101517	0.365921	9.53913	0.104831	0.0360897	2.97982e-06	0.000456833	0.0363181	0.0652278		-0.0461398	0	9.50055	0.105257
						-0.25702	0.365464	9.52828	0.104951	0.0370086	2.94857e-06	0.000466579	0.0372419	0.0631957		0	0.365464	9.53887	0.104834	0.0365464	2.97988e-06	0.00045683	0.0367748	0.0652295		-0.40201	0.365464	9.42702	0.106078	0.0365464	3.97673e-06	0.00045683	0.0367748	0.0870506		0.0101533	0.365464	9.53886	0.104834	0.0365465	2.97982e-06	0.000456833	0.0367749	0.0652278		-0.0465966	0	9.50055	0.105257
						-0.257114	0.365007	9.52801	0.104954	0.0374752	2.94955e-06	0.000466727	0.0377086	0.0631965		0	0.365007	9.5386	0.104837	0.0370032	2.97988e-06	0.00045683	0.0372316	0.0652295		-0.40201	0.365007	9.42667	0.106082	0.0370032	3.97673e-06	0.00045683	0.0372316	0.0870506		0.010155	0.365007	9.53859	0.104837	0.0370033	2.97982e-06	0.000456833	0.0372318	0.0652278		-0.0470534	0	9.50055	0.105257
						-0.25721	0.36455	9.52774	0.104957	0.0379419	2.95055e-06	0.00046688	0.0381754	0.0631972		0	0.36455	9.53833	0.10484	0.03746	2.97988e-06	0.00045683	0.0376884	0.0652295		-0.40201	0.36455	9.42632	0.106086	0.03746	3.97673e-06	0.00045683	0.0376884	0.0870506		0.0101567	0.36455	9.53832	0.10484	0.0374602	2.97982e-06	0.000456833	0.0376886	0.0652278		-0.0475103	0	9.50054	0.105257
						-0.257306	0.364093	9.52748	0.10496	0.0384088	2.95156e-06	0.000467037	0.0386423	0.0631977		0	0.364093	9.53806	0.104843	0.0379169	2.97988e-06	0.00045683	0.0381453	0.0652295		-0.40201	0.364093	9.42596	0.10609	0.0379169	3.97673e-06	0.00045683	0.0381453	0.0870506		0.0101584	0.364093	9.53805	0.104843	0.037917	2.97982e-06	0.000456833	0.0381454	0.0652278		-0.0479671	0	9.50054	0.105257
						-0.257403	0.363636	9.52721	0.104963	0.0388759	2.95259e-06	0.000467197	0.0391095	0.0631981		0	0.363636	9.53779	0.104846	0.0383737	2.97988e-06	0.00045683	0.0386021	0.0652295		-0.40201	0.363636	9.42561	0.106094	0.0383737	3.97673e-06	0.00045683	0.0386021	0.0870506		0.0101601	0.363636	9.53778	0.104846	0.0383738	2.97982e-06	0.000456833	0.0386023	0.0652278		-0.0484239	0	9.50054	0.105257
						-0.257501	0.36318	9.52694	0.104966	0.0393431	2.94397e-06	0.000467361	0.0395767	0.0629913		0	0.36318	9.53752	0.104849	0.0388305	2.97988e-06	0.00045683	0.0390589	0.0652295		-0.40201	0.36318	9.42526	0.106098	0.0388305	3.97673e-06	0.00045683	0.0390589	0.0870506		0.0101619	0.36318	9.5375	0.104849	0.0388307	2.97982e-06	0.000456833	0.0390591	0.0652279		-0.0488808	0	9.50054	0.105257
						-0.2576	0.362723	9.52667	0.104968	0.0398104	2.94142e-06	0.00046753	0.0400442	0.0629141		0	0.362723	9.53724	0.104852	0.0392873	2.97988e-06	0.00045683	0.0395158	0.0652295		-0.40201	0.362723	9.4249	0.106102	0.0392873	3.97673e-06	0.00045683	0.0395158	0.0870506		0.0101636	0.362723	9.53723	0.104852	0.0392875	2.97982e-06	0.000456833	0.0395159	0.0652279		-0.0493376	0	9.50054	0.105257
						-0.257699	0.362266	9.52641	0.104971	0.0402779	2.94249e-06	0.000467703	0.0405118	0.0629136		0	0.362266	9.53697	0.104855	0.0397442	2.97988e-06	0.00045683	0.0399726	0.0652295		-0.40201	0.362266	9.42455	0.106106	0.0397442	3.97673e-06	0.00045683	0.0399726	0.0870506		0.0101653	0.362266	9.53696	0.104855	0.0397443	2.97982e-06	0.000456833	0.0399728	0.0652279		-0.0497944	0	9.50053	0.105257
						-0.2578	0.361809	9.52614	0.104974	0.0407456	2.70648e-06	0.000467881	0.0409796	0.0578454		0	0.361809	9.5367	0.104858	0.040201	2.74164e-06	0.00045683	0.0404294	0.0600145		-0.40201	0.361809	9.4242	0.10611	0.040201	3.80423e-06	0.00045683	0.0404294	0.0832745		0.0101671	0.361809	9.53669	0.104858	0.0402012	2.74153e-06	0.000456833	0.0404296	0.0600117		-0.0502513	0	9.50053	0.105257
						-0.257901	0.361352	9.52589	0.104977	0.0412135	2.70749e-06	0.000468049	0.0414476	0.0578464		0	0.361352	9.53645	0.104861	0.0406578	2.74164e-06	0.00045683	0.0408862	0.0600145		-0.40201	0.361352	9.42386	0.106114	0.0406578	3.80423e-06	0.00045683	0.0408862	0.0832745		0.0101689	0.361352	9.53644	0.104861	0.040658	2.74157e-06	0.000456833	0.0408864	0.0600125		-0.0507081	0	9.50053	0.105257
						-0.258003	0.360895	9.52565	0.10498	0.0416816	2.70853e-06	0.00046822	0.0419157	0.0578473		0	0.360895	9.5362	0.104864	0.0411147	2.74164e-06	0.00045683	0.0413431	0.0600145		-0.40201	0.360895	9.42352	0.106117	0.0411147	3.80423e-06	0.00045683	0.0413431	0.0832745		0.0101707	0.360895	9.53619	0.104864	0.0411148	2.74157e-06	0.000456833	0.0413433	0.0600125		-0.0511649	0	9.50053	0.105257
						-0.258105	0.360439	9.5254	0.104982	0.0421498	2.70958e-06	0.000468396	0.042384	0.0578481		0	0.360439	9.53595	0.104866	0.0415715	2.74164e-06	0.00045683	0.0417999	0.0600145		-0.40201	0.360439	9.42318	0.106121	0.0415715	3.80423e-06	0.00045683	0.0417999	0.0832745		0.0101725	0.360439	9.53594	0.104866	0.0415717	2.74157e-06	0.000456833	0.0418001	0.0600125		-0.0516217	0	9.50052	0.105257
						-0.258209	0.359982	9.52516	0.104985	0.0426182	2.71065e-06	0.000468576	0.0428525	0.0578487		0	0.359982	9.53571	0.104869	0.0420283	2.74164e-06	0.00045683	0.0422567	0.0600145		-0.40201	0.359982	9.42284	0.106125	0.0420283	3.80423e-06	0.00045683	0.0422567	0.0832745		0.0101743	0.359982	9.53569	0.104869	0.0420285	2.74157e-06	0.000456833	0.0422569	0.0600125		-0.0520786	0	9.50052	0.105257
						-0.258313	0.359525	9.52491	0.104988	0.0430868	2.71174e-06	0.000468761	0.0433212	0.0578492		0	0.359525	9.53546	0.104872	0.0424852	2.74164e-06	0.00045683	0.0427136	0.0600145		-0.40201	0.359525	9.42251	0.106129	0.0424852	3.80423e-06	0.00045683	0.0427136	0.0832745		0.0101761	0.359525	9.53544	0.104872	0.0424853	2.74157e-06	0.000456833	0.0427138	0.0600125		-0.0525354	0	9.50052	0.105257
						-0.258418	0.359068	9.52466	0.104991	0.0435555	2.70294e-06	0.000468951	0.04379	0.057638		0	0.359068	9.53521	0.104874	0.042942	2.74164e-06	0.00045683	0.0431704	0.0600145		-0.40201	0.359068	9.42217	0.106133	0.042942	3.80423e-06	0.00045683	0.0431704	0.0832745		0.0101779	0.359068	9.5352	0.104875	0.0429422	2.74157e-06	0.000456833	0.0431706	0.0600125		-0.0529922	0	9.50052	0.105257
						-0.258524	0.358611	9.52442	0.104993	0.0440245	2.70053e-06	0.000469145	0.0442591	0.0575628		0	0.358611	9.53496	0.104877	0.0433988	2.74164e-06	0.00045683	0.0436272	0.0600145		-0.40201	0.358611	9.42183	0.106136	0.0433988	3.80423e-06	0.00045683	0.0436272	0.0832745		0.0101798	0.358611	9.53495	0.104877	0.043399	2.74157e-06	0.000456833	0.0436274	0.0600125		-0.0534491	0	9.50051	0.105257
						-0.258631	0.358154	9.52417	0.104996	0.0444936	2.70166e-06	0.000469344	0.0447283	0.0575624		0	0.358154	9.53471	0.10488	0.0438556	2.74164e-06	0.00045683	0.0440841	0.0600145		-0.40201	0.358154	9.42149	0.10614	0.0438556	3.80423e-06	0.00045683	0.0440841	0.0832745		0.0101817	0.358154	9.5347	0.10488	0.0438558	2.74157e-06	0.000456833	0.0440843	0.0600125		-0.0539059	0	9.50051	0.105257
						-0.258739	0.357698	9.52393	0.104999	0.044963	2.70281e-06	0.000469549	0.0451977	0.0575618		0	0.357698	9.53446	0.104883	0.0443125	2.74164e-06	0.00045683	0.0445409	0.0600145		-0.40201	0.357698	9.42116	0.106144	0.0443125	3.80423e-06	0.00045683	0.0445409	0.0832745		0.0101835	0.357698	9.53445	0.104883	0.0443127	2.74157e-06	0.000456833	0.0445411	0.0600125		-0.0543627	0	9.50051	0.105258
						-0.258847	0.357241	9.52368	0.105001	0.0454325	2.70398e-06	0.000469759	0.0456674	0.057561		0	0.357241	9.53421	0.104885	0.0447693	2.74164e-06	0.00045683	0.0449977	0.0600145		-0.40201	0.357241	9.42082	0.106148	0.0447693	3.80423e-06	0.00045683	0.0449977	0.0832745		0.0101854	0.357241	9.5342	0.104886	0.0447695	2.74157e-06	0.000456834	0.0449979	0.0600125		-0.0548196	0	9.50051	0.105258
						-0.258957	0.356784	9.52344	0.105004	0.0459023	2.48795e-06	0.000469975	0.0461373	0.0529379		0	0.356784	9.53396	0.104888	0.0452261	2.521e-06	0.00045683	0.0454545	0.0551847		-0.40201	0.356784	9.42048	0.106152	0.0452261	3.63925e-06	0.00045683	0.0454545	0.0796631		0.0101873	0.356784	9.53395	0.104888	0.0452263	2.52086e-06	0.000456834	0.0454548	0.0551812		-0.0552764	0	9.5005	0.105258
						-0.259067	0.356327	9.52321	0.105007	0.0463723	2.48906e-06	0.000470177	0.0466073	0.0529387		0	0.356327	9.53373	0.104891	0.045683	2.521e-06	0.00045683	0.0459114	0.0551847		-0.40201	0.356327	9.42016	0.106155	0.045683	3.63925e-06	0.00045683	0.0459114	0.0796631		0.0101892	0.356327	9.53372	0.104891	0.0456832	2.52092e-06	0.000456834	0.0459116	0.0551823		-0.0557332	0	9.5005	0.105258
						-0.259178	0.35587	9.52299	0.105009	0.0468424	2.49018e-06	0.000470384	0.0470776	0.0529394		0	0.35587	9.5335	0.104893	0.0461398	2.521e-06	0.00045683	0.0463682	0.0551847		-0.40201	0.35587	9.41983	0.106159	0.0461398	3.63925e-06	0.00045683	0.0463682	0.0796631		0.0101912	0.35587	9.53349	0.104893	0.04614	2.52092e-06	0.000456834	0.0463684	0.0551823		-0.05619	0	9.5005	0.105258
						-0.25929	0.355413	9.52276	0.105012	0.0473128	2.49133e-06	0.000470597	0.0475481	0.0529399		0	0.355413	9.53327	0.104896	0.0465966	2.521e-06	0.00045683	0.046825	0.0551847		-0.40201	0.355413	9.41951	0.106163	0.0465966	3.63925e-06	0.00045683	0.046825	0.0796631		0.0101931	0.355413	9.53326	0.104896	0.0465968	2.52092e-06	0.000456834	0.0468253	0.0551824		-0.0566469	0	9.5005	0.105258
						-0.259403	0.354957	9.52253	0.105014	0.0477834	2.48089e-06	0.000470815	0.0480188	0.0526935		0	0.354957	9.53304	0.104898	0.0470534	2.521e-06	0.00045683	0.0472819	0.0551847		-0.40201	0.354957	9.41919	0.106166	0.0470534	3.63925e-06	0.00045683	0.0472819	0.0796631		0.010195	0.354957	9.53303	0.104898	0.0470537	2.52092e-06	0.000456834	0.0472821	0.0551824		-0.0571037	0	9.50049	0.105258
						-0.259517	0.3545	9.52231	0.105017	0.0482542	2.48028e-06	0.000471038	0.0484897	0.0526555		0	0.3545	9.53282	0.104901	0.0475103	2.521e-06	0.00045683	0.0477387	0.0551847		-0.40201	0.3545	9.41887	0.10617	0.0475103	3.63925e-06	0.00045683	0.0477387	0.0796631		0.010197	0.3545	9.5328	0.104901	0.0475105	2.52092e-06	0.000456834	0.0477389	0.0551824		-0.0575605	0	9.50049	0.105258
						-0.259632	0.354043	9.52208	0.105019	0.0487253	2.48147e-06	0.000471268	0.0489609	0.0526551		0	0.354043	9.53259	0.104903	0.0479671	2.521e-06	0.00045683	0.0481955	0.0551847		-0.40201	0.354043	9.41854	0.106174	0.0479671	3.63925e-06	0.00045683	0.0481955	0.0796631		0.010199	0.354043	9.53257	0.104903	0.0479673	2.52092e-06	0.000456834	0.0481958	0.0551824		-0.0580174	0	9.50049	0.105258
						-0.259748	0.353586	9.52186	0.105022	0.0491965	2.48268e-06	0.000471503	0.0494323	0.0526546		0	0.353586	9.53236	0.104906	0.0484239	2.521e-06	0.00045683	0.0486524	0.0551847		-0.40201	0.353586	9.41822	0.106177	0.0484239	3.63925e-06	0.00045683	0.0486524	0.0796631		0.010201	0.353586	9.53235	0.104906	0.0484242	2.52092e-06	0.000456834	0.0486526	0.0551824		-0.0584742	0	9.50049	0.105258
						-0.259864	0.353129	9.52163	0.105024	0.049668	2.48391e-06	0.000471745	0.0499039	0.0526538		0	0.353129	9.53213	0.104908	0.0488808	2.521e-06	0.00045683	0.0491092	0.0551847		-0.40201	0.353129	9.4179	0.106181	0.0488808	3.63925e-06	0.00045683	0.0491092	0.0796631		0.010203	0.353129	9.53212	0.104908	0.048881	2.52092e-06	0.000456834	0.0491094	0.0551824		-0.058931	0	9.50048	0.105258
						-0.259982	0.352672	9.52141	0.105026	0.0501398	2.48517e-06	0.000471993	0.0503758	0.0526528		0	0.352672	9.5319	0.104911	0.0493376	2.521e-06	0.00045683	0.049566	0.0551847		-0.40201	0.352672	9.41757	0.106184	0.0493376	3.63925e-06	0.00045683	0.049566	0.0796631		0.010205	0.352672	9.53189	0.104911	0.0493379	2.52092e-06	0.000456834	0.0495663	0.0551824		-0.0593878	0	9.50048	0.105258
						-0.260101	0.352216	9.52118	0.105029	0.0506118	2.48645e-06	0.000472247	0.0508479	0.0526515		0	0.352216	9.53167	0.104913	0.0497944	2.521e-06	0.00045683	0.0500228	0.0551847		-0.40201	0.352216	9.41725	0.106188	0.0497944	3.49451e-06	0.00045683	0.0500228	0.0764949		0.010207	0.352216	9.53166	0.104914	0.0497947	2.52092e-06	0.000456834	0.0500231	0.0551824		-0.0598447	0	9.50048	0.105258
						-0.26022	0.351759	9.52096	0.105031	0.051084	2.29037e-06	0.000472509	0.0513203	0.0484725		0	0.351759	9.53144	0.104916	0.0502513	2.31768e-06	0.00045683	0.0504797	0.0507341		-0.40201	0.351759	9.41694	0.106192	0.0502513	3.49451e-06	0.00045683	0.0504797	0.0764949		0.0102091	0.351759	9.53143	0.104916	0.0502515	2.31752e-06	0.000456834	0.0504799	0.0507301		-0.0603015	0	9.50048	0.105258
						-0.260341	0.351302	9.52075	0.105034	0.0515565	2.28999e-06	0.000472755	0.0517929	0.0484394		0	0.351302	9.53123	0.104918	0.0507081	2.31768e-06	0.00045683	0.0509365	0.0507341		-0.40201	0.351302	9.41663	0.106195	0.0507081	3.49451e-06	0.00045683	0.0509365	0.0764949		0.0102111	0.351302	9.53122	0.104918	0.0507084	2.31759e-06	0.000456834	0.0509368	0.0507315		-0.0607583	0	9.50047	0.105258
						-0.260463	0.350845	9.52054	0.105036	0.0520293	2.27963e-06	0.000473006	0.0522658	0.0481945		0	0.350845	9.53102	0.104921	0.0511649	2.31768e-06	0.00045683	0.0513933	0.0507341		-0.40201	0.350845	9.41632	0.106199	0.0511649	3.49451e-06	0.00045683	0.0513933	0.0764949		0.0102132	0.350845	9.53101	0.104921	0.0511652	2.31759e-06	0.000456834	0.0513936	0.0507315		-0.0612152	0	9.50047	0.105258
						-0.260586	0.350388	9.52034	0.105038	0.0525023	2.28087e-06	0.000473265	0.0527389	0.0481943		0	0.350388	9.53081	0.104923	0.0516217	2.31768e-06	0.00045683	0.0518502	0.0507341		-0.40201	0.350388	9.41601	0.106202	0.0516217	3.49451e-06	0.00045683	0.0518502	0.0764949		0.0102153	0.350388	9.5308	0.104923	0.051622	2.31759e-06	0.000456834	0.0518504	0.0507315		-0.061672	0	9.50047	0.105258
						-0.260709	0.349931	9.52013	0.105041	0.0529756	2.28213e-06	0.00047353	0.0532123	0.048194		0	0.349931	9.5306	0.104925	0.0520786	2.31768e-06	0.00045683	0.052307	0.0507341		-0.40201	0.349931	9.4157	0.106206	0.0520786	3.49451e-06	0.00045683	0.052307	0.0764949		0.0102174	0.349931	9.53059	0.104925	0.0520789	2.31759e-06	0.000456834	0.0523073	0.0507315		-0.0621288	0	9.50046	0.105258
						-0.260834	0.349475	9.51992	0.105043	0.0534491	2.28341e-06	0.000473802	0.053686	0.0481934		0	0.349475	9.53039	0.104928	0.0525354	2.31768e-06	0.00045683	0.0527638	0.0507341		-0.40201	0.349475	9.41539	0.106209	0.0525354	3.49451e-06	0.00045683	0.0527638	0.0764949		0.0102195	0.349475	9.53038	0.104928	0.0525357	2.31759e-06	0.000456835	0.0527641	0.0507315		-0.0625857	0	9.50046	0.105258
						-0.260959	0.349018	9.51972	0.105045	0.0539229	2.28472e-06	0.00047408	0.0541599	0.0481926		0	0.349018	9.53018	0.10493	0.0529922	2.31768e-06	0.00045683	0.0532206	0.0507341		-0.40201	0.349018	9.41508	0.106213	0.0529922	3.49451e-06	0.00045683	0.0532206	0.0764949		0.0102216	0.349018	9.53017	0.10493	0.0529925	2.31759e-06	0.000456835	0.0532209	0.0507315		-0.0630425	0	9.50046	0.105258
						-0.261086	0.348561	9.51951	0.105047	0.054397	2.28605e-06	0.000474367	0.0546341	0.0481916		0	0.348561	9.52997	0.104932	0.0534491	2.31768e-06	0.00045683	0.0536775	0.0507341		-0.40201	0.348561	9.41477	0.106216	0.0534491	3.49451e-06	0.00045683	0.0536775	0.0764949		0.0102238	0.348561	9.52996	0.104932	0.0534494	2.31759e-06	0.000456835	0.0536778	0.0507315		-0.0634993	0	9.50045	0.105258
						-0.261214	0.348104	9.5193	0.10505	0.0548713	2.29085e-06	0.000474661	0.0551087	0.048263		0	0.348104	9.52976	0.104934	0.0539059	2.31768e-06	0.00045683	0.0541343	0.0507341		-0.40201	0.348104	9.41446	0.10622	0.0539059	3.49451e-06	0.00045683	0.0541343	0.0764949		0.0102259	0.348104	9.52975	0.104935	0.0539062	2.31759e-06	0.000456835	0.0541346	0.0507315		-0.0639561	0	9.50045	0.105258
						-0.261343	0.347647	9.51909	0.105052	0.055346	2.30113e-06	0.000474964	0.0555835	0.0484484		0	0.347647	9.52955	0.104937	0.0543627	2.31768e-06	0.00045683	0.0545911	0.0507341		-0.40201	0.347647	9.41415	0.106223	0.0543627	3.49451e-06	0.00045683	0.0545911	0.0764949		0.0102281	0.347647	9.52954	0.104937	0.054363	2.31759e-06	0.000456835	0.0545914	0.0507315		-0.064413	0	9.50045	0.105258
						-0.261473	0.34719	9.51889	0.105054	0.055821	2.2958e-06	0.000475278	0.0560586	0.0483043		0	0.34719	9.52934	0.104939	0.0548196	2.31768e-06	0.00045683	0.055048	0.0507341		-0.40201	0.34719	9.41384	0.106227	0.0548196	3.49451e-06	0.00045683	0.055048	0.0764949		0.0102303	0.34719	9.52932	0.104939	0.0548199	2.31759e-06	0.000456835	0.0550483	0.0507315		-0.0648698	0	9.50045	0.105258
						-0.261604	0.346734	9.51868	0.105057	0.0562962	2.11261e-06	0.000475601	0.056534	0.0444198		0	0.346734	9.52913	0.104941	0.0552764	2.13101e-06	0.00045683	0.0555048	0.0466478		-0.40201	0.346734	9.41353	0.10623	0.0552764	3.33012e-06	0.00045683	0.0555048	0.0728964		0.0102325	0.346734	9.52911	0.104942	0.0552767	2.13083e-06	0.000456835	0.0555051	0.0466432		-0.0653266	0	9.50044	0.105258
						-0.261736	0.346277	9.51849	0.105059	0.0567718	2.11404e-06	0.000475904	0.0570098	0.0444216		0	0.346277	9.52893	0.104944	0.0557332	2.13101e-06	0.00045683	0.0559616	0.0466478		-0.40201	0.346277	9.41324	0.106233	0.0557332	3.33012e-06	0.00045683	0.0559616	0.0728964		0.0102347	0.346277	9.52892	0.104944	0.0557335	2.13091e-06	0.000456835	0.055962	0.046645		-0.0657835	0	9.50044	0.105258
						-0.26187	0.34582	9.5183	0.105061	0.0572477	2.11549e-06	0.000476214	0.0574858	0.0444232		0	0.34582	9.52874	0.104946	0.05619	2.13101e-06	0.00045683	0.0564185	0.0466478		-0.40201	0.34582	9.41294	0.106237	0.05619	3.33012e-06	0.00045683	0.0564185	0.0728964		0.0102369	0.34582	9.52873	0.104946	0.0561904	2.13091e-06	0.000456835	0.0564188	0.046645		-0.0662403	0	9.50044	0.105258
						-0.262004	0.345363	9.5181	0.105063	0.057724	2.11698e-06	0.000476533	0.0579622	0.0444246		0	0.345363	9.52854	0.104948	0.0566469	2.13101e-06	0.00045683	0.0568753	0.0466478		-0.40201	0.345363	9.41265	0.10624	0.0566469	3.33012e-06	0.00045683	0.0568753	0.0728964		0.0102391	0.345363	9.52853	0.104948	0.0566472	2.13091e-06	0.000456835	0.0568756	0.046645		-0.0666971	0	9.50043	0.105258
						-0.26214	0.344906	9.51791	0.105065	0.0582005	2.11849e-06	0.000476859	0.0584389	0.0444258		0	0.344906	9.52835	0.10495	0.0571037	2.13101e-06	0.00045683	0.0573321	0.0466478		-0.40201	0.344906	9.41235	0.106243	0.0571037	3.33012e-06	0.00045683	0.0573321	0.0728964		0.0102414	0.344906	9.52834	0.10495	0.057104	2.13091e-06	0.000456835	0.0573325	0.046645		-0.067154	0	9.50043	0.105258
						-0.262277	0.34445	9.51772	0.105067	0.0586773	2.12002e-06	0.000477195	0.0589159	0.0444268		0	0.34445	9.52816	0.104952	0.0575605	2.13101e-06	0.00045683	0.0577889	0.0466478		-0.40201	0.34445	9.41206	0.106247	0.0575605	3.33012e-06	0.00045683	0.0577889	0.0728964		0.0102437	0.34445	9.52815	0.104952	0.0575609	2.13091e-06	0.000456835	0.0577893	0.046645		-0.0676108	0	9.50043	0.105258
						-0.262414	0.343993	9.51753	0.105069	0.0591545	2.12159e-06	0.000477539	0.0593933	0.0444276		0	0.343993	9.52796	0.104954	0.0580174	2.13101e-06	0.00045683	0.0582458	0.0466478		-0.40201	0.343993	9.41176	0.10625	0.0580174	3.33012e-06	0.00045683	0.0582458	0.0728964		0.0102459	0.343993	9.52795	0.104954	0.0580177	2.13091e-06	0.000456835	0.0582461	0.046645		-0.0680676	0	9.50042	0.105258
						-0.262554	0.343536	9.51734	0.105071	0.0596321	2.1228e-06	0.000477893	0.059871	0.0444201		0	0.343536	9.52777	0.104956	0.0584742	2.13101e-06	0.00045683	0.0587026	0.0466478		-0.40201	0.343536	9.41147	0.106253	0.0584742	3.33012e-06	0.00045683	0.0587026	0.0728964		0.0102482	0.343536	9.52776	0.104956	0.0584745	2.13091e-06	0.000456835	0.058703	0.0466451		-0.0685244	0	9.50042	0.105259
						-0.262694	0.343079	9.51714	0.105074	0.06011	2.1112e-06	0.000478256	0.0603491	0.0441438		0	0.343079	9.52758	0.104958	0.058931	2.13101e-06	0.00045683	0.0591594	0.0466478		-0.40201	0.343079	9.41117	0.106257	0.058931	3.33012e-06	0.00045683	0.0591594	0.0728964		0.0102506	0.343079	9.52757	0.104959	0.0589314	2.13091e-06	0.000456836	0.0591598	0.0466451		-0.0689813	0	9.50042	0.105259
						-0.262835	0.342622	9.51695	0.105076	0.0605882	2.11283e-06	0.000478629	0.0608275	0.0441435		0	0.342622	9.52738	0.104961	0.0593878	2.13101e-06	0.00045683	0.0596163	0.0466478		-0.40201	0.342622	9.41088	0.10626	0.0593878	3.33012e-06	0.00045683	0.0596163	0.0728964		0.0102529	0.342622	9.52737	0.104961	0.0593882	2.13091e-06	0.000456836	0.0596166	0.0466451		-0.0694381	0	9.50041	0.105259
						-0.262978	0.342165	9.51676	0.105078	0.0610669	2.11449e-06	0.000479012	0.0613064	0.0441428		0	0.342165	9.52719	0.104963	0.0598447	2.13101e-06	0.00045683	0.0600731	0.0466478		-0.40201	0.342165	9.41058	0.106263	0.0598447	3.19722e-06	0.00045683	0.0600731	0.0699872		0.0102552	0.342165	9.52718	0.104963	0.0598451	2.13091e-06	0.000456836	0.0600735	0.0466451		-0.0698949	0	9.50041	0.105259
						-0.263122	0.341709	9.51657	0.10508	0.0615459	1.95548e-06	0.000479406	0.0617856	0.0407897		0	0.341709	9.527	0.104965	0.0603015	1.96004e-06	0.00045683	0.0605299	0.0429052		-0.40201	0.341709	9.4103	0.106267	0.0603015	3.19722e-06	0.00045683	0.0605299	0.0699872		0.0102576	0.341709	9.52699	0.104965	0.0603019	1.95983e-06	0.000456836	0.0605303	0.0429		-0.0703518	0	9.50041	0.105259
						-0.263268	0.341252	9.51639	0.105082	0.0620253	1.95707e-06	0.000479778	0.0622652	0.0407911		0	0.341252	9.52682	0.104967	0.0607583	1.96004e-06	0.00045683	0.0609868	0.0429052		-0.40201	0.341252	9.41002	0.10627	0.0607583	3.19722e-06	0.00045683	0.0609868	0.0699872		0.01026	0.341252	9.52681	0.104967	0.0607587	1.95993e-06	0.000456836	0.0609871	0.0429022		-0.0708086	0	9.5004	0.105259
						-0.263414	0.340795	9.51621	0.105084	0.0625051	1.95868e-06	0.000480159	0.0627451	0.0407923		0	0.340795	9.52664	0.104969	0.0612152	1.96004e-06	0.00045683	0.0614436	0.0429052		-0.40201	0.340795	9.40974	0.106273	0.0612152	3.19722e-06	0.00045683	0.0614436	0.0699872		0.0102623	0.340795	9.52663	0.104969	0.0612156	1.95993e-06	0.000456836	0.061444	0.0429022		-0.0712654	0	9.5004	0.105259
						-0.263562	0.340338	9.51604	0.105086	0.0629852	1.96032e-06	0.00048055	0.0632255	0.0407932		0	0.340338	9.52646	0.104971	0.061672	1.96004e-06	0.00045683	0.0619004	0.0429052		-0.40201	0.340338	9.40945	0.106276	0.061672	3.19722e-06	0.00045683	0.0619004	0.0699872		0.0102647	0.340338	9.52645	0.104971	0.0616724	1.95993e-06	0.000456836	0.0619008	0.0429022		-0.0717222	0	9.5004	0.105259
						-0.263711	0.339881	9.51586	0.105088	0.0634658	1.96199e-06	0.000480951	0.0637062	0.0407939		0	0.339881	9.52629	0.104973	0.0621288	1.96004e-06	0.00045683	0.0623572	0.0429052		-0.40201	0.339881	9.40917	0.106279	0.0621288	3.19722e-06	0.00045683	0.0623572	0.0699872		0.0102672	0.339881	9.52627	0.104973	0.0621292	1.95993e-06	0.000456836	0.0623576	0.0429022		-0.0721791	0	9.50039	0.105259
						-0.263862	0.339424	9.51568	0.10509	0.0639467	1.95483e-06	0.000481363	0.0641874	0.0406104		0	0.339424	9.52611	0.104975	0.0625857	1.96004e-06	0.00045683	0.0628141	0.0429052		-0.40201	0.339424	9.40889	0.106283	0.0625857	3.19722e-06	0.00045683	0.0628141	0.0699872		0.0102696	0.339424	9.5261	0.104975	0.0625861	1.95993e-06	0.000456836	0.0628145	0.0429022		-0.0726359	0	9.50039	0.105259
						-0.264013	0.338968	9.51551	0.105092	0.0644281	1.95265e-06	0.000481787	0.064669	0.0405293		0	0.338968	9.52593	0.104977	0.0630425	1.96004e-06	0.00045683	0.0632709	0.0429052		-0.40201	0.338968	9.4086	0.106286	0.0630425	3.19722e-06	0.00045683	0.0632709	0.0699872		0.010272	0.338968	9.52592	0.104977	0.0630429	1.95993e-06	0.000456836	0.0632713	0.0429022		-0.0730927	0	9.50039	0.105259
						-0.264166	0.338511	9.51533	0.105094	0.0649099	1.95438e-06	0.000482221	0.065151	0.0405288		0	0.338511	9.52575	0.104979	0.0634993	1.96004e-06	0.00045683	0.0637277	0.0429052		-0.40201	0.338511	9.40832	0.106289	0.0634993	3.19722e-06	0.00045683	0.0637277	0.0699872		0.0102745	0.338511	9.52574	0.104979	0.0634997	1.95993e-06	0.000456836	0.0637282	0.0429022		-0.0735496	0	9.50038	0.105259
						-0.264321	0.338054	9.51515	0.105096	0.0653921	1.95615e-06	0.000482667	0.0656334	0.040528		0	0.338054	9.52557	0.104981	0.0639561	1.96004e-06	0.00045683	0.0641846	0.0429052		-0.40201	0.338054	9.40804	0.106292	0.0639561	3.19722e-06	0.00045683	0.0641846	0.0699872		0.010277	0.338054	9.52556	0.104981	0.0639566	1.95993e-06	0.000456836	0.064185	0.0429022		-0.0740064	0	9.50038	0.105259
						-0.264477	0.337597	9.51497	0.105097	0.0658747	1.95796e-06	0.000483125	0.0661163	0.0405269		0	0.337597	9.5254	0.104983	0.064413	1.96004e-06	0.00045683	0.0646414	0.0429052		-0.40201	0.337597	9.40775	0.106295	0.064413	3.19722e-06	0.00045683	0.0646414	0.0699872		0.0102795	0.337597	9.52539	0.104983	0.0644134	1.95993e-06	0.000456837	0.0646418	0.0429022		-0.0744632	0	9.50038	0.105259
						-0.264634	0.33714	9.5148	0.105099	0.0663579	1.9598e-06	0.000483596	0.0665997	0.0405255		0	0.33714	9.52522	0.104984	0.0648698	1.96004e-06	0.00045683	0.0650982	0.0429052		-0.40201	0.33714	9.40747	0.106298	0.0648698	3.19722e-06	0.00045683	0.0650982	0.0699872		0.010282	0.33714	9.52521	0.104985	0.0648702	1.95993e-06	0.000456837	0.0650987	0.0429022		-0.0749201	0	9.50037	0.105259
						-0.264792	0.336683	9.51462	0.105101	0.0668415	1.81685e-06	0.000484081	0.0670835	0.037532		0	0.336683	9.52504	0.104986	0.0653266	1.80387e-06	0.00045683	0.065555	0.0394866		-0.40201	0.336683	9.40719	0.106302	0.0653266	3.04626e-06	0.00045683	0.065555	0.0666826		0.0102845	0.336683	9.52503	0.104987	0.0653271	1.80345e-06	0.000456837	0.0655555	0.0394769		-0.0753769	0	9.50037	0.105259
						-0.264953	0.336227	9.51446	0.105103	0.0673256	1.81861e-06	0.000484538	0.0675678	0.0375328		0	0.336227	9.52488	0.104988	0.0657835	1.80387e-06	0.00045683	0.0660119	0.0394866		-0.40201	0.336227	9.40692	0.106305	0.0657835	3.04626e-06	0.00045683	0.0660119	0.0666826		0.0102871	0.336227	9.52487	0.104988	0.0657839	1.80357e-06	0.000456837	0.0660123	0.0394795		-0.0758337	0	9.50036	0.105259
						-0.265114	0.33577	9.51429	0.105105	0.0678101	1.81426e-06	0.000485007	0.0680526	0.0374069		0	0.33577	9.52471	0.10499	0.0662403	1.80387e-06	0.00045683	0.0664687	0.0394866		-0.40201	0.33577	9.40665	0.106308	0.0662403	3.04626e-06	0.00045683	0.0664687	0.0666826		0.0102896	0.33577	9.5247	0.10499	0.0662408	1.80357e-06	0.000456837	0.0664692	0.0394795		-0.0762905	0	9.50036	0.105259
						-0.265277	0.335313	9.51413	0.105107	0.0682951	1.81016e-06	0.000485489	0.0685378	0.0372852		0	0.335313	9.52455	0.104992	0.0666971	1.80387e-06	0.00045683	0.0669255	0.0394866		-0.40201	0.335313	9.40638	0.106311	0.0666971	3.04626e-06	0.00045683	0.0669255	0.0666826		0.0102922	0.335313	9.52454	0.104992	0.0666976	1.80357e-06	0.000456837	0.066926	0.0394795		-0.0767474	0	9.50036	0.105259
						-0.265441	0.334856	9.51396	0.105109	0.0687806	1.81198e-06	0.000485983	0.0690236	0.0372849		0	0.334856	9.52439	0.104994	0.067154	1.80387e-06	0.00045683	0.0673824	0.0394866		-0.40201	0.334856	9.40611	0.106314	0.067154	3.04626e-06	0.00045683	0.0673824	0.0666826		0.0102948	0.334856	9.52438	0.104994	0.0671544	1.80357e-06	0.000456837	0.0673829	0.0394795		-0.0772042	0	9.50035	0.105259
						-0.265607	0.334399	9.5138	0.10511	0.0692666	1.81385e-06	0.000486491	0.0695098	0.0372843		0	0.334399	9.52422	0.104995	0.0676108	1.80387e-06	0.00045683	0.0678392	0.0394866		-0.40201	0.334399	9.40584	0.106317	0.0676108	3.04626e-06	0.00045683	0.0678392	0.0666826		0.0102974	0.334399	9.52421	0.104996	0.0676113	1.80357e-06	0.000456837	0.0678397	0.0394795		-0.077661	0	9.50035	0.105259
						-0.265774	0.333942	9.51363	0.105112	0.0697531	1.81574e-06	0.000487012	0.0699966	0.0372834		0	0.333942	9.52406	0.104997	0.0680676	1.80387e-06	0.00045683	0.068296	0.0394866		-0.40201	0.333942	9.40557	0.10632	0.0680676	3.04626e-06	0.00045683	0.068296	0.0666826		0.0103	0.333942	9.52405	0.104997	0.0680681	1.80357e-06	0.000456837	0.0682965	0.0394795		-0.0781179	0	9.50034	0.105259
						-0.265943	0.333486	9.51347	0.105114	0.0702401	1.81768e-06	0.000487547	0.0704838	0.0372821		0	0.333486	9.5239	0.104999	0.0685244	1.80387e-06	0.00045683	0.0687529	0.0394866		-0.40201	0.333486	9.4053	0.106323	0.0685244	3.04626e-06	0.00045683	0.0687529	0.0666826		0.0103026	0.333486	9.52388	0.104999	0.0685249	1.80357e-06	0.000456837	0.0687534	0.0394795		-0.0785747	0	9.50034	0.105259
						-0.266114	0.333029	9.51331	0.105116	0.0707276	1.81965e-06	0.000488097	0.0709717	0.0372804		0	0.333029	9.52373	0.105001	0.0689813	1.80387e-06	0.00045683	0.0692097	0.0394866		-0.40201	0.333029	9.40503	0.106326	0.0689813	3.04626e-06	0.00045683	0.0692097	0.0666826		0.0103053	0.333029	9.52372	0.105001	0.0689818	1.80357e-06	0.000456837	0.0692102	0.0394795		-0.0790315	0	9.50034	0.105259
						-0.266285	0.332572	9.51314	0.105118	0.0712157	1.8339e-06	0.000488662	0.07146	0.037529		0	0.332572	9.52357	0.105003	0.0694381	1.80387e-06	0.00045683	0.0696665	0.0394866		-0.40201	0.332572	9.40476	0.106329	0.0694381	3.04626e-06	0.00045683	0.0696665	0.0666826		0.010308	0.332572	9.52356	0.105003	0.0694386	1.80357e-06	0.000456838	0.069667	0.0394795		-0.0794884	0	9.50033	0.105259
						-0.266459	0.332115	9.51297	0.10512	0.0717044	1.83483e-06	0.000489251	0.071949	0.0375028		0	0.332115	9.5234	0.105004	0.0698949	1.80387e-06	0.00045683	0.0701233	0.0394866		-0.40201	0.332115	9.40449	0.106332	0.0698949	3.04626e-06	0.00045683	0.0701233	0.0666826		0.0103107	0.332115	9.52339	0.105005	0.0698955	1.80357e-06	0.000456838	0.0701239	0.0394795		-0.0799452	0	9.50033	0.10526
						-0.266634	0.331658	9.51281	0.105121	0.0721936	1.70117e-06	0.000489859	0.0724386	0.0347278		0	0.331658	9.52324	0.105006	0.0703518	1.66082e-06	0.00045683	0.0705802	0.0363554		-0.40201	0.331658	9.40422	0.106335	0.0703518	2.91261e-06	0.00045683	0.0705802	0.0637571		0.0103134	0.331658	9.52323	0.105006	0.0703523	1.66057e-06	0.000456838	0.0705807	0.0363491		-0.080402	0	9.50033	0.10526
						-0.266811	0.331201	9.51265	0.105123	0.0726835	1.70329e-06	0.000490435	0.0729287	0.0347302		0	0.331201	9.52309	0.105008	0.0708086	1.66082e-06	0.00045683	0.071037	0.0363554		-0.40201	0.331201	9.40397	0.106338	0.0708086	2.91261e-06	0.00045683	0.071037	0.0637571		0.0103161	0.331201	9.52308	0.105008	0.0708091	1.6607e-06	0.000456838	0.0710376	0.0363522		-0.0808588	0	9.50032	0.10526
						-0.266989	0.330745	9.5125	0.105125	0.0731739	1.70545e-06	0.000491027	0.0734194	0.0347323		0	0.330745	9.52294	0.10501	0.0712654	1.66082e-06	0.00045683	0.0714938	0.0363554		-0.40201	0.330745	9.40371	0.106341	0.0712654	2.91261e-06	0.00045683	0.0714938	0.0637571		0.0103188	0.330745	9.52293	0.10501	0.071266	1.6607e-06	0.000456838	0.0714944	0.0363522		-0.0813157	0	9.50032	0.10526
						-0.267169	0.330288	9.51235	0.105127	0.073665	1.70765e-06	0.000491634	0.0739108	0.0347342		0	0.330288	9.52279	0.105011	0.0717222	1.66082e-06	0.00045683	0.0719507	0.0363554		-0.40201	0.330288	9.40345	0.106344	0.0717222	2.91261e-06	0.00045683	0.0719507	0.0637571		0.0103216	0.330288	9.52278	0.105011	0.0717228	1.66071e-06	0.000456838	0.0719512	0.0363522		-0.0817725	0	9.50031	0.10526
						-0.267351	0.329831	9.51219	0.105128	0.0741566	1.70989e-06	0.000492257	0.0744027	0.0347357		0	0.329831	9.52264	0.105013	0.0721791	1.66082e-06	0.00045683	0.0724075	0.0363554		-0.40201	0.329831	9.40319	0.106347	0.0721791	2.91261e-06	0.00045683	0.0724075	0.0637571		0.0103243	0.329831	9.52263	0.105013	0.0721796	1.66071e-06	0.000456838	0.0724081	0.0363522		-0.0822293	0	9.50031	0.10526
						-0.267534	0.329374	9.51204	0.10513	0.0746488	1.71217e-06	0.000492897	0.0748953	0.0347369		0	0.329374	9.52249	0.105015	0.0726359	1.66082e-06	0.00045683	0.0728643	0.0363554		-0.40201	0.329374	9.40294	0.10635	0.0726359	2.91261e-06	0.00045683	0.0728643	0.0637571		0.0103271	0.329374	9.52248	0.105015	0.0726365	1.66071e-06	0.000456838	0.0728649	0.0363522		-0.0826862	0	9.5003	0.10526
						-0.267719	0.328917	9.51188	0.105132	0.0751417	1.7145e-06	0.000493555	0.0753885	0.0347378		0	0.328917	9.52234	0.105016	0.0730927	1.66082e-06	0.00045683	0.0733212	0.0363554		-0.40201	0.328917	9.40268	0.106353	0.0730927	2.91261e-06	0.00045683	0.0733212	0.0637571		0.0103299	0.328917	9.52233	0.105016	0.0730933	1.66071e-06	0.000456838	0.0733217	0.0363522		-0.083143	0	9.5003	0.10526
						-0.267906	0.32846	9.51173	0.105133	0.0756353	1.7098e-06	0.000494231	0.0758824	0.0345952		0	0.32846	9.52219	0.105018	0.0735496	1.66082e-06	0.00045683	0.073778	0.0363554		-0.40201	0.32846	9.40242	0.106356	0.0735496	2.91261e-06	0.00045683	0.073778	0.0637571		0.0103327	0.32846	9.52218	0.105018	0.0735502	1.66071e-06	0.000456838	0.0737786	0.0363522		-0.0835998	0	9.5003	0.10526
						-0.268095	0.328004	9.51157	0.105135	0.0761295	1.70763e-06	0.000494925	0.076377	0.0345029		0	0.328004	9.52204	0.10502	0.0740064	1.66082e-06	0.00045683	0.0742348	0.0363554		-0.40201	0.328004	9.40216	0.106359	0.0740064	2.91261e-06	0.00045683	0.0742348	0.0637571		0.0103356	0.328004	9.52203	0.10502	0.074007	1.66071e-06	0.000456839	0.0742354	0.0363522		-0.0840566	0	9.50029	0.10526
						-0.268285	0.327547	9.51142	0.105137	0.0766244	1.71007e-06	0.000495639	0.0768723	0.0345023		0	0.327547	9.52189	0.105021	0.0744632	1.66082e-06	0.00045683	0.0746916	0.0363554		-0.40201	0.327547	9.40191	0.106361	0.0744632	2.91261e-06	0.00045683	0.0746916	0.0637571		0.0103384	0.327547	9.52187	0.105021	0.0744638	1.66071e-06	0.000456839	0.0746923	0.0363522		-0.0845135	0	9.50029	0.10526
						-0.268478	0.32709	9.51126	0.105139	0.0771201	1.71254e-06	0.000496373	0.0773683	0.0345012		0	0.32709	9.52173	0.105023	0.0749201	1.66082e-06	0.00045683	0.0751485	0.0363554		-0.40201	0.32709	9.40165	0.106364	0.0749201	2.79521e-06	0.00045683	0.0751485	0.0611871		0.0103413	0.32709	9.52172	0.105023	0.0749207	1.66071e-06	0.000456839	0.0751491	0.0363522		-0.0849703	0	9.50028	0.10526
						-0.268672	0.326633	9.51111	0.10514	0.0776165	1.59838e-06	0.000497127	0.077865	0.0321524		0	0.326633	9.52158	0.105025	0.0753769	1.53034e-06	0.00045683	0.0756053	0.0334992		-0.40201	0.326633	9.4014	0.106367	0.0753769	2.79521e-06	0.00045683	0.0756053	0.0611871		0.0103442	0.326633	9.52157	0.105025	0.0753775	1.53006e-06	0.000456839	0.0756059	0.0334924		-0.0854271	0	9.50028	0.10526
						-0.268868	0.326176	9.51096	0.105142	0.0781136	1.60077e-06	0.000497847	0.0783625	0.0321539		0	0.326176	9.52145	0.105026	0.0758337	1.53034e-06	0.00045683	0.0760621	0.0334992		-0.40201	0.326176	9.40115	0.10637	0.0758337	2.79521e-06	0.00045683	0.0760621	0.0611871		0.0103471	0.326176	9.52144	0.105026	0.0758344	1.53022e-06	0.000456839	0.0760628	0.0334959		-0.085884	0	9.50027	0.10526
						-0.269066	0.32572	9.51082	0.105143	0.0786114	1.60321e-06	0.000498586	0.0788607	0.0321552		0	0.32572	9.52131	0.105028	0.0762905	1.53034e-06	0.00045683	0.076519	0.0334992		-0.40201	0.32572	9.40091	0.106373	0.0762905	2.79521e-06	0.00045683	0.076519	0.0611871		0.01035	0.32572	9.5213	0.105028	0.0762912	1.53022e-06	0.000456839	0.0765196	0.0334959		-0.0863408	0	9.50027	0.10526
						-0.269265	0.325263	9.51067	0.105145	0.07911	1.60569e-06	0.000499345	0.0793597	0.032156		0	0.325263	9.52117	0.105029	0.0767474	1.53034e-06	0.00045683	0.0769758	0.0334992		-0.40201	0.325263	9.40066	0.106376	0.0767474	2.79521e-06	0.00045683	0.0769758	0.0611871		0.0103529	0.325263	9.52116	0.105029	0.076748	1.53022e-06	0.000456839	0.0769765	0.0334959		-0.0867976	0	9.50027	0.10526
						-0.269467	0.324806	9.51053	0.105147	0.0796094	1.59884e-06	0.000500123	0.0798594	0.0319689		0	0.324806	9.52103	0.105031	0.0772042	1.53034e-06	0.00045683	0.0774326	0.0334992		-0.40201	0.324806	9.40041	0.106378	0.0772042	2.79521e-06	0.00045683	0.0774326	0.0611871		0.0103559	0.324806	9.52102	0.105031	0.0772049	1.53022e-06	0.000456839	0.0774333	0.0334959		-0.0872545	0	9.50026	0.10526
						-0.269671	0.324349	9.51038	0.105148	0.0801095	1.6004e-06	0.000500923	0.08036	0.0319491		0	0.324349	9.52089	0.105032	0.077661	1.53034e-06	0.00045683	0.0778894	0.0334992		-0.40201	0.324349	9.40017	0.106381	0.077661	2.79521e-06	0.00045683	0.0778894	0.0611871		0.0103589	0.324349	9.52088	0.105032	0.0776617	1.53022e-06	0.000456839	0.0778901	0.0334959		-0.0877113	0	9.50026	0.10526
						-0.269876	0.323892	9.51024	0.10515	0.0806104	1.60299e-06	0.000501745	0.0808613	0.0319484		0	0.323892	9.52075	0.105034	0.0781179	1.53034e-06	0.00045683	0.0783463	0.0334992		-0.40201	0.323892	9.39992	0.106384	0.0781179	2.79521e-06	0.00045683	0.0783463	0.0611871		0.0103618	0.323892	9.52074	0.105034	0.0781185	1.53022e-06	0.000456839	0.078347	0.0334959		-0.0881681	0	9.50025	0.10526
						-0.270084	0.323435	9.51009	0.105151	0.0811122	1.60564e-06	0.000502589	0.0813635	0.0319473		0	0.323435	9.52061	0.105035	0.0785747	1.53034e-06	0.00045683	0.0788031	0.0334992		-0.40201	0.323435	9.39967	0.106387	0.0785747	2.79521e-06	0.00045683	0.0788031	0.0611871		0.0103648	0.323435	9.5206	0.105035	0.0785754	1.53022e-06	0.00045684	0.0788038	0.0334959		-0.0886249	0	9.50025	0.10526
						-0.270293	0.322979	9.50995	0.105153	0.0816147	1.60833e-06	0.000503456	0.0818665	0.0319458		0	0.322979	9.52047	0.105037	0.0790315	1.53034e-06	0.00045683	0.0792599	0.0334992		-0.40201	0.322979	9.39943	0.106389	0.0790315	2.79521e-06	0.00045683	0.0792599	0.0611871		0.0103678	0.322979	9.52046	0.105037	0.0790322	1.53022e-06	0.00045684	0.0792606	0.0334959		-0.0890818	0	9.50024	0.10526
						-0.270505	0.322522	9.5098	0.105155	0.0821182	1.61108e-06	0.000504348	0.0823704	0.0319438		0	0.322522	9.52034	0.105038	0.0794884	1.53034e-06	0.00045683	0.0797168	0.0334992		-0.40201	0.322522	9.39918	0.106392	0.0794884	2.79521e-06	0.00045683	0.0797168	0.0611871		0.0103709	0.322522	9.52033	0.105038	0.0794891	1.53023e-06	0.00045684	0.0797175	0.0334959		-0.0895386	0	9.50024	0.105261
						-0.270718	0.322065	9.50966	0.105156	0.0826226	1.61388e-06	0.000505264	0.0828752	0.0319412		0	0.322065	9.5202	0.10504	0.0799452	1.53034e-06	0.00045683	0.0801736	0.0334992		-0.40201	0.322065	9.39893	0.106395	0.0799452	2.79521e-06	0.00045683	0.0801736	0.0611871		0.0103739	0.322065	9.52019	0.10504	0.0799459	1.53023e-06	0.00045684	0.0801743	0.0334959		-0.0899954	0	9.50023	0.105261
						-0.270934	0.321608	9.50951	0.105158	0.0831278	1.50816e-06	0.000506206	0.0833809	0.0297935		0	0.321608	9.52006	0.105041	0.080402	1.41116e-06	0.00045683	0.0806304	0.0308904		-0.40201	0.321608	9.39868	0.106398	0.080402	2.66164e-06	0.00045683	0.0806304	0.0582632		0.010377	0.321608	9.52005	0.105041	0.0804027	1.41086e-06	0.00045684	0.0806312	0.0308831		-0.0904523	0	9.50023	0.105261
						-0.271152	0.321151	9.50938	0.105159	0.083634	1.50658e-06	0.000507107	0.0838876	0.0297093		0	0.321151	9.51993	0.105043	0.0808588	1.41116e-06	0.00045683	0.0810873	0.0308904		-0.40201	0.321151	9.39845	0.106401	0.0808588	2.66164e-06	0.00045683	0.0810873	0.0582632		0.01038	0.321151	9.51992	0.105043	0.0808596	1.41104e-06	0.00045684	0.081088	0.030887		-0.0909091	0	9.50022	0.105261
						-0.271372	0.320694	9.50924	0.105161	0.0841411	1.52971e-06	0.000508034	0.0843951	0.0301104		0	0.320694	9.5198	0.105044	0.0813157	1.41116e-06	0.00045683	0.0815441	0.0308904		-0.40201	0.320694	9.39821	0.106403	0.0813157	2.66164e-06	0.00045683	0.0815441	0.0582632		0.0103831	0.320694	9.51979	0.105044	0.0813164	1.41104e-06	0.00045684	0.0815448	0.030887		-0.0913659	0	9.50022	0.105261
						-0.271595	0.320238	9.5091	0.105162	0.0846492	1.53279e-06	0.000509009	0.0849037	0.0301131		0	0.320238	9.51967	0.105046	0.0817725	1.41116e-06	0.00045683	0.0820009	0.0308904		-0.40201	0.320238	9.39798	0.106406	0.0817725	2.66164e-06	0.00045683	0.0820009	0.0582632		0.0103862	0.320238	9.51966	0.105046	0.0817733	1.41104e-06	0.00045684	0.0820017	0.030887		-0.0918228	0	9.50021	0.105261
						-0.271819	0.319781	9.50896	0.105164	0.0851582	1.53592e-06	0.000510011	0.0854132	0.0301154		0	0.319781	9.51955	0.105047	0.0822293	1.41116e-06	0.00045683	0.0824577	0.0308904		-0.40201	0.319781	9.39774	0.106409	0.0822293	2.66164e-06	0.00045683	0.0824577	0.0582632		0.0103894	0.319781	9.51954	0.105047	0.0822301	1.41104e-06	0.00045684	0.0824585	0.030887		-0.0922796	0	9.50021	0.105261
						-0.272046	0.319324	9.50882	0.105165	0.0856682	1.53911e-06	0.000511041	0.0859237	0.0301172		0	0.319324	9.51942	0.105048	0.0826862	1.41116e-06	0.00045683	0.0829146	0.0308904		-0.40201	0.319324	9.39751	0.106411	0.0826862	2.66164e-06	0.00045683	0.0829146	0.0582632		0.0103925	0.319324	9.51941	0.105049	0.0826869	1.41105e-06	0.000456841	0.0829154	0.030887		-0.0927364	0	9.5002	0.105261
						-0.272275	0.318867	9.50868	0.105167	0.0861792	1.54237e-06	0.000512099	0.0864353	0.0301186		0	0.318867	9.51929	0.10505	0.083143	1.41116e-06	0.00045683	0.0833714	0.0308904		-0.40201	0.318867	9.39727	0.106414	0.083143	2.66164e-06	0.00045683	0.0833714	0.0582632		0.0103957	0.318867	9.51928	0.10505	0.0831438	1.41105e-06	0.000456841	0.0833722	0.030887		-0.0931932	0	9.5002	0.105261
						-0.272506	0.31841	9.50855	0.105169	0.0866913	1.54552e-06	0.000513187	0.0869479	0.0301162		0	0.31841	9.51916	0.105051	0.0835998	1.41116e-06	0.00045683	0.0838282	0.0308904		-0.40201	0.31841	9.39704	0.106417	0.0835998	2.66164e-06	0.00045683	0.0838282	0.0582632		0.0103988	0.31841	9.51915	0.105051	0.0836006	1.41105e-06	0.000456841	0.083829	0.030887		-0.0936501	0	9.50019	0.105261
						-0.27274	0.317953	9.50841	0.10517	0.0872045	1.54031e-06	0.000514305	0.0874617	0.0299493		0	0.317953	9.51904	0.105053	0.0840566	1.41116e-06	0.00045683	0.0842851	0.0308904		-0.40201	0.317953	9.3968	0.106419	0.0840566	2.66164e-06	0.00045683	0.0842851	0.0582632		0.010402	0.317953	9.51903	0.105053	0.0840575	1.41105e-06	0.000456841	0.0842859	0.030887		-0.0941069	0	9.50019	0.105261
						-0.272977	0.317497	9.50827	0.105172	0.0877188	1.54373e-06	0.000515455	0.0879765	0.0299489		0	0.317497	9.51891	0.105054	0.0845135	1.41116e-06	0.00045683	0.0847419	0.0308904		-0.40201	0.317497	9.39657	0.106422	0.0845135	2.66164e-06	0.00045683	0.0847419	0.0582632		0.0104053	0.317497	9.5189	0.105054	0.0845143	1.41105e-06	0.000456841	0.0847427	0.030887		-0.0945637	0	9.50018	0.105261
						-0.273215	0.31704	9.50813	0.105173	0.0882343	1.54722e-06	0.000516637	0.0884926	0.0299478		0	0.31704	9.51878	0.105055	0.0849703	1.41116e-06	0.00045683	0.0851987	0.0308904		-0.40201	0.31704	9.39633	0.106424	0.0849703	2.55356e-06	0.00045683	0.0851987	0.0558975		0.0104085	0.31704	9.51877	0.105056	0.0849712	1.41105e-06	0.000456841	0.0851996	0.030887		-0.0950206	0	9.50018	0.105261
						-0.273457	0.316583	9.50799	0.105175	0.0887509	1.45658e-06	0.000517854	0.0890098	0.0281272		0	0.316583	9.51865	0.105057	0.0854271	1.30227e-06	0.00045683	0.0856556	0.0285068		-0.40201	0.316583	9.39611	0.106427	0.0854271	2.55356e-06	0.00045683	0.0856556	0.0558975		0.0104117	0.316583	9.51864	0.105057	0.085428	1.30195e-06	0.000456841	0.0856564	0.0284991		-0.0954774	0	9.50017	0.105261
						-0.2737	0.316126	9.50785	0.105176	0.0892688	1.45997e-06	0.000519022	0.0895283	0.0281293		0	0.316126	9.51853	0.105058	0.085884	1.30227e-06	0.00045683	0.0861124	0.0285068		-0.40201	0.316126	9.39588	0.10643	0.085884	2.55356e-06	0.00045683	0.0861124	0.0558975		0.010415	0.316126	9.51852	0.105058	0.0858848	1.30216e-06	0.000456841	0.0861133	0.0285035		-0.0959342	0	9.50017	0.105261
						-0.273947	0.315669	9.50772	0.105178	0.0897878	1.46342e-06	0.000520221	0.0900479	0.0281308		0	0.315669	9.51842	0.10506	0.0863408	1.30227e-06	0.00045683	0.0865692	0.0285068		-0.40201	0.315669	9.39566	0.106432	0.0863408	2.55356e-06	0.00045683	0.0865692	0.0558975		0.0104183	0.315669	9.51841	0.10506	0.0863417	1.30216e-06	0.000456842	0.0865701	0.0285035		-0.096391	0	9.50016	0.105261
						-0.274196	0.315212	9.50759	0.105179	0.090308	1.46694e-06	0.000521453	0.0905687	0.0281318		0	0.315212	9.5183	0.105061	0.0867976	1.30227e-06	0.00045683	0.087026	0.0285068		-0.40201	0.315212	9.39543	0.106435	0.0867976	2.55356e-06	0.00045683	0.087026	0.0558975		0.0104216	0.315212	9.51829	0.105061	0.0867985	1.30216e-06	0.000456842	0.0870269	0.0285035		-0.0968479	0	9.50016	0.105261
						-0.274447	0.314756	9.50746	0.105181	0.0908295	1.46365e-06	0.000522718	0.0910908	0.0280007		0	0.314756	9.51818	0.105062	0.0872545	1.30227e-06	0.00045683	0.0874829	0.0285068		-0.40201	0.314756	9.39521	0.106437	0.0872545	2.55356e-06	0.00045683	0.0874829	0.0558975		0.0104249	0.314756	9.51817	0.105062	0.0872554	1.30216e-06	0.000456842	0.0874838	0.0285035		-0.0973047	0	9.50015	0.105261
						-0.274701	0.314299	9.50733	0.105182	0.0913522	1.46605e-06	0.000524018	0.0916142	0.0279771		0	0.314299	9.51806	0.105063	0.0877113	1.30227e-06	0.00045683	0.0879397	0.0285068		-0.40201	0.314299	9.39498	0.10644	0.0877113	2.55356e-06	0.00045683	0.0879397	0.0558975		0.0104283	0.314299	9.51805	0.105064	0.0877122	1.30216e-06	0.000456842	0.0879406	0.0285035		-0.0977615	0	9.50015	0.105262
						-0.274958	0.313842	9.50719	0.105184	0.0918762	1.46974e-06	0.000525354	0.0921389	0.0279763		0	0.313842	9.51794	0.105065	0.0881681	1.30227e-06	0.00045683	0.0883965	0.0285068		-0.40201	0.313842	9.39476	0.106442	0.0881681	2.55356e-06	0.00045683	0.0883965	0.0558975		0.0104317	0.313842	9.51793	0.105065	0.088169	1.30216e-06	0.000456842	0.0883975	0.0285035		-0.0982184	0	9.50014	0.105262
						-0.275217	0.313385	9.50706	0.105185	0.0924015	1.47351e-06	0.000526727	0.0926649	0.0279749		0	0.313385	9.51783	0.105066	0.0886249	1.30227e-06	0.00045683	0.0888534	0.0285068		-0.40201	0.313385	9.39453	0.106445	0.0886249	2.55356e-06	0.00045683	0.0888534	0.0558975		0.010435	0.313385	9.51782	0.105066	0.0886259	1.30216e-06	0.000456842	0.0888543	0.0285035		-0.0986752	0	9.50014	0.105262
						-0.27548	0.312928	9.50693	0.105186	0.0929283	1.47735e-06	0.000528138	0.0931923	0.0279729		0	0.312928	9.51771	0.105067	0.0890818	1.30227e-06	0.00045683	0.0893102	0.0285068		-0.40201	0.312928	9.39431	0.106447	0.0890818	2.55356e-06	0.00045683	0.0893102	0.0558975		0.0104384	0.312928	9.5177	0.105067	0.0890827	1.30216e-06	0.000456842	0.0893111	0.0285035		-0.099132	0	9.50013	0.105262
						-0.275745	0.312471	9.50679	0.105188	0.0934564	1.48127e-06	0.000529589	0.0937212	0.0279702		0	0.312471	9.51759	0.105069	0.0895386	1.30227e-06	0.00045683	0.089767	0.0285068		-0.40201	0.312471	9.39408	0.10645	0.0895386	2.55356e-06	0.00045683	0.089767	0.0558975		0.0104419	0.312471	9.51758	0.105069	0.0895396	1.30216e-06	0.000456843	0.089768	0.0285035		-0.0995889	0	9.50013	0.105262
						-0.276012	0.312015	9.50666	0.105189	0.093986	1.48527e-06	0.000531081	0.0942515	0.0279669		0	0.312015	9.51747	0.10507	0.0899954	1.30227e-06	0.00045683	0.0902238	0.0285068		-0.40201	0.312015	9.39385	0.106453	0.0899954	2.55356e-06	0.00045683	0.0902238	0.0558975		0.0104453	0.312015	9.51746	0.10507	0.0899964	1.30216e-06	0.000456843	0.0902248	0.0285035		-0.100046	0	9.50012	0.105262
						-0.276283	0.311558	9.50653	0.105191	0.0945171	1.41696e-06	0.000532616	0.0947834	0.0266038		0	0.311558	9.51735	0.105071	0.0904523	1.20274e-06	0.00045683	0.0906807	0.0263279		-0.40201	0.311558	9.39363	0.106455	0.0904523	2.43068e-06	0.00045683	0.0906807	0.0532076		0.0104488	0.311558	9.51734	0.105071	0.0904533	1.2024e-06	0.000456843	0.0906817	0.0263197		-0.100503	0	9.50012	0.105262
						-0.276557	0.311101	9.5064	0.105192	0.0950497	1.43068e-06	0.00053413	0.0953168	0.0267852		0	0.311101	9.51724	0.105072	0.0909091	1.20274e-06	0.00045683	0.0911375	0.0263279		-0.40201	0.311101	9.39341	0.106458	0.0909091	2.43068e-06	0.00045683	0.0911375	0.0532076		0.0104522	0.311101	9.51723	0.105073	0.0909101	1.20262e-06	0.000456843	0.0911385	0.0263246		-0.100959	0	9.50011	0.105262
						-0.276834	0.310644	9.50627	0.105194	0.0955838	1.43509e-06	0.000535704	0.0958517	0.0267888		0	0.310644	9.51714	0.105074	0.0913659	1.20274e-06	0.00045683	0.0915943	0.0263279		-0.40201	0.310644	9.3932	0.10646	0.0913659	2.43068e-06	0.00045683	0.0915943	0.0532076		0.0104557	0.310644	9.51713	0.105074	0.0913669	1.20262e-06	0.000456843	0.0915954	0.0263246		-0.101416	0	9.5001	0.105262
						-0.277114	0.310187	9.50614	0.105195	0.0961195	1.43958e-06	0.000537322	0.0963882	0.0267918		0	0.310187	9.51703	0.105075	0.0918228	1.20274e-06	0.00045683	0.0920512	0.0263279		-0.40201	0.310187	9.39299	0.106462	0.0918228	2.43068e-06	0.00045683	0.0920512	0.0532076		0.0104593	0.310187	9.51702	0.105075	0.0918238	1.20262e-06	0.000456843	0.0920522	0.0263246		-0.101873	0	9.5001	0.105262
						-0.277397	0.30973	9.50601	0.105197	0.0966569	1.44416e-06	0.000538984	0.0969263	0.0267941		0	0.30973	9.51692	0.105076	0.0922796	1.20274e-06	0.00045683	0.092508	0.0263279		-0.40201	0.30973	9.39277	0.106465	0.0922796	2.43068e-06	0.00045683	0.092508	0.0532076		0.0104628	0.30973	9.51691	0.105076	0.0922806	1.20262e-06	0.000456843	0.092509	0.0263246		-0.10233	0	9.50009	0.105262
						-0.277683	0.309274	9.50588	0.105198	0.0971958	1.44883e-06	0.000540692	0.0974662	0.0267959		0	0.309274	9.51681	0.105077	0.0927364	1.20274e-06	0.00045683	0.0929648	0.0263279		-0.40201	0.309274	9.39256	0.106467	0.0927364	2.43068e-06	0.00045683	0.0929648	0.0532076		0.0104664	0.309274	9.5168	0.105077	0.0927375	1.20262e-06	0.000456844	0.0929659	0.0263246		-0.102787	0	9.50009	0.105262
						-0.277972	0.308817	9.50575	0.1052	0.0977365	1.45316e-06	0.000542448	0.0980077	0.026789		0	0.308817	9.5167	0.105078	0.0931932	1.20274e-06	0.00045683	0.0934217	0.0263279		-0.40201	0.308817	9.39234	0.10647	0.0931932	2.43068e-06	0.00045683	0.0934217	0.0532076		0.0104699	0.308817	9.51669	0.105079	0.0931943	1.20262e-06	0.000456844	0.0934227	0.0263246		-0.103243	0	9.50008	0.105262
						-0.278264	0.30836	9.50562	0.105201	0.098279	1.45261e-06	0.000544253	0.0985511	0.02669		0	0.30836	9.51659	0.10508	0.0936501	1.20274e-06	0.00045683	0.0938785	0.0263279		-0.40201	0.30836	9.39213	0.106472	0.0936501	2.43068e-06	0.00045683	0.0938785	0.0532076		0.0104735	0.30836	9.51658	0.10508	0.0936512	1.20262e-06	0.000456844	0.0938796	0.0263246		-0.1037	0	9.50008	0.105262
						-0.27856	0.307903	9.50548	0.105202	0.0988232	1.45754e-06	0.000546109	0.0990963	0.0266896		0	0.307903	9.51648	0.105081	0.0941069	1.20274e-06	0.00045683	0.0943353	0.0263279		-0.40201	0.307903	9.39191	0.106475	0.0941069	2.43068e-06	0.00045683	0.0943353	0.0532076		0.0104771	0.307903	9.51647	0.105081	0.094108	1.20262e-06	0.000456844	0.0943364	0.0263246		-0.104157	0	9.50007	0.105262
						-0.278859	0.307446	9.50535	0.105204	0.0993693	1.46257e-06	0.000548018	0.0996433	0.0266883		0	0.307446	9.51637	0.105082	0.0945637	1.20274e-06	0.00045683	0.0947921	0.0263279		-0.40201	0.307446	9.3917	0.106477	0.0945637	2.43068e-06	0.00045683	0.0947921	0.0532076		0.0104808	0.307446	9.51636	0.105082	0.0945648	1.20262e-06	0.000456844	0.0947933	0.0263246		-0.104614	0	9.50006	0.105262
						-0.279162	0.306989	9.50522	0.105205	0.0999174	1.4677e-06	0.000549981	0.100192	0.0266863		0	0.306989	9.51626	0.105083	0.0950206	1.20274e-06	0.00045683	0.095249	0.0263279		-0.40201	0.306989	9.39148	0.106479	0.0950206	2.33135e-06	0.00045683	0.095249	0.0510332		0.0104844	0.306989	9.51625	0.105083	0.0950217	1.20262e-06	0.000456844	0.0952501	0.0263246		-0.105071	0	9.50006	0.105263
						-0.279468	0.306533	9.50509	0.105207	0.100467	1.39626e-06	0.000552	0.100743	0.0252946		0	0.306533	9.51616	0.105084	0.0954774	1.11168e-06	0.00045683	0.0957058	0.0243347		-0.40201	0.306533	9.39128	0.106482	0.0954774	2.33135e-06	0.00045683	0.0957058	0.0510332		0.0104881	0.306533	9.51615	0.105085	0.0954785	1.11133e-06	0.000456845	0.095707	0.0243262		-0.105528	0	9.50005	0.105263
						-0.279778	0.306076	9.50496	0.105208	0.101019	1.4013e-06	0.000553961	0.101296	0.0252961		0	0.306076	9.51605	0.105086	0.0959342	1.11168e-06	0.00045683	0.0961626	0.0243347		-0.40201	0.306076	9.39107	0.106484	0.0959342	2.33135e-06	0.00045683	0.0961626	0.0510332		0.0104918	0.306076	9.51605	0.105086	0.0959354	1.11175e-06	0.000456845	0.0961638	0.0243354		-0.105984	0	9.50005	0.105263
						-0.280092	0.305619	9.50484	0.10521	0.101573	1.40432e-06	0.000555975	0.101851	0.0252587		0	0.305619	9.51595	0.105087	0.096391	1.11168e-06	0.00045683	0.0966195	0.0243347		-0.40201	0.305619	9.39087	0.106486	0.096391	2.33135e-06	0.00045683	0.0966195	0.0510332		0.0104955	0.305619	9.51594	0.105087	0.0963922	1.11175e-06	0.000456845	0.0966206	0.0243354		-0.106441	0	9.50004	0.105263
						-0.280408	0.305162	9.50471	0.105211	0.102129	1.40725e-06	0.000558044	0.102408	0.0252175		0	0.305162	9.51585	0.105088	0.0968479	1.11168e-06	0.00045683	0.0970763	0.0243347		-0.40201	0.305162	9.39066	0.106489	0.0968479	2.33135e-06	0.00045683	0.0970763	0.0510332		0.0104993	0.305162	9.51584	0.105088	0.0968491	1.11175e-06	0.000456845	0.0970775	0.0243354		-0.106898	0	9.50003	0.105263
						-0.280729	0.304705	9.50458	0.105212	0.102687	1.41257e-06	0.000560169	0.102967	0.0252168		0	0.304705	9.51575	0.105089	0.0973047	1.11168e-06	0.00045683	0.0975331	0.0243347		-0.40201	0.304705	9.39046	0.106491	0.0973047	2.33135e-06	0.00045683	0.0975331	0.0510332		0.010503	0.304705	9.51574	0.105089	0.0973059	1.11175e-06	0.000456845	0.0975343	0.0243354		-0.107355	0	9.50003	0.105263
						-0.281053	0.304249	9.50445	0.105214	0.103247	1.41799e-06	0.000562353	0.103529	0.0252153		0	0.304249	9.51565	0.10509	0.0977615	1.11168e-06	0.00045683	0.0979899	0.0243347		-0.40201	0.304249	9.39025	0.106493	0.0977615	2.33135e-06	0.00045683	0.0979899	0.0510332		0.0105068	0.304249	9.51564	0.10509	0.0977628	1.11175e-06	0.000456845	0.0979912	0.0243354		-0.107812	0	9.50002	0.105263
						-0.281381	0.303792	9.50433	0.105215	0.10381	1.45828e-06	0.000564597	0.104092	0.0258287		0	0.303792	9.51555	0.105091	0.0982184	1.11168e-06	0.00045683	0.0984468	0.0243347		-0.40201	0.303792	9.39005	0.106496	0.0982184	2.33135e-06	0.00045683	0.0984468	0.0510332		0.0105106	0.303792	9.51554	0.105091	0.0982196	1.11175e-06	0.000456846	0.098448	0.0243354		-0.108269	0	9.50002	0.105263
						-0.281713	0.303335	9.50419	0.105217	0.104374	1.46755e-06	0.000566989	0.104658	0.0258832		0	0.303335	9.51545	0.105092	0.0986752	1.11168e-06	0.00045683	0.0989036	0.0243347		-0.40201	0.303335	9.38984	0.106498	0.0986752	2.33135e-06	0.00045683	0.0989036	0.0510332		0.0105144	0.303335	9.51544	0.105092	0.0986764	1.11175e-06	0.000456846	0.0989049	0.0243354		-0.108725	0	9.50001	0.105263
						-0.282049	0.302878	9.50406	0.105218	0.104941	1.47376e-06	0.000569456	0.105226	0.0258801		0	0.302878	9.51535	0.105093	0.099132	1.11168e-06	0.00045683	0.0993604	0.0243347		-0.40201	0.302878	9.38963	0.1065	0.099132	2.33135e-06	0.00045683	0.0993604	0.0510332		0.0105183	0.302878	9.51534	0.105093	0.0991333	1.11175e-06	0.000456846	0.0993617	0.0243354		-0.109182	0	9.5	0.105263
						-0.282389	0.302421	9.50393	0.10522	0.105511	1.47764e-06	0.000571994	0.105797	0.0258332		0	0.302421	9.51525	0.105094	0.0995889	1.11168e-06	0.00045683	0.0998173	0.0243347		-0.40201	0.302421	9.38943	0.106503	0.0995889	2.33135e-06	0.00045683	0.0998173	0.0510332		0.0105221	0.302421	9.51524	0.105095	0.0995901	1.11175e-06	0.000456846	0.0998186	0.0243354		-0.109639	0	9.5	0.105263
						-0.282733	0.301964	9.50379	0.105221	0.106083	1.48435e-06	0.000574605	0.10637	0.0258326		0	0.301964	9.51515	0.105096	0.100046	1.11168e-06	0.00045683	0.100274	0.0243347		-0.40201	0.301964	9.38922	0.106505	0.100046	2.33135e-06	0.00045683	0.100274	0.0510332		0.010526	0.301964	9.51514	0.105096	0.100047	1.11175e-06	0.000456846	0.100275	0.0243354		-0.110096	0	9.49999	0.105263
						-0.283081	0.301508	9.50366	0.105223	0.106657	1.42175e-06	0.000577292	0.106946	0.024628		0	0.301508	9.51505	0.105097	0.100503	1.02832e-06	0.00045683	0.100731	0.0225099		-0.40201	0.301508	9.38902	0.106507	0.100503	2.21851e-06	0.00045683	0.100731	0.0485632		0.0105299	0.301508	9.51504	0.105097	0.100504	1.02796e-06	0.000456846	0.100732	0.0225011		-0.110553	0	9.49998	0.105263
						-0.283434	0.301051	9.50353	0.105224	0.107235	1.42839e-06	0.000579914	0.107525	0.024631		0	0.301051	9.51496	0.105098	0.100959	1.02832e-06	0.00045683	0.101188	0.0225099		-0.40201	0.301051	9.38882	0.10651	0.100959	2.21851e-06	0.00045683	0.101188	0.0485632		0.0105338	0.301051	9.51495	0.105098	0.100961	1.02819e-06	0.000456847	0.101189	0.0225063		-0.11101	0	9.49998	0.105263
						-0.283792	0.300594	9.5034	0.105225	0.107815	1.43516e-06	0.000582608	0.108106	0.0246333		0	0.300594	9.51486	0.105099	0.101416	1.02832e-06	0.00045683	0.101645	0.0225099		-0.40201	0.300594	9.38863	0.106512	0.101416	2.21851e-06	0.00045683	0.101645	0.0485632		0.0105378	0.300594	9.51485	0.105099	0.101418	1.02821e-06	0.000456847	0.101646	0.0225066		-0.111466	0	9.49997	0.105263
						-0.284153	0.300137	9.50327	0.105227	0.108397	1.44206e-06	0.000585376	0.10869	0.0246347		0	0.300137	9.51477	0.1051	0.101873	1.02832e-06	0.00045683	0.102101	0.0225099		-0.40201	0.300137	9.38843	0.106514	0.101873	2.21851e-06	0.00045683	0.102101	0.0485632		0.0105417	0.300137	9.51476	0.1051	0.101874	1.02821e-06	0.000456847	0.102103	0.0225066		-0.111923	0	9.49996	0.105264
						-0.284519	0.29968	9.50314	0.105228	0.108983	1.44725e-06	0.00058822	0.109277	0.0246039		0	0.29968	9.51468	0.105101	0.10233	1.02832e-06	0.00045683	0.102558	0.0225099		-0.40201	0.29968	9.38824	0.106516	0.10233	2.21851e-06	0.00045683	0.102558	0.0485632		0.0105457	0.29968	9.51467	0.105101	0.102331	1.02821e-06	0.000456847	0.10256	0.0225066		-0.11238	0	9.49996	0.105264
						-0.28489	0.299223	9.50301	0.10523	0.109571	1.4542e-06	0.000591143	0.109866	0.0245999		0	0.299223	9.51458	0.105102	0.102787	1.02832e-06	0.00045683	0.103015	0.0225099		-0.40201	0.299223	9.38804	0.106519	0.102787	2.21851e-06	0.00045683	0.103015	0.0485632		0.0105497	0.299223	9.51457	0.105102	0.102788	1.02821e-06	0.000456847	0.103016	0.0225066		-0.112837	0	9.49995	0.105264
						-0.285265	0.298767	9.50288	0.105231	0.110162	1.46152e-06	0.000594146	0.110459	0.0245986		0	0.298767	9.51449	0.105103	0.103243	1.02832e-06	0.00045683	0.103472	0.0225099		-0.40201	0.298767	9.38784	0.106521	0.103243	2.21851e-06	0.00045683	0.103472	0.0485632		0.0105537	0.298767	9.51448	0.105103	0.103245	1.02821e-06	0.000456848	0.103473	0.0225066		-0.113294	0	9.49994	0.105264
						-0.285645	0.29831	9.50275	0.105233	0.110756	1.46898e-06	0.000597234	0.111055	0.0245963		0	0.29831	9.5144	0.105104	0.1037	1.02832e-06	0.00045683	0.103929	0.0225099		-0.40201	0.29831	9.38765	0.106523	0.1037	2.21851e-06	0.00045683	0.103929	0.0485632		0.0105578	0.29831	9.51439	0.105104	0.103702	1.02821e-06	0.000456848	0.10393	0.0225066		-0.113751	0	9.49994	0.105264
						-0.286029	0.297853	9.50262	0.105234	0.111353	1.47659e-06	0.000600408	0.111654	0.0245931		0	0.297853	9.5143	0.105105	0.104157	1.02832e-06	0.00045683	0.104386	0.0225099		-0.40201	0.297853	9.38745	0.106525	0.104157	2.21851e-06	0.00045683	0.104386	0.0485632		0.0105619	0.297853	9.51429	0.105105	0.104159	1.02821e-06	0.000456848	0.104387	0.0225066		-0.114207	0	9.49993	0.105264
						-0.286419	0.297396	9.50248	0.105236	0.111954	1.5319e-06	0.000603671	0.112256	0.0253764		0	0.297396	9.51421	0.105106	0.104614	1.02832e-06	0.00045683	0.104842	0.0225099		-0.40201	0.297396	9.38726	0.106527	0.104614	2.21851e-06	0.00045683	0.104842	0.0485632		0.0105659	0.297396	9.5142	0.105106	0.104615	1.02821e-06	0.000456848	0.104844	0.0225066		-0.114664	0	9.49992	0.105264
						-0.286814	0.296939	9.50235	0.105237	0.112557	1.54241e-06	0.000607177	0.112861	0.025403		0	0.296939	9.51412	0.105107	0.105071	1.02832e-06	0.00045683	0.105299	0.0225099		-0.40201	0.296939	9.38706	0.10653	0.105071	2.21851e-06	0.00045683	0.105299	0.0485632		0.0105701	0.296939	9.51411	0.105107	0.105072	1.02821e-06	0.000456848	0.105301	0.0225066		-0.115121	0	9.49992	0.105264
						-0.287214	0.296482	9.50221	0.105239	0.113165	1.48821e-06	0.000610791	0.11347	0.0243652		0	0.296482	9.51402	0.105108	0.105528	9.51935e-07	0.00045683	0.105756	0.0208379		-0.40201	0.296482	9.38687	0.106532	0.105528	2.11912e-06	0.00045683	0.105756	0.0463875		0.0105742	0.296482	9.51401	0.105108	0.105529	9.5158e-07	0.000456849	0.105758	0.0208292		-0.115578	0	9.49991	0.105264
						-0.287619	0.296026	9.50207	0.10524	0.113775	1.49714e-06	0.000614342	0.114083	0.0243697		0	0.296026	9.51394	0.105109	0.105984	9.51935e-07	0.00045683	0.106213	0.0208379		-0.40201	0.296026	9.38668	0.106534	0.105984	2.11912e-06	0.00045683	0.106213	0.0463875		0.0105783	0.296026	9.51393	0.105109	0.105986	9.5179e-07	0.000456849	0.106214	0.0208338		-0.116035	0	9.4999	0.105264
						-0.28803	0.295569	9.50194	0.105242	0.11439	1.50624e-06	0.000617991	0.114699	0.0243732		0	0.295569	9.51385	0.10511	0.106441	9.51935e-07	0.00045683	0.10667	0.0208379		-0.40201	0.295569	9.38649	0.106536	0.106441	2.11912e-06	0.00045683	0.10667	0.0463875		0.0105825	0.295569	9.51384	0.10511	0.106443	9.5183e-07	0.000456849	0.106671	0.0208347		-0.116492	0	9.4999	0.105264
						-0.288446	0.295112	9.5018	0.105243	0.115008	1.51554e-06	0.00062174	0.115319	0.0243757		0	0.295112	9.51377	0.105111	0.106898	9.51935e-07	0.00045683	0.107127	0.0208379		-0.40201	0.295112	9.38631	0.106538	0.106898	2.11912e-06	0.00045683	0.107127	0.0463875		0.0105867	0.295112	9.51376	0.105111	0.1069	9.5183e-07	0.000456849	0.107128	0.0208347		-0.116948	0	9.49989	0.105264
						-0.288868	0.294655	9.50166	0.105245	0.11563	1.52524e-06	0.000625592	0.115942	0.0243808		0	0.294655	9.51368	0.105112	0.107355	9.51935e-07	0.00045683	0.107583	0.0208379		-0.40201	0.294655	9.38612	0.10654	0.107355	2.11912e-06	0.00045683	0.107583	0.0463875		0.010591	0.294655	9.51367	0.105112	0.107357	9.51831e-07	0.000456849	0.107585	0.0208347		-0.117405	0	9.49988	0.105264
						-0.289295	0.294198	9.50153	0.105246	0.116255	1.53633e-06	0.00062955	0.11657	0.0244037		0	0.294198	9.51359	0.105113	0.107812	9.51935e-07	0.00045683	0.10804	0.0208379		-0.40201	0.294198	9.38593	0.106542	0.107812	2.11912e-06	0.00045683	0.10804	0.0463875		0.0105952	0.294198	9.51358	0.105113	0.107813	9.51831e-07	0.00045685	0.108042	0.0208347		-0.117862	0	9.49987	0.105265
						-0.289728	0.293741	9.50139	0.105248	0.116885	1.54621e-06	0.000633618	0.117201	0.0244029		0	0.293741	9.51351	0.105114	0.108269	9.51935e-07	0.00045683	0.108497	0.0208379		-0.40201	0.293741	9.38575	0.106545	0.108269	2.11912e-06	0.00045683	0.108497	0.0463875		0.0105995	0.293741	9.5135	0.105114	0.10827	9.51832e-07	0.00045685	0.108499	0.0208347		-0.118319	0	9.49987	0.105265
						-0.290167	0.293285	9.50125	0.105249	0.117518	1.55629e-06	0.000637798	0.117837	0.024401		0	0.293285	9.51342	0.105115	0.108725	9.51935e-07	0.00045683	0.108954	0.0208379		-0.40201	0.293285	9.38556	0.106547	0.108725	2.11912e-06	0.00045683	0.108954	0.0463875		0.0106037	0.293285	9.51341	0.105115	0.108727	9.51832e-07	0.00045685	0.108956	0.0208347		-0.118776	0	9.49986	0.105265
						-0.290613	0.292828	9.50111	0.105251	0.118156	1.56658e-06	0.000642093	0.118477	0.024398		0	0.292828	9.51334	0.105116	0.109182	9.51935e-07	0.00045683	0.109411	0.0208379		-0.40201	0.292828	9.38537	0.106549	0.109182	2.11912e-06	0.00045683	0.109411	0.0463875		0.0106081	0.292828	9.51333	0.105116	0.109184	9.51833e-07	0.00045685	0.109412	0.0208347		-0.119233	0	9.49985	0.105265
						-0.291064	0.292371	9.50097	0.105252	0.118798	1.5836e-06	0.000645602	0.119121	0.0245291		0	0.292371	9.51325	0.105117	0.109639	9.51935e-07	0.00045683	0.109868	0.0208379		-0.40201	0.292371	9.38519	0.106551	0.109639	2.11912e-06	0.00045683	0.109868	0.0463875		0.0106124	0.292371	9.51324	0.105117	0.109641	9.51833e-07	0.00045685	0.109869	0.0208347		-0.119689	0	9.49985	0.105265
						-0.291521	0.291915	9.50082	0.105254	0.119444	1.62889e-06	0.00064115	0.119764	0.0254057		0	0.291914	9.51316	0.105118	0.110096	9.51935e-07	0.00045683	0.110324	0.0208379		-0.40201	0.291914	9.385	0.106553	0.110096	2.11912e-06	0.00045683	0.110324	0.0463875		0.0106168	0.291914	9.51315	0.105118	0.110098	9.51834e-07	0.000456851	0.110326	0.0208347		-0.120146	0	9.49984	0.105265
						-0.291977	0.291465	9.50068	0.105256	0.120085	1.56344e-06	0.000636622	0.120403	0.0245583		0	0.291457	9.51308	0.105118	0.110553	8.8188e-07	0.00045683	0.110781	0.0193043		-0.40201	0.291457	9.38481	0.106555	0.110553	2.024e-06	0.00045683	0.110781	0.0443054		0.0106211	0.291457	9.51307	0.105119	0.110554	8.81534e-07	0.000456851	0.110783	0.0192959		-0.120603	0	9.49983	0.105265
						-0.292434	0.291021	9.50053	0.105257	0.120722	1.55243e-06	0.0006324	0.121038	0.0245482		0	0.291	9.513	0.105119	0.11101	8.8188e-07	0.00045683	0.111238	0.0193043		-0.40201	0.291	9.38464	0.106557	0.11101	2.024e-06	0.00045683	0.111238	0.0443054		0.0106255	0.291	9.51299	0.105119	0.111011	8.81716e-07	0.000456851	0.11124	0.0192999		-0.12106	0	9.49982	0.105265
						-0.292891	0.290584	9.50039	0.105259	0.121354	1.54261e-06	0.0006283	0.121668	0.0245522		0	0.290544	9.51292	0.10512	0.111466	8.8188e-07	0.00045683	0.111695	0.0193043		-0.40201	0.290544	9.38446	0.106559	0.111466	2.024e-06	0.00045683	0.111695	0.0443054		0.01063	0.290544	9.51291	0.10512	0.111468	8.8178e-07	0.000456851	0.111697	0.0193013		-0.121517	0	9.49982	0.105265
						-0.293348	0.290153	9.50026	0.10526	0.121982	1.53301e-06	0.000624316	0.122294	0.024555		0	0.290087	9.51284	0.105121	0.111923	8.8188e-07	0.00045683	0.112152	0.0193043		-0.40201	0.290087	9.38428	0.106561	0.111923	2.024e-06	0.00045683	0.112152	0.0443054		0.0106344	0.290087	9.51283	0.105121	0.111925	8.81781e-07	0.000456851	0.112153	0.0193013		-0.121974	0	9.49981	0.105265
						-0.293805	0.289727	9.50012	0.105262	0.122607	1.52361e-06	0.000620446	0.122917	0.0245567		0	0.28963	9.51276	0.105122	0.11238	8.8188e-07	0.00045683	0.112608	0.0193043		-0.40201	0.28963	9.3841	0.106563	0.11238	2.024e-06	0.00045683	0.112608	0.0443054		0.0106389	0.28963	9.51275	0.105122	0.112382	8.81781e-07	0.000456852	0.11261	0.0193013		-0.12243	0	9.4998	0.105265
						-0.294262	0.289307	9.49998	0.105263	0.123227	1.51922e-06	0.000616685	0.123535	0.0246353		0	0.289173	9.51268	0.105123	0.112837	8.8188e-07	0.00045683	0.113065	0.0193043		-0.40201	0.289173	9.38392	0.106565	0.112837	2.024e-06	0.00045683	0.113065	0.0443054		0.0106434	0.289173	9.51267	0.105123	0.112839	8.81782e-07	0.000456852	0.113067	0.0193013		-0.122887	0	9.49979	0.105265
						-0.294718	0.288893	9.49984	0.105265	0.123844	1.5106e-06	0.000613029	0.12415	0.0246416		0	0.288716	9.5126	0.105124	0.113294	8.8188e-07	0.00045683	0.113522	0.0193043		-0.40201	0.288716	9.38374	0.106567	0.113294	2.024e-06	0.00045683	0.113522	0.0443054		0.0106479	0.288716	9.51259	0.105124	0.113296	8.81782e-07	0.000456852	0.113524	0.0193013		-0.123344	0	9.49979	0.105266
						-0.295175	0.288484	9.49971	0.105266	0.124457	1.50175e-06	0.000609476	0.124761	0.02464		0	0.288259	9.51252	0.105125	0.113751	8.8188e-07	0.00045683	0.113979	0.0193043		-0.40201	0.288259	9.38357	0.106569	0.113751	2.024e-06	0.00045683	0.113979	0.0443054		0.0106524	0.288259	9.51251	0.105125	0.113752	8.81783e-07	0.000456852	0.113981	0.0193013		-0.123801	0	9.49978	0.105266
						-0.295632	0.288081	9.49957	0.105268	0.125066	1.49308e-06	0.000606023	0.125369	0.0246374		0	0.287803	9.51244	0.105126	0.114207	8.8188e-07	0.00045683	0.114436	0.0193043		-0.40201	0.287803	9.38339	0.106571	0.114207	2.024e-06	0.00045683	0.114436	0.0443054		0.010657	0.287803	9.51243	0.105126	0.114209	8.81783e-07	0.000456853	0.114438	0.0193013		-0.124258	0	9.49977	0.105266
						-0.296089	0.287683	9.49944	0.105269	0.125672	1.49437e-06	0.000602666	0.125974	0.024796		0	0.287346	9.51236	0.105126	0.114664	8.8188e-07	0.00045683	0.114893	0.0193043		-0.40201	0.287346	9.38321	0.106573	0.114664	2.024e-06	0.00045683	0.114893	0.0443054		0.0106616	0.287346	9.51235	0.105127	0.114666	8.81784e-07	0.000456853	0.114895	0.0193013		-0.124714	0	9.49976	0.105266
						-0.296546	0.28729	9.4993	0.105271	0.126275	1.54727e-06	0.000599375	0.126575	0.0258147		0	0.286889	9.51228	0.105127	0.115121	8.8188e-07	0.00045683	0.115349	0.0193043		-0.40201	0.286889	9.38303	0.106575	0.115121	2.024e-06	0.00045683	0.115349	0.0443054		0.0106662	0.286889	9.51227	0.105127	0.115123	8.81784e-07	0.000456853	0.115351	0.0193013		-0.125171	0	9.49975	0.105266
						-0.297003	0.286902	9.49916	0.105272	0.126874	1.54586e-06	0.000596009	0.127172	0.0259368		0	0.286432	9.5122	0.105128	0.115578	8.17567e-07	0.00045683	0.115806	0.0178965		-0.40201	0.286432	9.38285	0.106577	0.115578	1.93302e-06	0.00045683	0.115806	0.0423137		0.0106708	0.286432	9.51219	0.105128	0.11558	8.17232e-07	0.000456853	0.115808	0.0178883		-0.125628	0	9.49975	0.105266
						-0.297459	0.286519	9.49902	0.105274	0.12747	1.50285e-06	0.000592743	0.127767	0.0253541		0	0.285975	9.51212	0.105129	0.116035	8.17567e-07	0.00045683	0.116263	0.0178965		-0.40201	0.285975	9.38268	0.106579	0.116035	1.93302e-06	0.00045683	0.116263	0.0423137		0.0106755	0.285975	9.51212	0.105129	0.116037	8.17384e-07	0.000456854	0.116265	0.0178916		-0.126085	0	9.49974	0.105266
						-0.297916	0.286141	9.49889	0.105276	0.128063	1.48505e-06	0.000589658	0.128358	0.0251849		0	0.285519	9.51205	0.10513	0.116492	8.17567e-07	0.00045683	0.11672	0.0178965		-0.40201	0.285519	9.38251	0.106581	0.116492	1.93302e-06	0.00045683	0.11672	0.0423137		0.0106802	0.285519	9.51204	0.10513	0.116494	8.17474e-07	0.000456854	0.116722	0.0178936		-0.126542	0	9.49973	0.105266
						-0.298373	0.285768	9.49875	0.105277	0.128653	1.47775e-06	0.000586686	0.128946	0.0251881		0	0.285062	9.51198	0.105131	0.116948	8.17567e-07	0.00045683	0.117177	0.0178965		-0.40201	0.285062	9.38234	0.106583	0.116948	1.93302e-06	0.00045683	0.117177	0.0423137		0.0106849	0.285062	9.51197	0.105131	0.11695	8.17474e-07	0.000456854	0.117179	0.0178936		-0.126999	0	9.49972	0.105266
						-0.29883	0.2854	9.49862	0.105278	0.129239	1.47061e-06	0.000583799	0.129531	0.0251904		0	0.284605	9.5119	0.105131	0.117405	8.17567e-07	0.00045683	0.117634	0.0178965		-0.40201	0.284605	9.38217	0.106585	0.117405	1.93302e-06	0.00045683	0.117634	0.0423137		0.0106896	0.284605	9.51189	0.105132	0.117407	8.17475e-07	0.000456854	0.117636	0.0178936		-0.127455	0	9.49971	0.105266
						-0.299287	0.285037	9.49849	0.10528	0.129823	1.46362e-06	0.000580994	0.130114	0.0251916		0	0.284148	9.51183	0.105132	0.117862	8.17567e-07	0.00045683	0.11809	0.0178965		-0.40201	0.284148	9.382	0.106587	0.117862	1.93302e-06	0.00045683	0.11809	0.0423137		0.0106944	0.284148	9.51182	0.105132	0.117864	8.17475e-07	0.000456855	0.118093	0.0178936		-0.127912	0	9.4997	0.105266
						-0.299743	0.284678	9.49835	0.105281	0.130404	1.46474e-06	0.000578269	0.130693	0.0253298		0	0.283691	9.51175	0.105133	0.118319	8.17567e-07	0.00045683	0.118547	0.0178965		-0.40201	0.283691	9.38183	0.106589	0.118319	1.93302e-06	0.00045683	0.118547	0.0423137		0.0106992	0.283691	9.51175	0.105133	0.118321	8.17476e-07	0.000456855	0.118549	0.0178936		-0.128369	0	9.4997	0.105267
						-0.3002	0.284323	9.49822	0.105283	0.130982	1.45809e-06	0.000575621	0.13127	0.0253308		0	0.283234	9.51168	0.105134	0.118776	8.17567e-07	0.00045683	0.119004	0.0178965		-0.40201	0.283234	9.38166	0.106591	0.118776	1.93302e-06	0.00045683	0.119004	0.0423137		0.010704	0.283234	9.51167	0.105134	0.118778	8.17476e-07	0.000456855	0.119006	0.0178936		-0.128826	0	9.49969	0.105267
						-0.300657	0.283973	9.49809	0.105284	0.131558	1.45149e-06	0.000573047	0.131845	0.0253293		0	0.282778	9.51161	0.105135	0.119233	8.17567e-07	0.00045683	0.119461	0.0178965		-0.40201	0.282778	9.38149	0.106593	0.119233	1.93302e-06	0.00045683	0.119461	0.0423137		0.0107088	0.282778	9.5116	0.105135	0.119235	8.17477e-07	0.000456855	0.119463	0.0178936		-0.129283	0	9.49968	0.105267
						-0.301114	0.283627	9.49796	0.105286	0.132131	1.45607e-06	0.000570546	0.132416	0.0255206		0	0.282321	9.51153	0.105136	0.119689	8.17567e-07	0.00045683	0.119918	0.0178965		-0.40201	0.282321	9.38132	0.106595	0.119689	1.93302e-06	0.00045683	0.119918	0.0423137		0.0107137	0.282321	9.51152	0.105136	0.119692	8.17478e-07	0.000456856	0.11992	0.0178936		-0.12974	0	9.49967	0.105267
						-0.301571	0.283285	9.49783	0.105287	0.132702	1.51843e-06	0.00056809	0.132986	0.0267286		0	0.281864	9.51146	0.105136	0.120146	8.17567e-07	0.00045683	0.120375	0.0178965		-0.40201	0.281864	9.38115	0.106597	0.120146	1.76914e-06	0.00045683	0.120375	0.0387264		0.0107185	0.281864	9.51145	0.105136	0.120148	8.17478e-07	0.000456856	0.120377	0.0178936		-0.130196	0	9.49966	0.105267
						-0.302028	0.282948	9.49769	0.105289	0.13327	1.51178e-06	0.000565561	0.133553	0.0267306		0	0.281407	9.51139	0.105137	0.120603	7.58468e-07	0.00045683	0.120831	0.0166029		-0.40201	0.281407	9.381	0.106598	0.120603	1.76914e-06	0.00045683	0.120831	0.0387264		0.0107235	0.281407	9.51138	0.105137	0.120605	7.58146e-07	0.000456856	0.120834	0.0165949		-0.130653	0	9.49966	0.105267
						-0.302484	0.282614	9.49755	0.10529	0.133835	1.51275e-06	0.000563108	0.134117	0.0268643		0	0.28095	9.51132	0.105138	0.12106	7.58468e-07	0.00045683	0.121288	0.0166029		-0.40201	0.28095	9.38084	0.1066	0.12106	1.76914e-06	0.00045683	0.121288	0.0387264		0.0107284	0.28095	9.51131	0.105138	0.121062	7.58267e-07	0.000456856	0.121291	0.0165975		-0.13111	0	9.49965	0.105267
						-0.302941	0.282285	9.49742	0.105292	0.134398	1.50943e-06	0.000560728	0.134679	0.0269191		0	0.280493	9.51125	0.105139	0.121517	7.58468e-07	0.00045683	0.121745	0.0166029		-0.40201	0.280493	9.38068	0.106602	0.121517	1.76914e-06	0.00045683	0.121745	0.0387264		0.0107333	0.280493	9.51124	0.105139	0.121519	7.58382e-07	0.000456857	0.121747	0.0166		-0.131567	0	9.49964	0.105267
						-0.303398	0.28196	9.49728	0.105293	0.134959	1.50316e-06	0.000558419	0.135238	0.0269181		0	0.280037	9.51118	0.105139	0.121974	7.58468e-07	0.00045683	0.122202	0.0166029		-0.40201	0.280037	9.38053	0.106604	0.121974	1.76914e-06	0.00045683	0.122202	0.0387264		0.0107383	0.280037	9.51117	0.10514	0.121976	7.58383e-07	0.000456857	0.122204	0.0166		-0.132024	0	9.49963	0.105267
						-0.303855	0.281639	9.49715	0.105295	0.135518	1.48747e-06	0.000556179	0.135796	0.0267444		0	0.27958	9.51111	0.10514	0.12243	7.58468e-07	0.00045683	0.122659	0.0166029		-0.40201	0.27958	9.38037	0.106606	0.12243	1.76914e-06	0.00045683	0.122659	0.0387264		0.0107433	0.27958	9.5111	0.10514	0.122433	7.58383e-07	0.000456857	0.122661	0.0166		-0.132481	0	9.49962	0.105267
						-0.304312	0.281321	9.49701	0.105296	0.136074	1.4561e-06	0.000554022	0.136351	0.0262824		0	0.279123	9.51104	0.105141	0.122887	7.58468e-07	0.00045683	0.123116	0.0166029		-0.40201	0.279123	9.38022	0.106607	0.122887	1.76914e-06	0.00045683	0.123116	0.0387264		0.0107484	0.279123	9.51103	0.105141	0.12289	7.58384e-07	0.000456858	0.123118	0.0166		-0.132937	0	9.49961	0.105267
						-0.304769	0.281008	9.49688	0.105298	0.136628	1.4508e-06	0.000551973	0.136904	0.026284		0	0.278666	9.51097	0.105142	0.123344	7.58468e-07	0.00045683	0.123572	0.0166029		-0.40201	0.278666	9.38006	0.106609	0.123344	1.76914e-06	0.00045683	0.123572	0.0387264		0.0107534	0.278666	9.51096	0.105142	0.123346	7.58385e-07	0.000456858	0.123575	0.0166		-0.133394	0	9.4996	0.105268
						-0.305225	0.280698	9.49675	0.105299	0.13718	1.44805e-06	0.000549982	0.137455	0.026329		0	0.278209	9.5109	0.105142	0.123801	7.58468e-07	0.00045683	0.124029	0.0166029		-0.40201	0.278209	9.37991	0.106611	0.123801	1.76914e-06	0.00045683	0.124029	0.0387264		0.0107585	0.278209	9.5109	0.105143	0.123803	7.58385e-07	0.000456858	0.124032	0.0166		-0.133851	0	9.49959	0.105268
						-0.305682	0.280392	9.49662	0.105301	0.13773	1.45177e-06	0.000548048	0.138004	0.0264898		0	0.277752	9.51084	0.105143	0.124258	7.58468e-07	0.00045683	0.124486	0.0166029		-0.40201	0.277752	9.37975	0.106613	0.124258	1.76914e-06	0.00045683	0.124486	0.0387264		0.0107636	0.277752	9.51083	0.105143	0.12426	7.58386e-07	0.000456858	0.124489	0.0166		-0.134308	0	9.49958	0.105268
						-0.306139	0.280089	9.49649	0.105302	0.138278	1.45935e-06	0.000546168	0.138551	0.0267198		0	0.277296	9.51077	0.105144	0.124714	7.58468e-07	0.00045683	0.124943	0.0166029		-0.40201	0.277296	9.3796	0.106614	0.124714	1.76914e-06	0.00045683	0.124943	0.0387264		0.0107687	0.277296	9.51076	0.105144	0.124717	7.58386e-07	0.000456859	0.124945	0.0166		-0.134765	0	9.49957	0.105268
						-0.306596	0.27979	9.49636	0.105304	0.138824	1.53282e-06	0.000544321	0.139096	0.0281602		0	0.276839	9.5107	0.105145	0.125171	7.58468e-07	0.00045683	0.1254	0.0166029		-0.40201	0.276839	9.37944	0.106616	0.125171	1.76914e-06	0.00045683	0.1254	0.0387264		0.0107739	0.276839	9.51069	0.105145	0.125174	7.58387e-07	0.000456859	0.125402	0.0166		-0.135222	0	9.49957	0.105268
						-0.307053	0.279494	9.49622	0.105305	0.139368	1.5276e-06	0.000542403	0.139639	0.0281636		0	0.276382	9.51063	0.105146	0.125628	7.04107e-07	0.00045683	0.125857	0.0154129		-0.40201	0.276382	9.37928	0.106618	0.125628	1.76914e-06	0.00045683	0.125857	0.0387264		0.0107791	0.276382	9.51062	0.105146	0.125631	7.038e-07	0.000456859	0.125859	0.0154052		-0.135678	0	9.49956	0.105268
						-0.30751	0.279201	9.49608	0.105307	0.139911	1.5225e-06	0.000540543	0.140181	0.0281661		0	0.275925	9.51057	0.105146	0.126085	7.04107e-07	0.00045683	0.126313	0.0154129		-0.40201	0.275925	9.37913	0.10662	0.126085	1.76914e-06	0.00045683	0.126313	0.0387264		0.0107843	0.275925	9.51056	0.105146	0.126088	7.03889e-07	0.00045686	0.126316	0.0154071		-0.136135	0	9.49955	0.105268
						-0.307966	0.278912	9.49594	0.105308	0.140451	1.51751e-06	0.000538739	0.140721	0.0281678		0	0.275468	9.5105	0.105147	0.126542	7.04107e-07	0.00045683	0.12677	0.0154129		-0.40201	0.275468	9.37897	0.106621	0.126542	1.76914e-06	0.00045683	0.12677	0.0387264		0.0107896	0.275468	9.51049	0.105147	0.126544	7.0403e-07	0.00045686	0.126773	0.0154102		-0.136592	0	9.49954	0.105268
						-0.308423	0.278627	9.49581	0.10531	0.14099	1.51964e-06	0.000536989	0.141258	0.0282992		0	0.275011	9.51044	0.105148	0.126999	7.04107e-07	0.00045683	0.127227	0.0154129		-0.40201	0.275011	9.37882	0.106623	0.126999	1.76914e-06	0.00045683	0.127227	0.0387264		0.0107948	0.275011	9.51043	0.105148	0.127001	7.04031e-07	0.00045686	0.12723	0.0154102		-0.137049	0	9.49953	0.105268
						-0.30888	0.278345	9.49567	0.105311	0.141527	1.52126e-06	0.000535291	0.141795	0.0284193		0	0.274555	9.51038	0.105148	0.127455	7.04107e-07	0.00045683	0.127684	0.0154129		-0.40201	0.274555	9.37866	0.106625	0.127455	1.76914e-06	0.00045683	0.127684	0.0387264		0.0108001	0.274555	9.51037	0.105148	0.127458	7.04031e-07	0.000456861	0.127687	0.0154102		-0.137506	0	9.49952	0.105268
						-0.309337	0.278066	9.49553	0.105313	0.142062	1.51652e-06	0.000533643	0.142329	0.0284183		0	0.274098	9.51031	0.105149	0.127912	7.04107e-07	0.00045683	0.128141	0.0154129		-0.40201	0.274098	9.37851	0.106627	0.127912	1.76914e-06	0.00045683	0.128141	0.0387264		0.0108054	0.274098	9.5103	0.105149	0.127915	7.04032e-07	0.000456861	0.128143	0.0154102		-0.137963	0	9.49951	0.105269
						-0.309794	0.27779	9.4954	0.105314	0.142596	1.51189e-06	0.000532044	0.142862	0.0284167		0	0.273641	9.51025	0.10515	0.128369	7.04107e-07	0.00045683	0.128598	0.0154129		-0.40201	0.273641	9.37835	0.106629	0.128369	1.76914e-06	0.00045683	0.128598	0.0387264		0.0108108	0.273641	9.51024	0.10515	0.128372	7.04032e-07	0.000456861	0.1286	0.0154102		-0.138419	0	9.4995	0.105269
						-0.310251	0.277517	9.49526	0.105316	0.143128	1.50736e-06	0.000530491	0.143393	0.0284144		0	0.273184	9.51018	0.10515	0.128826	7.04107e-07	0.00045683	0.129054	0.0154129		-0.40201	0.273184	9.37819	0.10663	0.128826	1.76914e-06	0.00045683	0.129054	0.0387264		0.0108162	0.273184	9.51018	0.105151	0.128829	7.04033e-07	0.000456862	0.129057	0.0154102		-0.138876	0	9.49949	0.105269
						-0.310707	0.277247	9.49512	0.105317	0.143658	1.50291e-06	0.000528983	0.143923	0.0284114		0	0.272727	9.51012	0.105151	0.129283	7.04107e-07	0.00045683	0.129511	0.0154129		-0.40201	0.272727	9.37804	0.106632	0.129283	1.76914e-06	0.00045683	0.129511	0.0387264		0.0108216	0.272727	9.51011	0.105151	0.129286	7.04033e-07	0.000456862	0.129514	0.0154102		-0.139333	0	9.49948	0.105269
						-0.311164	0.276981	9.49499	0.105319	0.144187	1.5129e-06	0.000527518	0.144451	0.0286796		0	0.27227	9.51006	0.105152	0.12974	7.04107e-07	0.00045683	0.129968	0.0154129		-0.40201	0.27227	9.37788	0.106634	0.12974	1.76914e-06	0.00045683	0.129968	0.0387264		0.010827	0.27227	9.51005	0.105152	0.129742	7.04034e-07	0.000456862	0.129971	0.0154102		-0.13979	0	9.49947	0.105269
						-0.311621	0.276717	9.49485	0.10532	0.144715	1.6076e-06	0.000526078	0.144978	0.0305582		0	0.271814	9.50999	0.105153	0.130196	7.04107e-07	0.00045683	0.130425	0.0154129		-0.40201	0.271814	9.37773	0.106636	0.130196	1.76914e-06	0.00045683	0.130425	0.0387264		0.0108324	0.271814	9.50998	0.105153	0.130199	7.04034e-07	0.000456863	0.130428	0.0154102		-0.140247	0	9.49946	0.105269
						-0.312078	0.276456	9.49471	0.105322	0.145241	1.58897e-06	0.000524575	0.145503	0.0302907		0	0.271357	9.50993	0.105153	0.130653	6.54057e-07	0.00045683	0.130882	0.0143173		-0.40201	0.271357	9.37757	0.106637	0.130653	1.76914e-06	0.00045683	0.130882	0.0387264		0.0108379	0.271357	9.50992	0.105153	0.130656	6.53764e-07	0.000456863	0.130885	0.0143099		-0.140704	0	9.49945	0.105269
						-0.312535	0.276198	9.49456	0.105323	0.145766	1.57679e-06	0.000523142	0.146027	0.0301407		0	0.2709	9.50987	0.105154	0.13111	6.54057e-07	0.00045683	0.131339	0.0143173		-0.40201	0.2709	9.37742	0.106639	0.13111	1.76914e-06	0.00045683	0.131339	0.0387264		0.0108434	0.2709	9.50986	0.105154	0.131113	6.53821e-07	0.000456863	0.131341	0.0143111		-0.14116	0	9.49944	0.105269
						-0.312992	0.275943	9.49442	0.105325	0.146289	1.5728e-06	0.000521762	0.14655	0.0301439		0	0.270443	9.50981	0.105155	0.131567	6.54057e-07	0.00045683	0.131795	0.0143173		-0.40201	0.270443	9.37726	0.106641	0.131567	1.76914e-06	0.00045683	0.131795	0.0387264		0.010849	0.270443	9.5098	0.105155	0.13157	6.53988e-07	0.000456864	0.131798	0.0143147		-0.141617	0	9.49943	0.105269
						-0.313448	0.275691	9.49428	0.105327	0.14681	1.56889e-06	0.000520424	0.147071	0.0301464		0	0.269986	9.50975	0.105155	0.132024	6.54057e-07	0.00045683	0.132252	0.0143173		-0.40201	0.269986	9.37711	0.106643	0.132024	1.76914e-06	0.00045683	0.132252	0.0387264		0.0108545	0.269986	9.50974	0.105155	0.132027	6.53989e-07	0.000456864	0.132255	0.0143147		-0.142074	0	9.49942	0.10527
						-0.313905	0.275442	9.49414	0.105328	0.147331	1.56507e-06	0.000519125	0.14759	0.0301482		0	0.269529	9.50969	0.105156	0.132481	6.54057e-07	0.00045683	0.132709	0.0143173		-0.40201	0.269529	9.37695	0.106644	0.132481	1.76914e-06	0.00045683	0.132709	0.0387264		0.0108601	0.269529	9.50968	0.105156	0.132484	6.53989e-07	0.000456864	0.132712	0.0143147		-0.142531	0	9.49941	0.10527
						-0.314362	0.275195	9.494	0.10533	0.14785	1.56132e-06	0.000517865	0.148109	0.0301493		0	0.269073	9.50963	0.105157	0.132937	6.54057e-07	0.00045683	0.133166	0.0143173		-0.40201	0.269073	9.37679	0.106646	0.132937	1.76914e-06	0.00045683	0.133166	0.0387264		0.0108658	0.269073	9.50963	0.105157	0.13294	6.5399e-07	0.000456865	0.133169	0.0143147		-0.142988	0	9.4994	0.10527
						-0.314819	0.274951	9.49386	0.105331	0.148368	1.56621e-06	0.000516641	0.148626	0.0303152		0	0.268616	9.50958	0.105157	0.133394	6.54057e-07	0.00045683	0.133623	0.0143173		-0.40201	0.268616	9.37664	0.106648	0.133394	1.76914e-06	0.00045683	0.133623	0.0387264		0.0108714	0.268616	9.50957	0.105157	0.133397	6.5399e-07	0.000456865	0.133626	0.0143147		-0.143444	0	9.49939	0.10527
						-0.315276	0.27471	9.49372	0.105333	0.148885	1.57038e-06	0.000515454	0.149142	0.030466		0	0.268159	9.50952	0.105158	0.133851	6.54057e-07	0.00045683	0.134079	0.0143173		-0.40201	0.268159	9.37648	0.10665	0.133851	1.76914e-06	0.00045683	0.134079	0.0387264		0.0108771	0.268159	9.50951	0.105158	0.133854	6.53991e-07	0.000456865	0.134083	0.0143147		-0.143901	0	9.49938	0.10527
						-0.315733	0.274471	9.49357	0.105334	0.1494	1.56681e-06	0.0005143	0.149657	0.0304649		0	0.267702	9.50946	0.105158	0.134308	6.54057e-07	0.00045683	0.134536	0.0143173		-0.40201	0.267702	9.37633	0.106652	0.134308	1.76914e-06	0.00045683	0.134536	0.0387264		0.0108828	0.267702	9.50945	0.105159	0.134311	6.53991e-07	0.000456866	0.13454	0.0143147		-0.144358	0	9.49937	0.10527
						-0.316189	0.274235	9.49343	0.105336	0.149914	1.57992e-06	0.00051318	0.150171	0.0307868		0	0.267245	9.5094	0.105159	0.134765	6.54057e-07	0.00045683	0.134993	0.0143173		-0.40201	0.267245	9.37617	0.106653	0.134765	1.76914e-06	0.00045683	0.134993	0.0387264		0.0108885	0.267245	9.50939	0.105159	0.134768	6.53992e-07	0.000456866	0.134996	0.0143147		-0.144815	0	9.49936	0.10527
						-0.316646	0.274001	9.49329	0.105338	0.150427	1.67973e-06	0.000512077	0.150683	0.0328023		0	0.266788	9.50934	0.10516	0.135222	6.54057e-07	0.00045683	0.13545	0.0143173		-0.40201	0.266788	9.37602	0.106655	0.135222	1.76914e-06	0.00045683	0.13545	0.0387264		0.0108943	0.266788	9.50933	0.10516	0.135225	6.53993e-07	0.000456866	0.135453	0.0143147		-0.145272	0	9.49935	0.10527
						-0.317103	0.27377	9.49314	0.105339	0.15094	1.67604e-06	0.000510913	0.151195	0.0328047		0	0.266332	9.50928	0.10516	0.135678	6.0793e-07	0.00045683	0.135907	0.0133076		-0.40201	0.266332	9.37586	0.106657	0.135678	1.60754e-06	0.00045683	0.135907	0.0351889		0.0109001	0.266332	9.50927	0.105161	0.135682	6.07838e-07	0.000456867	0.13591	0.0133045		-0.145729	0	9.49934	0.10527
						-0.31756	0.273541	9.49299	0.105341	0.15145	1.67243e-06	0.000509786	0.151705	0.0328064		0	0.265875	9.50922	0.105161	0.136135	6.0793e-07	0.00045683	0.136364	0.0133076		-0.40201	0.265875	9.37572	0.106658	0.136135	1.60754e-06	0.00045683	0.136364	0.0351889		0.0109059	0.265875	9.50922	0.105161	0.136139	6.07843e-07	0.000456867	0.136367	0.0133046		-0.146185	0	9.49933	0.105271
						-0.318017	0.273315	9.49284	0.105343	0.15196	1.67309e-06	0.000508694	0.152215	0.0328899		0	0.265418	9.50917	0.105162	0.136592	6.0793e-07	0.00045683	0.13682	0.0133076		-0.40201	0.265418	9.37558	0.10666	0.136592	1.60754e-06	0.00045683	0.13682	0.0351889		0.0109118	0.265418	9.50916	0.105162	0.136595	6.07873e-07	0.000456868	0.136824	0.0133052		-0.146642	0	9.49932	0.105271
						-0.318474	0.273091	9.49269	0.105344	0.152469	1.68363e-06	0.000507636	0.152723	0.0331662		0	0.264961	9.50911	0.105162	0.137049	6.0793e-07	0.00045683	0.137277	0.0133076		-0.40201	0.264961	9.37544	0.106662	0.137049	1.60754e-06	0.00045683	0.137277	0.0351889		0.0109177	0.264961	9.50911	0.105162	0.137052	6.07874e-07	0.000456868	0.137281	0.0133052		-0.147099	0	9.49931	0.105271
						-0.31893	0.27287	9.49253	0.105346	0.152977	1.68019e-06	0.000506609	0.15323	0.0331655		0	0.264504	9.50906	0.105163	0.137506	6.0793e-07	0.00045683	0.137734	0.0133076		-0.40201	0.264504	9.3753	0.106663	0.137506	1.60754e-06	0.00045683	0.137734	0.0351889		0.0109236	0.264504	9.50905	0.105163	0.137509	6.07874e-07	0.000456869	0.137738	0.0133052		-0.147556	0	9.4993	0.105271
						-0.319387	0.272651	9.49238	0.105348	0.153483	1.67683e-06	0.000505613	0.153736	0.0331643		0	0.264048	9.509	0.105163	0.137963	6.0793e-07	0.00045683	0.138191	0.0133076		-0.40201	0.264048	9.37515	0.106665	0.137963	1.60754e-06	0.00045683	0.138191	0.0351889		0.0109296	0.264048	9.509	0.105164	0.137966	6.07875e-07	0.000456869	0.138194	0.0133052		-0.148013	0	9.49928	0.105271
						-0.319844	0.272434	9.49223	0.105349	0.153989	1.67354e-06	0.000504648	0.154241	0.0331625		0	0.263591	9.50895	0.105164	0.138419	6.0793e-07	0.00045683	0.138648	0.0133076		-0.40201	0.263591	9.37501	0.106667	0.138419	1.60754e-06	0.00045683	0.138648	0.0351889		0.0109356	0.263591	9.50894	0.105164	0.138423	6.07876e-07	0.000456869	0.138651	0.0133052		-0.14847	0	9.49927	0.105271
						-0.320301	0.27222	9.49208	0.105351	0.154493	1.67032e-06	0.00050371	0.154745	0.0331603		0	0.263134	9.50889	0.105165	0.138876	6.0793e-07	0.00045683	0.139105	0.0133076		-0.40201	0.263134	9.37487	0.106668	0.138876	1.60754e-06	0.00045683	0.139105	0.0351889		0.0109416	0.263134	9.50889	0.105165	0.13888	6.07877e-07	0.00045687	0.139108	0.0133052		-0.148926	0	9.49926	0.105271
						-0.320758	0.272007	9.49193	0.105353	0.154997	1.66716e-06	0.000502801	0.155249	0.0331576		0	0.262677	9.50884	0.105165	0.139333	6.0793e-07	0.00045683	0.139561	0.0133076		-0.40201	0.262677	9.37473	0.10667	0.139333	1.60754e-06	0.00045683	0.139561	0.0351889		0.0109477	0.262677	9.50883	0.105165	0.139337	6.07877e-07	0.00045687	0.139565	0.0133052		-0.149383	0	9.49925	0.105271
						-0.321214	0.271797	9.49178	0.105354	0.1555	1.68319e-06	0.000501917	0.155751	0.0335353		0	0.26222	9.50878	0.105166	0.13979	6.0793e-07	0.00045683	0.140018	0.0133076		-0.40201	0.26222	9.37459	0.106671	0.13979	1.60754e-06	0.00045683	0.140018	0.0351889		0.0109538	0.26222	9.50878	0.105166	0.139794	6.07878e-07	0.000456871	0.140022	0.0133053		-0.14984	0	9.49924	0.105272
						-0.321671	0.27159	9.49163	0.105356	0.156002	1.81479e-06	0.000501047	0.156252	0.03622		0	0.261763	9.50873	0.105167	0.140247	6.0793e-07	0.00045683	0.140475	0.0133076		-0.40201	0.261763	9.37445	0.106673	0.140247	1.54109e-06	0.00045683	0.140475	0.0337346		0.0109599	0.261763	9.50872	0.105167	0.14025	6.07879e-07	0.000456871	0.140479	0.0133053		-0.150297	0	9.49923	0.105272
						-0.322128	0.271384	9.49147	0.105358	0.156503	1.79744e-06	0.000500123	0.156753	0.0359398		0	0.261307	9.50867	0.105167	0.140704	5.6538e-07	0.00045683	0.140932	0.0123762		-0.40201	0.261307	9.37431	0.106674	0.140704	1.54109e-06	0.00045683	0.140932	0.0337346		0.0109661	0.261307	9.50867	0.105167	0.140707	5.65123e-07	0.000456872	0.140936	0.0123694		-0.150754	0	9.49922	0.105272
						-0.322585	0.27118	9.4913	0.10536	0.157003	1.79148e-06	0.000499243	0.157253	0.035884		0	0.26085	9.50862	0.105168	0.14116	5.6538e-07	0.00045683	0.141389	0.0123762		-0.40201	0.26085	9.37418	0.106676	0.14116	1.54109e-06	0.00045683	0.141389	0.0337346		0.0109723	0.26085	9.50861	0.105168	0.141164	5.65124e-07	0.000456872	0.141393	0.0123694		-0.151211	0	9.49921	0.105272
						-0.323042	0.270979	9.49114	0.105361	0.157502	1.78856e-06	0.000498391	0.157751	0.0358867		0	0.260393	9.50857	0.105168	0.141617	5.6538e-07	0.00045683	0.141846	0.0123762		-0.40201	0.260393	9.37404	0.106678	0.141617	1.54109e-06	0.00045683	0.141846	0.0337346		0.0109785	0.260393	9.50856	0.105168	0.141621	5.65327e-07	0.000456873	0.141849	0.0123738		-0.151667	0	9.49919	0.105272
						-0.323499	0.27078	9.49098	0.105363	0.158001	1.78571e-06	0.000497566	0.158249	0.0358889		0	0.259936	9.50852	0.105169	0.142074	5.6538e-07	0.00045683	0.142302	0.0123762		-0.40201	0.259936	9.37391	0.106679	0.142074	1.54109e-06	0.00045683	0.142302	0.0337346		0.0109848	0.259936	9.50851	0.105169	0.142078	5.65334e-07	0.000456873	0.142306	0.012374		-0.152124	0	9.49918	0.105272
						-0.323955	0.270582	9.49082	0.105365	0.158498	1.78292e-06	0.000496767	0.158747	0.0358905		0	0.259479	9.50847	0.105169	0.142531	5.6538e-07	0.00045683	0.142759	0.0123762		-0.40201	0.259479	9.37377	0.106681	0.142531	1.54109e-06	0.00045683	0.142759	0.0337346		0.0109911	0.259479	9.50846	0.105169	0.142535	5.65335e-07	0.000456874	0.142763	0.012374		-0.152581	0	9.49917	0.105272
						-0.324412	0.270387	9.49066	0.105367	0.158995	1.78019e-06	0.000495991	0.159243	0.0358916		0	0.259022	9.50842	0.10517	0.142988	5.6538e-07	0.00045683	0.143216	0.0123762		-0.40201	0.259022	9.37364	0.106682	0.142988	1.54109e-06	0.00045683	0.143216	0.0337346		0.0109975	0.259022	9.50841	0.10517	0.142992	5.65335e-07	0.000456874	0.14322	0.012374		-0.153038	0	9.49916	0.105272
						-0.324869	0.270194	9.4905	0.105369	0.159491	1.77904e-06	0.000495239	0.159739	0.0359227		0	0.258566	9.50837	0.105171	0.143444	5.6538e-07	0.00045683	0.143673	0.0123762		-0.40201	0.258566	9.3735	0.106684	0.143444	1.54109e-06	0.00045683	0.143673	0.0337346		0.0110038	0.258566	9.50836	0.105171	0.143448	5.65336e-07	0.000456874	0.143677	0.012374		-0.153495	0	9.49915	0.105273
						-0.325326	0.270003	9.49034	0.10537	0.159986	1.79579e-06	0.00049451	0.160233	0.0363146		0	0.258109	9.50832	0.105171	0.143901	5.6538e-07	0.00045683	0.14413	0.0123762		-0.40201	0.258109	9.37336	0.106685	0.143901	1.54109e-06	0.00045683	0.14413	0.0337346		0.0110102	0.258109	9.50831	0.105171	0.143905	5.65337e-07	0.000456875	0.144134	0.012374		-0.153952	0	9.49914	0.105273
						-0.325783	0.269814	9.49018	0.105372	0.160481	1.79318e-06	0.000493802	0.160728	0.0363137		0	0.257652	9.50827	0.105172	0.144358	5.6538e-07	0.00045683	0.144587	0.0123762		-0.40201	0.257652	9.37323	0.106687	0.144358	1.54109e-06	0.00045683	0.144587	0.0337346		0.0110167	0.257652	9.50826	0.105172	0.144362	5.65337e-07	0.000456875	0.144591	0.012374		-0.154408	0	9.49912	0.105273
						-0.32624	0.269626	9.49002	0.105374	0.160975	1.81309e-06	0.000493114	0.161221	0.0367681		0	0.257195	9.50821	0.105172	0.144815	5.6538e-07	0.00045683	0.145043	0.0123762		-0.40201	0.257195	9.37309	0.106688	0.144815	1.54109e-06	0.00045683	0.145043	0.0337346		0.0110231	0.257195	9.50821	0.105172	0.144819	5.65338e-07	0.000456876	0.145048	0.012374		-0.154865	0	9.49911	0.105273
						-0.326696	0.26944	9.48985	0.105376	0.161468	1.95032e-06	0.000492436	0.161714	0.0396057		0	0.256738	9.50816	0.105173	0.145272	5.6538e-07	0.00045683	0.1455	0.0123762		-0.40201	0.256738	9.37296	0.10669	0.145272	1.54109e-06	0.00045683	0.1455	0.0337346		0.0110296	0.256738	9.50815	0.105173	0.145276	5.65339e-07	0.000456876	0.145504	0.012374		-0.155322	0	9.4991	0.105273
						-0.327153	0.269257	9.48968	0.105378	0.16196	1.94756e-06	0.000491708	0.162206	0.0396082		0	0.256281	9.50811	0.105173	0.145729	5.26093e-07	0.00045683	0.145957	0.0115162		-0.40201	0.256281	9.37282	0.106691	0.145729	1.46584e-06	0.00045683	0.145957	0.0320872		0.0110362	0.256281	9.5081	0.105173	0.145733	5.25854e-07	0.000456877	0.145961	0.0115098		-0.155779	0	9.49909	0.105273
						-0.32761	0.269075	9.4895	0.10538	0.162452	1.94487e-06	0.000491003	0.162697	0.0396101		0	0.255825	9.50806	0.105174	0.146185	5.26093e-07	0.00045683	0.146414	0.0115162		-0.40201	0.255825	9.37269	0.106693	0.146185	1.46584e-06	0.00045683	0.146414	0.0320872		0.0110427	0.255825	9.50806	0.105174	0.14619	5.25854e-07	0.000456877	0.146418	0.0115098		-0.156236	0	9.49908	0.105273
						-0.328067	0.268895	9.48933	0.105382	0.162943	1.94223e-06	0.000490321	0.163188	0.0396115		0	0.255368	9.50802	0.105174	0.146642	5.26093e-07	0.00045683	0.146871	0.0115162		-0.40201	0.255368	9.37257	0.106694	0.146642	1.46584e-06	0.00045683	0.146871	0.0320872		0.0110493	0.255368	9.50801	0.105174	0.146647	5.26018e-07	0.000456878	0.146875	0.0115133		-0.156693	0	9.49906	0.105274
						-0.328524	0.268717	9.48915	0.105383	0.163433	1.94485e-06	0.00048966	0.163678	0.0397183		0	0.254911	9.50797	0.105175	0.147099	5.26093e-07	0.00045683	0.147328	0.0115162		-0.40201	0.254911	9.37244	0.106696	0.147099	1.46584e-06	0.00045683	0.147328	0.0320872		0.011056	0.254911	9.50796	0.105175	0.147103	5.26057e-07	0.000456878	0.147332	0.0115142		-0.157149	0	9.49905	0.105274
						-0.328981	0.26854	9.48898	0.105385	0.163923	1.96073e-06	0.000489021	0.164167	0.0400951		0	2
[truncated: 5 more columns]

## Sheet: Conductance matrix
																				0.1057	0.105458	0.105326	0.105232	0.105159	0.105099	0.105049	0.105005	0.104968	0.104934	0.104905	0.104878	0.104854	0.104831	0.104811	0.104793	0.104775	0.104759	0.104744	0.104731	0.104718	0.104706	0.104694	0.104684	0.104674	0.104665	0.104656	0.104647	0.10464	0.104632
																				0.105759	0.105512	0.105378	0.105283	0.105209	0.105149	0.105099	0.105056	0.105019	0.104986	0.104956	0.10493	0.104906	0.104884	0.104864	0.104845	0.104828	0.104813	0.104798	0.104784	0.104772	0.10476	0.104749	0.104738	0.104728	0.104719	0.10471	0.104702	0.104694	0.104687
																				0.105816	0.105564	0.105427	0.105331	0.105257	0.105196	0.105146	0.105103	0.105066	0.105033	0.105004	0.104978	0.104954	0.104932	0.104913	0.104895	0.104878	0.104862	0.104848	0.104834	0.104822	0.10481	0.104799	0.104789	0.104779	0.10477	0.104761	0.104753	0.104745	0.104738
																				0.10587	0.105613	0.105474	0.105376	0.105301	0.10524	0.10519	0.105147	0.10511	0.105077	0.105048	0.105022	0.104999	0.104977	0.104958	0.10494	0.104923	0.104908	0.104894	0.104881	0.104868	0.104857	0.104846	0.104836	0.104826	0.104817	0.104809	0.104801	0.104793	0.104786
																				0.105923	0.105659	0.105518	0.105418	0.105342	0.105281	0.10523	0.105187	0.10515	0.105118	0.105089	0.105063	0.10504	0.105019	0.104999	0.104982	0.104965	0.10495	0.104936	0.104923	0.104911	0.1049	0.104889	0.104879	0.104869	0.104861	0.104852	0.104844	0.104837	0.10483
																				0.105973	0.105704	0.105559	0.105458	0.105381	0.105319	0.105268	0.105225	0.105187	0.105155	0.105126	0.1051	0.105077	0.105056	0.105037	0.10502	0.105004	0.104989	0.104975	0.104962	0.10495	0.104939	0.104928	0.104919	0.104909	0.104901	0.104892	0.104885	0.104877	0.10487
																				0.10602	0.105746	0.105598	0.105495	0.105417	0.105354	0.105302	0.105259	0.105221	0.105189	0.10516	0.105135	0.105112	0.105091	0.105072	0.105055	0.105039	0.105024	0.10501	0.104998	0.104986	0.104975	0.104965	0.104955	0.104946	0.104937	0.104929	0.104921	0.104914	0.104907
																				0.106066	0.105785	0.105635	0.10553	0.10545	0.105387	0.105334	0.10529	0.105253	0.10522	0.105191	0.105166	0.105143	0.105122	0.105104	0.105086	0.105071	0.105056	0.105043	0.10503	0.105019	0.105008	0.104998	0.104988	0.104979	0.104971	0.104963	0.104955	0.104948	0.104941
																				0.10611	0.105823	0.105669	0.105562	0.105481	0.105417	0.105364	0.10532	0.105282	0.105249	0.10522	0.105194	0.105172	0.105151	0.105132	0.105115	0.1051	0.105085	0.105072	0.10506	0.105048	0.105038	0.105028	0.105018	0.105009	0.105001	0.104993	0.104986	0.104979	0.104972
																				0.106152	0.105859	0.105702	0.105593	0.105511	0.105445	0.105392	0.105347	0.105308	0.105275	0.105246	0.105221	0.105198	0.105177	0.105159	0.105142	0.105126	0.105112	0.105099	0.105087	0.105075	0.105065	0.105055	0.105046	0.105037	0.105029	0.105021	0.105014	0.105007	0.105001
																				0.106192	0.105893	0.105733	0.105622	0.105538	0.105471	0.105417	0.105372	0.105333	0.105299	0.10527	0.105245	0.105222	0.105201	0.105183	0.105166	0.10515	0.105136	0.105123	0.105111	0.1051	0.10509	0.10508	0.105071	0.105062	0.105054	0.105047	0.10504	0.105033	0.105026
																				0.10623	0.105926	0.105763	0.105649	0.105564	0.105496	0.105441	0.105395	0.105356	0.105322	0.105292	0.105267	0.105244	0.105223	0.105204	0.105188	0.105172	0.105158	0.105145	0.105134	0.105122	0.105112	0.105103	0.105094	0.105085	0.105077	0.10507	0.105063	0.105056	0.10505
																				0.106267	0.105957	0.105791	0.105675	0.105588	0.105519	0.105463	0.105416	0.105377	0.105343	0.105313	0.105287	0.105264	0.105243	0.105225	0.105208	0.105192	0.105178	0.105166	0.105154	0.105143	0.105133	0.105123	0.105114	0.105106	0.105098	0.105091	0.105084	0.105078	0.105071
																				0.106302	0.105986	0.105817	0.1057	0.105611	0.105541	0.105484	0.105437	0.105396	0.105362	0.105332	0.105306	0.105282	0.105262	0.105243	0.105226	0.105211	0.105197	0.105184	0.105172	0.105161	0.105151	0.105142	0.105133	0.105125	0.105117	0.10511	0.105103	0.105097	0.105091
																				0.106335	0.106015	0.105842	0.105723	0.105633	0.105562	0.105504	0.105455	0.105415	0.10538	0.105349	0.105323	0.105299	0.105279	0.10526	0.105243	0.105228	0.105214	0.105201	0.105189	0.105179	0.105168	0.105159	0.105151	0.105142	0.105135	0.105128	0.105121	0.105115	0.105109
																				0.106367	0.106042	0.105866	0.105745	0.105653	0.105581	0.105522	0.105473	0.105432	0.105396	0.105366	0.105339	0.105315	0.105294	0.105275	0.105259	0.105243	0.105229	0.105217	0.105205	0.105194	0.105184	0.105175	0.105166	0.105158	0.105151	0.105144	0.105137	0.105131	0.105125
																				0.106398	0.106067	0.105889	0.105766	0.105673	0.105599	0.10554	0.10549	0.105448	0.105412	0.105381	0.105354	0.10533	0.105309	0.10529	0.105273	0.105257	0.105244	0.105231	0.105219	0.105208	0.105198	0.105189	0.105181	0.105173	0.105165	0.105158	0.105152	0.105146	0.10514
																				0.106427	0.106092	0.105911	0.105786	0.105691	0.105617	0.105556	0.105506	0.105463	0.105427	0.105395	0.105368	0.105344	0.105322	0.105303	0.105286	0.105271	0.105257	0.105244	0.105232	0.105222	0.105212	0.105203	0.105194	0.105186	0.105179	0.105172	0.105165	0.105159	0.105154
																				0.106455	0.106115	0.105932	0.105805	0.105709	0.105633	0.105572	0.105521	0.105477	0.105441	0.105409	0.105381	0.105357	0.105335	0.105316	0.105298	0.105283	0.105269	0.105256	0.105244	0.105234	0.105224	0.105215	0.105206	0.105198	0.105191	0.105184	0.105178	0.105172	0.105166
																				0.106482	0.106138	0.105952	0.105823	0.105726	0.105649	0.105587	0.105535	0.105491	0.105454	0.105421	0.105393	0.105369	0.105347	0.105327	0.10531	0.105294	0.10528	0.105267	0.105256	0.105245	0.105235	0.105226	0.105217	0.10521	0.105202	0.105196	0.105189	0.105183	0.105178
																				0.106507	0.106159	0.105971	0.105841	0.105742	0.105664	0.105601	0.105548	0.105504	0.105466	0.105433	0.105405	0.10538	0.105358	0.105338	0.105321	0.105305	0.105291	0.105278	0.105266	0.105255	0.105245	0.105236	0.105228	0.10522	0.105213	0.105206	0.1052	0.105194	0.105188
																				0.106532	0.10618	0.105989	0.105857	0.105757	0.105678	0.105614	0.105561	0.105516	0.105478	0.105445	0.105416	0.105391	0.105368	0.105348	0.105331	0.105315	0.105301	0.105288	0.105276	0.105265	0.105255	0.105246	0.105237	0.10523	0.105222	0.105216	0.105209	0.105204	0.105198
																				0.106555	0.106199	0.106007	0.105873	0.105772	0.105692	0.105627	0.105573	0.105528	0.105489	0.105455	0.105426	0.105401	0.105378	0.105358	0.10534	0.105324	0.10531	0.105297	0.105285	0.105274	0.105264	0.105255	0.105246	0.105239	0.105231	0.105225	0.105218	0.105212	0.105207
																				0.106577	0.106218	0.106023	0.105888	0.105786	0.105705	0.105639	0.105585	0.105539	0.105499	0.105465	0.105436	0.10541	0.105387	0.105367	0.105349	0.105333	0.105318	0.105305	0.105293	0.105282	0.105272	0.105263	0.105255	0.105247	0.10524	0.105233	0.105227	0.105221	0.105215
																				0.106599	0.106236	0.106039	0.105903	0.105799	0.105717	0.105651	0.105596	0.105549	0.105509	0.105475	0.105445	0.105419	0.105396	0.105376	0.105357	0.105341	0.105326	0.105313	0.105301	0.10529	0.10528	0.105271	0.105262	0.105254	0.105247	0.105241	0.105234	0.105229	0.105223
																				0.106619	0.106253	0.106055	0.105916	0.105812	0.105729	0.105662	0.105606	0.105559	0.105519	0.105484	0.105454	0.105428	0.105404	0.105384	0.105365	0.105349	0.105334	0.105321	0.105308	0.105297	0.105287	0.105278	0.105269	0.105262	0.105254	0.105248	0.105241	0.105236	0.10523
																				0.106638	0.106269	0.106069	0.10593	0.105824	0.105741	0.105673	0.105616	0.105569	0.105528	0.105493	0.105463	0.105436	0.105412	0.105391	0.105373	0.105356	0.105341	0.105328	0.105315	0.105304	0.105294	0.105285	0.105276	0.105268	0.105261	0.105254	0.105248	0.105242	0.105237
																				0.106657	0.106285	0.106083	0.105942	0.105836	0.105752	0.105683	0.105626	0.105578	0.105537	0.105501	0.105471	0.105444	0.10542	0.105399	0.10538	0.105363	0.105348	0.105334	0.105322	0.105311	0.1053	0.105291	0.105282	0.105275	0.105267	0.105261	0.105254	0.105249	0.105243
																				0.106675	0.1063	0.106096	0.105954	0.105847	0.105762	0.105693	0.105635	0.105587	0.105545	0.105509	0.105478	0.105451	0.105427	0.105406	0.105387	0.10537	0.105354	0.105341	0.105328	0.105317	0.105306	0.105297	0.105288	0.10528	0.105273	0.105266	0.10526	0.105254	0.105249
																				0.106691	0.106314	0.106109	0.105966	0.105858	0.105772	0.105702	0.105644	0.105595	0.105553	0.105517	0.105485	0.105458	0.105434	0.105412	0.105393	0.105376	0.10536	0.105347	0.105334	0.105323	0.105312	0.105303	0.105294	0.105286	0.105279	0.105272	0.105266	0.10526	0.105254
																				0.106708	0.106328	0.106121	0.105977	0.105868	0.105781	0.105711	0.105652	0.105603	0.105561	0.105524	0.105492	0.105465	0.10544	0.105418	0.105399	0.105382	0.105366	0.105352	0.105339	0.105328	0.105318	0.105308	0.105299	0.105291	0.105284	0.105277	0.105271	0.105265	0.105259
																				0.106723	0.106341	0.106133	0.105988	0.105878	0.105791	0.10572	0.105661	0.105611	0.105568	0.105531	0.105499	0.105471	0.105446	0.105424	0.105405	0.105387	0.105372	0.105358	0.105345	0.105333	0.105323	0.105313	0.105304	0.105296	0.105289	0.105282	0.105275	0.10527	0.105264
																				0.106738	0.106353	0.106144	0.105998	0.105887	0.105799	0.105728	0.105668	0.105618	0.105575	0.105538	0.105506	0.105477	0.105452	0.10543	0.10541	0.105393	0.105377	0.105363	0.10535	0.105338	0.105327	0.105318	0.105309	0.105301	0.105293	0.105286	0.10528	0.105274	0.105269
																				0.106752	0.106365	0.106154	0.106008	0.105896	0.105808	0.105736	0.105676	0.105625	0.105582	0.105544	0.105512	0.105483	0.105458	0.105436	0.105416	0.105398	0.105382	0.105367	0.105354	0.105343	0.105332	0.105322	0.105313	0.105305	0.105297	0.105291	0.105284	0.105278	0.105273
																				0.106765	0.106376	0.106165	0.106017	0.105905	0.105816	0.105743	0.105683	0.105632	0.105588	0.10555	0.105517	0.105489	0.105463	0.105441	0.105421	0.105403	0.105387	0.105372	0.105359	0.105347	0.105336	0.105326	0.105317	0.105309	0.105302	0.105295	0.105288	0.105282	0.105277
																				0.106778	0.106387	0.106174	0.106026	0.105913	0.105823	0.10575	0.10569	0.105638	0.105594	0.105556	0.105523	0.105494	0.105468	0.105446	0.105425	0.105407	0.105391	0.105377	0.105363	0.105351	0.10534	0.10533	0.105321	0.105313	0.105305	0.105298	0.105292	0.105286	0.10528
																				0.10679	0.106397	0.106184	0.106034	0.105921	0.105831	0.105757	0.105696	0.105644	0.1056	0.105562	0.105528	0.105499	0.105473	0.10545	0.10543	0.105412	0.105395	0.105381	0.105367	0.105355	0.105344	0.105334	0.105325	0.105317	0.105309	0.105302	0.105295	0.105289	0.105284
																				0.106802	0.106407	0.106193	0.106042	0.105928	0.105838	0.105764	0.105702	0.10565	0.105606	0.105567	0.105534	0.105504	0.105478	0.105455	0.105434	0.105416	0.1054	0.105385	0.105371	0.105359	0.105348	0.105338	0.105329	0.10532	0.105313	0.105305	0.105299	0.105293	0.105287
																				0.106813	0.106417	0.106201	0.10605	0.105936	0.105845	0.10577	0.105708	0.105656	0.105611	0.105572	0.105538	0.105509	0.105483	0.105459	0.105439	0.10542	0.105404	0.105389	0.105375	0.105363	0.105352	0.105341	0.105332	0.105324	0.105316	0.105309	0.105302	0.105296	0.10529
																				0.106824	0.106426	0.106209	0.106058	0.105942	0.105851	0.105776	0.105714	0.105661	0.105616	0.105577	0.105543	0.105513	0.105487	0.105464	0.105443	0.105424	0.105407	0.105392	0.105379	0.105366	0.105355	0.105345	0.105335	0.105327	0.105319	0.105312	0.105305	0.105299	0.105293
																				0.106834	0.106434	0.106217	0.106065	0.105949	0.105857	0.105782	0.10572	0.105667	0.105621	0.105582	0.105548	0.105518	0.105491	0.105468	0.105447	0.105428	0.105411	0.105396	0.105382	0.10537	0.105358	0.105348	0.105338	0.10533	0.105322	0.105315	0.105308	0.105302	0.105296
																				0.106843	0.106443	0.106224	0.106072	0.105955	0.105863	0.105788	0.105725	0.105672	0.105626	0.105587	0.105552	0.105522	0.105495	0.105471	0.10545	0.105431	0.105414	0.105399	0.105385	0.105373	0.105361	0.105351	0.105341	0.105333	0.105325	0.105317	0.105311	0.105305	0.105299
																				0.106853	0.106451	0.106231	0.106078	0.105961	0.105869	0.105793	0.10573	0.105676	0.105631	0.105591	0.105556	0.105526	0.105499	0.105475	0.105454	0.105435	0.105418	0.105402	0.105388	0.105376	0.105364	0.105354	0.105344	0.105335	0.105327	0.10532	0.105313	0.105307	0.105301
																				0.106862	0.106458	0.106238	0.106084	0.105967	0.105874	0.105798	0.105735	0.105681	0.105635	0.105595	0.10556	0.10553	0.105503	0.105479	0.105457	0.105438	0.105421	0.105405	0.105391	0.105379	0.105367	0.105356	0.105347	0.105338	0.10533	0.105323	0.105316	0.105309	0.105304
																				0.10687	0.106465	0.106245	0.10609	0.105973	0.105879	0.105803	0.105739	0.105685	0.105639	0.105599	0.105564	0.105533	0.105506	0.105482	0.105461	0.105441	0.105424	0.105408	0.105394	0.105381	0.10537	0.105359	0.105349	0.105341	0.105332	0.105325	0.105318	0.105312	0.105306
																				0.106878	0.106472	0.106251	0.106096	0.105978	0.105884	0.105808	0.105744	0.10569	0.105643	0.105603	0.105568	0.105537	0.10551	0.105485	0.105464	0.105444	0.105427	0.105411	0.105397	0.105384	0.105372	0.105362	0.105352	0.105343	0.105335	0.105327	0.10532	0.105314	0.105308
																				0.106886	0.106479	0.106257	0.106101	0.105983	0.105889	0.105812	0.105748	0.105694	0.105647	0.105606	0.105571	0.10554	0.105513	0.105488	0.105467	0.105447	0.10543	0.105414	0.1054	0.105387	0.105375	0.105364	0.105354	0.105345	0.105337	0.105329	0.105322	0.105316	0.10531
																				0.106893	0.106485	0.106262	0.106106	0.105988	0.105894	0.105816	0.105752	0.105697	0.105651	0.10561	0.105575	0.105543	0.105516	0.105491	0.105469	0.10545	0.105432	0.105416	0.105402	0.105389	0.105377	0.105366	0.105356	0.105347	0.105339	0.105331	0.105325	0.105318	0.105312
																				0.1069	0.106491	0.106268	0.106111	0.105993	0.105898	0.105821	0.105756	0.105701	0.105654	0.105613	0.105578	0.105546	0.105519	0.105494	0.105472	0.105453	0.105435	0.105419	0.105404	0.105391	0.105379	0.105368	0.105359	0.105349	0.105341	0.105333	0.105326	0.10532	0.105314
																				0.106907	0.106497	0.106273	0.106116	0.105997	0.105902	0.105824	0.10576	0.105705	0.105657	0.105617	0.105581	0.105549	0.105522	0.105497	0.105475	0.105455	0.105437	0.105421	0.105407	0.105393	0.105381	0.105371	0.105361	0.105351	0.105343	0.105335	0.105328	0.105322	0.105316
																				0.106913	0.106502	0.106278	0.106121	0.106001	0.105906	0.105828	0.105763	0.105708	0.105661	0.10562	0.105584	0.105552	0.105524	0.105499	0.105477	0.105457	0.10544	0.105423	0.105409	0.105396	0.105384	0.105373	0.105362	0.105353	0.105345	0.105337	0.10533	0.105323	0.105317
																				0.106919	0.106507	0.106282	0.106125	0.106005	0.10591	0.105832	0.105767	0.105711	0.105664	0.105623	0.105587	0.105555	0.105527	0.105502	0.10548	0.10546	0.105442	0.105426	0.105411	0.105398	0.105385	0.105374	0.105364	0.105355	0.105347	0.105339	0.105332	0.105325	0.105319
																				0.106925	0.106512	0.106287	0.106129	0.106009	0.105913	0.105835	0.10577	0.105714	0.105667	0.105625	0.105589	0.105557	0.105529	0.105504	0.105482	0.105462	0.105444	0.105428	0.105413	0.105399	0.105387	0.105376	0.105366	0.105357	0.105348	0.10534	0.105333	0.105327	0.105321
																				0.10693	0.106517	0.106291	0.106133	0.106013	0.105917	0.105838	0.105773	0.105717	0.105669	0.105628	0.105592	0.10556	0.105532	0.105507	0.105484	0.105464	0.105446	0.10543	0.105415	0.105401	0.105389	0.105378	0.105368	0.105358	0.10535	0.105342	0.105335	0.105328	0.105322
																				0.106935	0.106521	0.106295	0.106137	0.106016	0.10592	0.105841	0.105776	0.10572	0.105672	0.10563	0.105594	0.105562	0.105534	0.105509	0.105486	0.105466	0.105448	0.105431	0.105417	0.105403	0.105391	0.10538	0.105369	0.10536	0.105351	0.105343	0.105336	0.105329	0.105323
																				0.10694	0.106525	0.106299	0.10614	0.106019	0.105923	0.105844	0.105778	0.105723	0.105675	0.105633	0.105596	0.105564	0.105536	0.105511	0.105488	0.105468	0.10545	0.105433	0.105418	0.105405	0.105392	0.105381	0.105371	0.105361	0.105353	0.105345	0.105338	0.105331	0.105325
																				0.106945	0.106529	0.106302	0.106143	0.106022	0.105926	0.105847	0.105781	0.105725	0.105677	0.105635	0.105599	0.105567	0.105538	0.105513	0.10549	0.10547	0.105451	0.105435	0.10542	0.105406	0.105394	0.105383	0.105372	0.105363	0.105354	0.105346	0.105339	0.105332	0.105326
																				0.106949	0.106533	0.106306	0.106147	0.106025	0.105929	0.10585	0.105784	0.105727	0.105679	0.105637	0.105601	0.105569	0.10554	0.105515	0.105492	0.105471	0.105453	0.105436	0.105421	0.105408	0.105395	0.105384	0.105374	0.105364	0.105355	0.105347	0.10534	0.105333	0.105327
																				0.106953	0.106537	0.106309	0.10615	0.106028	0.105931	0.105852	0.105786	0.10573	0.105681	0.105639	0.105603	0.10557	0.105542	0.105516	0.105494	0.105473	0.105455	0.105438	0.105423	0.105409	0.105397	0.105385	0.105375	0.105365	0.105357	0.105349	0.105341	0.105334	0.105328
																				0.106957	0.10654	0.106312	0.106152	0.106031	0.105934	0.105855	0.105788	0.105732	0.105683	0.105641	0.105605	0.105572	0.105544	0.105518	0.105495	0.105475	0.105456	0.105439	0.105424	0.105411	0.105398	0.105387	0.105376	0.105367	0.105358	0.10535	0.105342	0.105335	0.105329
																				0.106961	0.106543	0.106315	0.106155	0.106033	0.105936	0.105857	0.10579	0.105734	0.105685	0.105643	0.105606	0.105574	0.105545	0.10552	0.105497	0.105476	0.105458	0.105441	0.105426	0.105412	0.105399	0.105388	0.105377	0.105368	0.105359	0.105351	0.105343	0.105336	0.10533
																				0.106964	0.106546	0.106318	0.106157	0.106036	0.105938	0.105859	0.105792	0.105736	0.105687	0.105645	0.105608	0.105576	0.105547	0.105521	0.105498	0.105477	0.105459	0.105442	0.105427	0.105413	0.1054	0.105389	0.105378	0.105369	0.10536	0.105352	0.105344	0.105337	0.105331
																				0.106968	0.106549	0.10632	0.10616	0.106038	0.105941	0.105861	0.105794	0.105738	0.105689	0.105647	0.10561	0.105577	0.105548	0.105522	0.105499	0.105479	0.10546	0.105443	0.105428	0.105414	0.105402	0.10539	0.105379	0.10537	0.105361	0.105353	0.105345	0.105338	0.105332
																				0.106971	0.106551	0.106323	0.106162	0.10604	0.105942	0.105863	0.105796	0.105739	0.10569	0.105648	0.105611	0.105578	0.105549	0.105524	0.105501	0.10548	0.105461	0.105444	0.105429	0.105415	0.105403	0.105391	0.10538	0.105371	0.105362	0.105354	0.105346	0.105339	0.105333
																				0.106974	0.106554	0.106325	0.106164	0.106042	0.105944	0.105864	0.105798	0.105741	0.105692	0.10565	0.105612	0.10558	0.105551	0.105525	0.105502	0.105481	0.105462	0.105445	0.10543	0.105416	0.105404	0.105392	0.105381	0.105372	0.105363	0.105354	0.105347	0.10534	0.105333
																				0.106976	0.106556	0.106327	0.106166	0.106044	0.105946	0.105866	0.105799	0.105742	0.105693	0.105651	0.105614	0.105581	0.105552	0.105526	0.105503	0.105482	0.105463	0.105446	0.105431	0.105417	0.105404	0.105393	0.105382	0.105372	0.105363	0.105355	0.105348	0.105341	0.105334
																				0.106979	0.106558	0.106329	0.106168	0.106045	0.105948	0.105867	0.105801	0.105744	0.105695	0.105652	0.105615	0.105582	0.105553	0.105527	0.105504	0.105483	0.105464	0.105447	0.105432	0.105418	0.105405	0.105394	0.105383	0.105373	0.105364	0.105356	0.105348	0.105341	0.105335
																				0.106981	0.10656	0.106331	0.106169	0.106047	0.105949	0.105869	0.105802	0.105745	0.105696	0.105653	0.105616	0.105583	0.105554	0.105528	0.105505	0.105484	0.105465	0.105448	0.105433	0.105419	0.105406	0.105394	0.105384	0.105374	0.105365	0.105357	0.105349	0.105342	0.105335
																				0.106983	0.106562	0.106332	0.106171	0.106048	0.10595	0.10587	0.105803	0.105746	0.105697	0.105654	0.105617	0.105584	0.105555	0.105529	0.105506	0.105485	0.105466	0.105449	0.105434	0.10542	0.105407	0.105395	0.105384	0.105374	0.105365	0.105357	0.10535	0.105343	0.105336
																				0.106985	0.106564	0.106334	0.106172	0.106049	0.105952	0.105871	0.105804	0.105747	0.105698	0.105655	0.105618	0.105585	0.105556	0.10553	0.105507	0.105486	0.105467	0.10545	0.105434	0.10542	0.105407	0.105396	0.105385	0.105375	0.105366	0.105358	0.10535	0.105343	0.105337
																				0.106987	0.106565	0.106335	0.106174	0.106051	0.105953	0.105872	0.105805	0.105748	0.105699	0.105656	0.105619	0.105586	0.105557	0.105531	0.105507	0.105486	0.105468	0.10545	0.105435	0.105421	0.105408	0.105396	0.105385	0.105376	0.105367	0.105358	0.105351	0.105344	0.105337
																				0.106988	0.106567	0.106336	0.106175	0.106052	0.105954	0.105873	0.105806	0.105749	0.1057	0.105657	0.10562	0.105587	0.105557	0.105531	0.105508	0.105487	0.105468	0.105451	0.105435	0.105421	0.105409	0.105397	0.105386	0.105376	0.105367	0.105359	0.105351	0.105344	0.105337
																				0.10699	0.106568	0.106337	0.106176	0.106053	0.105955	0.105874	0.105807	0.10575	0.1057	0.105658	0.10562	0.105587	0.105558	0.105532	0.105509	0.105488	0.105469	0.105452	0.105436	0.105422	0.105409	0.105397	0.105386	0.105377	0.105367	0.105359	0.105351	0.105344	0.105338
																				0.106991	0.106569	0.106338	0.106177	0.106053	0.105955	0.105875	0.105808	0.10575	0.105701	0.105658	0.105621	0.105588	0.105559	0.105532	0.105509	0.105488	0.105469	0.105452	0.105436	0.105422	0.105409	0.105398	0.105387	0.105377	0.105368	0.105359	0.105352	0.105345	0.105338
																				0.106992	0.10657	0.106339	0.106177	0.106054	0.105956	0.105876	0.105808	0.105751	0.105702	0.105659	0.105621	0.105588	0.105559	0.105533	0.10551	0.105489	0.10547	0.105452	0.105437	0.105423	0.10541	0.105398	0.105387	0.105377	0.105368	0.10536	0.105352	0.105345	0.105338
																				0.106993	0.106571	0.10634	0.106178	0.106055	0.105957	0.105876	0.105809	0.105751	0.105702	0.105659	0.105622	0.105589	0.105559	0.105533	0.10551	0.105489	0.10547	0.105453	0.105437	0.105423	0.10541	0.105398	0.105387	0.105378	0.105368	0.10536	0.105352	0.105345	0.105339
																				0.106994	0.106571	0.10634	0.106179	0.106055	0.105957	0.105877	0.105809	0.105752	0.105703	0.10566	0.105622	0.105589	0.10556	0.105534	0.10551	0.105489	0.10547	0.105453	0.105437	0.105423	0.10541	0.105398	0.105388	0.105378	0.105369	0.10536	0.105353	0.105345	0.105339
																				0.106994	0.106572	0.106341	0.106179	0.106056	0.105957	0.105877	0.105809	0.105752	0.105703	0.10566	0.105622	0.105589	0.10556	0.105534	0.10551	0.105489	0.10547	0.105453	0.105438	0.105423	0.105411	0.105399	0.105388	0.105378	0.105369	0.10536	0.105353	0.105346	0.105339
																				0.106995	0.106572	0.106341	0.106179	0.106056	0.105958	0.105877	0.10581	0.105752	0.105703	0.10566	0.105623	0.10559	0.10556	0.105534	0.105511	0.10549	0.105471	0.105453	0.105438	0.105424	0.105411	0.105399	0.105388	0.105378	0.105369	0.105361	0.105353	0.105346	0.105339
																				0.106995	0.106572	0.106341	0.106179	0.106056	0.105958	0.105877	0.10581	0.105752	0.105703	0.10566	0.105623	0.10559	0.10556	0.105534	0.105511	0.10549	0.105471	0.105453	0.105438	0.105424	0.105411	0.105399	0.105388	0.105378	0.105369	0.105361	0.105353	0.105346	0.105339
																				0.106995	0.106572	0.106341	0.10618	0.106056	0.105958	0.105877	0.10581	0.105753	0.105703	0.10566	0.105623	0.10559	0.10556	0.105534	0.105511	0.10549	0.105471	0.105454	0.105438	0.105424	0.105411	0.105399	0.105388	0.105378	0.105369	0.105361	0.105353	0.105346	0.105339
																				0.106995	0.106572	0.106341	0.106179	0.106056	0.105958	0.105877	0.10581	0.105752	0.105703	0.10566	0.105623	0.10559	0.10556	0.105534	0.105511	0.10549	0.105471	0.105453	0.105438	0.105424	0.105411	0.105399	0.105388	0.105378	0.105369	0.105361	0.105353	0.105346	0.105339
																				0.106995	0.106572	0.106341	0.106179	0.106056	0.105958	0.105877	0.10581	0.105752	0.105703	0.10566	0.105623	0.10559	0.10556	0.105534	0.105511	0.10549	0.105471	0.105453	0.105438	0.105424	0.105411	0.105399	0.105388	0.105378	0.105369	0.105361	0.105353	0.105346	0.105339
																				0.106994	0.106572	0.106341	0.106179	0.106056	0.105957	0.105877	0.105809	0.105752	0.105703	0.10566	0.105622	0.105589	0.10556	0.105534	0.10551	0.105489	0.10547	0.105453	0.105438	0.105423	0.105411	0.105399	0.105388	0.105378	0.105369	0.10536	0.105353	0.105346	0.105339
																				0.106994	0.106571	0.10634	0.106179	0.106055	0.105957	0.105877	0.105809	0.105752	0.105703	0.10566	0.105622	0.105589	0.10556	0.105534	0.10551	0.105489	0.10547	0.105453	0.105437	0.105423	0.10541	0.105398	0.105388	0.105378	0.105369	0.10536	0.105353	0.105345	0.105339
																				0.106993	0.106571	0.10634	0.106178	0.106055	0.105957	0.105876	0.105809	0.105751	0.105702	0.105659	0.105622	0.105589	0.105559	0.105533	0.10551	0.105489	0.10547	0.105453	0.105437	0.105423	0.10541	0.105398	0.105387	0.105378	0.105368	0.10536	0.105352	0.105345	0.105339
																				0.106992	0.10657	0.106339	0.106177	0.106054	0.105956	0.105876	0.105808	0.105751	0.105702	0.105659	0.105621	0.105588	0.105559	0.105533	0.10551	0.105489	0.10547	0.105452	0.105437	0.105423	0.10541	0.105398	0.105387	0.105377	0.105368	0.10536	0.105352	0.105345	0.105338
																				0.106991	0.106569	0.106338	0.106177	0.106053	0.105955	0.105875	0.105808	0.10575	0.105701	0.105658	0.105621	0.105588	0.105559	0.105532	0.105509	0.105488	0.105469	0.105452	0.105436	0.105422	0.105409	0.105398	0.105387	0.105377	0.105368	0.105359	0.105352	0.105345	0.105338
																				0.10699	0.106568	0.106337	0.106176	0.106053	0.105955	0.105874	0.105807	0.10575	0.1057	0.105658	0.10562	0.105587	0.105558	0.105532	0.105509	0.105488	0.105469	0.105452	0.105436	0.105422	0.105409	0.105397	0.105386	0.105377	0.105367	0.105359	0.105351	0.105344	0.105338
																				0.106988	0.106567	0.106336	0.106175	0.106052	0.105954	0.105873	0.105806	0.105749	0.1057	0.105657	0.10562	0.105587	0.105557	0.105531	0.105508	0.105487	0.105468	0.105451	0.105435	0.105421	0.105409	0.105397	0.105386	0.105376	0.105367	0.105359	0.105351	0.105344	0.105337
																				0.106987	0.106565	0.106335	0.106174	0.106051	0.105953	0.105872	0.105805	0.105748	0.105699	0.105656	0.105619	0.105586	0.105557	0.105531	0.105507	0.105486	0.105468	0.10545	0.105435	0.105421	0.105408	0.105396	0.105385	0.105376	0.105367	0.105358	0.105351	0.105344	0.105337
																				0.106985	0.106564	0.106334	0.106172	0.106049	0.105952	0.105871	0.105804	0.105747	0.105698	0.105655	0.105618	0.105585	0.105556	0.10553	0.105507	0.105486	0.105467	0.10545	0.105434	0.10542	0.105407	0.105396	0.105385	0.105375	0.105366	0.105358	0.10535	0.105343	0.105337
																				0.106983	0.106562	0.106332	0.106171	0.106048	0.10595	0.10587	0.105803	0.105746	0.105697	0.105654	0.105617	0.105584	0.105555	0.105529	0.105506	0.105485	0.105466	0.105449	0.105434	0.10542	0.105407	0.105395	0.105384	0.105374	0.105365	0.105357	0.10535	0.105343	0.105336
																				0.106981	0.10656	0.106331	0.106169	0.106047	0.105949	0.105869	0.105802	0.105745	0.105696	0.105653	0.105616	0.105583	0.105554	0.105528	0.105505	0.105484	0.105465	0.105448	0.105433	0.105419	0.105406	0.105394	0.105384	0.105374	0.105365	0.105357	0.105349	0.105342	0.105335
																				0.106979	0.106558	0.106329	0.106168	0.106045	0.105948	0.105867	0.105801	0.105744	0.105695	0.105652	0.105615	0.105582	0.105553	0.105527	0.105504	0.105483	0.105464	0.105447	0.105432	0.105418	0.105405	0.105394	0.105383	0.105373	0.105364	0.105356	0.105348	0.105341	0.105335
																				0.106976	0.106556	0.106327	0.106166	0.106044	0.105946	0.105866	0.105799	0.105742	0.105693	0.105651	0.105614	0.105581	0.105552	0.105526	0.105503	0.105482	0.105463	0.105446	0.105431	0.105417	0.105404	0.105393	0.105382	0.105372	0.105363	0.105355	0.105348	0.105341	0.105334
																				0.106974	0.106554	0.106325	0.106164	0.106042	0.105944	0.105864	0.105798	0.105741	0.105692	0.10565	0.105612	0.10558	0.105551	0.105525	0.105502	0.105481	0.105462	0.105445	0.10543	0.105416	0.105404	0.105392	0.105381	0.105372	0.105363	0.105354	0.105347	0.10534	0.105333
																				0.106971	0.106551	0.106323	0.106162	0.10604	0.105942	0.105863	0.105796	0.105739	0.10569	0.105648	0.105611	0.105578	0.105549	0.105524	0.105501	0.10548	0.105461	0.105444	0.105429	0.105415	0.105403	0.105391	0.10538	0.105371	0.105362	0.105354	0.105346	0.105339	0.105333
																				0.106968	0.106549	0.10632	0.10616	0.106038	0.105941	0.105861	0.105794	0.105738	0.105689	0.105647	0.10561	0.105577	0.105548	0.105522	0.105499	0.105479	0.10546	0.105443	0.105428	0.105414	0.105402	0.10539	0.105379	0.10537	0.105361	0.105353	0.105345	0.105338	0.105332
																				0.106964	0.106546	0.106318	0.106157	0.106036	0.105938	0.105859	0.105792	0.105736	0.105687	0.105645	0.105608	0.105576	0.105547	0.105521	0.105498	0.105477	0.105459	0.105442	0.105427	0.105413	0.1054	0.105389	0.105378	0.105369	0.10536	0.105352	0.105344	0.105337	0.105331
																				0.106961	0.106543	0.106315	0.106155	0.106033	0.105936	0.105857	0.10579	0.105734	0.105685	0.105643	0.105606	0.105574	0.105545	0.10552	0.105497	0.105476	0.105458	0.105441	0.105426	0.105412	0.105399	0.105388	0.105377	0.105368	0.105359	0.105351	0.105343	0.105336	0.10533
																				0.106957	0.10654	0.106312	0.106152	0.106031	0.105934	0.105855	0.105788	0.105732	0.105683	0.105641	0.105605	0.105572	0.105544	0.105518	0.105495	0.105475	0.105456	0.105439	0.105424	0.105411	0.105398	0.105387	0.105376	0.105367	0.105358	0.10535	0.105342	0.105335	0.105329
																				0.106953	0.106537	0.106309	0.10615	0.106028	0.105931	0.105852	0.105786	0.10573	0.105681	0.105639	0.105603	0.10557	0.105542	0.105516	0.105494	0.105473	0.105455	0.105438	0.105423	0.105409	0.105397	0.105385	0.105375	0.105365	0.105357	0.105349	0.105341	0.105334	0.105328
																				0.106949	0.106533	0.106306	0.106147	0.106025	0.105929	0.10585	0.105784	0.105727	0.105679	0.105637	0.105601	0.105569	0.10554	0.105515	0.105492	0.105471	0.105453	0.105436	0.105421	0.105408	0.105395	0.105384	0.105374	0.105364	0.105355	0.105347	0.10534	0.105333	0.105327
																				0.106945	0.106529	0.106302	0.106143	0.106022	0.105926	0.105847	0.105781	0.105725	0.105677	0.105635	0.105599	0.105567	0.105538	0.105513	0.10549	0.10547	0.105451	0.105435	0.10542	0.105406	0.105394	0.105383	0.105372	0.105363	0.105354	0.105346	0.105339	0.105332	0.105326
																				0.10694	0.106525	0.106299	0.10614	0.106019	0.105923	0.105844	0.105778	0.105723	0.105675	0.105633	0.105596	0.105564	0.105536	0.105511	0.105488	0.105468	0.10545	0.105433	0.105418	0.105405	0.105392	0.105381	0.105371	0.105361	0.105353	0.105345	0.105338	0.105331	0.105325
																				0.106935	0.106521	0.106295	0.106137	0.106016	0.10592	0.105841	0.105776	0.10572	0.105672	0.10563	0.105594	0.105562	0.105534	0.105509	0.105486	0.105466	0.105448	0.105431	0.105417	0.105403	0.105391	0.10538	0.105369	0.10536	0.105351	0.105343	0.105336	0.105329	0.105323
																				0.10693	0.106517	0.106291	0.106133	0.106013	0.105917	0.105838	0.105773	0.105717	0.105669	0.105628	0.105592	0.10556	0.105532	0.105507	0.105484	0.105464	0.105446	0.10543	0.105415	0.105401	0.105389	0.105378	0.105368	0.105358	0.10535	0.105342	0.105335	0.105328	0.105322
																				0.106925	0.106512	0.106287	0.106129	0.106009	0.105913	0.105835	0.10577	0.105714	0.105667	0.105625	0.105589	0.105557	0.105529	0.105504	0.105482	0.105462	0.105444	0.105428	0.105413	0.105399	0.105387	0.105376	0.105366	0.105357	0.105348	0.10534	0.105333	0.105327	0.105321
																				0.106919	0.106507	0.106282	0.106125	0.106005	0.10591	0.105832	0.105767	0.105711	0.105664	0.105623	0.105587	0.105555	0.105527	0.105502	0.10548	0.10546	0.105442	0.105426	0.105411	0.105398	0.105385	0.105374	0.105364	0.105355	0.105347	0.105339	0.105332	0.105325	0.105319
																				0.106913	0.106502	0.106278	0.106121	0.106001	0.105906	0.105828	0.105763	0.105708	0.105661	0.10562	0.105584	0.105552	0.105524	0.105499	0.105477	0.105457	0.10544	0.105423	0.105409	0.105396	0.105384	0.105373	0.105362	0.105353	0.105345	0.105337	0.10533	0.105323	0.105317
																				0.106907	0.106497	0.106273	0.106116	0.105997	0.105902	0.105824	0.10576	0.105705	0.105657	0.105617	0.105581	0.105549	0.105522	0.105497	0.105475	0.105455	0.105437	0.105421	0.105407	0.105393	0.105381	0.105371	0.105361	0.105351	0.105343	0.105335	0.105328	0.105322	0.105316
																				0.1069	0.106491	0.106268	0.106111	0.105993	0.105898	0.105821	0.105756	0.105701	0.105654	0.105613	0.105578	0.105546	0.105519	0.105494	0.105472	0.105453	0.105435	0.105419	0.105404	0.105391	0.105379	0.105368	0.105359	0.105349	0.105341	0.105333	0.105326	0.10532	0.105314
																				0.106893	0.106485	0.106262	0.106106	0.105988	0.105894	0.105816	0.105752	0.105697	0.105651	0.10561	0.105575	0.105543	0.105516	0.105491	0.105469	0.10545	0.105432	0.105416	0.105402	0.105389	0.105377	0.105366	0.105356	0.105347	0.105339	0.105331	0.105325	0.105318	0.105312
																				0.106886	0.106479	0.106257	0.106101	0.105983	0.105889	0.105812	0.105748	0.105694	0.105647	0.105606	0.105571	0.10554	0.105513	0.105488	0.105467	0.105447	0.10543	0.105414	0.1054	0.105387	0.105375	0.105364	0.105354	0.105345	0.105337	0.105329	0.105322	0.105316	0.10531
																				0.106878	0.106472	0.106251	0.106096	0.105978	0.105884	0.105808	0.105744	0.10569	0.105643	0.105603	0.105568	0.105537	0.10551	0.105485	0.105464	0.105444	0.105427	0.105411	0.105397	0.105384	0.105372	0.105362	0.105352	0.105343	0.105335	0.105327	0.10532	0.105314	0.105308
																				0.10687	0.106465	0.106245	0.10609	0.105973	0.105879	0.105803	0.105739	0.105685	0.105639	0.105599	0.105564	0.105533	0.105506	0.105482	0.105461	0.105441	0.105424	0.105408	0.105394	0.105381	0.10537	0.105359	0.105349	0.105341	0.105332	0.105325	0.105318	0.105312	0.105306
																				0.106862	0.106458	0.106238	0.106084	0.105967	0.105874	0.105798	0.105735	0.105681	0.105635	0.105595	0.10556	0.10553	0.105503	0.105479	0.105457	0.105438	0.105421	0.105405	0.105391	0.105379	0.105367	0.105356	0.105347	0.105338	0.10533	0.105323	0.105316	0.105309	0.105304
																				0.106853	0.106451	0.106231	0.106078	0.105961	0.105869	0.105793	0.10573	0.105676	0.105631	0.105591	0.105556	0.105526	0.105499	0.105475	0.105454	0.105435	0.105418	0.105402	0.105388	0.105376	0.105364	0.105354	0.105344	0.105335	0.105327	0.10532	0.105313	0.105307	0.105301
																				0.106843	0.106443	0.106224	0.106072	0.105955	0.105863	0.105788	0.105725	0.105672	0.105626	0.105587	0.105552	0.105522	0.105495	0.105471	0.10545	0.105431	0.105414	0.105399	0.105385	0.105373	0.105361	0.105351	0.105341	0.105333	0.105325	0.105317	0.105311	0.105305	0.105299
																				0.106834	0.106434	0.106217	0.106065	0.105949	0.105857	0.105782	0.10572	0.105667	0.105621	0.105582	0.105548	0.105518	0.105491	0.105468	0.105447	0.105428	0.105411	0.105396	0.105382	0.10537	0.105358	0.105348	0.105338	0.10533	0.105322	0.105315	0.105308	0.105302	0.105296
																				0.106824	0.106426	0.106209	0.106058	0.105942	0.105851	0.105776	0.105714	0.105661	0.105616	0.105577	0.105543	0.105513	0.105487	0.105464	0.105443	0.105424	0.105407	0.105392	0.105379	0.105366	0.105355	0.105345	0.105335	0.105327	0.105319	0.105312	0.105305	0.105299	0.105293
																				0.106813	0.106417	0.106201	0.10605	0.105936	0.105845	0.10577	0.105708	0.105656	0.105611	0.105572	0.105538	0.105509	0.105483	0.105459	0.105439	0.10542	0.105404	0.105389	0.105375	0.105363	0.105352	0.105341	0.105332	0.105324	0.105316	0.105309	0.105302	0.105296	0.10529
																				0.106802	0.106407	0.106193	0.106042	0.105928	0.105838	0.105764	0.105702	0.10565	0.105606	0.105567	0.105534	0.105504	0.105478	0.105455	0.105434	0.105416	0.1054	0.105385	0.105371	0.105359	0.105348	0.105338	0.105329	0.10532	0.105313	0.105305	0.105299	0.105293	0.105287
																				0.10679	0.106397	0.106184	0.106034	0.105921	0.105831	0.105757	0.105696	0.105644	0.1056	0.105562	0.105528	0.105499	0.105473	0.10545	0.10543	0.105412	0.105395	0.105381	0.105367	0.105355	0.105344	0.105334	0.105325	0.105317	0.105309	0.105302	0.105295	0.105289	0.105284
																				0.106778	0.106387	0.106174	0.106026	0.105913	0.105823	0.10575	0.10569	0.105638	0.105594	0.105556	0.105523	0.105494	0.105468	0.105446	0.105425	0.105407	0.105391	0.105377	0.105363	0.105351	0.10534	0.10533	0.105321	0.105313	0.105305	0.105298	0.105292	0.105286	0.10528
																				0.106765	0.106376	0.106165	0.106017	0.105905	0.105816	0.105743	0.105683	0.105632	0.105588	0.10555	0.105517	0.105489	0.105463	0.105441	0.105421	0.105403	0.105387	0.105372	0.105359	0.105347	0.105336	0.105326	0.105317	0.105309	0.105302	0.105295	0.105288	0.105282	0.105277
																				0.106752	0.106365	0.106154	0.106008	0.105896	0.105808	0.105736	0.105676	0.105625	0.105582	0.105544	0.105512	0.105483	0.105458	0.105436	0.105416	0.105398	0.105382	0.105367	0.105354	0.105343	0.105332	0.105322	0.105313	0.105305	0.105297	0.105291	0.105284	0.105278	0.105273
																				0.106738	0.106353	0.106144	0.105998	0.105887	0.105799	0.105728	0.105668	0.105618	0.105575	0.105538	0.105506	0.105477	0.105452	0.10543	0.10541	0.105393	0.105377	0.105363	0.10535	0.105338	0.105327	0.105318	0.105309	0.105301	0.105293	0.105286	0.10528	0.105274	0.105269
																				0.106723	0.106341	0.106133	0.105988	0.105878	0.105791	0.10572	0.105661	0.105611	0.105568	0.105531	0.105499	0.105471	0.105446	0.105424	0.105405	0.105387	0.105372	0.105358	0.105345	0.105333	0.105323	0.105313	0.105304	0.105296	0.105289	0.105282	0.105275	0.10527	0.105264
																				0.106708	0.106328	0.106121	0.105977	0.105868	0.105781	0.105711	0.105652	0.105603	0.105561	0.105524	0.105492	0.105465	0.10544	0.105418	0.105399	0.105382	0.105366	0.105352	0.105339	0.105328	0.105318	0.105308	0.105299	0.105291	0.105284	0.105277	0.105271	0.105265	0.105259
																				0.106691	0.106314	0.106109	0.105966	0.105858	0.105772	0.105702	0.105644	0.105595	0.105553	0.105517	0.105485	0.105458	0.105434	0.105412	0.105393	0.105376	0.10536	0.105347	0.105334	0.105323	0.105312	0.105303	0.105294	0.105286	0.105279	0.105272	0.105266	0.10526	0.105254
																				0.106675	0.1063	0.106096	0.105954	0.105847	0.105762	0.105693	0.105635	0.105587	0.105545	0.105509	0.105478	0.105451	0.105427	0.105406	0.105387	0.10537	0.105354	0.105341	0.105328	0.105317	0.105306	0.105297	0.105288	0.10528	0.105273	0.105266	0.10526	0.105254	0.105249
																				0.106657	0.106285	0.106083	0.105942	0.105836	0.105752	0.105683	0.105626	0.105578	0.105537	0.105501	0.105471	0.105444	0.10542	0.105399	0.10538	0.105363	0.105348	0.105334	0.105322	0.105311	0.1053	0.105291	0.105282	0.105275	0.105267	0.105261	0.105254	0.105249	0.105243
																				0.106638	0.106269	0.106069	0.10593	0.105824	0.105741	0.105673	0.105616	0.105569	0.105528	0.105493	0.105463	0.105436	0.105412	0.105391	0.105373	0.105356	0.105341	0.105328	0.105315	0.105304	0.105294	0.105285	0.105276	0.105268	0.105261	0.105254	0.105248	0.105242	0.105237
																				0.106619	0.106253	0.106055	0.105916	0.105812	0.105729	0.105662	0.105606	0.105559	0.105519	0.105484	0.105454	0.105428	0.105404	0.105384	0.105365	0.105349	0.105334	0.105321	0.105308	0.105297	0.105287	0.105278	0.105269	0.105262	0.105254	0.105248	0.105241	0.105236	0.10523
																				0.106599	0.106236	0.106039	0.105903	0.105799	0.105717	0.105651	0.105596	0.105549	0.105509	0.105475	0.105445	0.105419	0.105396	0.105376	0.105357	0.105341	0.105326	0.105313	0.105301	0.10529	0.10528	0.105271	0.105262	0.105254	0.105247	0.105241	0.105234	0.105229	0.105223
																				0.106577	0.106218	0.106023	0.105888	0.105786	0.105705	0.105639	0.105585	0.105539	0.105499	0.105465	0.105436	0.10541	0.105387	0.105367	0.105349	0.105333	0.105318	0.105305	0.105293	0.105282	0.105272	0.105263	0.105255	0.105247	0.10524	0.105233	0.105227	0.105221	0.105215
																				0.106555	0.106199	0.106007	0.105873	0.105772	0.105692	0.105627	0.105573	0.105528	0.105489	0.105455	0.105426	0.105401	0.105378	0.105358	0.10534	0.105324	0.10531	0.105297	0.105285	0.105274	0.105264	0.105255	0.105246	0.105239	0.105231	0.105225	0.105218	0.105212	0.105207
																				0.106532	0.10618	0.105989	0.105857	0.105757	0.105678	0.105614	0.105561	0.105516	0.105478	0.105445	0.105416	0.105391	0.105368	0.105348	0.105331	0.105315	0.105301	0.105288	0.105276	0.105265	0.105255	0.105246	0.105237	0.10523	0.105222	0.105216	0.105209	0.105204	0.105198
																				0.106507	0.106159	0.105971	0.105841	0.105742	0.105664	0.105601	0.105548	0.105504	0.105466	0.105433	0.105405	0.10538	0.105358	0.105338	0.105321	0.105305	0.105291	0.105278	0.105266	0.105255	0.105245	0.105236	0.105228	0.10522	0.105213	0.105206	0.1052	0.105194	0.105188
																				0.106482	0.106138	0.105952	0.105823	0.105726	0.105649	0.105587	0.105535	0.105491	0.105454	0.105421	0.105393	0.105369	0.105347	0.105327	0.10531	0.105294	0.10528	0.105267	0.105256	0.105245	0.105235	0.105226	0.105217	0.10521	0.105202	0.105196	0.105189	0.105183	0.105178
																				0.106455	0.106115	0.105932	0.105805	0.105709	0.105633	0.105572	0.105521	0.105477	0.105441	0.105409	0.105381	0.105357	0.105335	0.105316	0.105298	0.105283	0.105269	0.105256	0.105244	0.105234	0.105224	0.105215	0.105206	0.105198	0.105191	0.105184	0.105178	0.105172	0.105166
																				0.106427	0.106092	0.105911	0.105786	0.105691	0.105617	0.105556	0.105506	0.105463	0.105427	0.105395	0.105368	0.105344	0.105322	0.105303	0.105286	0.105271	0.105257	0.105244	0.105232	0.105222	0.105212	0.105203	0.105194	0.105186	0.105179	0.105172	0.105165	0.105159	0.105154
																				0.106398	0.106067	0.105889	0.105766	0.105673	0.105599	0.10554	0.10549	0.105448	0.105412	0.105381	0.105354	0.10533	0.105309	0.10529	0.105273	0.105257	0.105244	0.105231	0.105219	0.105208	0.105198	0.105189	0.105181	0.105173	0.105165	0.105158	0.105152	0.105146	0.10514
																				0.106367	0.106042	0.105866	0.105745	0.105653	0.105581	0.105522	0.105473	0.105432	0.105396	0.105366	0.105339	0.105315	0.105294	0.105275	0.105259	0.105243	0.105229	0.105217	0.105205	0.105194	0.105184	0.105175	0.105166	0.105158	0.105151	0.105144	0.105137	0.105131	0.105125
																				0.106335	0.106015	0.105842	0.105723	0.105633	0.105562	0.105504	0.105455	0.105415	0.10538	0.105349	0.105323	0.105299	0.105279	0.10526	0.105243	0.105228	0.105214	0.105201	0.105189	0.105179	0.105168	0.105159	0.105151	0.105142	0.105135	0.105128	0.105121	0.105115	0.105109
																				0.106302	0.105986	0.105817	0.1057	0.105611	0.105541	0.105484	0.105437	0.105396	0.105362	0.105332	0.105306	0.105282	0.105262	0.105243	0.105226	0.105211	0.105197	0.105184	0.105172	0.105161	0.105151	0.105142	0.105133	0.105125	0.105117	0.10511	0.105103	0.105097	0.105091
																				0.106267	0.105957	0.105791	0.105675	0.105588	0.105519	0.105463	0.105416	0.105377	0.105343	0.105313	0.105287	0.105264	0.105243	0.105225	0.105208	0.105192	0.105178	0.105166	0.105154	0.105143	0.105133	0.105123	0.105114	0.105106	0.105098	0.105091	0.105084	0.105078	0.105071
																				0.10623	0.105926	0.105763	0.105649	0.105564	0.105496	0.105441	0.105395	0.105356	0.105322	0.105292	0.105267	0.105244	0.105223	0.105204	0.105188	0.105172	0.105158	0.105145	0.105134	0.105122	0.105112	0.105103	0.105094	0.105085	0.105077	0.10507	0.105063	0.105056	0.10505
																				0.106192	0.105893	0.105733	0.105622	0.105538	0.105471	0.105417	0.105372	0.105333	0.105299	0.10527	0.105245	0.105222	0.105201	0.105183	0.105166	0.10515	0.105136	0.105123	0.105111	0.1051	0.10509	0.10508	0.105071	0.105062	0.105054	0.105047	0.10504	0.105033	0.105026
																				0.106152	0.105859	0.105702	0.105593	0.105511	0.105445	0.105392	0.105347	0.105308	0.105275	0.105246	0.105221	0.105198	0.105177	0.105159	0.105142	0.105126	0.105112	0.105099	0.105087	0.105075	0.105065	0.105055	0.105046	0.105037	0.105029	0.105021	0.105014	0.105007	0.105001
																				0.10611	0.105823	0.105669	0.105562	0.105481	0.105417	0.105364	0.10532	0.105282	0.105249	0.10522	0.105194	0.105172	0.105151	0.105132	0.105115	0.1051	0.105085	0.105072	0.10506	0.105048	0.105038	0.105028	0.105018	0.105009	0.105001	0.104993	0.104986	0.104979	0.104972
																				0.106066	0.105785	0.105635	0.10553	0.10545	0.105387	0.105334	0.10529	0.105253	0.10522	0.105191	0.105166	0.105143	0.105122	0.105104	0.105086	0.105071	0.105056	0.105043	0.10503	0.105019	0.105008	0.104998	0.104988	0.104979	0.104971	0.104963	0.104955	0.104948	0.104941
																				0.10602	0.105746	0.105598	0.105495	0.105417	0.105354	0.105302	0.105259	0.105221	0.105189	0.10516	0.105135	0.105112	0.105091	0.105072	0.105055	0.105039	0.105024	0.10501	0.104998	0.104986	0.104975	0.104965	0.104955	0.104946	0.104937	0.104929	0.104921	0.104914	0.104907
																				0.105973	0.105704	0.105559	0.105458	0.105381	0.105319	0.105268	0.105225	0.105187	0.105155	0.105126	0.1051	0.105077	0.105056	0.105037	0.10502	0.105004	0.104989	0.104975	0.104962	0.10495	0.104939	0.104928	0.104919	0.104909	0.104901	0.104892	0.104885	0.104877	0.10487
																				0.105923	0.105659	0.105518	0.105418	0.105342	0.105281	0.10523	0.105187	0.10515	0.105118	0.105089	0.105063	0.10504	0.105019	0.104999	0.104982	0.104965	0.10495	0.104936	0.104923	0.104911	0.1049	0.104889	0.104879	0.104869	0.104861	0.104852	0.104844	0.104837	0.10483
																				0.10587	0.105613	0.105474	0.105376	0.105301	0.10524	0.10519	0.105147	0.10511	0.105077	0.105048	0.105022	0.104999	0.104977	0.104958	0.10494	0.104923	0.104908	0.104894	0.104881	0.104868	0.104857	0.104846	0.104836	0.104826	0.104817	0.104809	0.104801	0.104793	0.104786
																				0.105816	0.105564	0.105427	0.105331	0.105257	0.105196	0.105146	0.105103	0.105066	0.105033	0.105004	0.104978	0.104954	0.104932	0.104913	0.104895	0.104878	0.104862	0.104848	0.104834	0.104822	0.10481	0.104799	0.104789	0.104779	0.10477	0.104761	0.104753	0.104745	0.104738
																				0.105759	0.105512	0.105378	0.105283	0.105209	0.105149	0.105099	0.105056	0.105019	0.104986	0.104956	0.10493	0.104906	0.104884	0.104864	0.104845	0.104828	0.104813	0.104798	0.104784	0.104772	0.10476	0.104749	0.104738	0.104728	0.104719	0.10471	0.104702	0.104694	0.104687
																				0.1057	0.105458	0.105326	0.105232	0.105159	0.105099	0.105049	0.105005	0.104968	0.104934	0.104905	0.104878	0.104854	0.104831	0.104811	0.104793	0.104775	0.104759	0.104744	0.104731	0.104718	0.104706	0.104694	0.104684	0.104674	0.104665	0.104656	0.104647	0.10464	0.104632
[truncated: 131 more columns]
