# Supplementary material for: The System’s Point of View applied to Dielectrophoresis in Plate Capacitor and Pointed-versus-Pointed Electrode Chambers
Source: Preprints.org preprint supplement (doi:10.20944/preprints202302.0190.v1), 2023-02-10
Supplement: Supplementary file 2 [file Table 2.xlsx]

## Sheet: Plain vs. Plain_0.1-in-1_conduc
Basic Resistance	Basic Conductance	Mean Resistance	Mean Conductance	k		a_X	a_y	a_Resistance in Route	a_Conductance along trajectory	a_Trajectory length	a_Delta Cond	a_Step width along trajectory	a_Mid-distance	a_norm. Force (Delta Cond./basic/diSTep)		b_X	b_Y	b_Resistance in Routh	b_Conductance along trajectory	b_Trajectory length	b-Delta Cond	b_Step width along trajectory	b_Mid-distance	b_norm. Force (Delta Cond./basic/diSTep)		c_X	c_Y	c_Resistance in Routh	c_Conductance along trajectory	c_Trajectory length	c_Delta Cond	c_Step width along trajectory	c_Mid-distance	c_norm. Force (Delta Cond./basic/diSTep)		d_X	d_Y	d_Resistance in Routh	d_Conductance along trajectory	d_Trajectory length	d_Delta Cond	d_Step width along trajectory	d_Mid-distance	d_norm. Force (Delta Cond./basic/diSTep)		e_X	e_Y	e_Resistance in Routh	e_Conductance along trajectory
1.00001	0.999991	1.05405	0.948728	0.999991		-0.251256	0.40201	1.06903	0.935429	0	0.000306124	0.000457125	0.000228563	0.669678		0	0.40201	1.07149	0.933284	0	0.000333457	0.00045683	0.000228415	0.729944		-0.40201	0.40201	1.05963	0.943727	0	0.000206108	0.00045683	0.000228415	0.451174		0.0100503	0.40201	1.07148	0.933286	0	0.000333429	0.00045683	0.000228415	0.729884		-0.0100503	0	1.05344	0.94927
						-0.251273	0.401553	1.06868	0.935735	0.000457125	0.000306124	0.000457129	0.00068569	0.669673		0	0.401553	1.0711	0.933617	0.00045683	0.000333457	0.00045683	0.000685244	0.729944		-0.40201	0.401553	1.0594	0.943933	0.00045683	0.000206108	0.00045683	0.000685244	0.451174		0.0100505	0.401553	1.0711	0.93362	0.00045683	0.000333429	0.00045683	0.000685245	0.729884		-0.0105071	0	1.05344	0.94927
						-0.251289	0.401096	1.06833	0.936041	0.000914254	0.000306127	0.000457133	0.00114282	0.669673		0	0.401096	1.07072	0.933951	0.000913659	0.000333457	0.00045683	0.00114207	0.729944		-0.40201	0.401096	1.05917	0.944139	0.000913659	0.000206108	0.00045683	0.00114207	0.451174		0.0100508	0.401096	1.07072	0.933953	0.000913659	0.000333429	0.00045683	0.00114207	0.729884		-0.0109639	0	1.05344	0.94927
						-0.251306	0.40064	1.06798	0.936348	0.00137139	0.000306129	0.000457137	0.00159996	0.669673		0	0.40064	1.07034	0.934284	0.00137049	0.000333457	0.00045683	0.0015989	0.729944		-0.40201	0.40064	1.05894	0.944345	0.00137049	0.000206108	0.00045683	0.0015989	0.451174		0.0100511	0.40064	1.07034	0.934286	0.00137049	0.000333429	0.00045683	0.0015989	0.729884		-0.0114207	0	1.05344	0.94927
						-0.251323	0.400183	1.06763	0.936654	0.00182852	0.000306132	0.000457141	0.00205709	0.669673		0	0.400183	1.06996	0.934618	0.00182732	0.000333457	0.00045683	0.00205573	0.729944		-0.40201	0.400183	1.0587	0.944551	0.00182732	0.000206108	0.00045683	0.00205573	0.451174		0.0100514	0.400183	1.06995	0.93462	0.00182732	0.000333429	0.00045683	0.00205573	0.729884		-0.0118776	0	1.05344	0.949271
						-0.25134	0.399726	1.06728	0.93696	0.00228567	0.000306135	0.000457146	0.00251424	0.669673		0	0.399726	1.06957	0.934951	0.00228415	0.000333457	0.00045683	0.00251256	0.729944		-0.40201	0.399726	1.05847	0.944757	0.00228415	0.000206108	0.00045683	0.00251256	0.451174		0.0100517	0.399726	1.06957	0.934953	0.00228415	0.000333429	0.00045683	0.00251256	0.729884		-0.0123344	0	1.05344	0.949271
						-0.251357	0.399269	1.06693	0.937266	0.00274281	0.000306138	0.00045715	0.00297139	0.669673		0	0.399269	1.06919	0.935285	0.00274098	0.000333457	0.00045683	0.00296939	0.729944		-0.40201	0.399269	1.05824	0.944963	0.00274098	0.000206108	0.00045683	0.00296939	0.451174		0.010052	0.399269	1.06919	0.935287	0.00274098	0.000333429	0.00045683	0.00296939	0.729884		-0.0127912	0	1.05344	0.949271
						-0.251374	0.398812	1.06658	0.937572	0.00319996	0.000306141	0.000457155	0.00342854	0.669673		0	0.398812	1.06881	0.935618	0.00319781	0.000333457	0.00045683	0.00342622	0.729944		-0.40201	0.398812	1.05801	0.945169	0.00319781	0.000206108	0.00045683	0.00342622	0.451174		0.0100523	0.398812	1.06881	0.93562	0.00319781	0.000333429	0.00045683	0.00342622	0.729884		-0.0132481	0	1.05344	0.949271
						-0.251391	0.398355	1.06624	0.937878	0.00365712	0.000306145	0.00045716	0.0038857	0.669673		0	0.398355	1.06843	0.935952	0.00365464	0.000333457	0.00045683	0.00388305	0.729944		-0.40201	0.398355	1.05778	0.945375	0.00365464	0.000206108	0.00045683	0.00388305	0.451174		0.0100526	0.398355	1.06843	0.935954	0.00365464	0.000333429	0.00045683	0.00388305	0.729884		-0.0137049	0	1.05344	0.949271
						-0.251408	0.397899	1.06589	0.938184	0.00411428	0.000306148	0.000457166	0.00434286	0.669672		0	0.397899	1.06805	0.936285	0.00411147	0.000333457	0.00045683	0.00433988	0.729944		-0.40201	0.397899	1.05755	0.945582	0.00411147	0.000206108	0.00045683	0.00433988	0.451174		0.0100529	0.397899	1.06805	0.936287	0.00411147	0.000333429	0.00045683	0.00433988	0.729884		-0.0141617	0	1.05344	0.949271
						-0.251426	0.397442	1.06554	0.93849	0.00457144	0.000305453	0.000457172	0.00480003	0.668142		0	0.397442	1.06767	0.936618	0.0045683	0.000333457	0.00045683	0.00479671	0.729944		-0.40201	0.397442	1.05732	0.945788	0.0045683	0.000206108	0.00045683	0.00479671	0.451174		0.0100533	0.397442	1.06767	0.93662	0.0045683	0.000333429	0.00045683	0.00479671	0.729884		-0.0146185	0	1.05344	0.949271
						-0.251443	0.396985	1.06519	0.938796	0.00502861	0.000173853	0.000457178	0.0052572	0.380277		0	0.396985	1.06729	0.936952	0.00502513	0.000190068	0.00045683	0.00525354	0.416064		-0.40201	0.396985	1.05709	0.945994	0.00502513	0.000118595	0.00045683	0.00525354	0.259607		0.0100536	0.396985	1.06729	0.936954	0.00502513	0.000190052	0.00045683	0.00525354	0.416028		-0.0150754	0	1.05344	0.949271
						-0.251461	0.396528	1.065	0.93897	0.00548579	0.000173862	0.000457196	0.00571439	0.380283		0	0.396528	1.06707	0.937142	0.00548196	0.000190068	0.00045683	0.00571037	0.416064		-0.40201	0.396528	1.05696	0.946112	0.00548196	0.000118595	0.00045683	0.00571037	0.259607		0.0100539	0.396528	1.06707	0.937144	0.00548196	0.000190052	0.00045683	0.00571037	0.416028		-0.0155322	0	1.05344	0.949271
						-0.25148	0.396071	1.0648	0.939144	0.00594299	0.000173873	0.000457216	0.0061716	0.380289		0	0.396071	1.06686	0.937332	0.00593878	0.000190068	0.00045683	0.0061672	0.416064		-0.40201	0.396071	1.05682	0.946231	0.00593878	0.000118595	0.00045683	0.0061672	0.259607		0.0100542	0.396071	1.06686	0.937334	0.00593879	0.000190052	0.00045683	0.0061672	0.416028		-0.015989	0	1.05344	0.949271
						-0.251498	0.395614	1.0646	0.939318	0.0064002	0.000173884	0.000457239	0.00662882	0.380295		0	0.395614	1.06664	0.937522	0.00639561	0.000190068	0.00045683	0.00662403	0.416064		-0.40201	0.395614	1.05669	0.94635	0.00639561	0.000118595	0.00045683	0.00662403	0.259607		0.0100546	0.395614	1.06664	0.937524	0.00639562	0.000190052	0.00045683	0.00662403	0.416028		-0.0164459	0	1.05344	0.949271
						-0.251518	0.395158	1.06441	0.939491	0.00685744	0.000173896	0.000457264	0.00708608	0.380301		0	0.395158	1.06643	0.937712	0.00685244	0.000190068	0.00045683	0.00708086	0.416064		-0.40201	0.395158	1.05656	0.946468	0.00685244	0.000118595	0.00045683	0.00708086	0.259607		0.0100549	0.395158	1.06642	0.937714	0.00685245	0.000190052	0.00045683	0.00708086	0.416028		-0.0169027	0	1.05344	0.949271
						-0.251538	0.394701	1.06421	0.939665	0.00731471	0.00017391	0.000457292	0.00754335	0.380307		0	0.394701	1.06621	0.937902	0.00730927	0.000190068	0.00045683	0.00753769	0.416064		-0.40201	0.394701	1.05643	0.946587	0.00730927	0.000118595	0.00045683	0.00753769	0.259607		0.0100553	0.394701	1.06621	0.937904	0.00730928	0.000190052	0.00045683	0.00753769	0.416028		-0.0173595	0	1.05344	0.949271
						-0.251558	0.394244	1.06401	0.939839	0.007772	0.000173924	0.000457324	0.00800066	0.380312		0	0.394244	1.06599	0.938092	0.0077661	0.000190068	0.00045683	0.00799452	0.416064		-0.40201	0.394244	1.05629	0.946705	0.0077661	0.000118595	0.00045683	0.00799452	0.259607		0.0100556	0.394244	1.06599	0.938094	0.00776611	0.000190052	0.00045683	0.00799452	0.416028		-0.0178164	0	1.05344	0.949271
						-0.25158	0.393787	1.06381	0.940013	0.00822932	0.00017394	0.000457359	0.008458	0.380317		0	0.393787	1.06578	0.938282	0.00822293	0.000190068	0.00045683	0.00845135	0.416064		-0.40201	0.393787	1.05616	0.946824	0.00822293	0.000118595	0.00045683	0.00845135	0.259607		0.010056	0.393787	1.06578	0.938284	0.00822293	0.000190052	0.00045683	0.00845135	0.416028		-0.0182732	0	1.05344	0.949271
						-0.251602	0.39333	1.06362	0.940187	0.00868668	0.000173957	0.0004574	0.00891538	0.380321		0	0.39333	1.06556	0.938472	0.00867976	0.000190068	0.00045683	0.00890818	0.416064		-0.40201	0.39333	1.05603	0.946943	0.00867976	0.000118595	0.00045683	0.00890818	0.259607		0.0100564	0.39333	1.06556	0.938474	0.00867976	0.000190052	0.00045683	0.00890818	0.416028		-0.01873	0	1.05344	0.949271
						-0.251624	0.392873	1.06342	0.940361	0.00914408	0.000173976	0.000457446	0.00937281	0.380324		0	0.392873	1.06535	0.938662	0.00913659	0.000190068	0.00045683	0.00936501	0.416064		-0.40201	0.392873	1.0559	0.947061	0.00913659	0.000118595	0.00045683	0.00936501	0.259607		0.0100568	0.392873	1.06534	0.938664	0.00913659	0.000190052	0.00045683	0.00936501	0.416028		-0.0191868	0	1.05344	0.949271
						-0.251648	0.392417	1.06322	0.940535	0.00960153	0.000173058	0.0004575	0.00983028	0.378274		0	0.392417	1.06513	0.938853	0.00959342	0.000190068	0.00045683	0.00982184	0.416064		-0.40201	0.392417	1.05577	0.94718	0.00959342	8.84705e-05	0.00045683	0.00982184	0.193664		0.0100573	0.392417	1.06513	0.938854	0.00959342	0.000190052	0.00045683	0.00982184	0.416028		-0.0196437	0	1.05344	0.949272
						-0.251673	0.39196	1.06303	0.940708	0.010059	0.000122822	0.000457562	0.0102878	0.26843		0	0.39196	1.06491	0.939043	0.0100503	0.000134643	0.00045683	0.0102787	0.294735		-0.40201	0.39196	1.05567	0.947268	0.0100503	8.84705e-05	0.00045683	0.0102787	0.193664		0.0100577	0.39196	1.06491	0.939044	0.0100503	0.000134631	0.00045683	0.0102787	0.294709		-0.0201005	0	1.05344	0.949272
						-0.251699	0.391503	1.06289	0.940831	0.0105166	0.000122831	0.000457587	0.0107454	0.268433		0	0.391503	1.06476	0.939177	0.0105071	0.000134643	0.00045683	0.0107355	0.294735		-0.40201	0.391503	1.05557	0.947357	0.0105071	8.84705e-05	0.00045683	0.0107355	0.193664		0.0100582	0.391503	1.06476	0.939179	0.0105071	0.000134631	0.00045683	0.0107355	0.294709		-0.0205573	0	1.05344	0.949272
						-0.251725	0.391046	1.06275	0.940954	0.0109742	0.000122839	0.000457614	0.011203	0.268437		0	0.391046	1.06461	0.939312	0.0109639	0.000134643	0.00045683	0.0111923	0.294735		-0.40201	0.391046	1.05547	0.947445	0.0109639	8.84705e-05	0.00045683	0.0111923	0.193664		0.0100587	0.391046	1.06461	0.939314	0.0109639	0.000134631	0.00045683	0.0111923	0.294709		-0.0210142	0	1.05344	0.949272
						-0.251752	0.390589	1.06261	0.941077	0.0114318	0.000122849	0.000457643	0.0116606	0.26844		0	0.390589	1.06446	0.939447	0.0114207	0.000134643	0.00045683	0.0116492	0.294735		-0.40201	0.390589	1.05537	0.947534	0.0114207	8.84705e-05	0.00045683	0.0116492	0.193664		0.0100592	0.390589	1.06445	0.939448	0.0114207	0.000134631	0.00045683	0.0116492	0.294709		-0.021471	0	1.05344	0.949272
						-0.251779	0.390132	1.06247	0.941199	0.0118894	0.000122858	0.000457675	0.0121183	0.268443		0	0.390132	1.0643	0.939581	0.0118776	0.000134643	0.00045683	0.012106	0.294735		-0.40201	0.390132	1.05527	0.947622	0.0118776	8.84705e-05	0.00045683	0.012106	0.193664		0.0100597	0.390132	1.0643	0.939583	0.0118776	0.000134631	0.00045683	0.012106	0.294709		-0.0219278	0	1.05344	0.949272
						-0.251807	0.389676	1.06234	0.941322	0.0123471	0.000122869	0.000457708	0.012576	0.268445		0	0.389676	1.06415	0.939716	0.0123344	0.000134643	0.00045683	0.0125628	0.294735		-0.40201	0.389676	1.05517	0.947711	0.0123344	8.84705e-05	0.00045683	0.0125628	0.193664		0.0100602	0.389676	1.06415	0.939718	0.0123344	0.000134631	0.00045683	0.0125628	0.294709		-0.0223847	0	1.05344	0.949272
						-0.251835	0.389219	1.0622	0.941445	0.0128048	0.000122879	0.000457745	0.0130337	0.268448		0	0.389219	1.064	0.93985	0.0127912	0.000134643	0.00045683	0.0130196	0.294735		-0.40201	0.389219	1.05508	0.947799	0.0127912	8.84705e-05	0.00045683	0.0130196	0.193664		0.0100607	0.389219	1.064	0.939852	0.0127912	0.000134631	0.00045683	0.0130196	0.294709		-0.0228415	0	1.05344	0.949272
						-0.251864	0.388762	1.06206	0.941568	0.0132626	0.000122891	0.000457784	0.0134915	0.26845		0	0.388762	1.06385	0.939985	0.0132481	0.000134643	0.00045683	0.0134765	0.294735		-0.40201	0.388762	1.05498	0.947888	0.0132481	8.84705e-05	0.00045683	0.0134765	0.193664		0.0100612	0.388762	1.06384	0.939987	0.0132481	0.000134631	0.00045683	0.0134765	0.294709		-0.0232983	0	1.05344	0.949272
						-0.251894	0.388305	1.06192	0.941691	0.0137203	0.000122903	0.000457827	0.0139493	0.268451		0	0.388305	1.06369	0.94012	0.0137049	0.000134643	0.00045683	0.0139333	0.294735		-0.40201	0.388305	1.05488	0.947976	0.0137049	8.84705e-05	0.00045683	0.0139333	0.193664		0.0100618	0.388305	1.06369	0.940122	0.0137049	0.000134631	0.00045683	0.0139333	0.294709		-0.0237551	0	1.05344	0.949272
						-0.251924	0.387848	1.06178	0.941814	0.0141782	0.000122513	0.000457873	0.0144071	0.267572		0	0.387848	1.06354	0.940254	0.0141617	0.000134643	0.00045683	0.0143901	0.294735		-0.40201	0.387848	1.05478	0.948064	0.0141617	8.84705e-05	0.00045683	0.0143901	0.193664		0.0100623	0.387848	1.06354	0.940256	0.0141617	0.000134631	0.00045683	0.0143901	0.294709		-0.024212	0	1.05344	0.949272
						-0.251955	0.387392	1.06164	0.941936	0.014636	0.000122115	0.000457924	0.014865	0.266674		0	0.387392	1.06339	0.940389	0.0146185	0.000134643	0.00045683	0.014847	0.294735		-0.40201	0.387392	1.05468	0.948153	0.0146185	8.84705e-05	0.00045683	0.014847	0.193664		0.0100629	0.387392	1.06339	0.940391	0.0146186	0.000134631	0.00045683	0.014847	0.294709		-0.0246688	0	1.05344	0.949273
						-0.251986	0.386935	1.06151	0.942058	0.015094	9.38831e-05	0.000457979	0.015323	0.204996		0	0.386935	1.06324	0.940524	0.0150754	0.000103203	0.00045683	0.0153038	0.225913		-0.40201	0.386935	1.05458	0.948241	0.0150754	6.73295e-05	0.00045683	0.0153038	0.147386		0.0100635	0.386935	1.06324	0.940525	0.0150754	0.000103193	0.00045683	0.0153038	0.225891		-0.0251256	0	1.05344	0.949273
						-0.252019	0.386478	1.0614	0.942152	0.015552	9.38907e-05	0.000458011	0.015781	0.204998		0	0.386478	1.06312	0.940627	0.0155322	0.000103203	0.00045683	0.0157606	0.225913		-0.40201	0.386478	1.05451	0.948309	0.0155322	6.73295e-05	0.00045683	0.0157606	0.147386		0.0100641	0.386478	1.06312	0.940629	0.0155322	0.000103193	0.00045683	0.0157606	0.225892		-0.0255825	0	1.05344	0.949273
						-0.252052	0.386021	1.06129	0.942246	0.01601	9.38985e-05	0.000458045	0.016239	0.205001		0	0.386021	1.063	0.94073	0.015989	0.000103203	0.00045683	0.0162175	0.225913		-0.40201	0.386021	1.05443	0.948376	0.015989	6.73295e-05	0.00045683	0.0162175	0.147386		0.0100647	0.386021	1.063	0.940732	0.015989	0.000103193	0.00045683	0.0162175	0.225892		-0.0260393	0	1.05344	0.949273
						-0.252085	0.385564	1.06119	0.94234	0.016468	9.39068e-05	0.00045808	0.016697	0.205003		0	0.385564	1.06289	0.940833	0.0164459	0.000103203	0.00045683	0.0166743	0.225913		-0.40201	0.385564	1.05436	0.948443	0.0164459	6.73295e-05	0.00045683	0.0166743	0.147386		0.0100653	0.385564	1.06289	0.940835	0.0164459	0.000103193	0.00045683	0.0166743	0.225892		-0.0264961	0	1.05344	0.949273
						-0.252119	0.385107	1.06108	0.942434	0.0169261	9.39153e-05	0.000458118	0.0171551	0.205005		0	0.385107	1.06277	0.940937	0.0169027	0.000103203	0.00045683	0.0171311	0.225913		-0.40201	0.385107	1.05428	0.948511	0.0169027	6.73295e-05	0.00045683	0.0171311	0.147386		0.0100659	0.385107	1.06277	0.940938	0.0169027	0.000103193	0.00045683	0.0171311	0.225892		-0.0269529	0	1.05344	0.949273
						-0.252153	0.384651	1.06098	0.942528	0.0173842	9.39243e-05	0.000458157	0.0176133	0.205006		0	0.384651	1.06265	0.94104	0.0173595	0.000103203	0.00045683	0.0175879	0.225913		-0.40201	0.384651	1.05421	0.948578	0.0173595	6.73295e-05	0.00045683	0.0175879	0.147386		0.0100665	0.384651	1.06265	0.941041	0.0173595	0.000103193	0.00045683	0.0175879	0.225892		-0.0274098	0	1.05344	0.949273
						-0.252188	0.384194	1.06087	0.942622	0.0178424	9.39337e-05	0.0004582	0.0180715	0.205008		0	0.384194	1.06254	0.941143	0.0178164	0.000103203	0.00045683	0.0180448	0.225913		-0.40201	0.384194	1.05413	0.948645	0.0178164	6.73295e-05	0.00045683	0.0180448	0.147386		0.0100672	0.384194	1.06254	0.941145	0.0178164	0.000103193	0.00045683	0.0180448	0.225892		-0.0278666	0	1.05344	0.949273
						-0.252224	0.383737	1.06077	0.942716	0.0183006	9.39435e-05	0.000458245	0.0185297	0.205009		0	0.383737	1.06242	0.941246	0.0182732	0.000103203	0.00045683	0.0185016	0.225913		-0.40201	0.383737	1.05406	0.948713	0.0182732	6.73295e-05	0.00045683	0.0185016	0.147386		0.0100678	0.383737	1.06242	0.941248	0.0182732	0.000103193	0.00045683	0.0185016	0.225892		-0.0283234	0	1.05344	0.949273
						-0.25226	0.38328	1.06066	0.94281	0.0187588	9.37862e-05	0.000458293	0.018988	0.204644		0	0.38328	1.0623	0.941349	0.01873	0.000103203	0.00045683	0.0189584	0.225913		-0.40201	0.38328	1.05399	0.94878	0.01873	6.73295e-05	0.00045683	0.0189584	0.147386		0.0100685	0.38328	1.0623	0.941351	0.01873	0.000103193	0.00045683	0.0189584	0.225892		-0.0287803	0	1.05344	0.949273
						-0.252296	0.382823	1.06055	0.942904	0.0192171	9.33084e-05	0.000458344	0.0194463	0.203579		0	0.382823	1.06219	0.941453	0.0191868	0.000103203	0.00045683	0.0194153	0.225913		-0.40201	0.382823	1.05391	0.948847	0.0191868	6.73295e-05	0.00045683	0.0194153	0.147386		0.0100692	0.382823	1.06219	0.941454	0.0191869	0.000103193	0.00045683	0.0194153	0.225892		-0.0292371	0	1.05344	0.949274
						-0.252333	0.382366	1.06045	0.942997	0.0196754	9.33189e-05	0.000458399	0.0199046	0.203578		0	0.382366	1.06207	0.941556	0.0196437	0.000103203	0.00045683	0.0198721	0.225913		-0.40201	0.382366	1.05384	0.948915	0.0196437	6.73295e-05	0.00045683	0.0198721	0.147386		0.0100699	0.382366	1.06207	0.941557	0.0196437	0.000103193	0.00045683	0.0198721	0.225892		-0.0296939	0	1.05344	0.949274
						-0.252371	0.38191	1.06034	0.94309	0.0201338	7.49353e-05	0.000458457	0.0203631	0.163452		0	0.38191	1.06196	0.941659	0.0201005	8.26083e-05	0.00045683	0.0203289	0.180831		-0.40201	0.38191	1.05376	0.948982	0.0201005	5.53257e-05	0.00045683	0.0203289	0.121109		0.0100706	0.38191	1.06195	0.941661	0.0201005	8.25999e-05	0.00045683	0.0203289	0.180813		-0.0301508	0	1.05344	0.949274
						-0.25241	0.381453	1.06026	0.943165	0.0205923	7.49425e-05	0.000458496	0.0208215	0.163454		0	0.381453	1.06186	0.941742	0.0205573	8.26083e-05	0.00045683	0.0207857	0.180831		-0.40201	0.381453	1.0537	0.949037	0.0205573	5.53257e-05	0.00045683	0.0207857	0.121109		0.0100713	0.381453	1.06186	0.941743	0.0205573	8.26004e-05	0.00045683	0.0207858	0.180814		-0.0306076	0	1.05344	0.949274
						-0.252449	0.380996	1.06018	0.94324	0.0210508	7.49499e-05	0.000458537	0.0212801	0.163456		0	0.380996	1.06177	0.941824	0.0210142	8.26083e-05	0.00045683	0.0212426	0.180831		-0.40201	0.380996	1.05364	0.949093	0.0210142	5.53257e-05	0.00045683	0.0212426	0.121109		0.010072	0.380996	1.06177	0.941826	0.0210142	8.26004e-05	0.00045683	0.0212426	0.180814		-0.0310644	0	1.05344	0.949274
						-0.252488	0.380539	1.06009	0.943315	0.0215093	7.49576e-05	0.00045858	0.0217386	0.163458		0	0.380539	1.06168	0.941907	0.021471	8.26083e-05	0.00045683	0.0216994	0.180831		-0.40201	0.380539	1.05358	0.949148	0.021471	5.53257e-05	0.00045683	0.0216994	0.121109		0.0100727	0.380539	1.06167	0.941908	0.021471	8.26004e-05	0.00045683	0.0216994	0.180814		-0.0315212	0	1.05344	0.949274
						-0.252528	0.380082	1.06001	0.94339	0.0219679	7.49657e-05	0.000458624	0.0221972	0.163459		0	0.380082	1.06158	0.941989	0.0219278	8.26083e-05	0.00045683	0.0221562	0.180831		-0.40201	0.380082	1.05352	0.949203	0.0219278	5.53257e-05	0.00045683	0.0221562	0.121109		0.0100735	0.380082	1.06158	0.941991	0.0219278	8.26004e-05	0.00045683	0.0221562	0.180814		-0.0319781	0	1.05344	0.949274
						-0.252569	0.379625	1.05992	0.943465	0.0224265	7.4974e-05	0.000458672	0.0226559	0.16346		0	0.379625	1.06149	0.942072	0.0223847	8.26083e-05	0.00045683	0.0226131	0.180831		-0.40201	0.379625	1.05345	0.949259	0.0223847	5.53257e-05	0.00045683	0.0226131	0.121109		0.0100742	0.379625	1.06149	0.942074	0.0223847	8.26004e-05	0.00045683	0.0226131	0.180814		-0.0324349	0	1.05344	0.949274
						-0.25261	0.379169	1.05984	0.94354	0.0228852	7.49826e-05	0.000458722	0.0231146	0.163462		0	0.379169	1.0614	0.942155	0.0228415	8.26083e-05	0.00045683	0.0230699	0.180831		-0.40201	0.379169	1.05339	0.949314	0.0228415	5.53257e-05	0.00045683	0.0230699	0.121109		0.010075	0.379169	1.0614	0.942156	0.0228415	8.26004e-05	0.00045683	0.0230699	0.180814		-0.0328917	0	1.05344	0.949275
						-0.252652	0.378712	1.05975	0.943615	0.0233439	7.49179e-05	0.000458774	0.0235733	0.163302		0	0.378712	1.0613	0.942237	0.0232983	8.26083e-05	0.00045683	0.0235267	0.180831		-0.40201	0.378712	1.05333	0.949369	0.0232983	5.53257e-05	0.00045683	0.0235267	0.121109		0.0100758	0.378712	1.0613	0.942239	0.0232983	8.26004e-05	0.00045683	0.0235267	0.180814		-0.0333486	0	1.05344	0.949275
						-0.252694	0.378255	1.05967	0.94369	0.0238027	7.4452e-05	0.000458829	0.0240321	0.162267		0	0.378255	1.06121	0.94232	0.0237551	8.26083e-05	0.00045683	0.0239836	0.180831		-0.40201	0.378255	1.05327	0.949425	0.0237551	5.53257e-05	0.00045683	0.0239836	0.121109		0.0100766	0.378255	1.06121	0.942321	0.0237552	8.26004e-05	0.00045683	0.0239836	0.180814		-0.0338054	0	1.05344	0.949275
						-0.252737	0.377798	1.05959	0.943764	0.0242615	7.44611e-05	0.000458888	0.024491	0.162266		0	0.377798	1.06112	0.942402	0.024212	8.26083e-05	0.00045683	0.0244404	0.180831		-0.40201	0.377798	1.05321	0.94948	0.024212	5.53257e-05	0.00045683	0.0244404	0.121109		0.0100774	0.377798	1.06112	0.942404	0.024212	8.26004e-05	0.00045683	0.0244404	0.180814		-0.0342622	0	1.05344	0.949275
						-0.25278	0.377341	1.0595	0.943839	0.0247204	7.44705e-05	0.00045895	0.0249499	0.162264		0	0.377341	1.06102	0.942485	0.0246688	8.26083e-05	0.00045683	0.0248972	0.180831		-0.40201	0.377341	1.05315	0.949535	0.0246688	5.53257e-05	0.00045683	0.0248972	0.121109		0.0100782	0.377341	1.06102	0.942487	0.0246688	8.26004e-05	0.00045683	0.0248972	0.180814		-0.034719	0	1.05344	0.949275
						-0.252824	0.376884	1.05942	0.943913	0.0251794	6.15233e-05	0.000459015	0.0254089	0.134034		0	0.376884	1.06093	0.942568	0.0251256	6.79818e-05	0.00045683	0.025354	0.148814		-0.40201	0.376884	1.05309	0.949591	0.0251256	4.68062e-05	0.00045683	0.025354	0.10246		0.010079	0.376884	1.06093	0.942569	0.0251256	6.79745e-05	0.00045683	0.0253541	0.148797		-0.0351759	0	1.05344	0.949275
						-0.252869	0.376428	1.05935	0.943975	0.0256384	6.15302e-05	0.000459062	0.0258679	0.134036		0	0.376428	1.06086	0.942636	0.0255825	6.79818e-05	0.00045683	0.0258109	0.148814		-0.40201	0.376428	1.05303	0.949637	0.0255825	4.68062e-05	0.00045683	0.0258109	0.10246		0.0100798	0.376428	1.06085	0.942637	0.0255825	6.79751e-05	0.00045683	0.0258109	0.148799		-0.0356327	0	1.05344	0.949275
						-0.252914	0.375971	1.05928	0.944036	0.0260974	6.15374e-05	0.000459111	0.026327	0.134037		0	0.375971	1.06078	0.942704	0.0260393	6.79818e-05	0.00045683	0.0262677	0.148814		-0.40201	0.375971	1.05298	0.949684	0.0260393	4.68062e-05	0.00045683	0.0262677	0.10246		0.0100807	0.375971	1.06078	0.942705	0.0260393	6.79751e-05	0.00045683	0.0262677	0.148799		-0.0360895	0	1.05343	0.949276
						-0.25296	0.375514	1.05921	0.944098	0.0265566	6.15448e-05	0.000459162	0.0267861	0.134038		0	0.375514	1.0607	0.942772	0.0264961	6.79818e-05	0.00045683	0.0267245	0.148814		-0.40201	0.375514	1.05293	0.949731	0.0264961	4.68062e-05	0.00045683	0.0267245	0.10246		0.0100815	0.375514	1.0607	0.942773	0.0264961	6.79751e-05	0.00045683	0.0267246	0.148799		-0.0365464	0	1.05343	0.949276
						-0.253006	0.375057	1.05914	0.944159	0.0270157	6.15524e-05	0.000459215	0.0272453	0.13404		0	0.375057	1.06063	0.94284	0.0269529	6.79818e-05	0.00045683	0.0271814	0.148814		-0.40201	0.375057	1.05288	0.949778	0.0269529	4.68062e-05	0.00045683	0.0271814	0.10246		0.0100824	0.375057	1.06062	0.942841	0.026953	6.79751e-05	0.00045683	0.0271814	0.148799		-0.0370032	0	1.05343	0.949276
						-0.253053	0.3746	1.05907	0.944221	0.0274749	6.15603e-05	0.00045927	0.0277046	0.134041		0	0.3746	1.06055	0.942908	0.0274098	6.79818e-05	0.00045683	0.0276382	0.148814		-0.40201	0.3746	1.05283	0.949825	0.0274098	4.68062e-05	0.00045683	0.0276382	0.10246		0.0100833	0.3746	1.06055	0.942909	0.0274098	6.79751e-05	0.00045683	0.0276382	0.148799		-0.03746	0	1.05343	0.949276
						-0.2531	0.374143	1.05901	0.944282	0.0279342	6.15087e-05	0.000459329	0.0281639	0.133911		0	0.374143	1.06047	0.942976	0.0278666	6.79818e-05	0.00045683	0.028095	0.148814		-0.40201	0.374143	1.05277	0.949871	0.0278666	4.68062e-05	0.00045683	0.028095	0.10246		0.0100841	0.374143	1.06047	0.942977	0.0278666	6.79751e-05	0.00045683	0.028095	0.148799		-0.0379169	0	1.05343	0.949276
						-0.253148	0.373687	1.05894	0.944344	0.0283935	6.11069e-05	0.00045939	0.0286232	0.133019		0	0.373687	1.0604	0.943043	0.0283234	6.79818e-05	0.00045683	0.0285519	0.148814		-0.40201	0.373687	1.05272	0.949918	0.0283234	4.68062e-05	0.00045683	0.0285519	0.10246		0.010085	0.373687	1.06039	0.943045	0.0283235	6.79751e-05	0.00045683	0.0285519	0.148799		-0.0383737	0	1.05343	0.949276
						-0.253196	0.37323	1.05887	0.944405	0.0288529	6.11151e-05	0.000459454	0.0290826	0.133018		0	0.37323	1.06032	0.943111	0.0287803	6.79818e-05	0.00045683	0.0290087	0.148814		-0.40201	0.37323	1.05267	0.949965	0.0287803	4.68062e-05	0.00045683	0.0290087	0.10246		0.0100859	0.37323	1.06032	0.943113	0.0287803	6.79751e-05	0.000456831	0.0290087	0.148799		-0.0388305	0	1.05343	0.949276
						-0.253245	0.372773	1.0588	0.944466	0.0293124	6.11237e-05	0.000459521	0.0295421	0.133017		0	0.372773	1.06024	0.943179	0.0292371	6.79818e-05	0.00045683	0.0294655	0.148814		-0.40201	0.372773	1.05262	0.950012	0.0292371	4.68062e-05	0.00045683	0.0294655	0.10246		0.0100869	0.372773	1.06024	0.943181	0.0292371	6.79751e-05	0.000456831	0.0294655	0.148799		-0.0392873	0	1.05343	0.949277
						-0.253295	0.372316	1.05873	0.944527	0.0297719	6.11325e-05	0.000459591	0.0300017	0.133016		0	0.372316	1.06017	0.943247	0.0296939	6.79818e-05	0.00045683	0.0299223	0.148814		-0.40201	0.372316	1.05257	0.950059	0.0296939	4.09512e-05	0.00045683	0.0299223	0.0896429		0.0100878	0.372316	1.06017	0.943249	0.029694	6.79751e-05	0.000456831	0.0299224	0.148799		-0.0397442	0	1.05343	0.949277
						-0.253345	0.371859	1.05866	0.944588	0.0302315	5.15446e-05	0.000459665	0.0304613	0.112136		0	0.371859	1.06009	0.943315	0.0301508	5.70796e-05	0.00045683	0.0303792	0.124948		-0.40201	0.371859	1.05252	0.9501	0.0301508	4.09512e-05	0.00045683	0.0303792	0.0896429		0.0100887	0.371859	1.06009	0.943317	0.0301508	5.7073e-05	0.000456831	0.0303792	0.124934		-0.040201	0	1.05343	0.949277
						-0.253396	0.371402	1.0586	0.94464	0.0306912	5.15515e-05	0.000459721	0.030921	0.112137		0	0.371402	1.06003	0.943373	0.0306076	5.70796e-05	0.00045683	0.030836	0.124948		-0.40201	0.371402	1.05248	0.950141	0.0306076	4.09512e-05	0.00045683	0.030836	0.0896429		0.0100897	0.371402	1.06003	0.943374	0.0306076	5.70736e-05	0.000456831	0.030836	0.124935		-0.0406578	0	1.05343	0.949277
						-0.253448	0.370946	1.05855	0.944691	0.0311509	5.15586e-05	0.00045978	0.0313808	0.112139		0	0.370946	1.05996	0.94343	0.0310644	5.70796e-05	0.00045683	0.0312928	0.124948		-0.40201	0.370946	1.05243	0.950182	0.0310644	4.09512e-05	0.00045683	0.0312928	0.0896429		0.0100906	0.370946	1.05996	0.943431	0.0310644	5.70736e-05	0.000456831	0.0312929	0.124935		-0.0411147	0	1.05343	0.949277
						-0.2535	0.370489	1.05849	0.944743	0.0316107	5.15658e-05	0.00045984	0.0318406	0.11214		0	0.370489	1.0599	0.943487	0.0315212	5.70796e-05	0.00045683	0.0317497	0.124948		-0.40201	0.370489	1.05239	0.950222	0.0315212	4.09512e-05	0.00045683	0.0317497	0.0896429		0.0100916	0.370489	1.0599	0.943488	0.0315213	5.70736e-05	0.000456831	0.0317497	0.124935		-0.0415715	0	1.05343	0.949277
						-0.253552	0.370032	1.05843	0.944795	0.0320705	5.15733e-05	0.000459903	0.0323004	0.112141		0	0.370032	1.05983	0.943544	0.0319781	5.70796e-05	0.00045683	0.0322065	0.124948		-0.40201	0.370032	1.05234	0.950263	0.0319781	4.09512e-05	0.00045683	0.0322065	0.0896429		0.0100926	0.370032	1.05983	0.943545	0.0319781	5.70736e-05	0.000456831	0.0322065	0.124935		-0.0420283	0	1.05343	0.949278
						-0.253605	0.369575	1.05837	0.944846	0.0325304	5.14894e-05	0.000459969	0.0327604	0.111942		0	0.369575	1.05977	0.943601	0.0324349	5.70796e-05	0.00045683	0.0326633	0.124948		-0.40201	0.369575	1.05229	0.950304	0.0324349	4.09512e-05	0.00045683	0.0326633	0.0896429		0.0100936	0.369575	1.05977	0.943602	0.0324349	5.70736e-05	0.000456831	0.0326634	0.124935		-0.0424852	0	1.05343	0.949278
						-0.253659	0.369118	1.05832	0.944898	0.0329904	5.11944e-05	0.000460038	0.0332204	0.111284		0	0.369118	1.05971	0.943658	0.0328917	5.70796e-05	0.00045683	0.0331201	0.124948		-0.40201	0.369118	1.05225	0.950345	0.0328917	4.09512e-05	0.00045683	0.0331201	0.0896429		0.0100946	0.369118	1.0597	0.943659	0.0328918	5.70736e-05	0.000456831	0.0331202	0.124935		-0.042942	0	1.05343	0.949278
						-0.253713	0.368661	1.05826	0.944949	0.0334504	5.12021e-05	0.000460109	0.0336805	0.111284		0	0.368661	1.05964	0.943715	0.0333486	5.70796e-05	0.00045683	0.033577	0.124948		-0.40201	0.368661	1.0522	0.950386	0.0333486	4.09512e-05	0.00045683	0.033577	0.0896429		0.0100956	0.368661	1.05964	0.943716	0.0333486	5.70737e-05	0.000456831	0.033577	0.124935		-0.0433988	0	1.05343	0.949278
						-0.253768	0.368205	1.0582	0.945	0.0339105	5.12102e-05	0.000460184	0.0341406	0.111283		0	0.368205	1.05958	0.943772	0.0338054	5.70796e-05	0.00045683	0.0340338	0.124948		-0.40201	0.368205	1.05216	0.950427	0.0338054	4.09512e-05	0.00045683	0.0340338	0.0896429		0.0100966	0.368205	1.05958	0.943773	0.0338054	5.70737e-05	0.000456831	0.0340338	0.124935		-0.0438556	0	1.05343	0.949278
						-0.253824	0.367748	1.05814	0.945051	0.0343707	5.12184e-05	0.000460262	0.0346008	0.111282		0	0.367748	1.05951	0.943829	0.0342622	5.70796e-05	0.00045683	0.0344906	0.124948		-0.40201	0.367748	1.05211	0.950468	0.0342622	4.09512e-05	0.00045683	0.0344906	0.0896429		0.0100977	0.367748	1.05951	0.943831	0.0342623	5.70737e-05	0.000456831	0.0344907	0.124935		-0.0443125	0	1.05343	0.949279
						-0.25388	0.367291	1.05809	0.945102	0.034831	5.1227e-05	0.000460343	0.0350611	0.111281		0	0.367291	1.05945	0.943886	0.034719	5.70796e-05	0.00045683	0.0349475	0.124948		-0.40201	0.367291	1.05207	0.950509	0.034719	4.09512e-05	0.00045683	0.0349475	0.0896429		0.0100987	0.367291	1.05945	0.943888	0.0347191	5.70737e-05	0.000456831	0.0349475	0.124935		-0.0447693	0	1.05343	0.949279
						-0.253936	0.366834	1.05803	0.945154	0.0352913	4.38606e-05	0.000460429	0.0355215	0.0952612		0	0.366834	1.05939	0.943943	0.0351759	4.86517e-05	0.00045683	0.0354043	0.106499		-0.40201	0.366834	1.05202	0.95055	0.0351759	3.54401e-05	0.00045683	0.0354043	0.0775792		0.0100998	0.366834	1.05938	0.943945	0.0351759	4.86456e-05	0.000456831	0.0354043	0.106486		-0.0452261	0	1.05343	0.949279
						-0.253994	0.366377	1.05798	0.945198	0.0357517	4.38674e-05	0.000460495	0.035982	0.0952623		0	0.366377	1.05933	0.943992	0.0356327	4.86517e-05	0.00045683	0.0358611	0.106499		-0.40201	0.366377	1.05198	0.950586	0.0356327	3.54401e-05	0.00045683	0.0358611	0.0775792		0.0101009	0.366377	1.05933	0.943993	0.0356328	4.86464e-05	0.000456831	0.0358612	0.106488		-0.045683	0	1.05343	0.949279
						-0.254052	0.365921	1.05793	0.945241	0.0362122	4.38744e-05	0.000460564	0.0364425	0.0952632		0	0.365921	1.05928	0.944041	0.0360895	4.86517e-05	0.00045683	0.036318	0.106499		-0.40201	0.365921	1.05194	0.950621	0.0360895	3.54401e-05	0.00045683	0.036318	0.0775792		0.010102	0.365921	1.05927	0.944042	0.0360896	4.86464e-05	0.000456831	0.036318	0.106488		-0.0461398	0	1.05343	0.949279
						-0.25411	0.365464	1.05788	0.945285	0.0366728	4.38816e-05	0.000460636	0.0369031	0.0952641		0	0.365464	1.05922	0.944089	0.0365464	4.86517e-05	0.00045683	0.0367748	0.106499		-0.40201	0.365464	1.0519	0.950656	0.0365464	3.54401e-05	0.00045683	0.0367748	0.0775792		0.010103	0.365464	1.05922	0.944091	0.0365464	4.86464e-05	0.000456831	0.0367748	0.106488		-0.0465966	0	1.05343	0.949279
						-0.25417	0.365007	1.05783	0.945329	0.0371334	4.37281e-05	0.00046071	0.0373638	0.0949154		0	0.365007	1.05917	0.944138	0.0370032	4.86517e-05	0.00045683	0.0372316	0.106499		-0.40201	0.365007	1.05187	0.950692	0.0370032	3.54401e-05	0.00045683	0.0372316	0.0775792		0.0101042	0.365007	1.05917	0.944139	0.0370032	4.86464e-05	0.000456831	0.0372317	0.106488		-0.0470534	0	1.05343	0.94928
						-0.254229	0.36455	1.05778	0.945373	0.0375941	4.35379e-05	0.000460787	0.0378245	0.0944867		0	0.36455	1.05911	0.944187	0.03746	4.86517e-05	0.00045683	0.0376884	0.106499		-0.40201	0.36455	1.05183	0.950727	0.03746	3.54401e-05	0.00045683	0.0376884	0.0775792		0.0101053	0.36455	1.05911	0.944188	0.0374601	4.86464e-05	0.000456831	0.0376885	0.106488		-0.0475103	0	1.05343	0.94928
						-0.254289	0.364093	1.05773	0.945416	0.0380549	4.35453e-05	0.000460867	0.0382854	0.0944864		0	0.364093	1.05906	0.944235	0.0379169	4.86517e-05	0.00045683	0.0381453	0.106499		-0.40201	0.364093	1.05179	0.950763	0.0379169	3.54401e-05	0.00045683	0.0381453	0.0775792		0.0101064	0.364093	1.05906	0.944237	0.0379169	4.86464e-05	0.000456831	0.0381453	0.106488		-0.0479671	0	1.05343	0.94928
						-0.25435	0.363636	1.05769	0.94546	0.0385158	4.35529e-05	0.000460951	0.0387463	0.0944859		0	0.363636	1.059	0.944284	0.0383737	4.86517e-05	0.00045683	0.0386021	0.106499		-0.40201	0.363636	1.05175	0.950798	0.0383737	3.54401e-05	0.00045683	0.0386021	0.0775792		0.0101075	0.363636	1.059	0.944285	0.0383737	4.86464e-05	0.000456831	0.0386022	0.106488		-0.0484239	0	1.05343	0.94928
						-0.254412	0.36318	1.05764	0.945504	0.0389767	4.35608e-05	0.000461038	0.0392073	0.0944852		0	0.36318	1.05895	0.944333	0.0388305	4.86517e-05	0.00045683	0.0390589	0.106499		-0.40201	0.36318	1.05171	0.950834	0.0388305	3.54401e-05	0.00045683	0.0390589	0.0775792		0.0101087	0.36318	1.05895	0.944334	0.0388306	4.86464e-05	0.000456831	0.039059	0.106488		-0.0488808	0	1.05343	0.94928
						-0.254474	0.362723	1.05759	0.945547	0.0394378	4.35689e-05	0.000461128	0.0396683	0.0944843		0	0.362723	1.05889	0.944381	0.0392873	4.86517e-05	0.00045683	0.0395158	0.106499		-0.40201	0.362723	1.05167	0.950869	0.0392873	3.54401e-05	0.00045683	0.0395158	0.0775792		0.0101098	0.362723	1.05889	0.944382	0.0392874	4.86464e-05	0.000456831	0.0395158	0.106488		-0.0493376	0	1.05343	0.949281
						-0.254537	0.362266	1.05754	0.945591	0.0398989	4.35773e-05	0.000461222	0.0401295	0.0944832		0	0.362266	1.05884	0.94443	0.0397442	4.86517e-05	0.00045683	0.0399726	0.106499		-0.40201	0.362266	1.05163	0.950904	0.0397442	3.54401e-05	0.00045683	0.0399726	0.0775792		0.010111	0.362266	1.05884	0.944431	0.0397442	4.86464e-05	0.000456831	0.0399726	0.106488		-0.0497944	0	1.05343	0.949281
						-0.2546	0.361809	1.05749	0.945634	0.0403601	3.77877e-05	0.00046132	0.0405908	0.0819127		0	0.361809	1.05879	0.944478	0.040201	4.19614e-05	0.00045683	0.0404294	0.0918545		-0.40201	0.361809	1.05159	0.95094	0.040201	3.14444e-05	0.00045683	0.0404294	0.0688324		0.0101122	0.361809	1.05878	0.94448	0.0402011	4.19558e-05	0.000456831	0.0404295	0.0918418		-0.0502513	0	1.05343	0.949281
						-0.254665	0.361352	1.05745	0.945672	0.0408215	3.77945e-05	0.0004614	0.0410522	0.0819136		0	0.361352	1.05874	0.94452	0.0406578	4.19614e-05	0.00045683	0.0408862	0.0918545		-0.40201	0.361352	1.05156	0.950971	0.0406578	3.14444e-05	0.00045683	0.0408862	0.0688324		0.0101134	0.361352	1.05874	0.944522	0.0406579	4.19567e-05	0.000456831	0.0408863	0.0918437		-0.0507081	0	1.05343	0.949281
						-0.254729	0.360895	1.05741	0.94571	0.0412829	3.78016e-05	0.000461481	0.0415136	0.0819144		0	0.360895	1.05869	0.944562	0.0411147	4.19614e-05	0.00045683	0.0413431	0.0918545		-0.40201	0.360895	1.05152	0.951003	0.0411147	3.14444e-05	0.00045683	0.0413431	0.0688324		0.0101146	0.360895	1.05869	0.944564	0.0411147	4.19567e-05	0.000456831	0.0413431	0.0918437		-0.0511649	0	1.05343	0.949281
						-0.254795	0.360439	1.05736	0.945748	0.0417443	3.75626e-05	0.000461566	0.0419751	0.0813814		0	0.360439	1.05864	0.944604	0.0415715	4.19614e-05	0.00045683	0.0417999	0.0918545		-0.40201	0.360439	1.05149	0.951034	0.0415715	3.14444e-05	0.00045683	0.0417999	0.0688324		0.0101158	0.360439	1.05864	0.944606	0.0415716	4.19567e-05	0.000456831	0.0418	0.0918437		-0.0516217	0	1.05343	0.949282
						-0.254861	0.359982	1.05732	0.945785	0.0422059	3.74992e-05	0.000461654	0.0424367	0.0812287		0	0.359982	1.0586	0.944646	0.0420283	4.19614e-05	0.00045683	0.0422567	0.0918545		-0.40201	0.359982	1.05145	0.951066	0.0420283	3.14444e-05	0.00045683	0.0422567	0.0688324		0.0101171	0.359982	1.0586	0.944648	0.0420284	4.19567e-05	0.000456831	0.0422568	0.0918437		-0.0520786	0	1.05343	0.949282
						-0.254927	0.359525	1.05728	0.945823	0.0426676	3.75065e-05	0.000461745	0.0428984	0.0812285		0	0.359525	1.05855	0.944688	0.0424852	4.19614e-05	0.00045683	0.0427136	0.0918545		-0.40201	0.359525	1.05142	0.951097	0.0424852	3.14444e-05	0.00045683	0.0427136	0.0688324		0.0101183	0.359525	1.05855	0.94469	0.0424852	4.19567e-05	0.000456831	0.0427136	0.0918437		-0.0525354	0	1.05343	0.949282
						-0.254994	0.359068	1.05724	0.94586	0.0431293	3.75139e-05	0.000461839	0.0433602	0.081228		0	0.359068	1.0585	0.94473	0.042942	4.19614e-05	0.00045683	0.0431704	0.0918545		-0.40201	0.359068	1.05138	0.951129	0.042942	3.14444e-05	0.00045683	0.0431704	0.0688324		0.0101196	0.359068	1.0585	0.944732	0.042942	4.19567e-05	0.000456831	0.0431705	0.0918437		-0.0529922	0	1.05343	0.949282
						-0.255062	0.358611	1.0572	0.945898	0.0435911	3.75216e-05	0.000461937	0.0438221	0.0812274		0	0.358611	1.05846	0.944772	0.0433988	4.19614e-05	0.00045683	0.0436272	0.0918545		-0.40201	0.358611	1.05135	0.95116	0.0433988	3.14444e-05	0.00045683	0.0436272	0.0688324		0.0101208	0.358611	1.05845	0.944773	0.0433989	4.19567e-05	0.000456831	0.0436273	0.0918437		-0.0534491	0	1.05343	0.949283
						-0.255131	0.358154	1.05715	0.945935	0.0440531	3.75295e-05	0.000462039	0.0442841	0.0812266		0	0.358154	1.05841	0.944814	0.0438556	4.19614e-05	0.00045683	0.0440841	0.0918545		-0.40201	0.358154	1.05131	0.951191	0.0438556	3.14444e-05	0.00045683	0.0440841	0.0688324		0.0101221	0.358154	1.05841	0.944815	0.0438557	4.19567e-05	0.000456831	0.0440841	0.0918437		-0.0539059	0	1.05343	0.949283
						-0.2552	0.357698	1.05711	0.945973	0.0445151	3.75376e-05	0.000462144	0.0447462	0.0812257		0	0.357698	1.05836	0.944856	0.0443125	4.19614e-05	0.00045683	0.0445409	0.0918545		-0.40201	0.357698	1.05128	0.951223	0.0443125	3.14444e-05	0.00045683	0.0445409	0.0688324		0.0101234	0.357698	1.05836	0.944857	0.0443125	4.19567e-05	0.000456831	0.044541	0.0918437		-0.0543627	0	1.05343	0.949283
						-0.25527	0.357241	1.05707	0.94601	0.0449773	3.7546e-05	0.000462254	0.0452084	0.0812245		0	0.357241	1.05832	0.944898	0.0447693	4.19614e-05	0.00045683	0.0449977	0.0918545		-0.40201	0.357241	1.05124	0.951254	0.0447693	3.14444e-05	0.00045683	0.0449977	0.0688324		0.0101247	0.357241	1.05831	0.944899	0.0447694	4.19567e-05	0.000456831	0.0449978	0.0918437		-0.0548196	0	1.05343	0.949283
						-0.25534	0.356784	1.05703	0.946048	0.0454395	3.29071e-05	0.000462368	0.0456707	0.0711715		0	0.356784	1.05827	0.94494	0.0452261	3.65401e-05	0.00045683	0.0454545	0.079987		-0.40201	0.356784	1.05121	0.951286	0.0452261	2.81636e-05	0.00045683	0.0454545	0.0616506		0.010126	0.356784	1.05827	0.944941	0.0452262	3.65348e-05	0.000456832	0.0454546	0.079975		-0.0552764	0	1.05343	0.949283
						-0.255412	0.356327	1.05699	0.946081	0.0459019	3.28493e-05	0.000462461	0.0461331	0.0710322		0	0.356327	1.05823	0.944977	0.045683	3.65401e-05	0.00045683	0.0459114	0.079987		-0.40201	0.356327	1.05118	0.951314	0.045683	2.81636e-05	0.00045683	0.0459114	0.0616506		0.0101273	0.356327	1.05823	0.944978	0.045683	3.65358e-05	0.000456832	0.0459115	0.0799772		-0.0557332	0	1.05343	0.949284
						-0.255484	0.35587	1.05696	0.946114	0.0463643	3.26256e-05	0.000462558	0.0465956	0.0705337		0	0.35587	1.05819	0.945013	0.0461398	3.65401e-05	0.00045683	0.0463682	0.079987		-0.40201	0.35587	1.05115	0.951342	0.0461398	2.81636e-05	0.00045683	0.0463682	0.0616506		0.0101287	0.35587	1.05818	0.945014	0.0461399	3.65358e-05	0.000456832	0.0463683	0.0799772		-0.05619	0	1.05343	0.949284
						-0.255556	0.355413	1.05692	0.946146	0.0468269	3.26326e-05	0.000462657	0.0470582	0.0705336		0	0.355413	1.05815	0.94505	0.0465966	3.65401e-05	0.00045683	0.046825	0.079987		-0.40201	0.355413	1.05112	0.95137	0.0465966	2.81636e-05	0.00045683	0.046825	0.0616506		0.01013	0.355413	1.05814	0.945051	0.0465967	3.65358e-05	0.000456832	0.0468251	0.0799772		-0.0566469	0	1.05343	0.949284
						-0.255629	0.354957	1.05688	0.946179	0.0472896	3.26397e-05	0.00046276	0.0475209	0.0705333		0	0.354957	1.0581	0.945086	0.0470534	3.65401e-05	0.00045683	0.0472819	0.079987		-0.40201	0.354957	1.05108	0.951398	0.0470534	2.81636e-05	0.00045683	0.0472819	0.0616506		0.0101314	0.354957	1.0581	0.945087	0.0470535	3.65358e-05	0.000456832	0.0472819	0.0799772		-0.0571037	0	1.05342	0.949284
						-0.255703	0.3545	1.05685	0.946212	0.0477523	3.2647e-05	0.000462867	0.0479837	0.0705329		0	0.3545	1.05806	0.945123	0.0475103	3.65401e-05	0.00045683	0.0477387	0.079987		-0.40201	0.3545	1.05105	0.951427	0.0475103	2.81636e-05	0.00045683	0.0477387	0.0616506		0.0101327	0.3545	1.05806	0.945124	0.0475104	3.65358e-05	0.000456832	0.0477388	0.0799772		-0.0575605	0	1.05342	0.949285
						-0.255778	0.354043	1.05681	0.946244	0.0482152	3.26545e-05	0.000462977	0.0484467	0.0705323		0	0.354043	1.05802	0.945159	0.0479671	3.65401e-05	0.00045683	0.0481955	0.079987		-0.40201	0.354043	1.05102	0.951455	0.0479671	2.81636e-05	0.00045683	0.0481955	0.0616506		0.0101341	0.354043	1.05802	0.945161	0.0479672	3.65358e-05	0.000456832	0.0481956	0.0799772		-0.0580174	0	1.05342	0.949285
						-0.255853	0.353586	1.05677	0.946277	0.0486782	3.26622e-05	0.000463091	0.0489097	0.0705316		0	0.353586	1.05798	0.945196	0.0484239	3.65401e-05	0.00045683	0.0486524	0.079987		-0.40201	0.353586	1.05099	0.951483	0.0484239	2.81636e-05	0.00045683	0.0486524	0.0616506		0.0101355	0.353586	1.05798	0.945197	0.048424	3.65358e-05	0.000456832	0.0486524	0.0799772		-0.0584742	0	1.05342	0.949285
						-0.255929	0.353129	1.05674	0.946309	0.0491413	3.26701e-05	0.000463209	0.0493729	0.0705307		0	0.353129	1.05794	0.945232	0.0488808	3.65401e-05	0.00045683	0.0491092	0.079987		-0.40201	0.353129	1.05096	0.951511	0.0488808	2.81636e-05	0.00045683	0.0491092	0.0616506		0.0101369	0.353129	1.05794	0.945234	0.0488809	3.65358e-05	0.000456832	0.0491093	0.0799772		-0.058931	0	1.05342	0.949285
						-0.256006	0.352672	1.0567	0.946342	0.0496045	3.26782e-05	0.000463331	0.0498361	0.0705296		0	0.352672	1.0579	0.945269	0.0493376	3.65401e-05	0.00045683	0.049566	0.079987		-0.40201	0.352672	1.05093	0.951539	0.0493376	2.81636e-05	0.00045683	0.049566	0.0616506		0.0101383	0.352672	1.0579	0.94527	0.0493377	3.65358e-05	0.000456832	0.0495661	0.0799772		-0.0593878	0	1.05342	0.949286
						-0.256083	0.352216	1.05666	0.946375	0.0500678	3.26866e-05	0.000463458	0.0502995	0.0705282		0	0.352216	1.05786	0.945305	0.0497944	3.65401e-05	0.00045683	0.0500228	0.079987		-0.40201	0.352216	1.0509	0.951567	0.0497944	2.56486e-05	0.00045683	0.0500228	0.0561453		0.0101398	0.352216	1.05786	0.945307	0.0497945	3.65358e-05	0.000456832	0.0500229	0.0799772		-0.0598447	0	1.05342	0.949286
						-0.256161	0.351759	1.05663	0.946408	0.0505312	2.86948e-05	0.000463589	0.050763	0.0618976		0	0.351759	1.05782	0.945342	0.0502513	3.20738e-05	0.00045683	0.0504797	0.0702103		-0.40201	0.351759	1.05087	0.951593	0.0502513	2.56486e-05	0.00045683	0.0504797	0.0561453		0.0101412	0.351759	1.05782	0.945343	0.0502514	3.20811e-05	0.000456832	0.0504798	0.0702259		-0.0603015	0	1.05342	0.949286
						-0.25624	0.351302	1.0566	0.946436	0.0509948	2.86838e-05	0.000463702	0.0512267	0.0618589		0	0.351302	1.05778	0.945374	0.0507081	3.20738e-05	0.00045683	0.0509365	0.0702103		-0.40201	0.351302	1.05084	0.951619	0.0507081	2.56486e-05	0.00045683	0.0509365	0.0561453		0.0101426	0.351302	1.05778	0.945375	0.0507082	3.20822e-05	0.000456832	0.0509366	0.0702283		-0.0607583	0	1.05342	0.949286
						-0.256319	0.350845	1.05656	0.946465	0.0514585	2.87333e-05	0.000463818	0.0516904	0.0619501		0	0.350845	1.05775	0.945406	0.0511649	3.20738e-05	0.00045683	0.0513933	0.0702103		-0.40201	0.350845	1.05081	0.951644	0.0511649	2.56486e-05	0.00045683	0.0513933	0.0561453		0.0101441	0.350845	1.05775	0.945407	0.051165	3.20822e-05	0.000456832	0.0513934	0.0702283		-0.0612152	0	1.05342	0.949287
						-0.2564	0.350388	1.05653	0.946494	0.0519224	2.87413e-05	0.000463938	0.0521543	0.0619513		0	0.350388	1.05771	0.945438	0.0516217	3.20738e-05	0.00045683	0.0518502	0.0702103		-0.40201	0.350388	1.05078	0.95167	0.0516217	2.56486e-05	0.00045683	0.0518502	0.0561453		0.0101456	0.350388	1.05771	0.945439	0.0516218	3.20822e-05	0.000456832	0.0518503	0.0702283		-0.061672	0	1.05342	0.949287
						-0.256481	0.349931	1.0565	0.946522	0.0523863	2.87495e-05	0.000464063	0.0526183	0.0619524		0	0.349931	1.05767	0.94547	0.0520786	3.20738e-05	0.00045683	0.052307	0.0702103		-0.40201	0.349931	1.05076	0.951696	0.0520786	2.56486e-05	0.00045683	0.052307	0.0561453		0.0101471	0.349931	1.05767	0.945472	0.0520787	3.20822e-05	0.000456832	0.0523071	0.0702283		-0.0621288	0	1.05342	0.949287
						-0.256562	0.349475	1.05647	0.946551	0.0528504	2.87579e-05	0.000464191	0.0530825	0.0619534		0	0.349475	1.05764	0.945502	0.0525354	3.20738e-05	0.00045683	0.0527638	0.0702103		-0.40201	0.349475	1.05073	0.951721	0.0525354	2.56486e-05	0.00045683	0.0527638	0.0561453		0.0101486	0.349475	1.05764	0.945504	0.0525355	3.20822e-05	0.000456832	0.0527639	0.0702283		-0.0625857	0	1.05342	0.949288
						-0.256644	0.349018	1.05643	0.94658	0.0533145	2.87666e-05	0.000464324	0.0535467	0.0619542		0	0.349018	1.0576	0.945534	0.0529922	3.20738e-05	0.00045683	0.0532206	0.0702103		-0.40201	0.349018	1.0507	0.951747	0.0529922	2.56486e-05	0.00045683	0.0532206	0.0561453		0.0101501	0.349018	1.0576	0.945536	0.0529923	3.20822e-05	0.000456832	0.0532208	0.0702283		-0.0630425	0	1.05342	0.949288
						-0.256728	0.348561	1.0564	0.946609	0.0537789	2.87754e-05	0.000464461	0.0540111	0.0619549		0	0.348561	1.05757	0.945567	0.0534491	3.20738e-05	0.00045683	0.0536775	0.0702103		-0.40201	0.348561	1.05067	0.951773	0.0534491	2.56486e-05	0.00045683	0.0536775	0.0561453		0.0101516	0.348561	1.05757	0.945568	0.0534492	3.20822e-05	0.000456832	0.0536776	0.0702283		-0.0634993	0	1.05342	0.949288
						-0.256811	0.348104	1.05637	0.946637	0.0542433	2.87844e-05	0.000464603	0.0544756	0.0619554		0	0.348104	1.05753	0.945599	0.0539059	3.20738e-05	0.00045683	0.0541343	0.0702103		-0.40201	0.348104	1.05064	0.951798	0.0539059	2.56486e-05	0.00045683	0.0541343	0.0561453		0.0101531	0.348104	1.05753	0.9456	0.053906	3.20822e-05	0.000456832	0.0541344	0.0702283		-0.0639561	0	1.05342	0.949288
						-0.256896	0.347647	1.05634	0.946666	0.0547079	2.86771e-05	0.00046475	0.0549403	0.0617048		0	0.347647	1.0575	0.945631	0.0543627	3.20738e-05	0.00045683	0.0545911	0.0702103		-0.40201	0.347647	1.05061	0.951824	0.0543627	2.56486e-05	0.00045683	0.0545911	0.0561453		0.0101547	0.347647	1.05749	0.945632	0.0543628	3.20822e-05	0.000456832	0.0545913	0.0702283		-0.064413	0	1.05342	0.949289
						-0.256982	0.34719	1.05631	0.946695	0.0551727	2.85429e-05	0.000464903	0.0554051	0.0613959		0	0.34719	1.05746	0.945663	0.0548196	3.20738e-05	0.00045683	0.055048	0.0702103		-0.40201	0.34719	1.05059	0.95185	0.0548196	2.56486e-05	0.00045683	0.055048	0.0561453		0.0101563	0.34719	1.05746	0.945664	0.0548197	3.20823e-05	0.000456832	0.0550481	0.0702283		-0.0648698	0	1.05342	0.949289
						-0.257068	0.346734	1.05627	0.946723	0.0556376	2.54325e-05	0.00046506	0.0558701	0.0546869		0	0.346734	1.05742	0.945695	0.0552764	2.83564e-05	0.00045683	0.0555048	0.0620727		-0.40201	0.346734	1.05056	0.951875	0.0552764	2.30907e-05	0.00045683	0.0555048	0.050546		0.0101578	0.346734	1.05742	0.945696	0.0552765	2.83391e-05	0.000456832	0.0555049	0.0620344		-0.0653266	0	1.05342	0.949289
						-0.257155	0.346277	1.05625	0.946749	0.0561027	2.54405e-05	0.000465196	0.0563352	0.0546881		0	0.346277	1.05739	0.945723	0.0557332	2.83564e-05	0.00045683	0.0559616	0.0620727		-0.40201	0.346277	1.05053	0.951898	0.0557332	2.30907e-05	0.00045683	0.0559616	0.050546		0.0101594	0.346277	1.05739	0.945724	0.0557333	2.83403e-05	0.000456832	0.0559618	0.0620371		-0.0657835	0	1.05342	0.94929
						-0.257243	0.34582	1.05622	0.946774	0.0565678	2.54487e-05	0.000465336	0.0568005	0.0546892		0	0.34582	1.05736	0.945752	0.05619	2.83564e-05	0.00045683	0.0564185	0.0620727		-0.40201	0.34582	1.05051	0.951921	0.05619	2.30907e-05	0.00045683	0.0564185	0.050546		0.010161	0.34582	1.05736	0.945753	0.0561902	2.83403e-05	0.000456832	0.0564186	0.0620371		-0.0662403	0	1.05342	0.94929
						-0.257331	0.345363	1.05619	0.9468	0.0570332	2.5457e-05	0.000465481	0.0572659	0.0546903		0	0.345363	1.05733	0.94578	0.0566469	2.83564e-05	0.00045683	0.0568753	0.0620727		-0.40201	0.345363	1.05048	0.951945	0.0566469	2.30907e-05	0.00045683	0.0568753	0.050546		0.0101626	0.345363	1.05733	0.945781	0.056647	2.83403e-05	0.000456832	0.0568754	0.0620371		-0.0666971	0	1.05342	0.94929
						-0.257421	0.344906	1.05616	0.946825	0.0574987	2.54656e-05	0.00046563	0.0577315	0.0546911		0	0.344906	1.0573	0.945808	0.0571037	2.83564e-05	0.00045683	0.0573321	0.0620727		-0.40201	0.344906	1.05046	0.951968	0.0571037	2.30907e-05	0.00045683	0.0573321	0.050546		0.0101642	0.344906	1.0573	0.945809	0.0571038	2.83403e-05	0.000456833	0.0573323	0.0620371		-0.067154	0	1.05342	0.94929
						-0.257511	0.34445	1.05613	0.946851	0.0579643	2.54743e-05	0.000465783	0.0581972	0.0546919		0	0.34445	1.05727	0.945837	0.0575605	2.83564e-05	0.00045683	0.0577889	0.0620727		-0.40201	0.34445	1.05043	0.951991	0.0575605	2.30907e-05	0.00045683	0.0577889	0.050546		0.0101659	0.34445	1.05726	0.945838	0.0575607	2.83403e-05	0.000456833	0.0577891	0.0620371		-0.0676108	0	1.05342	0.949291
						-0.257602	0.343993	1.0561	0.946876	0.0584301	2.54833e-05	0.000465942	0.058663	0.0546925		0	0.343993	1.05723	0.945865	0.0580174	2.83564e-05	0.00045683	0.0582458	0.0620727		-0.40201	0.343993	1.0504	0.952014	0.0580174	2.30907e-05	0.00045683	0.0582458	0.050546		0.0101675	0.343993	1.05723	0.945866	0.0580175	2.83403e-05	0.000456833	0.0582459	0.0620371		-0.0680676	0	1.05342	0.949291
						-0.257693	0.343536	1.05608	0.946902	0.058896	2.54364e-05	0.000466106	0.0591291	0.0545726		0	0.343536	1.0572	0.945893	0.0584742	2.83564e-05	0.00045683	0.0587026	0.0620727		-0.40201	0.343536	1.05038	0.952037	0.0584742	2.30907e-05	0.00045683	0.0587026	0.050546		0.0101692	0.343536	1.0572	0.945894	0.0584743	2.83403e-05	0.000456833	0.0587028	0.0620371		-0.0685244	0	1.05342	0.949291
						-0.257786	0.343079	1.05605	0.946927	0.0593621	2.52713e-05	0.000466275	0.0595953	0.0541988		0	0.343079	1.05717	0.945922	0.058931	2.83564e-05	0.00045683	0.0591594	0.0620727		-0.40201	0.343079	1.05035	0.95206	0.058931	2.30907e-05	0.00045683	0.0591594	0.050546		0.0101708	0.343079	1.05717	0.945923	0.0589312	2.83403e-05	0.000456833	0.0591596	0.0620371		-0.0689813	0	1.05342	0.949292
						-0.257879	0.342622	1.05602	0.946952	0.0598284	2.52806e-05	0.00046645	0.0600616	0.0541983		0	0.342622	1.05714	0.94595	0.0593878	2.83564e-05	0.00045683	0.0596163	0.0620727		-0.40201	0.342622	1.05033	0.952083	0.0593878	2.30907e-05	0.00045683	0.0596163	0.050546		0.0101725	0.342622	1.05714	0.945951	0.059388	2.83403e-05	0.000456833	0.0596164	0.0620371		-0.0694381	0	1.05342	0.949292
						-0.257973	0.342165	1.05599	0.946978	0.0602949	2.52901e-05	0.000466631	0.0605282	0.0541976		0	0.342165	1.05711	0.945978	0.0598447	2.83564e-05	0.00045683	0.0600731	0.0620727		-0.40201	0.342165	1.0503	0.952106	0.0598447	2.1255e-05	0.00045683	0.0600731	0.0465276		0.0101742	0.342165	1.05711	0.94598	0.0598448	2.83403e-05	0.000456833	0.0600732	0.0620371		-0.0698949	0	1.05342	0.949292
						-0.258069	0.341709	1.05596	0.947003	0.0607615	2.26879e-05	0.000466818	0.0609949	0.0486015		0	0.341709	1.05707	0.946007	0.0603015	2.51936e-05	0.00045683	0.0605299	0.0551494		-0.40201	0.341709	1.05028	0.952127	0.0603015	2.1255e-05	0.00045683	0.0605299	0.0465276		0.0101759	0.341709	1.05707	0.946008	0.0603017	2.51889e-05	0.000456833	0.0605301	0.0551386		-0.0703518	0	1.05342	0.949293
						-0.258165	0.341252	1.05594	0.947026	0.0612283	2.26964e-05	0.000466983	0.0614618	0.0486026		0	0.341252	1.05705	0.946032	0.0607583	2.51936e-05	0.00045683	0.0609868	0.0551494		-0.40201	0.341252	1.05026	0.952149	0.0607583	2.1255e-05	0.00045683	0.0609868	0.0465276		0.0101777	0.341252	1.05705	0.946033	0.0607585	2.51902e-05	0.000456833	0.0609869	0.0551415		-0.0708086	0	1.05342	0.949293
						-0.258261	0.340795	1.05591	0.947048	0.0616953	2.27051e-05	0.000467153	0.0619289	0.0486035		0	0.340795	1.05702	0.946057	0.0612152	2.51936e-05	0.00045683	0.0614436	0.0551494		-0.40201	0.340795	1.05023	0.95217	0.0612152	2.1255e-05	0.00045683	0.0614436	0.0465276		0.0101794	0.340795	1.05702	0.946058	0.0612153	2.51902e-05	0.000456833	0.0614437	0.0551415		-0.0712654	0	1.05342	0.949293
						-0.258359	0.340338	1.05589	0.947071	0.0621624	2.2714e-05	0.000467328	0.0623961	0.0486043		0	0.340338	1.05699	0.946082	0.061672	2.51936e-05	0.00045683	0.0619004	0.0551494		-0.40201	0.340338	1.05021	0.952191	0.061672	2.1255e-05	0.00045683	0.0619004	0.0465276		0.0101811	0.340338	1.05699	0.946083	0.0616722	2.51902e-05	0.000456833	0.0619006	0.0551415		-0.0717222	0	1.05342	0.949293
						-0.258458	0.339881	1.05586	0.947094	0.0626298	2.2723e-05	0.000467509	0.0628635	0.048605		0	0.339881	1.05696	0.946107	0.0621288	2.51936e-05	0.00045683	0.0623572	0.0551494		-0.40201	0.339881	1.05019	0.952212	0.0621288	2.1255e-05	0.00045683	0.0623572	0.0465276		0.0101829	0.339881	1.05696	0.946109	0.062129	2.51902e-05	0.000456833	0.0623574	0.0551415		-0.0721791	0	1.05341	0.949294
						-0.258557	0.339424	1.05584	0.947116	0.0630973	2.26988e-05	0.000467695	0.0633311	0.0485338		0	0.339424	1.05693	0.946133	0.0625857	2.51936e-05	0.00045683	0.0628141	0.0551494		-0.40201	0.339424	1.05016	0.952234	0.0625857	2.1255e-05	0.00045683	0.0628141	0.0465276		0.0101847	0.339424	1.05693	0.946134	0.0625858	2.51903e-05	0.000456833	0.0628142	0.0551415		-0.0726359	0	1.05341	0.949294
						-0.258657	0.338968	1.05581	0.947139	0.063565	2.25377e-05	0.000467887	0.0637989	0.0481696		0	0.338968	1.05691	0.946158	0.0630425	2.51936e-05	0.00045683	0.0632709	0.0551494		-0.40201	0.338968	1.05014	0.952255	0.0630425	2.1255e-05	0.00045683	0.0632709	0.0465276		0.0101865	0.338968	1.0569	0.946159	0.0630427	2.51903e-05	0.000456833	0.0632711	0.0551415		-0.0730927	0	1.05341	0.949294
						-0.258758	0.338511	1.05579	0.947162	0.0640329	2.25471e-05	0.000468085	0.0642669	0.0481693		0	0.338511	1.05688	0.946183	0.0634993	2.51936e-05	0.00045683	0.0637277	0.0551494		-0.40201	0.338511	1.05012	0.952276	0.0634993	2.1255e-05	0.00045683	0.0637277	0.0465276		0.0101882	0.338511	1.05688	0.946184	0.0634995	2.51903e-05	0.000456833	0.0637279	0.0551416		-0.0735496	0	1.05341	0.949295
						-0.25886	0.338054	1.05576	0.947184	0.0645009	2.25568e-05	0.00046829	0.0647351	0.0481688		0	0.338054	1.05685	0.946208	0.0639561	2.51936e-05	0.00045683	0.0641846	0.0551494		-0.40201	0.338054	1.05009	0.952297	0.0639561	2.1255e-05	0.00045683	0.0641846	0.0465276		0.0101901	0.338054	1.05685	0.946209	0.0639563	2.51903e-05	0.000456833	0.0641847	0.0551416		-0.0740064	0	1.05341	0.949295
						-0.258963	0.337597	1.05574	0.947207	0.0649692	2.25666e-05	0.000468502	0.0652035	0.0481681		0	0.337597	1.05682	0.946233	0.064413	2.51936e-05	0.00045683	0.0646414	0.0551494		-0.40201	0.337597	1.05007	0.952319	0.064413	2.1255e-05	0.00045683	0.0646414	0.0465276		0.0101919	0.337597	1.05682	0.946235	0.0644132	2.51903e-05	0.000456833	0.0646416	0.0551416		-0.0744632	0	1.05341	0.949295
						-0.259067	0.33714	1.05571	0.947229	0.0654377	2.25767e-05	0.00046872	0.0656721	0.0481672		0	0.33714	1.05679	0.946259	0.0648698	2.51936e-05	0.00045683	0.0650982	0.0551494		-0.40201	0.33714	1.05005	0.95234	0.0648698	2.1255e-05	0.00045683	0.0650982	0.0465276		0.0101937	0.33714	1.05679	0.94626	0.06487	2.51903e-05	0.000456833	0.0650984	0.0551416		-0.0749201	0	1.05341	0.949296
						-0.259172	0.336683	1.05569	0.947252	0.0659065	2.03786e-05	0.000468946	0.0661409	0.0434566		0	0.336683	1.05677	0.946284	0.0653266	2.25068e-05	0.00045683	0.065555	0.0492679		-0.40201	0.336683	1.05002	0.952361	0.0653266	1.93477e-05	0.00045683	0.065555	0.0423526		0.0101956	0.336683	1.05676	0.946285	0.0653268	2.25022e-05	0.000456833	0.0655552	0.0492574		-0.0753769	0	1.05341	0.949296
						-0.259278	0.336227	1.05566	0.947272	0.0663754	2.03876e-05	0.000469146	0.06661	0.0434574		0	0.336227	1.05674	0.946306	0.0657835	2.25068e-05	0.00045683	0.0660119	0.0492679		-0.40201	0.336227	1.05	0.952381	0.0657835	1.93477e-05	0.00045683	0.0660119	0.0423526		0.0101974	0.336227	1.05674	0.946307	0.0657837	2.25037e-05	0.000456833	0.0660121	0.0492606		-0.0758337	0	1.05341	0.949296
						-0.259385	0.33577	1.05564	0.947293	0.0668445	2.03969e-05	0.000469351	0.0670792	0.0434581		0	0.33577	1.05672	0.946329	0.0662403	2.25068e-05	0.00045683	0.0664687	0.0492679		-0.40201	0.33577	1.04998	0.9524	0.0662403	1.93477e-05	0.00045683	0.0664687	0.0423526		0.0101993	0.33577	1.05671	0.94633	0.0662405	2.25037e-05	0.000456833	0.0664689	0.0492606		-0.0762905	0	1.05341	0.949297
						-0.259493	0.335313	1.05562	0.947313	0.0673139	2.03675e-05	0.000469563	0.0675487	0.0433759		0	0.335313	1.05669	0.946351	0.0666971	2.25068e-05	0.00045683	0.0669255	0.0492679		-0.40201	0.335313	1.04996	0.952419	0.0666971	1.93477e-05	0.00045683	0.0669255	0.0423526		0.0102012	0.335313	1.05669	0.946352	0.0666973	2.25037e-05	0.000456834	0.0669257	0.0492606		-0.0767474	0	1.05341	0.949297
						-0.259601	0.334856	1.05559	0.947333	0.0677835	2.02356e-05	0.00046978	0.0680183	0.043075		0	0.334856	1.05666	0.946374	0.067154	2.25068e-05	0.00045683	0.0673824	0.0492679		-0.40201	0.334856	1.04994	0.952439	0.067154	1.93477e-05	0.00045683	0.0673824	0.0423526		0.0102031	0.334856	1.05666	0.946375	0.0671542	2.25037e-05	0.000456834	0.0673826	0.0492606		-0.0772042	0	1.05341	0.949298
						-0.259711	0.334399	1.05557	0.947354	0.0682532	2.02452e-05	0.000470005	0.0684882	0.0430748		0	0.334399	1.05664	0.946396	0.0676108	2.25068e-05	0.00045683	0.0678392	0.0492679		-0.40201	0.334399	1.04992	0.952458	0.0676108	1.93477e-05	0.00045683	0.0678392	0.0423526		0.010205	0.334399	1.05664	0.946397	0.067611	2.25037e-05	0.000456834	0.0678394	0.0492606		-0.077661	0	1.05341	0.949298
						-0.259821	0.333942	1.05555	0.947374	0.0687232	2.02549e-05	0.000470236	0.0689584	0.0430743		0	0.333942	1.05661	0.946419	0.0680676	2.25068e-05	0.00045683	0.068296	0.0492679		-0.40201	0.333942	1.04989	0.952477	0.0680676	1.93477e-05	0.00045683	0.068296	0.0423526		0.0102069	0.333942	1.05661	0.94642	0.0680678	2.25037e-05	0.000456834	0.0682962	0.0492606		-0.0781179	0	1.05341	0.949298
						-0.259933	0.333486	1.05553	0.947394	0.0691935	2.02649e-05	0.000470474	0.0694287	0.0430737		0	0.333486	1.05659	0.946441	0.0685244	2.25068e-05	0.00045683	0.0687529	0.0492679		-0.40201	0.333486	1.04987	0.952497	0.0685244	1.93477e-05	0.00045683	0.0687529	0.0423526		0.0102089	0.333486	1.05659	0.946442	0.0685247	2.25037e-05	0.000456834	0.0687531	0.0492606		-0.0785747	0	1.05341	0.949299
						-0.260045	0.333029	1.0555	0.947414	0.069664	2.02751e-05	0.00047072	0.0698993	0.0430729		0	0.333029	1.05656	0.946464	0.0689813	2.25068e-05	0.00045683	0.0692097	0.0492679		-0.40201	0.333029	1.04985	0.952516	0.0689813	1.93477e-05	0.00045683	0.0692097	0.0423526		0.0102108	0.333029	1.05656	0.946465	0.0689815	2.25037e-05	0.000456834	0.0692099	0.0492606		-0.0790315	0	1.05341	0.949299
						-0.260159	0.332572	1.05548	0.947435	0.0701347	2.02855e-05	0.000470973	0.0703702	0.0430719		0	0.332572	1.05654	0.946486	0.0694381	2.25068e-05	0.00045683	0.0696665	0.0492679		-0.40201	0.332572	1.04983	0.952535	0.0694381	1.93477e-05	0.00045683	0.0696665	0.0423526		0.0102128	0.332572	1.05654	0.946487	0.0694383	2.25037e-05	0.000456834	0.0696667	0.0492606		-0.0794884	0	1.05341	0.949299
						-0.260273	0.332115	1.05546	0.947455	0.0706056	2.02962e-05	0.000471234	0.0708413	0.0430706		0	0.332115	1.05651	0.946509	0.0698949	2.25068e-05	0.00045683	0.0701233	0.0492679		-0.40201	0.332115	1.04981	0.952555	0.0698949	1.93477e-05	0.00045683	0.0701233	0.0423526		0.0102147	0.332115	1.05651	0.94651	0.0698952	2.25037e-05	0.000456834	0.0701236	0.0492606		-0.0799452	0	1.05341	0.9493
						-0.260389	0.331658	1.05544	0.947475	0.0710769	1.84235e-05	0.000471504	0.0713126	0.0390743		0	0.331658	1.05649	0.946531	0.0703518	2.01961e-05	0.00045683	0.0705802	0.0442096		-0.40201	0.331658	1.04979	0.952574	0.0703518	1.78213e-05	0.00045683	0.0705802	0.0390112		0.0102167	0.331658	1.05649	0.946532	0.070352	2.01915e-05	0.000456834	0.0705804	0.0441993		-0.080402	0	1.05341	0.9493
						-0.260506	0.331201	1.05542	0.947494	0.0715484	1.83696e-05	0.000471747	0.0717843	0.03894		0	0.331201	1.05647	0.946552	0.0708086	2.01961e-05	0.00045683	0.071037	0.0442096		-0.40201	0.331201	1.04977	0.952592	0.0708086	1.78213e-05	0.00045683	0.071037	0.0390112		0.0102187	0.331201	1.05647	0.946553	0.0708088	2.01931e-05	0.000456834	0.0710373	0.0442027		-0.0808588	0	1.05341	0.949301
						-0.260623	0.330745	1.0554	0.947512	0.0720201	1.82842e-05	0.000471997	0.0722561	0.0387384		0	0.330745	1.05644	0.946572	0.0712654	2.01961e-05	0.00045683	0.0714938	0.0442096		-0.40201	0.330745	1.04975	0.95261	0.0712654	1.78213e-05	0.00045683	0.0714938	0.0390112		0.0102208	0.330745	1.05644	0.946573	0.0712657	2.01931e-05	0.000456834	0.0714941	0.0442027		-0.0813157	0	1.05341	0.949301
						-0.260742	0.330288	1.05538	0.94753	0.0724921	1.82941e-05	0.000472254	0.0727283	0.0387383		0	0.330288	1.05642	0.946592	0.0717222	2.01961e-05	0.00045683	0.0719507	0.0442096		-0.40201	0.330288	1.04973	0.952627	0.0717222	1.78213e-05	0.00045683	0.0719507	0.0390112		0.0102228	0.330288	1.05642	0.946593	0.0717225	2.01931e-05	0.000456834	0.0719509	0.0442027		-0.0817725	0	1.05341	0.949301
						-0.260862	0.329831	1.05535	0.947549	0.0729644	1.83042e-05	0.000472518	0.0732006	0.0387379		0	0.329831	1.0564	0.946612	0.0721791	2.01961e-05	0.00045683	0.0724075	0.0442096		-0.40201	0.329831	1.04971	0.952645	0.0721791	1.78213e-05	0.00045683	0.0724075	0.0390112		0.0102248	0.329831	1.0564	0.946613	0.0721793	2.01931e-05	0.000456834	0.0724078	0.0442027		-0.0822293	0	1.05341	0.949302
						-0.260982	0.329374	1.05533	0.947567	0.0734369	1.83145e-05	0.000472791	0.0736733	0.0387373		0	0.329374	1.05638	0.946632	0.0726359	2.01961e-05	0.00045683	0.0728643	0.0442096		-0.40201	0.329374	1.04969	0.952663	0.0726359	1.78213e-05	0.00045683	0.0728643	0.0390112		0.0102269	0.329374	1.05638	0.946633	0.0726362	2.01931e-05	0.000456834	0.0728646	0.0442027		-0.0826862	0	1.05341	0.949302
						-0.261104	0.328917	1.05531	0.947585	0.0739097	1.8325e-05	0.000473071	0.0741462	0.0387366		0	0.328917	1.05635	0.946653	0.0730927	2.01961e-05	0.00045683	0.0733212	0.0442096		-0.40201	0.328917	1.04967	0.952681	0.0730927	1.78213e-05	0.00045683	0.0733212	0.0390112		0.010229	0.328917	1.05635	0.946654	0.073093	2.01931e-05	0.000456834	0.0733214	0.0442027		-0.083143	0	1.0534	0.949303
						-0.261227	0.32846	1.05529	0.947604	0.0743828	1.83736e-05	0.00047336	0.0746194	0.0388156		0	0.32846	1.05633	0.946673	0.0735496	2.01961e-05	0.00045683	0.073778	0.0442096		-0.40201	0.32846	1.04965	0.952699	0.0735496	1.78213e-05	0.00045683	0.073778	0.0390112		0.010231	0.32846	1.05633	0.946674	0.0735498	2.01931e-05	0.000456834	0.0737783	0.0442027		-0.0835998	0	1.0534	0.949303
						-0.261351	0.328004	1.05527	0.947622	0.0748561	1.8453e-05	0.000473658	0.0750929	0.0389588		0	0.328004	1.05631	0.946693	0.0740064	2.01961e-05	0.00045683	0.0742348	0.0442096		-0.40201	0.328004	1.04963	0.952717	0.0740064	1.78213e-05	0.00045683	0.0742348	0.0390112		0.0102331	0.328004	1.05631	0.946694	0.0740067	2.01931e-05	0.000456834	0.0742351	0.0442027		-0.0840566	0	1.0534	0.949303
						-0.261476	0.327547	1.05525	0.94764	0.0753298	1.84653e-05	0.000473967	0.0755668	0.0389593		0	0.327547	1.05629	0.946713	0.0744632	2.01961e-05	0.00045683	0.0746916	0.0442096		-0.40201	0.327547	1.04961	0.952734	0.0744632	1.78213e-05	0.00045683	0.0746916	0.0390112		0.0102352	0.327547	1.05628	0.946714	0.0744635	2.01931e-05	0.000456835	0.0746919	0.0442027		-0.0845135	0	1.0534	0.949304
						-0.261603	0.32709	1.05523	0.947659	0.0758037	1.83606e-05	0.000474286	0.0760409	0.0387125		0	0.32709	1.05626	0.946733	0.0749201	2.01961e-05	0.00045683	0.0751485	0.0442096		-0.40201	0.32709	1.04959	0.952752	0.0749201	1.65842e-05	0.00045683	0.0751485	0.0363031		0.0102374	0.32709	1.05626	0.946734	0.0749203	2.01931e-05	0.000456835	0.0751488	0.0442027		-0.0849703	0	1.0534	0.949304
						-0.26173	0.326633	1.05521	0.947677	0.076278	1.67272e-05	0.000474615	0.0765153	0.0352441		0	0.326633	1.05624	0.946754	0.0753769	1.81941e-05	0.00045683	0.0756053	0.0398272		-0.40201	0.326633	1.04957	0.952769	0.0753769	1.65842e-05	0.00045683	0.0756053	0.0363031		0.0102395	0.326633	1.05624	0.946755	0.0753772	1.81897e-05	0.000456835	0.0756056	0.0398171		-0.0854271	0	1.0534	0.949304
						-0.261859	0.326176	1.05519	0.947694	0.0767526	1.67385e-05	0.000474915	0.0769901	0.0352457		0	0.326176	1.05622	0.946772	0.0758337	1.81941e-05	0.00045683	0.0760621	0.0398272		-0.40201	0.326176	1.04955	0.952785	0.0758337	1.65842e-05	0.00045683	0.0760621	0.0363031		0.0102417	0.326176	1.05622	0.946773	0.075834	1.81913e-05	0.000456835	0.0760624	0.0398208		-0.085884	0	1.0534	0.949305
						-0.261989	0.32572	1.05517	0.947711	0.0772276	1.67501e-05	0.000475223	0.0774652	0.0352471		0	0.32572	1.0562	0.94679	0.0762905	1.81941e-05	0.00045683	0.076519	0.0398272		-0.40201	0.32572	1.04954	0.952802	0.0762905	1.65842e-05	0.00045683	0.076519	0.0363031		0.0102438	0.32572	1.0562	0.946791	0.0762908	1.81913e-05	0.000456835	0.0765193	0.0398208		-0.0863408	0	1.0534	0.949305
						-0.26212	0.325263	1.05516	0.947727	0.0777028	1.67618e-05	0.00047554	0.0779406	0.0352483		0	0.325263	1.05618	0.946808	0.0767474	1.81941e-05	0.00045683	0.0769758	0.0398272		-0.40201	0.325263	1.04952	0.952819	0.0767474	1.65842e-05	0.00045683	0.0769758	0.0363031		0.010246	0.325263	1.05618	0.946809	0.0767477	1.81914e-05	0.000456835	0.0769761	0.0398208		-0.0867976	0	1.0534	0.949306
						-0.262252	0.324806	1.05514	0.947744	0.0781783	1.67739e-05	0.000475867	0.0784163	0.0352494		0	0.324806	1.05616	0.946826	0.0772042	1.81941e-05	0.00045683	0.0774326	0.0398272		-0.40201	0.324806	1.0495	0.952835	0.0772042	1.65842e-05	0.00045683	0.0774326	0.0363031		0.0102482	0.324806	1.05616	0.946827	0.0772045	1.81914e-05	0.000456835	0.0774329	0.0398208		-0.0872545	0	1.0534	0.949306
						-0.262385	0.324349	1.05512	0.947761	0.0786542	1.67861e-05	0.000476202	0.0788923	0.0352503		0	0.324349	1.05614	0.946845	0.077661	1.81941e-05	0.00045683	0.0778894	0.0398272		-0.40201	0.324349	1.04948	0.952852	0.077661	1.65842e-05	0.00045683	0.0778894	0.0363031		0.0102504	0.324349	1.05614	0.946846	0.0776614	1.81914e-05	0.000456835	0.0778898	0.0398208		-0.0877113	0	1.0534	0.949307
						-0.262519	0.323892	1.0551	0.947778	0.0791304	1.67986e-05	0.000476548	0.0793687	0.035251		0	0.323892	1.05612	0.946863	0.0781179	1.81941e-05	0.00045683	0.0783463	0.0398272		-0.40201	0.323892	1.04946	0.952868	0.0781179	1.65842e-05	0.00045683	0.0783463	0.0363031		0.0102526	0.323892	1.05612	0.946864	0.0781182	1.81914e-05	0.000456835	0.0783466	0.0398208		-0.0881681	0	1.0534	0.949307
						-0.262655	0.323435	1.05508	0.947795	0.0796069	1.67842e-05	0.000476903	0.0798454	0.0351944		0	0.323435	1.0561	0.946881	0.0785747	1.81941e-05	0.00045683	0.0788031	0.0398272		-0.40201	0.323435	1.04944	0.952885	0.0785747	1.65842e-05	0.00045683	0.0788031	0.0363031		0.0102549	0.323435	1.0561	0.946882	0.078575	1.81914e-05	0.000456835	0.0788034	0.0398208		-0.0886249	0	1.0534	0.949307
						-0.262792	0.322979	1.05506	0.947811	0.0800838	1.66835e-05	0.00047727	0.0803225	0.0349565		0	0.322979	1.05608	0.946899	0.0790315	1.81941e-05	0.00045683	0.0792599	0.0398272		-0.40201	0.322979	1.04943	0.952901	0.0790315	1.65842e-05	0.00045683	0.0792599	0.0363031		0.0102571	0.322979	1.05608	0.9469	0.0790319	1.81914e-05	0.000456835	0.0792603	0.0398208		-0.0890818	0	1.0534	0.949308
						-0.26293	0.322522	1.05504	0.947828	0.0805611	1.66965e-05	0.000477647	0.0807999	0.0349561		0	0.322522	1.05606	0.946917	0.0794884	1.81941e-05	0.00045683	0.0797168	0.0398272		-0.40201	0.322522	1.04941	0.952918	0.0794884	1.65842e-05	0.00045683	0.0797168	0.0363031		0.0102594	0.322522	1.05606	0.946918	0.0794887	1.81914e-05	0.000456835	0.0797171	0.0398208		-0.0895386	0	1.0534	0.949308
						-0.26307	0.322065	1.05503	0.947845	0.0810388	1.67098e-05	0.000478035	0.0812778	0.0349555		0	0.322065	1.05604	0.946936	0.0799452	1.81941e-05	0.00045683	0.0801736	0.0398272		-0.40201	0.322065	1.04939	0.952935	0.0799452	1.65842e-05	0.00045683	0.0801736	0.0363031		0.0102616	0.322065	1.05604	0.946937	0.0799455	1.81914e-05	0.000456835	0.0801739	0.0398208		-0.0899954	0	1.0534	0.949309
						-0.26321	0.321608	1.05501	0.947861	0.0815168	1.5337e-05	0.000478436	0.081756	0.0320568		0	0.321608	1.05602	0.946954	0.080402	1.64484e-05	0.00045683	0.0806304	0.036006		-0.40201	0.321608	1.04937	0.952951	0.080402	1.52701e-05	0.00045683	0.0806304	0.0334266		0.0102639	0.321608	1.05602	0.946955	0.0804024	1.64441e-05	0.000456835	0.0806308	0.0359959		-0.0904523	0	1.0534	0.949309
						-0.263352	0.321151	1.05499	0.947877	0.0819952	1.53494e-05	0.000478805	0.0822346	0.032058		0	0.321151	1.056	0.94697	0.0808588	1.64484e-05	0.00045683	0.0810873	0.036006		-0.40201	0.321151	1.04935	0.952967	0.0808588	1.52701e-05	0.00045683	0.0810873	0.0334266		0.0102662	0.321151	1.056	0.946971	0.0808592	1.64459e-05	0.000456835	0.0810876	0.0359999		-0.0909091	0	1.0534	0.94931
						-0.263496	0.320694	1.05497	0.947892	0.082474	1.5362e-05	0.000479184	0.0827136	0.032059		0	0.320694	1.05598	0.946987	0.0813157	1.64484e-05	0.00045683	0.0815441	0.036006		-0.40201	0.320694	1.04934	0.952982	0.0813157	1.52701e-05	0.00045683	0.0815441	0.0334266		0.0102685	0.320694	1.05598	0.946988	0.081316	1.64459e-05	0.000456836	0.0815444	0.0359999		-0.0913659	0	1.0534	0.94931
						-0.263641	0.320238	1.05496	0.947908	0.0829532	1.53749e-05	0.000479574	0.083193	0.0320598		0	0.320238	1.05596	0.947003	0.0817725	1.64484e-05	0.00045683	0.0820009	0.036006		-0.40201	0.320238	1.04932	0.952997	0.0817725	1.52701e-05	0.00045683	0.0820009	0.0334266		0.0102709	0.320238	1.05596	0.947004	0.0817729	1.64459e-05	0.000456836	0.0820013	0.0359999		-0.0918228	0	1.0534	0.94931
						-0.263786	0.319781	1.05494	0.947923	0.0834328	1.53881e-05	0.000479975	0.0836728	0.0320605		0	0.319781	1.05594	0.94702	0.0822293	1.64484e-05	0.00045683	0.0824577	0.036006		-0.40201	0.319781	1.0493	0.953012	0.0822293	1.52701e-05	0.00045683	0.0824577	0.0334266		0.0102732	0.319781	1.05594	0.94702	0.0822297	1.64459e-05	0.000456836	0.0824581	0.0359999		-0.0922796	0	1.0534	0.949311
						-0.263934	0.319324	1.05492	0.947938	0.0839128	1.53026e-05	0.000480388	0.084153	0.0318551		0	0.319324	1.05593	0.947036	0.0826862	1.64484e-05	0.00045683	0.0829146	0.036006		-0.40201	0.319324	1.04929	0.953028	0.0826862	1.52701e-05	0.00045683	0.0829146	0.0334266		0.0102756	0.319324	1.05593	0.947037	0.0826865	1.64459e-05	0.000456836	0.082915	0.0359999		-0.0927364	0	1.0534	0.949311
						-0.264082	0.318867	1.0549	0.947954	0.0843932	1.52932e-05	0.000480812	0.0846336	0.0318073		0	0.318867	1.05591	0.947052	0.083143	1.64484e-05	0.00045683	0.0833714	0.036006		-0.40201	0.318867	1.04927	0.953043	0.083143	1.52701e-05	0.00045683	0.0833714	0.0334266		0.0102779	0.318867	1.05591	0.947053	0.0831434	1.64459e-05	0.000456836	0.0833718	0.0359999		-0.0931932	0	1.05339	0.949312
						-0.264232	0.31841	1.05489	0.947969	0.084874	1.53069e-05	0.000481248	0.0851146	0.0318069		0	0.31841	1.05589	0.947069	0.0835998	1.64484e-05	0.00045683	0.0838282	0.036006		-0.40201	0.31841	1.04925	0.953058	0.0835998	1.52701e-05	0.00045683	0.0838282	0.0334266		0.0102803	0.31841	1.05589	0.94707	0.0836002	1.64459e-05	0.000456836	0.0838286	0.0359999		-0.0936501	0	1.05339	0.949312
						-0.264384	0.317953	1.05487	0.947984	0.0853552	1.53208e-05	0.000481697	0.0855961	0.0318062		0	0.317953	1.05587	0.947085	0.0840566	1.64484e-05	0.00045683	0.0842851	0.036006		-0.40201	0.317953	1.04924	0.953073	0.0840566	1.52701e-05	0.00045683	0.0842851	0.0334266		0.0102827	0.317953	1.05587	0.947086	0.084057	1.64459e-05	0.000456836	0.0842855	0.0359999		-0.0941069	0	1.05339	0.949313
						-0.264536	0.317497	1.05485	0.948	0.0858369	1.53351e-05	0.000482159	0.086078	0.0318053		0	0.317497	1.05585	0.947102	0.0845135	1.64484e-05	0.00045683	0.0847419	0.036006		-0.40201	0.317497	1.04922	0.953089	0.0845135	1.52701e-05	0.00045683	0.0847419	0.0334266		0.0102851	0.317497	1.05585	0.947103	0.0845139	1.64459e-05	0.000456836	0.0847423	0.0359999		-0.0945637	0	1.05339	0.949313
						-0.264691	0.31704	1.05484	0.948015	0.0863191	1.53496e-05	0.000482635	0.0865604	0.0318041		0	0.31704	1.05583	0.947118	0.0849703	1.64484e-05	0.00045683	0.0851987	0.036006		-0.40201	0.31704	1.0492	0.953104	0.0849703	1.42834e-05	0.00045683	0.0851987	0.0312665		0.0102876	0.31704	1.05583	0.947119	0.0849707	1.64459e-05	0.000456836	0.0851991	0.0359999		-0.0950206	0	1.05339	0.949314
						-0.264846	0.316583	1.05482	0.94803	0.0868017	1.41563e-05	0.000483125	0.0870433	0.0293019		0	0.316583	1.05582	0.947135	0.0854271	1.49175e-05	0.00045683	0.0856556	0.0326547		-0.40201	0.316583	1.04919	0.953118	0.0854271	1.42834e-05	0.00045683	0.0856556	0.0312665		0.01029	0.316583	1.05582	0.947136	0.0854276	1.49132e-05	0.000456836	0.085656	0.0326448		-0.0954774	0	1.05339	0.949314
						-0.265004	0.316126	1.0548	0.948044	0.0872848	1.417e-05	0.000483581	0.0875266	0.0293026		0	0.316126	1.0558	0.94715	0.085884	1.49175e-05	0.00045683	0.0861124	0.0326547		-0.40201	0.316126	1.04917	0.953133	0.085884	1.42834e-05	0.00045683	0.0861124	0.0312665		0.0102925	0.316126	1.0558	0.947151	0.0858844	1.49151e-05	0.000456836	0.0861128	0.032649		-0.0959342	0	1.05339	0.949315
						-0.265162	0.315669	1.05479	0.948059	0.0877684	1.4123e-05	0.000484049	0.0880104	0.029177		0	0.315669	1.05578	0.947164	0.0863408	1.49175e-05	0.00045683	0.0865692	0.0326547		-0.40201	0.315669	1.04916	0.953147	0.0863408	1.42834e-05	0.00045683	0.0865692	0.0312665		0.0102949	0.315669	1.05578	0.947165	0.0863412	1.49151e-05	0.000456836	0.0865696	0.032649		-0.096391	0	1.05339	0.949315
						-0.265322	0.315212	1.05477	0.948073	0.0882525	1.40937e-05	0.00048453	0.0884947	0.0290876		0	0.315212	1.05577	0.947179	0.0867976	1.49175e-05	0.00045683	0.087026	0.0326547		-0.40201	0.315212	1.04914	0.953161	0.0867976	1.42834e-05	0.00045683	0.087026	0.0312665		0.0102974	0.315212	1.05577	0.94718	0.0867981	1.49151e-05	0.000456836	0.0870265	0.032649		-0.0968479	0	1.05339	0.949316
						-0.265484	0.314756	1.05476	0.948087	0.088737	1.41079e-05	0.000485024	0.0889795	0.0290873		0	0.314756	1.05575	0.947194	0.0872545	1.49175e-05	0.00045683	0.0874829	0.0326547		-0.40201	0.314756	1.04912	0.953175	0.0872545	1.42834e-05	0.00045683	0.0874829	0.0312665		0.0102999	0.314756	1.05575	0.947195	0.0872549	1.49151e-05	0.000456837	0.0874833	0.032649		-0.0973047	0	1.05339	0.949316
						-0.265647	0.314299	1.05474	0.948101	0.089222	1.41225e-05	0.000485532	0.0894648	0.0290869		0	0.314299	1.05573	0.947209	0.0877113	1.49175e-05	0.00045683	0.0879397	0.0326547		-0.40201	0.314299	1.04911	0.95319	0.0877113	1.42834e-05	0.00045683	0.0879397	0.0312665		0.0103024	0.314299	1.05573	0.94721	0.0877117	1.49151e-05	0.000456837	0.0879402	0.032649		-0.0977615	0	1.05339	0.949317
						-0.265811	0.313842	1.05472	0.948115	0.0897076	1.41373e-05	0.000486055	0.0899506	0.0290861		0	0.313842	1.05572	0.947224	0.0881681	1.49175e-05	0.00045683	0.0883965	0.0326547		-0.40201	0.313842	1.04909	0.953204	0.0881681	1.42834e-05	0.00045683	0.0883965	0.0312665		0.010305	0.313842	1.05572	0.947225	0.0881686	1.49151e-05	0.000456837	0.088397	0.032649		-0.0982184	0	1.05339	0.949317
						-0.265977	0.313385	1.05471	0.948129	0.0901936	1.41525e-05	0.000486592	0.0904369	0.0290851		0	0.313385	1.0557	0.947239	0.0886249	1.49175e-05	0.00045683	0.0888534	0.0326547		-0.40201	0.313385	1.04908	0.953218	0.0886249	1.42834e-05	0.00045683	0.0888534	0.0312665		0.0103075	0.313385	1.0557	0.94724	0.0886254	1.49151e-05	0.000456837	0.0888538	0.032649		-0.0986752	0	1.05339	0.949318
						-0.266145	0.312928	1.05469	0.948143	0.0906802	1.41679e-05	0.000487144	0.0909238	0.0290838		0	0.312928	1.05568	0.947254	0.0890818	1.49175e-05	0.00045683	0.0893102	0.0326547		-0.40201	0.312928	1.04906	0.953232	0.0890818	1.42834e-05	0.00045683	0.0893102	0.0312665		0.0103101	0.312928	1.05568	0.947255	0.0890822	1.49151e-05	0.000456837	0.0893107	0.032649		-0.099132	0	1.05339	0.949318
						-0.266314	0.312471	1.05468	0.948157	0.0911673	1.42972e-05	0.000487713	0.0914112	0.0293151		0	0.312471	1.05567	0.947269	0.0895386	1.49175e-05	0.00045683	0.089767	0.0326547		-0.40201	0.312471	1.04905	0.953247	0.0895386	1.42834e-05	0.00045683	0.089767	0.0312665		0.0103126	0.312471	1.05567	0.94727	0.0895391	1.49151e-05	0.000456837	0.0897675	0.032649		-0.0995889	0	1.05339	0.949319
						-0.266485	0.312015	1.05466	0.948172	0.0916551	1.4275e-05	0.000488305	0.0918992	0.0292341		0	0.312015	1.05565	0.947284	0.0899954	1.49175e-05	0.00045683	0.0902238	0.0326547		-0.40201	0.312015	1.04903	0.953261	0.0899954	1.42834e-05	0.00045683	0.0902238	0.0312665		0.0103152	0.312015	1.05565	0.947285	0.0899959	1.49151e-05	0.000456837	0.0902243	0.032649		-0.100046	0	1.05339	0.949319
						-0.266657	0.311558	1.05465	0.948186	0.0921434	1.31941e-05	0.000488916	0.0923878	0.0269868		0	0.311558	1.05563	0.947299	0.0904523	1.35679e-05	0.00045683	0.0906807	0.0297004		-0.40201	0.311558	1.04901	0.953275	0.0904523	1.32241e-05	0.00045683	0.0906807	0.0289477		0.0103178	0.311558	1.05563	0.9473	0.0904528	1.35637e-05	0.000456837	0.0906812	0.0296906		-0.100503	0	1.05339	0.94932
						-0.266831	0.311101	1.05463	0.948199	0.0926323	1.32105e-05	0.000489489	0.092877	0.0269887		0	0.311101	1.05562	0.947312	0.0909091	1.35679e-05	0.00045683	0.0911375	0.0297004		-0.40201	0.311101	1.049	0.953289	0.0909091	1.32241e-05	0.00045683	0.0911375	0.0289477		0.0103204	0.311101	1.05562	0.947313	0.0909096	1.35657e-05	0.000456837	0.091138	0.0296951		-0.100959	0	1.05339	0.94932
						-0.267007	0.310644	1.05462	0.948212	0.0931218	1.32273e-05	0.000490078	0.0933668	0.0269904		0	0.310644	1.0556	0.947326	0.0913659	1.35679e-05	0.00045683	0.0915943	0.0297004		-0.40201	0.310644	1.04899	0.953302	0.0913659	1.32241e-05	0.00045683	0.0915943	0.0289477		0.0103231	0.310644	1.0556	0.947327	0.0913664	1.35657e-05	0.000456837	0.0915949	0.0296951		-0.101416	0	1.05338	0.949321
						-0.267184	0.310187	1.0546	0.948226	0.0936118	1.32443e-05	0.000490683	0.0938572	0.0269918		0	0.310187	1.05559	0.947339	0.0918228	1.35679e-05	0.00045683	0.0920512	0.0297004		-0.40201	0.310187	1.04897	0.953315	0.0918228	1.32241e-05	0.00045683	0.0920512	0.0289477		0.0103257	0.310187	1.05559	0.94734	0.0918233	1.35657e-05	0.000456837	0.0920517	0.0296951		-0.101873	0	1.05338	0.949321
						-0.267364	0.30973	1.05459	0.948239	0.0941025	1.32617e-05	0.000491305	0.0943482	0.026993		0	0.30973	1.05557	0.947353	0.0922796	1.35679e-05	0.00045683	0.092508	0.0297004		-0.40201	0.30973	1.04896	0.953328	0.0922796	1.32241e-05	0.00045683	0.092508	0.0289477		0.0103284	0.30973	1.05557	0.947354	0.0922801	1.35657e-05	0.000456837	0.0925085	0.0296951		-0.10233	0	1.05338	0.949322
						-0.267544	0.309274	1.05457	0.948252	0.0945938	1.32794e-05	0.000491944	0.0948398	0.0269939		0	0.309274	1.05556	0.947367	0.0927364	1.35679e-05	0.00045683	0.0929648	0.0297004		-0.40201	0.309274	1.04894	0.953341	0.0927364	1.32241e-05	0.00045683	0.0929648	0.0289477		0.0103311	0.309274	1.05556	0.947368	0.0927369	1.35657e-05	0.000456838	0.0929654	0.0296951		-0.102787	0	1.05338	0.949322
						-0.267727	0.308817	1.05456	0.948265	0.0950858	1.32974e-05	0.000492601	0.0953321	0.0269946		0	0.308817	1.05554	0.94738	0.0931932	1.35679e-05	0.00045683	0.0934217	0.0297004		-0.40201	0.308817	1.04893	0.953355	0.0931932	1.32241e-05	0.00045683	0.0934217	0.0289477		0.0103337	0.308817	1.05554	0.947381	0.0931938	1.35657e-05	0.000456838	0.0934222	0.0296951		-0.103243	0	1.05338	0.949323
						-0.267911	0.30836	1.05454	0.948279	0.0955784	1.32632e-05	0.000493276	0.095825	0.0268883		0	0.30836	1.05553	0.947394	0.0936501	1.35679e-05	0.00045683	0.0938785	0.0297004		-0.40201	0.30836	1.04891	0.953368	0.0936501	1.32241e-05	0.00045683	0.0938785	0.0289477		0.0103365	0.30836	1.05553	0.947395	0.0936506	1.35657e-05	0.000456838	0.093879	0.0296951		-0.1037	0	1.05338	0.949323
						-0.268097	0.307903	1.05453	0.948292	0.0960717	1.32488e-05	0.00049397	0.0963186	0.0268213		0	0.307903	1.05551	0.947407	0.0941069	1.35679e-05	0.00045683	0.0943353	0.0297004		-0.40201	0.307903	1.0489	0.953381	0.0941069	1.32241e-05	0.00045683	0.0943353	0.0289477		0.0103392	0.307903	1.05551	0.947408	0.0941075	1.35657e-05	0.000456838	0.0943359	0.0296951		-0.104157	0	1.05338	0.949324
						-0.268285	0.307446	1.05451	0.948305	0.0965656	1.32677e-05	0.000494685	0.096813	0.0268207		0	0.307446	1.0555	0.947421	0.0945637	1.35679e-05	0.00045683	0.0947921	0.0297004		-0.40201	0.307446	1.04888	0.953394	0.0945637	1.32241e-05	0.00045683	0.0947921	0.0289477		0.0103419	0.307446	1.0555	0.947422	0.0945643	1.35657e-05	0.000456838	0.0947927	0.0296951		-0.104614	0	1.05338	0.949324
						-0.268475	0.306989	1.0545	0.948319	0.0970603	1.3287e-05	0.000495419	0.097308	0.0268199		0	0.306989	1.05548	0.947434	0.0950206	1.35679e-05	0.00045683	0.095249	0.0297004		-0.40201	0.306989	1.04887	0.953408	0.0950206	1.24196e-05	0.00045683	0.095249	0.0271868		0.0103447	0.306989	1.05548	0.947435	0.0950211	1.35657e-05	0.000456838	0.0952496	0.0296951		-0.105071	0	1.05338	0.949325
						-0.268667	0.306533	1.05448	0.948332	0.0975557	1.2381e-05	0.000496175	0.0978038	0.0249531		0	0.306533	1.05547	0.947448	0.0954774	1.23727e-05	0.00045683	0.0957058	0.027084		-0.40201	0.306533	1.04886	0.95342	0.0954774	1.24196e-05	0.00045683	0.0957058	0.0271868		0.0103474	0.306533	1.05547	0.947449	0.095478	1.23685e-05	0.000456838	0.0957064	0.0270743		-0.105528	0	1.05338	0.949325
						-0.26886	0.306076	1.05447	0.948344	0.0980519	1.23993e-05	0.000496886	0.0983003	0.0249543		0	0.306076	1.05545	0.94746	0.0959342	1.23727e-05	0.00045683	0.0961626	0.027084		-0.40201	0.306076	1.04884	0.953432	0.0959342	1.24196e-05	0.00045683	0.0961626	0.0271868		0.0103502	0.306076	1.05545	0.947461	0.0959348	1.23706e-05	0.000456838	0.0961632	0.027079		-0.105984	0	1.05338	0.949326
						-0.269056	0.305619	1.05446	0.948357	0.0985488	1.2418e-05	0.000497615	0.0987976	0.0249552		0	0.305619	1.05544	0.947473	0.096391	1.23727e-05	0.00045683	0.0966195	0.027084		-0.40201	0.305619	1.04883	0.953445	0.096391	1.24196e-05	0.00045683	0.0966195	0.0271868		0.010353	0.305619	1.05544	0.947474	0.0963916	1.23706e-05	0.000456838	0.0966201	0.027079		-0.106441	0	1.05338	0.949327
						-0.269253	0.305162	1.05444	0.948369	0.0990464	1.2437e-05	0.000498366	0.0992956	0.0249559		0	0.305162	1.05543	0.947485	0.0968479	1.23727e-05	0.00045683	0.0970763	0.027084		-0.40201	0.305162	1.04881	0.953457	0.0968479	1.24196e-05	0.00045683	0.0970763	0.0271868		0.0103558	0.305162	1.05542	0.947486	0.0968485	1.23706e-05	0.000456838	0.0970769	0.027079		-0.106898	0	1.05338	0.949327
						-0.269452	0.304705	1.05443	0.948381	0.0995448	1.23946e-05	0.000499137	0.0997943	0.0248322		0	0.304705	1.05541	0.947497	0.0973047	1.23727e-05	0.00045683	0.0975331	0.027084		-0.40201	0.304705	1.0488	0.95347	0.0973047	1.24196e-05	0.00045683	0.0975331	0.0271868		0.0103586	0.304705	1.05541	0.947498	0.0973053	1.23706e-05	0.000456838	0.0975337	0.027079		-0.107355	0	1.05338	0.949328
						-0.269653	0.304249	1.05441	0.948394	0.100044	1.24059e-05	0.00049993	0.100294	0.0248156		0	0.304249	1.0554	0.94751	0.0977615	1.23727e-05	0.00045683	0.0979899	0.027084		-0.40201	0.304249	1.04879	0.953482	0.0977615	1.24196e-05	0.00045683	0.0979899	0.0271868		0.0103615	0.304249	1.0554	0.947511	0.0977622	1.23706e-05	0.000456839	0.0979906	0.027079		-0.107812	0	1.05338	0.949328
						-0.269856	0.303792	1.0544	0.948406	0.100544	1.24259e-05	0.000500745	0.100794	0.0248151		0	0.303792	1.05538	0.947522	0.0982184	1.23727e-05	0.00045683	0.0984468	0.027084		-0.40201	0.303792	1.04877	0.953495	0.0982184	1.24196e-05	0.00045683	0.0984468	0.0271868		0.0103643	0.303792	1.05538	0.947523	0.098219	1.23706e-05	0.000456839	0.0984474	0.027079		-0.108269	0	1.05338	0.949329
						-0.270062	0.303335	1.05439	0.948419	0.101045	1.24463e-05	0.000501584	0.101295	0.0248143		0	0.303335	1.05537	0.947535	0.0986752	1.23727e-05	0.00045683	0.0989036	0.027084		-0.40201	0.303335	1.04876	0.953507	0.0986752	1.24196e-05	0.00045683	0.0989036	0.0271868		0.0103672	0.303335	1.05537	0.947535	0.0986758	1.23706e-05	0.000456839	0.0989043	0.027079		-0.108725	0	1.05338	0.949329
						-0.270269	0.302878	1.05437	0.948431	0.101546	1.24672e-05	0.000502448	0.101797	0.0248131		0	0.302878	1.05536	0.947547	0.099132	1.23727e-05	0.00045683	0.0993604	0.027084		-0.40201	0.302878	1.04875	0.953519	0.099132	1.24196e-05	0.00045683	0.0993604	0.0271868		0.0103701	0.302878	1.05536	0.947548	0.0991327	1.23706e-05	0.000456839	0.0993611	0.027079		-0.109182	0	1.05337	0.94933
						-0.270478	0.302421	1.05436	0.948444	0.102049	1.24884e-05	0.000503336	0.1023	0.0248115		0	0.302421	1.05534	0.947559	0.0995889	1.23727e-05	0.00045683	0.0998173	0.027084		-0.40201	0.302421	1.04873	0.953532	0.0995889	1.24196e-05	0.00045683	0.0998173	0.0271868		0.010373	0.302421	1.05534	0.94756	0.0995895	1.23706e-05	0.000456839	0.0998179	0.027079		-0.109639	0	1.05337	0.949331
						-0.270689	0.301964	1.05435	0.948456	0.102552	1.25101e-05	0.000504251	0.102804	0.0248095		0	0.301964	1.05533	0.947572	0.100046	1.23727e-05	0.00045683	0.100274	0.027084		-0.40201	0.301964	1.04872	0.953544	0.100046	1.24196e-05	0.00045683	0.100274	0.0271868		0.0103759	0.301964	1.05533	0.947573	0.100046	1.23706e-05	0.000456839	0.100275	0.027079		-0.110096	0	1.05337	0.949331
						-0.270903	0.301508	1.05433	0.948469	0.103056	1.16929e-05	0.000505192	0.103309	0.0231457		0	0.301508	1.05532	0.947584	0.100503	1.13096e-05	0.00045683	0.100731	0.024757		-0.40201	0.301508	1.04871	0.953557	0.100503	1.15487e-05	0.00045683	0.100731	0.0252804		0.0103789	0.301508	1.05531	0.947585	0.100503	1.13054e-05	0.000456839	0.100732	0.0247473		-0.110553	0	1.05337	0.949332
						-0.271118	0.301051	1.05432	0.94848	0.103561	1.1676e-05	0.000506089	0.103814	0.0230713		0	0.301051	1.0553	0.947595	0.100959	1.13096e-05	0.00045683	0.101188	0.024757		-0.40201	0.301051	1.04869	0.953568	0.100959	1.15487e-05	0.00045683	0.101188	0.0252804		0.0103818	0.301051	1.0553	0.947596	0.10096	1.13077e-05	0.000456839	0.101188	0.0247523		-0.11101	0	1.05337	0.949332
						-0.271336	0.300594	1.05431	0.948492	0.104067	1.18505e-05	0.00050701	0.104321	0.0233734		0	0.300594	1.05529	0.947607	0.101416	1.13096e-05	0.00045683	0.101645	0.024757		-0.40201	0.300594	1.04868	0.95358	0.101416	1.15487e-05	0.00045683	0.101645	0.0252804		0.0103848	0.300594	1.05529	0.947608	0.101417	1.13077e-05	0.000456839	0.101645	0.0247523		-0.111466	0	1.05337	0.949333
						-0.271556	0.300137	1.05429	0.948504	0.104574	1.18903e-05	0.000507984	0.104828	0.023407		0	0.300137	1.05528	0.947618	0.101873	1.13096e-05	0.00045683	0.102101	0.024757		-0.40201	0.300137	1.04867	0.953591	0.101873	1.15487e-05	0.00045683	0.102101	0.0252804		0.0103878	0.300137	1.05528	0.947619	0.101874	1.13077e-05	0.000456839	0.102102	0.0247523		-0.111923	0	1.05337	0.949334
						-0.271778	0.29968	1.05428	0.948516	0.105082	1.19147e-05	0.000508988	0.105337	0.0234088		0	0.29968	1.05526	0.947629	0.10233	1.13096e-05	0.00045683	0.102558	0.024757		-0.40201	0.29968	1.04865	0.953603	0.10233	1.15487e-05	0.00045683	0.102558	0.0252804		0.0103908	0.29968	1.05526	0.94763	0.102331	1.13077e-05	0.00045684	0.102559	0.0247523		-0.11238	0	1.05337	0.949334
						-0.272003	0.299223	1.05427	0.948528	0.105591	1.19396e-05	0.000510019	0.105846	0.0234103		0	0.299223	1.05525	0.947641	0.102787	1.13096e-05	0.00045683	0.103015	0.024757		-0.40201	0.299223	1.04864	0.953614	0.102787	1.15487e-05	0.00045683	0.103015	0.0252804		0.0103938	0.299223	1.05525	0.947642	0.102787	1.13077e-05	0.00045684	0.103016	0.0247523		-0.112837	0	1.05337	0.949335
						-0.272229	0.298767	1.05425	0.94854	0.106101	1.1965e-05	0.000511079	0.106357	0.0234114		0	0.298767	1.05524	0.947652	0.103243	1.13096e-05	0.00045683	0.103472	0.024757		-0.40201	0.298767	1.04863	0.953626	0.103243	1.15487e-05	0.00045683	0.103472	0.0252804		0.0103968	0.298767	1.05524	0.947653	0.103244	1.13077e-05	0.00045684	0.103473	0.0247523		-0.113294	0	1.05337	0.949335
						-0.272459	0.29831	1.05424	0.948551	0.106613	1.19908e-05	0.000512168	0.106869	0.0234121		0	0.29831	1.05523	0.947663	0.1037	1.13096e-05	0.00045683	0.103929	0.024757		-0.40201	0.29831	1.04862	0.953637	0.1037	1.15487e-05	0.00045683	0.103929	0.0252804		0.0103998	0.29831	1.05523	0.947664	0.103701	1.13077e-05	0.00045684	0.103929	0.0247523		-0.113751	0	1.05337	0.949336
						-0.27269	0.297853	1.05423	0.948563	0.107125	1.19696e-05	0.000513288	0.107381	0.0233197		0	0.297853	1.05521	0.947675	0.104157	1.13096e-05	0.00045683	0.104386	0.024757		-0.40201	0.297853	1.0486	0.953649	0.104157	1.15487e-05	0.00045683	0.104386	0.0252804		0.0104029	0.297853	1.05521	0.947675	0.104158	1.13077e-05	0.00045684	0.104386	0.0247523		-0.114207	0	1.05337	0.949337
						-0.272924	0.297396	1.05421	0.948575	0.107638	1.19936e-05	0.00051444	0.107895	0.0233142		0	0.297396	1.0552	0.947686	0.104614	1.13096e-05	0.00045683	0.104842	0.024757		-0.40201	0.297396	1.04859	0.953661	0.104614	1.15487e-05	0.00045683	0.104842	0.0252804		0.010406	0.297396	1.0552	0.947687	0.104615	1.13077e-05	0.00045684	0.104843	0.0247523		-0.114664	0	1.05337	0.949337
						-0.273161	0.296939	1.0542	0.948587	0.108152	1.20208e-05	0.000515624	0.10841	0.0233134		0	0.296939	1.05519	0.947697	0.105071	1.13096e-05	0.00045683	0.105299	0.024757		-0.40201	0.296939	1.04858	0.953672	0.105071	1.15487e-05	0.00045683	0.105299	0.0252804		0.0104091	0.296939	1.05519	0.947698	0.105072	1.13077e-05	0.00045684	0.1053	0.0247523		-0.115121	0	1.05337	0.949338
						-0.2734	0.296482	1.05419	0.948599	0.108668	1.13212e-05	0.000516842	0.108927	0.0219048		0	0.296482	1.05518	0.947708	0.105528	1.03605e-05	0.00045683	0.105756	0.0226793		-0.40201	0.296482	1.04857	0.953684	0.105528	1.08207e-05	0.00045683	0.105756	0.0236867		0.0104122	0.296482	1.05518	0.947709	0.105528	1.03564e-05	0.00045684	0.105757	0.0226698		-0.115578	0	1.05336	0.949339
						-0.273642	0.296026	1.05417	0.948611	0.109185	1.13476e-05	0.00051801	0.109444	0.0219063		0	0.296026	1.05517	0.947719	0.105984	1.03605e-05	0.00045683	0.106213	0.0226793		-0.40201	0.296026	1.04855	0.953694	0.105984	1.08207e-05	0.00045683	0.106213	0.0236867		0.0104153	0.296026	1.05516	0.94772	0.105985	1.03587e-05	0.00045684	0.106214	0.0226749		-0.116035	0	1.05336	0.949339
						-0.273886	0.295569	1.05416	0.948622	0.109703	1.13745e-05	0.00051921	0.109963	0.0219075		0	0.295569	1.05515	0.947729	0.106441	1.03605e-05	0.00045683	0.10667	0.0226793		-0.40201	0.295569	1.04854	0.953705	0.106441	1.08207e-05	0.00045683	0.10667	0.0236867		0.0104185	0.295569	1.05515	0.94773	0.106442	1.03587e-05	0.000456841	0.106671	0.0226749		-0.116492	0	1.05336	0.94934
						-0.274132	0.295112	1.05415	0.948634	0.110222	1.14019e-05	0.000520442	0.110482	0.0219083		0	0.295112	1.05514	0.94774	0.106898	1.03605e-05	0.00045683	0.107127	0.0226793		-0.40201	0.295112	1.04853	0.953716	0.106898	1.08207e-05	0.00045683	0.107127	0.0236867		0.0104216	0.295112	1.05514	0.94774	0.106899	1.03587e-05	0.000456841	0.107127	0.0226749		-0.116948	0	1.05336	0.949341
						-0.274382	0.294655	1.05414	0.948645	0.110743	1.14023e-05	0.000521707	0.111003	0.021856		0	0.294655	1.05513	0.94775	0.107355	1.03605e-05	0.00045683	0.107583	0.0226793		-0.40201	0.294655	1.04852	0.953727	0.107355	1.08207e-05	0.00045683	0.107583	0.0236867		0.0104248	0.294655	1.05513	0.947751	0.107356	1.03587e-05	0.000456841	0.107584	0.0226749		-0.117405	0	1.05336	0.949341
						-0.274634	0.294198	1.05412	0.948656	0.111264	1.14218e-05	0.000523006	0.111526	0.0218389		0	0.294198	1.05512	0.94776	0.107812	1.03605e-05	0.00045683	0.10804	0.0226793		-0.40201	0.294198	1.04851	0.953738	0.107812	1.08207e-05	0.00045683	0.10804	0.0236867		0.010428	0.294198	1.05512	0.947761	0.107813	1.03587e-05	0.000456841	0.108041	0.0226749		-0.117862	0	1.05336	0.949342
						-0.274888	0.293741	1.05411	0.948668	0.111787	1.14506e-05	0.00052434	0.112049	0.0218383		0	0.293741	1.05511	0.947771	0.108269	1.03605e-05	0.00045683	0.108497	0.0226793		-0.40201	0.293741	1.04849	0.953749	0.108269	1.08207e-05	0.00045683	0.108497	0.0236867		0.0104312	0.293741	1.05511	0.947772	0.108269	1.03587e-05	0.000456841	0.108498	0.0226749		-0.118319	0	1.05336	0.949343
						-0.275146	0.293285	1.0541	0.948679	0.112312	1.148e-05	0.000525711	0.112574	0.0218373		0	0.293285	1.0551	0.947781	0.108725	1.03605e-05	0.00045683	0.108954	0.0226793		-0.40201	0.293285	1.04848	0.953759	0.108725	1.08207e-05	0.00045683	0.108954	0.0236867		0.0104344	0.293285	1.0551	0.947782	0.108726	1.03587e-05	0.000456841	0.108955	0.0226749		-0.118776	0	1.05336	0.949343
						-0.275406	0.292828	1.05408	0.948691	0.112837	1.15099e-05	0.000527119	0.113101	0.0218357		0	0.292828	1.05508	0.947791	0.109182	1.03605e-05	0.00045683	0.109411	0.0226793		-0.40201	0.292828	1.04847	0.95377	0.109182	1.08207e-05	0.00045683	0.109411	0.0236867		0.0104376	0.292828	1.05508	0.947792	0.109183	1.03587e-05	0.000456841	0.109412	0.0226749		-0.119233	0	1.05336	0.949344
						-0.275669	0.292371	1.05407	0.948702	0.113364	1.15404e-05	0.000528566	0.113629	0.0218336		0	0.292371	1.05507	0.947802	0.109639	1.03605e-05	0.00045683	0.109868	0.0226793		-0.40201	0.292371	1.04846	0.953781	0.109639	1.08207e-05	0.00045683	0.109868	0.0236867		0.0104409	0.292371	1.05507	0.947803	0.10964	1.03587e-05	0.000456841	0.109868	0.0226749		-0.119689	0	1.05336	0.949345
						-0.275935	0.291914	1.05406	0.948714	0.113893	1.15715e-05	0.000530053	0.114158	0.0218311		0	0.291914	1.05506	0.947812	0.110096	1.03605e-05	0.00045683	0.110324	0.0226793		-0.40201	0.291914	1.04845	0.953792	0.110096	1.08207e-05	0.00045683	0.110324	0.0236867		0.0104442	0.291914	1.05506	0.947813	0.110097	1.03588e-05	0.000456841	0.110325	0.0226749		-0.120146	0	1.05336	0.949345
						-0.276204	0.291457	1.05405	0.948725	0.114423	1.10115e-05	0.000531582	0.114689	0.0207147		0	0.291457	1.05505	0.947822	0.110553	9.5101e-06	0.00045683	0.110781	0.0208178		-0.40201	0.291457	1.04843	0.953803	0.110553	1.0154e-05	0.00045683	0.110781	0.0222274		0.0104475	0.291457	1.05505	0.947823	0.110554	9.50601e-06	0.000456842	0.110782	0.0208083		-0.120603	0	1.05336	0.949346
						-0.276475	0.291	1.05403	0.948736	0.114955	1.11887e-05	0.000533069	0.115221	0.0209894		0	0.291	1.05504	0.947832	0.11101	9.5101e-06	0.00045683	0.111238	0.0208178		-0.40201	0.291	1.04842	0.953813	0.11101	1.0154e-05	0.00045683	0.111238	0.0222274		0.0104508	0.291	1.05504	0.947833	0.111011	9.50846e-06	0.000456842	0.111239	0.0208137		-0.12106	0	1.05336	0.949347
						-0.27675	0.290544	1.05402	0.948747	0.115488	1.12228e-05	0.000534624	0.115755	0.0209922		0	0.290544	1.05503	0.947841	0.111466	9.5101e-06	0.00045683	0.111695	0.0208178		-0.40201	0.290544	1.04841	0.953823	0.111466	1.0154e-05	0.00045683	0.111695	0.0222274		0.0104541	0.290544	1.05503	0.947842	0.111467	9.50846e-06	0.000456842	0.111696	0.0208137		-0.121517	0	1.05336	0.949347
						-0.277028	0.290087	1.05401	0.948759	0.116022	1.12576e-05	0.000536219	0.11629	0.0209947		0	0.290087	1.05502	0.947851	0.111923	9.5101e-06	0.00045683	0.112152	0.0208178		-0.40201	0.290087	1.0484	0.953833	0.111923	1.0154e-05	0.00045683	0.112152	0.0222274		0.0104574	0.290087	1.05502	0.947852	0.111924	9.50847e-06	0.000456842	0.112153	0.0208137		-0.121974	0	1.05335	0.949348
						-0.277309	0.28963	1.054	0.94877	0.116559	1.12931e-05	0.000537858	0.116828	0.0209966		0	0.28963	1.05501	0.94786	0.11238	9.5101e-06	0.00045683	0.112608	0.0208178		-0.40201	0.28963	1.04839	0.953843	0.11238	1.0154e-05	0.00045683	0.112608	0.0222274		0.0104608	0.28963	1.05501	0.947861	0.112381	9.50847e-06	0.000456842	0.112609	0.0208137		-0.12243	0	1.05335	0.949349
						-0.277593	0.289173	1.05398	0.948781	0.117096	1.13292e-05	0.00053954	0.117366	0.020998		0	0.289173	1.055	0.94787	0.112837	9.5101e-06	0.00045683	0.113065	0.0208178		-0.40201	0.289173	1.04838	0.953853	0.112837	1.0154e-05	0.00045683	0.113065	0.0222274		0.0104642	0.289173	1.055	0.947871	0.112838	9.50847e-06	0.000456842	0.113066	0.0208137		-0.122887	0	1.05335	0.949349
						-0.27788	0.288716	1.05397	0.948793	0.117636	1.1366e-05	0.000541268	0.117907	0.0209989		0	0.288716	1.05499	0.94788	0.113294	9.5101e-06	0.00045683	0.113522	0.0208178		-0.40201	0.288716	1.04837	0.953864	0.113294	1.0154e-05	0.00045683	0.113522	0.0222274		0.0104676	0.288716	1.05499	0.94788	0.113295	9.50848e-06	0.000456842	0.113523	0.0208137		-0.123344	0	1.05335	0.94935
						-0.27817	0.288259	1.05396	0.948804	0.118177	1.1389e-05	0.000543043	0.118449	0.0209728		0	0.288259	1.05498	0.947889	0.113751	9.5101e-06	0.00045683	0.113979	0.0208178		-0.40201	0.288259	1.04836	0.953874	0.113751	1.0154e-05	0.00045683	0.113979	0.0222274		0.010471	0.288259	1.05497	0.94789	0.113752	9.50848e-06	0.000456842	0.11398	0.0208137		-0.123801	0	1.05335	0.949351
						-0.278464	0.287803	1.05395	0.948815	0.11872	1.14263e-05	0.000544866	0.118993	0.0209711		0	0.287803	1.05497	0.947899	0.114207	9.5101e-06	0.00045683	0.114436	0.0208178		-0.40201	0.287803	1.04835	0.953884	0.114207	1.0154e-05	0.00045683	0.114436	0.0222274		0.0104744	0.287803	1.05496	0.947899	0.114208	9.50848e-06	0.000456843	0.114437	0.0208137		-0.124258	0	1.05335	0.949352
						-0.278761	0.287346	1.05393	0.948827	0.119265	1.14652e-05	0.00054674	0.119539	0.0209703		0	0.287346	1.05495	0.947908	0.114664	9.5101e-06	0.00045683	0.114893	0.0208178		-0.40201	0.287346	1.04833	0.953894	0.114664	1.0154e-05	0.00045683	0.114893	0.0222274		0.0104778	0.287346	1.05495	0.947909	0.114665	9.50849e-06	0.000456843	0.114894	0.0208137		-0.124714	0	1.05335	0.949352
						-0.279061	0.286889	1.05392	0.948838	0.119812	1.15048e-05	0.000548664	0.120086	0.0209689		0	0.286889	1.05494	0.947918	0.115121	9.5101e-06	0.00045683	0.115349	0.0208178		-0.40201	0.286889	1.04832	0.953904	0.115121	1.0154e-05	0.00045683	0.115349	0.0222274		0.0104813	0.286889	1.05494	0.947918	0.115122	9.50849e-06	0.000456843	0.115351	0.0208137		-0.125171	0	1.05335	0.949353
						-0.279365	0.286432	1.05391	0.94885	0.120361	1.09589e-05	0.000550642	0.120636	0.0199022		0	0.286432	1.05493	0.947927	0.115578	8.74567e-06	0.00045683	0.115806	0.0191445		-0.40201	0.286432	1.04831	0.953914	0.115578	9.55431e-06	0.00045683	0.115806	0.0209146		0.0104848	0.286432	1.05493	0.947928	0.115579	8.74162e-06	0.000456843	0.115807	0.019135		-0.125628	0	1.05335	0.949354
						-0.279672	0.285975	1.0539	0.948861	0.120911	1.09977e-05	0.000552561	0.121187	0.0199034		0	0.285975	1.05492	0.947936	0.116035	8.74567e-06	0.00045683	0.116263	0.0191445		-0.40201	0.285975	1.0483	0.953924	0.116035	9.55431e-06	0.00045683	0.116263	0.0209146		0.0104883	0.285975	1.05492	0.947937	0.116036	8.74416e-06	0.000456843	0.116264	0.0191406		-0.126085	0	1.05335	0.949354
						-0.279983	0.285519	1.05388	0.948872	0.121464	1.10363e-05	0.000554529	0.121741	0.0199024		0	0.285519	1.05491	0.947945	0.116492	8.74567e-06	0.00045683	0.11672	0.0191445		-0.40201	0.285519	1.04829	0.953933	0.116492	9.55431e-06	0.00045683	0.11672	0.0209146		0.0104918	0.285519	1.05491	0.947945	0.116493	8.74417e-06	0.000456843	0.116721	0.0191406		-0.126542	0	1.05335	0.949355
						-0.280297	0.285062	1.05387	0.948883	0.122018	1.10748e-05	0.000556549	0.122297	0.0198992		0	0.285062	1.0549	0.947953	0.116948	8.74567e-06	0.00045683	0.117177	0.0191445		-0.40201	0.285062	1.04828	0.953943	0.116948	9.55431e-06	0.00045683	0.117177	0.0209146		0.0104953	0.285062	1.0549	0.947954	0.116949	8.74417e-06	0.000456843	0.117178	0.0191406		-0.126999	0	1.05335	0.949356
						-0.280615	0.284605	1.05386	0.948894	0.122575	1.11158e-05	0.000558621	0.122854	0.0198988		0	0.284605	1.05489	0.947962	0.117405	8.74567e-06	0.00045683	0.117634	0.0191445		-0.40201	0.284605	1.04827	0.953953	0.117405	9.55431e-06	0.00045683	0.117634	0.0209146		0.0104989	0.284605	1.05489	0.947963	0.117406	8.74417e-06	0.000456844	0.117635	0.0191406		-0.127455	0	1.05334	0.949357
						-0.280937	0.284148	1.05385	0.948905	0.123133	1.11575e-05	0.000560748	0.123414	0.0198978		0	0.284148	1.05488	0.947971	0.117862	8.74567e-06	0.00045683	0.11809	0.0191445		-0.40201	0.284148	1.04826	0.953962	0.117862	9.55431e-06	0.00045683	0.11809	0.0209146		0.0105024	0.284148	1.05488	0.947972	0.117863	8.74418e-06	0.000456844	0.118092	0.0191406		-0.127912	0	1.05334	0.949358
						-0.281262	0.283691	1.05383	0.948916	0.123694	1.13574e-05	0.00056293	0.123976	0.0201757		0	0.283691	1.05488	0.94798	0.118319	8.74567e-06	0.00045683	0.118547	0.0191445		-0.40201	0.283691	1.04825	0.953972	0.118319	9.55431e-06	0.00045683	0.118547	0.0209146		0.010506	0.283691	1.05487	0.94798	0.11832	8.74418e-06	0.000456844	0.118548	0.0191406		-0.128369	0	1.05334	0.949358
						-0.281591	0.283234	1.05382	0.948927	0.124257	1.1529e-05	0.000565211	0.12454	0.0203978		0	0.283234	1.05487	0.947988	0.118776	8.74567e-06	0.00045683	0.119004	0.0191445		-0.40201	0.283234	1.04824	0.953981	0.118776	9.55431e-06	0.00045683	0.119004	0.0209146		0.0105096	0.283234	1.05486	0.947989	0.118777	8.74418e-06	0.000456844	0.119005	0.0191406		-0.128826	0	1.05334	0.949359
						-0.281924	0.282778	1.05381	0.948939	0.124822	1.1578e-05	0.000567588	0.125106	0.0203989		0	0.282778	1.05486	0.947997	0.119233	8.74567e-06	0.00045683	0.119461	0.0191445		-0.40201	0.282778	1.04823	0.953991	0.119233	9.55431e-06	0.00045683	0.119461	0.0209146		0.0105132	0.282778	1.05485	0.947998	0.119234	8.74419e-06	0.000456844	0.119462	0.0191406		-0.129283	0	1.05334	0.94936
						-0.282261	0.282321	1.0538	0.948951	0.12539	1.16353e-05	0.00057003	0.125675	0.0204119		0	0.282321	1.05485	0.948006	0.119689	8.74567e-06	0.00045683	0.119918	0.0191445		-0.40201	0.282321	1.04822	0.954	0.119689	9.55431e-06	0.00045683	0.119918	0.0209146		0.0105169	0.282321	1.05484	0.948007	0.119691	8.74419e-06	0.000456844	0.119919	0.0191406		-0.12974	0	1.05334	0.949361
						-0.282601	0.281864	1.05378	0.948962	0.12596	1.16869e-05	0.000572537	0.126246	0.0204126		0	0.281864	1.05484	0.948015	0.120146	8.74567e-06	0.00045683	0.120375	0.0191445		-0.40201	0.281864	1.04821	0.95401	0.120146	8.50077e-06	0.00045683	0.120375	0.0186084		0.0105205	0.281864	1.05484	0.948015	0.120147	8.74419e-06	0.000456844	0.120376	0.0191406		-0.130196	0	1.05334	0.949361
						-0.282947	0.281407	1.05377	0.948974	0.126533	1.12076e-05	0.000575114	0.12682	0.0194878		0	0.281407	1.05483	0.948023	0.120603	8.05646e-06	0.00045683	0.120831	0.0176358		-0.40201	0.281407	1.0482	0.954018	0.120603	8.50077e-06	0.00045683	0.120831	0.0186084		0.0105242	0.281407	1.05483	0.948024	0.120604	8.05257e-06	0.000456845	0.120833	0.0176267		-0.130653	0	1.05334	0.949362
						-0.283296	0.28095	1.05376	0.948985	0.127108	1.1258e-05	0.000577628	0.127396	0.0194902		0	0.28095	1.05482	0.948031	0.12106	8.05646e-06	0.00045683	0.121288	0.0176358		-0.40201	0.28095	1.04819	0.954027	0.12106	8.50077e-06	0.00045683	0.121288	0.0186084		0.0105279	0.28095	1.05482	0.948032	0.121061	8.05496e-06	0.000456845	0.121289	0.0176319		-0.13111	0	1.05334	0.949363
						-0.283649	0.280493	1.05374	0.948996	0.127685	1.13092e-05	0.000580206	0.127975	0.0194919		0	0.280493	1.05481	0.948039	0.121517	8.05646e-06	0.00045683	0.121745	0.0176358		-0.40201	0.280493	1.04818	0.954035	0.121517	8.50077e-06	0.00045683	0.121745	0.0186084		0.0105316	0.280493	1.05481	0.94804	0.121518	8.05508e-06	0.000456845	0.121746	0.0176322		-0.131567	0	1.05334	0.949364
						-0.284007	0.280037	1.05373	0.949008	0.128265	1.13615e-05	0.000582852	0.128557	0.019493		0	0.280037	1.0548	0.948047	0.121974	8.05646e-06	0.00045683	0.122202	0.0176358		-0.40201	0.280037	1.04817	0.954044	0.121974	8.50077e-06	0.00045683	0.122202	0.0186084		0.0105353	0.280037	1.0548	0.948048	0.121975	8.05509e-06	0.000456845	0.122203	0.0176322		-0.132024	0	1.05334	0.949365
						-0.284369	0.27958	1.05372	0.949019	0.128848	1.14287e-05	0.000585565	0.129141	0.0195176		0	0.27958	1.05479	0.948055	0.12243	8.05646e-06	0.00045683	0.122659	0.0176358		-0.40201	0.27958	1.04816	0.954052	0.12243	8.50077e-06	0.00045683	0.122659	0.0186084		0.0105391	0.27958	1.05479	0.948056	0.122432	8.05509e-06	0.000456845	0.12266	0.0176322		-0.132481	0	1.05334	0.949365
						-0.284735	0.279123	1.05371	0.94903	0.129434	1.14887e-05	0.000588349	0.129728	0.0195271		0	0.279123	1.05478	0.948064	0.122887	8.05646e-06	0.00045683	0.123116	0.0176358		-0.40201	0.279123	1.04815	0.954061	0.122887	8.50077e-06	0.00045683	0.123116	0.0186084		0.0105428	0.279123	1.05478	0.948064	0.122888	8.05509e-06	0.000456845	0.123117	0.0176322		-0.132937	0	1.05333	0.949366
						-0.285106	0.278666	1.05369	0.949042	0.130022	1.15439e-05	0.000591206	0.130318	0.0195263		0	0.278666	1.05477	0.948072	0.123344	8.05646e-06	0.00045683	0.123572	0.0176358		-0.40201	0.278666	1.04814	0.954069	0.123344	8.50077e-06	0.00045683	0.123572	0.0186084		0.0105466	0.278666	1.05477	0.948072	0.123345	8.05509e-06	0.000456845	0.123574	0.0176322		-0.133394	0	1.05333	0.949367
						-0.285482	0.278209	1.05368	0.949053	0.130613	1.16002e-05	0.000594136	0.13091	0.0195247		0	0.278209	1.05476	0.94808	0.123801	8.05646e-06	0.00045683	0.124029	0.0176358		-0.40201	0.278209	1.04813	0.954078	0.123801	8.50077e-06	0.00045683	0.124029	0.0186084		0.0105504	0.278209	1.05476	0.94808	0.123802	8.0551e-06	0.000456846	0.124031	0.0176322		-0.133851	0	1.05333	0.949368
						-0.285861	0.277752	1.05367	0.949065	0.131208	1.16576e-05	0.000597143	0.131506	0.0195224		0	0.277752	1.05475	0.948088	0.124258	8.05646e-06	0.00045683	0.124486	0.0176358		-0.40201	0.277752	1.04812	0.954086	0.124258	8.50077e-06	0.00045683	0.124486	0.0186084		0.0105542	0.277752	1.05475	0.948089	0.124259	8.0551e-06	0.000456846	0.124487	0.0176322		-0.134308	0	1.05333	0.949369
						-0.286246	0.277296	1.05366	0.949077	0.131805	1.19125e-05	0.000600229	0.132105	0.0198468		0	0.277296	1.05475	0.948096	0.124714	8.05646e-06	0.00045683	0.124943	0.0176358		-0.40201	0.277296	1.04811	0.954095	0.124714	8.50077e-06	0.00045683	0.124943	0.0186084		0.0105581	0.277296	1.05474	0.948097	0.124716	8.0551e-06	0.000456846	0.124944	0.0176322		-0.134765	0	1.05333	0.949369
						-0.286635	0.276839	1.05364	0.949089	0.132405	1.21818e-05	0.000603493	0.132707	0.0201857		0	0.276839	1.05474	0.948104	0.125171	8.05646e-06	0.00045683	0.1254	0.0176358		-0.40201	0.276839	1.0481	0.954103	0.125171	8.50077e-06	0.00045683	0.1254	0.0186084		0.0105619	0.276839	1.05474	0.948105	0.125173	8.05511e-06	0.000456846	0.125401	0.0176322		-0.135222	0	1.05333	0.94937
						-0.28703	0.276382	1.05363	0.949101	0.133008	1.17755e-05	0.00060694	0.133312	0.0194017		0	0.276382	1.05473	0.948112	0.125628	7.43333e-06	0.00045683	0.125857	0.0162717		-0.40201	0.276382	1.0481	0.954112	0.125628	8.50077e-06	0.00045683	0.125857	0.0186084		0.0105658	0.276382	1.05473	0.948113	0.12563	7.42971e-06	0.000456846	0.125858	0.0162632		-0.135678	0	1.05333	0.949371
						-0.287429	0.275925	1.05362	0.949113	0.133615	1.18434e-05	0.000610325	0.133921	0.0194052		0	0.275925	1.05472	0.948119	0.126085	7.43333e-06	0.00045683	0.126313	0.0162717		-0.40201	0.275925	1.04809	0.95412	0.126085	8.50077e-06	0.00045683	0.126313	0.0186084		0.0105697	0.275925	1.05472	0.94812	0.126086	7.43175e-06	0.000456846	0.126315	0.0162677		-0.136135	0	1.05333	0.949372
						-0.287834	0.275468	1.0536	0.949124	0.134226	1.19125e-05	0.000613798	0.134533	0.019408		0	0.275468	1.05471	0.948127	0.126542	7.43333e-06	0.00045683	0.12677	0.0162717		-0.40201	0.275468	1.04808	0.954129	0.126542	8.50077e-06	0.00045683	0.12677	0.0186084		0.0105736	0.275468	1.05471	0.948128	0.126543	7.43208e-06	0.000456847	0.126772	0.0162684		-0.136592	0	1.05333	0.949373
						-0.288244	0.275011	1.05359	0.949136	0.134839	1.19829e-05	0.000617361	0.135148	0.01941		0	0.275011	1.0547	0.948134	0.126999	7.43333e-06	0.00045683	0.127227	0.0162717		-0.40201	0.275011	1.04807	0.954137	0.126999	8.50077e-06	0.00045683	0.127227	0.0186084		0.0105775	0.275011	1.0547	0.948135	0.127	7.43208e-06	0.000456847	0.127228	0.0162684		-0.137049	0	1.05333	0.949374
						-0.288659	0.274555	1.05358	0.949148	0.135457	1.20546e-05	0.000621016	0.135767	0.0194113		0	0.274555	1.05469	0.948142	0.127455	7.43333e-06	0.00045683	0.127684	0.0162717		-0.40201	0.274555	1.04806	0.954146	0.127455	8.50077e-06	0.00045683	0.127684	0.0186084		0.0105815	0.274555	1.05469	0.948142	0.127457	7.43208e-06	0.000456847	0.127685	0.0162684		-0.137506	0	1.05332	0.949375
						-0.28908	0.274098	1.05356	0.94916	0.136078	1.21672e-05	0.000624766	0.13639	0.019475		0	0.274098	1.05469	0.948149	0.127912	7.43333e-06	0.00045683	0.128141	0.0162717		-0.40201	0.274098	1.04805	0.954154	0.127912	8.50077e-06	0.00045683	0.128141	0.0186084		0.0105855	0.274098	1.05469	0.94815	0.127914	7.43209e-06	0.000456847	0.128142	0.0162684		-0.137963	0	1.05332	0.949375
						-0.289506	0.273641	1.05355	0.949173	0.136703	1.22466e-05	0.000628613	0.137017	0.0194821		0	0.273641	1.05468	0.948156	0.128369	7.43333e-06	0.00045683	0.128598	0.0162717		-0.40201	0.273641	1.04804	0.954163	0.128369	8.50077e-06	0.00045683	0.128598	0.0186084		0.0105895	0.273641	1.05468	0.948157	0.128371	7.43209e-06	0.000456847	0.128599	0.0162684		-0.138419	0	1.05332	0.949376
						-0.289938	0.273184	1.05354	0.949185	0.137331	1.23227e-05	0.00063256	0.137648	0.0194808		0	0.273184	1.05467	0.948164	0.128826	7.43333e-06	0.00045683	0.129054	0.0162717		-0.40201	0.273184	1.04803	0.954171	0.128826	8.50077e-06	0.00045683	0.129054	0.0186084		0.0105935	0.273184	1.05467	0.948165	0.128827	7.43209e-06	0.000456847	0.129056	0.0162684		-0.138876	0	1.05332	0.949377
						-0.290375	0.272727	1.05352	0.949197	0.137964	1.24002e-05	0.00063661	0.138282	0.0194787		0	0.272727	1.05466	0.948171	0.129283	7.43333e-06	0.00045683	0.129511	0.0162717		-0.40201	0.272727	1.04802	0.95418	0.129283	8.50077e-06	0.00045683	0.129511	0.0186084		0.0105975	0.272727	1.05466	0.948172	0.129284	7.4321e-06	0.000456848	0.129513	0.0162684		-0.139333	0	1.05332	0.949378
						-0.290819	0.27227	1.05351	0.94921	0.1386	1.24793e-05	0.000640765	0.138921	0.0194758		0	0.27227	1.05465	0.948179	0.12974	7.43333e-06	0.00045683	0.129968	0.0162717		-0.40201	0.27227	1.04801	0.954188	0.12974	8.50077e-06	0.00045683	0.129968	0.0186084		0.0106015	0.27227	1.05465	0.94818	0.129741	7.4321e-06	0.000456848	0.12997	0.0162684		-0.13979	0	1.05332	0.949379
						-0.291268	0.271814	1.05349	0.949222	0.139241	1.28687e-05	0.000645028	0.139564	0.0199507		0	0.271814	1.05465	0.948186	0.130196	7.43333e-06	0.00045683	0.130425	0.0162717		-0.40201	0.271814	1.048	0.954197	0.130196	8.50077e-06	0.00045683	0.130425	0.0186084		0.0106056	0.271814	1.05464	0.948187	0.130198	7.4321e-06	0.000456848	0.130426	0.0162684		-0.140247	0	1.05332	0.94938
						-0.291723	0.271357	1.05348	0.949235	0.139886	1.26267e-05	0.000642647	0.140208	0.0196482		0	0.271357	1.05464	0.948194	0.130653	6.8685e-06	0.00045683	0.130882	0.0150353		-0.40201	0.271357	1.04799	0.954205	0.130653	8.50077e-06	0.00045683	0.130882	0.0186084		0.0106097	0.271357	1.05464	0.948194	0.130655	6.86512e-06	0.000456848	0.130883	0.0150273		-0.140704	0	1.05332	0.949381
						-0.29218	0.270905	1.05347	0.949248	0.140529	1.25462e-05	0.000638413	0.140848	0.0196524		0	0.2709	1.05463	0.948201	0.13111	6.8685e-06	0.00045683	0.131339	0.0150353		-0.40201	0.2709	1.04798	0.954214	0.13111	8.50077e-06	0.00045683	0.131339	0.0186084		0.0106138	0.2709	1.05463	0.948201	0.131112	6.86683e-06	0.000456848	0.13134	0.015031		-0.14116	0	1.05332	0.949382
						-0.292637	0.270459	1.05345	0.94926	0.141167	1.24675e-05	0.000634299	0.141484	0.0196557		0	0.270443	1.05462	0.948207	0.131567	6.8685e-06	0.00045683	0.131795	0.0150353		-0.40201	0.270443	1.04797	0.954222	0.131567	8.50077e-06	0.00045683	0.131795	0.0186084		0.0106179	0.270443	1.05462	0.948208	0.131569	6.86736e-06	0.000456848	0.131797	0.0150322		-0.141617	0	1.05332	0.949383
						-0.293094	0.270019	1.05344	0.949273	0.141802	1.23904e-05	0.000630302	0.142117	0.0196581		0	0.269986	1.05461	0.948214	0.132024	6.8685e-06	0.00045683	0.132252	0.0150353		-0.40201	0.269986	1.04796	0.954231	0.132024	8.50077e-06	0.00045683	0.132252	0.0186084		0.0106221	0.269986	1.05461	0.948215	0.132025	6.86737e-06	0.000456849	0.132254	0.0150322		-0.142074	0	1.05331	0.949384
						-0.293551	0.269585	1.05342	0.949285	0.142432	1.2315e-05	0.000626418	0.142745	0.0196596		0	0.269529	1.05461	0.948221	0.132481	6.8685e-06	0.00045683	0.132709	0.0150353		-0.40201	0.269529	1.04796	0.954239	0.132481	8.50077e-06	0.00045683	0.132709	0.0186084		0.0106262	0.269529	1.05461	0.948222	0.132482	6.86737e-06	0.000456849	0.132711	0.0150322		-0.142531	0	1.05331	0.949385
						-0.294008	0.269156	1.05341	0.949297	0.143058	1.22861e-05	0.000622643	0.14337	0.0197324		0	0.269073	1.0546	0.948228	0.132937	6.8685e-06	0.00045683	0.133166	0.0150353		-0.40201	0.269073	1.04795	0.954248	0.132937	8.50077e-06	0.00045683	0.133166	0.0186084		0.0106304	0.269073	1.0546	0.948229	0.132939	6.86737e-06	0.000456849	0.133168	0.0150322		-0.142988	0	1.05331	0.949386
						-0.294464	0.268733	1.0534	0.94931	0.143681	1.22338e-05	0.000618973	0.14399	0.0197648		0	0.268616	1.05459	0.948235	0.133394	6.8685e-06	0.00045683	0.133623	0.0150353		-0.40201	0.268616	1.04794	0.954256	0.133394	8.50077e-06	0.00045683	0.133623	0.0186084		0.0106346	0.268616	1.05459	0.948236	0.133396	6.86738e-06	0.000456849	0.133624	0.0150322		-0.143444	0	1.05331	0.949386
						-0.294921	0.268315	1.05338	0.949322	0.1443	1.21627e-05	0.000615406	0.144608	0.0197638		0	0.268159	1.05458	0.948242	0.133851	6.8685e-06	0.00045683	0.134079	0.0150353		-0.40201	0.268159	1.04793	0.954265	0.133851	8.50077e-06	0.00045683	0.134079	0.0186084		0.0106389	0.268159	1.05458	0.948242	0.133853	6.86738e-06	0.000456849	0.134081	0.0150322		-0.143901	0	1.05331	0.949387
						-0.295378	0.267903	1.05337	0.949334	0.144915	1.2093e-05	0.000611938	0.145221	0.0197621		0	0.267702	1.05458	0.948249	0.134308	6.8685e-06	0.00045683	0.134536	0.0150353		-0.40201	0.267702	1.04792	0.954273	0.134308	8.50077e-06	0.00045683	0.134536	0.0186084		0.0106431	0.267702	1.05457	0.948249	0.13431	6.86738e-06	0.00045685	0.134538	0.0150322		-0.144358	0	1.05331	0.949388
						-0.295835	0.267496	1.05336	0.949346	0.145527	1.20249e-05	0.000608566	0.145832	0.0197596		0	0.267245	1.05457	0.948255	0.134765	6.8685e-06	0.00045683	0.134993	0.0150353		-0.40201	0.267245	1.04791	0.954282	0.134765	8.50077e-06	0.00045683	0.134993	0.0186084		0.0106474	0.267245	1.05457	0.948256	0.134766	6.86739e-06	0.00045685	0.134995	0.0150322		-0.144815	0	1.05331	0.949389
						-0.296292	0.267094	1.05334	0.949358	0.146136	1.22662e-05	0.000605286	0.146438	0.0202654		0	0.266788	1.05456	0.948262	0.135222	6.8685e-06	0.00045683	0.13545	0.0150353		-0.40201	0.266788	1.0479	0.95429	0.135222	8.50077e-06	0.00045683	0.13545	0.0186084		0.0106517	0.266788	1.05456	0.948263	0.135223	6.86739e-06	0.00045685	0.135452	0.0150322		-0.145272	0	1.05331	0.94939
						-0.296749	0.266697	1.05333	0.94937	0.146741	1.24616e-05	0.000602003	0.147042	0.0207004		0	0.266332	1.05455	0.948269	0.135678	6.35526e-06	0.00045683	0.135907	0.0139118		-0.40201	0.266332	1.04789	0.954299	0.135678	7.52535e-06	0.00045683	0.135907	0.0164731		0.010656	0.266332	1.05455	0.94827	0.13568	6.35214e-06	0.00045685	0.135909	0.0139043		-0.145729	0	1.05331	0.949391
						-0.297205	0.266304	1.05332	0.949383	0.147343	1.20749e-05	0.000598756	0.147642	0.0201668		0	0.265875	1.05455	0.948276	0.136135	6.35526e-06	0.00045683	0.136364	0.0139118		-0.40201	0.265875	1.04788	0.954306	0.136135	7.52535e-06	0.00045683	0.136364	0.0164731		0.0106603	0.265875	1.05454	0.948276	0.136137	6.35353e-06	0.00045685	0.136365	0.0139074		-0.146185	0	1.05331	0.949392
						-0.297662	0.265917	1.0533	0.949395	0.147942	1.20152e-05	0.0005957	0.14824	0.0201701		0	0.265418	1.05454	0.948282	0.136592	6.35526e-06	0.00045683	0.13682	0.0139118		-0.40201	0.265418	1.04787	0.954314	0.136592	7.52535e-06	0.00045683	0.13682	0.0164731		0.0106646	0.265418	1.05454	0.948283	0.136594	6.35425e-06	0.000456851	0.136822	0.0139089		-0.146642	0	1.0533	0.949393
						-0.298119	0.265535	1.05329	0.949407	0.148538	1.19568e-05	0.000592729	0.148834	0.0201726		0	0.264961	1.05453	0.948288	0.137049	6.35526e-06	0.00045683	0.137277	0.0139118		-0.40201	0.264961	1.04786	0.954322	0.137049	7.52535e-06	0.00045683	0.137277	0.0164731		0.010669	0.264961	1.05453	0.948289	0.137051	6.35425e-06	0.000456851	0.137279	0.0139089		-0.147099	0	1.0533	0.949394
						-0.298576	0.265157	1.05328	0.949419	0.14913	1.18995e-05	0.000589841	0.149425	0.0201743		0	0.264504	1.05452	0.948295	0.137506	6.35526e-06	0.00045683	0.137734	0.0139118		-0.40201	0.264504	1.04786	0.954329	0.137506	7.52535e-06	0.00045683	0.137734	0.0164731		0.0106734	0.264504	1.05452	0.948295	0.137508	6.35425e-06	0.000456851	0.137736	0.0139089		-0.147556	0	1.0533	0.949395
						-0.299033	0.264784	1.05326	0.949431	0.14972	1.18435e-05	0.000587033	0.150014	0.0201754		0	0.264048	1.05452	0.948301	0.137963	6.35526e-06	0.00045683	0.138191	0.0139118		-0.40201	0.264048	1.04785	0.954337	0.137963	7.52535e-06	0.00045683	0.138191	0.0164731		0.0106778	0.264048	1.05452	0.948302	0.137964	6.35426e-06	0.000456851	0.138193	0.0139089		-0.148013	0	1.0533	0.949396
						-0.29949	0.264416	1.05325	0.949443	0.150307	1.18575e-05	0.000584303	0.150599	0.0202936		0	0.263591	1.05451	0.948307	0.138419	6.35526e-06	0.00045683	0.138648	0.0139118		-0.40201	0.263591	1.04784	0.954344	0.138419	7.52535e-06	0.00045683	0.138648	0.0164731		0.0106822	0.263591	1.05451	0.948308	0.138421	6.35426e-06	0.000456851	0.13865	0.0139089		-0.14847	0	1.0533	0.949397
						-0.299946	0.264051	1.05324	0.949454	0.150891	1.18131e-05	0.000581647	0.151182	0.0203099		0	0.263134	1.0545	0.948314	0.138876	6.35526e-06	0.00045683	0.139105	0.0139118		-0.40201	0.263134	1.04783	0.954352	0.138876	7.52535e-06	0.00045683	0.139105	0.0164731		0.0106867	0.263134	1.0545	0.948314	0.138878	6.35426e-06	0.000456852	0.139107	0.0139089		-0.148926	0	1.0533	0.949398
						-0.300403	0.263691	1.05322	0.949466	0.151473	1.176e-05	0.000579064	0.151763	0.0203088		0	0.262677	1.0545	0.94832	0.139333	6.35526e-06	0.00045683	0.139561	0.0139118		-0.40201	0.262677	1.04782	0.954359	0.139333	7.52535e-06	0.00045683	0.139561	0.0164731		0.0106912	0.262677	1.0545	0.948321	0.139335	6.35427e-06	0.000456852	0.139563	0.0139089		-0.149383	0	1.0533	0.949399
						-0.30086	0.263335	1.05321	0.949478	0.152052	1.1708e-05	0.000576552	0.15234	0.0203071		0	0.26222	1.05449	0.948326	0.13979	6.35526e-06	0.00045683	0.140018	0.0139118		-0.40201	0.26222	1.04782	0.954367	0.13979	7.52535e-06	0.00045683	0.140018	0.0164731		0.0106957	0.26222	1.05449	0.948327	0.139792	6.35427e-06	0.000456852	0.14002	0.0139089		-0.14984	0	1.0533	0.9494
						-0.301317	0.262984	1.0532	0.94949	0.152629	1.20092e-05	0.000574107	0.152916	0.0209182		0	0.261763	1.05448	0.948333	0.140247	6.35526e-06	0.00045683	0.140475	0.0139118		-0.40201	0.261763	1.04781	0.954374	0.140247	7.14348e-06	0.00045683	0.140475	0.0156372		0.0107002	0.261763	1.05448	0.948334	0.140249	6.35427e-06	0.000456852	0.140477	0.0139089		-0.150297	0	1.0533	0.949401
						-0.301774	0.262636	1.05318	0.949502	0.153203	1.22094e-05	0.00057163	0.153489	0.0213591		0	0.261307	1.05448	0.948339	0.140704	5.88787e-06	0.00045683	0.140932	0.0128887		-0.40201	0.261307	1.0478	0.954381	0.140704	7.14348e-06	0.00045683	0.140932	0.0156372		0.0107047	0.261307	1.05447	0.94834	0.140706	5.88498e-06	0.000456852	0.140934	0.0128817		-0.150754	0	1.05329	0.949402
						-0.302231	0.262292	1.05317	0.949514	0.153774	1.22159e-05	0.000569155	0.154059	0.0214634		0	0.26085	1.05447	0.948345	0.14116	5.88787e-06	0.00045683	0.141389	0.0128887		-0.40201	0.26085	1.04779	0.954388	0.14116	7.14348e-06	0.00045683	0.141389	0.0156372		0.0107093	0.26085	1.05447	0.948346	0.141162	5.88608e-06	0.000456853	0.141391	0.0128841		-0.151211	0	1.05329	0.949403
						-0.302687	0.261953	1.05316	0.949526	0.154344	1.21932e-05	0.000566751	0.154627	0.0215144		0	0.260393	1.05446	0.948351	0.141617	5.88787e-06	0.00045683	0.141846	0.0128887		-0.40201	0.260393	1.04778	0.954396	0.141617	7.14348e-06	0.00045683	0.141846	0.0156372		0.0107139	0.260393	1.05446	0.948352	0.141619	5.88697e-06	0.000456853	0.141848	0.012886		-0.151667	0	1.05329	0.949405
						-0.303144	0.261617	1.05314	0.949538	0.15491	1.2125e-05	0.000564416	0.155193	0.0214826		0	0.259936	1.05446	0.948357	0.142074	5.88787e-06	0.00045683	0.142302	0.0128887		-0.40201	0.259936	1.04778	0.954403	0.142074	7.14348e-06	0.00045683	0.142302	0.0156372		0.0107185	0.259936	1.05445	0.948358	0.142076	5.88697e-06	0.000456853	0.142305	0.012886		-0.152124	0	1.05329	0.949406
						-0.303601	0.261286	1.05313	0.94955	0.155475	1.18132e-05	0.000562152	0.155756	0.0210144		0	0.259479	1.05445	0.948363	0.142531	5.88787e-06	0.00045683	0.142759	0.0128887		-0.40201	0.259479	1.04777	0.95441	0.142531	7.14348e-06	0.00045683	0.142759	0.0156372		0.0107231	0.259479	1.05445	0.948363	0.142533	5.88698e-06	0.000456853	0.142761	0.012886		-0.152581	0	1.05329	0.949407
						-0.304058	0.260958	1.05312	0.949562	0.156037	1.17692e-05	0.00056001	0.156317	0.0210162		0	0.259022	1.05444	0.948369	0.142988	5.88787e-06	0.00045683	0.143216	0.0128887		-0.40201	0.259022	1.04776	0.954417	0.142988	7.14348e-06	0.00045683	0.143216	0.0156372		0.0107278	0.259022	1.05444	0.948369	0.14299	5.88698e-06	0.000456853	0.143218	0.012886		-0.153038	0	1.05329	0.949408
						-0.304515	0.260635	1.0531	0.949574	0.156597	1.17261e-05	0.000557928	0.156876	0.0210174		0	0.258566	1.05444	0.948374	0.143444	5.88787e-06	0.00045683	0.143673	0.0128887		-0.40201	0.258566	1.04775	0.954424	0.143444	7.14348e-06	0.00045683	0.143673	0.0156372		0.0107324	0.258566	1.05444	0.948375	0.143447	5.88698e-06	0.000456854	0.143675	0.012886		-0.153495	0	1.05329	0.949409
						-0.304972	0.260314	1.05309	0.949586	0.157155	1.17073e-05	0.000555902	0.157433	0.0210602		0	0.258109	1.05443	0.94838	0.143901	5.88787e-06	0.00045683	0.14413	0.0128887		-0.40201	0.258109	1.04774	0.954431	0.143901	7.14348e-06	0.00045683	0.14413	0.0156372		0.0107371	0.258109	1.05443	0.948381	0.143904	5.88699e-06	0.000456854	0.144132	0.012886		-0.153952	0	1.05329	0.94941
						-0.305428	0.259997	1.05308	0.949597	0.157711	1.17308e-05	0.000553931	0.157988	0.0211775		0	0.257652	1.05442	0.948386	0.144358	5.88787e-06	0.00045683	0.144587	0.0128887		-0.40201	0.257652	1.04774	0.954438	0.144358	7.14348e-06	0.00045683	0.144587	0.0156372		0.0107418	0.257652	1.05442	0.948387	0.14436	5.88699e-06	0.000456854	0.144589	0.012886		-0.154408	0	1.05328	0.949411
						-0.305885	0.259684	1.05306	0.949609	0.158265	1.16898e-05	0.000552014	0.158541	0.0211768		0	0.257195	1.05442	0.948392	0.144815	5.88787e-06	0.00045683	0.145043	0.0128887		-0.40201	0.257195	1.04773	0.954446	0.144815	7.14348e-06	0.00045683	0.145043	0.0156372		0.0107466	0.257195	1.05442	0.948393	0.144817	5.88699e-06	0.000456854	0.145046	0.0128861		-0.154865	0	1.05328	0.949412
						-0.306342	0.259374	1.05305	0.949621	0.158817	1.20437e-05	0.000550148	0.159092	0.0218919		0	0.256738	1.05441	0.948398	0.145272	5.88787e-06	0.00045683	0.1455	0.0128887		-0.40201	0.256738	1.04772	0.954453	0.145272	7.14348e-06	0.00045683	0.1455	0.0156372		0.0107513	0.256738	1.05441	0.948399	0.145274	5.887e-06	0.000456855	0.145503	0.0128861		-0.155322	0	1.05328	0.949413
						-0.306799	0.259068	1.05304	0.949633	0.159367	1.22848e-05	0.000548252	0.159641	0.0224075		0	0.256281	1.0544	0.948404	0.145729	5.46132e-06	0.00045683	0.145957	0.0119549		-0.40201	0.256281	1.04771	0.95446	0.145729	6.72063e-06	0.00045683	0.145957	0.0147116		0.0107561	0.256281	1.0544	0.948405	0.145731	5.45867e-06	0.000456855	0.145959	0.0119485		-0.155779	0	1.05328	0.949414
						-0.307256	0.258765	1.05302	0.949645	0.159915	1.22433e-05	0.000546354	0.160188	0.0224093		0	0.255825	1.0544	0.948409	0.146185	5.46132e-06	0.00045683	0.146414	0.0119549		-0.40201	0.255825	1.04771	0.954467	0.146185	6.72063e-06	0.00045683	0.146414	0.0147116		0.0107609	0.255825	1.0544	0.94841	0.146188	5.45949e-06	0.000456855	0.146416	0.0119503		-0.156236	0	1.05328	0.949415
						-0.307712	0.258465	1.05301	0.949657	0.160461	1.22026e-05	0.000544509	0.160734	0.0224106		0	0.255368	1.05439	0.948415	0.146642	5.46132e-06	0.00045683	0.146871	0.0119549		-0.40201	0.255368	1.0477	0.954473	0.146642	6.72063e-06	0.00045683	0.146871	0.0147116		0.0107658	0.255368	1.05439	0.948416	0.146645	5.46054e-06	0.000456855	0.146873	0.0119526		-0.156693	0	1.05328	0.949417
						-0.308169	0.258169	1.053	0.94967	0.161006	1.22271e-05	0.000542717	0.161277	0.0225296		0	0.254911	1.05438	0.94842	0.147099	5.46132e-06	0.00045683	0.147328	0.0119549		-0.40201	0.254911	1.04769	0.95448	0.147099	6.72063e-06	0.00045683	0.147328	0.0147116		0.0107706	0.254911	1.05438	0.948421	0.147101	5.46054e-06	0.000456856	0.14733	0.0119526		-0.157149	0	1.05328	0.949418
						-0.308626	0.257876	1.05298	0.949682	0.161549	1.22199e-05	0.000540976	0.161819	0.0225889		0	0.254454	1.05438	0.948426	0.147556	5.46132e-06	0.00045683	0.147784	0.0119549		-0.40201	0.254454	1.04768	0.954487	0.147556	6.72063e-06	0.00045683	0.147784	0.0147116		0.0107755	0.254454	1.05438	0.948426	0.147558	5.46055e-06	0.000456856	0.147787	0.0119526		-0.157606	0	1.05328	0.949419
						-0.309083	0.257586	1.05297	0.949694	0.16209	1.21813e-05	0.000539284	0.162359	0.0225882		0	0.253997	1.05437	0.948431	0.148013	5.46132e-06	0.00045683	0.148241	0.0119549		-0.40201	0.253997	1.04768	0.954494	0.148013	6.72063e-06	0.00045683	0.148241	0.0147116		0.0107804	0.253997	1.05437	0.948432	0.148015	5.46055e-06	0.000456856	0.148244	0.0119526		-0.158063	0	1.05327	0.94942
						-0.30954	0.257299	1.05296	0.949706	0.162629	1.21435e-05	0.000537638	0.162898	0.0225869		0	0.25354	1.05437	0.948437	0.14847	5.46132e-06	0.00045683	0.148698	0.0119549		-0.40201	0.25354	1.04767	0.9545	0.14847	6.72063e-06	0.00045683	0.148698	0.0147116		0.0107853	0.25354	1.05437	0.948437	0.148472	5.46055e-06	0.000456856	0.1487	0.0119526		-0.15852	0	1.05327	0.949421
						-0.309997	0.257016	1.05294	0.949718	0.163167	1.21064e-05	0.000536039	0.163435	0.0225852		0	0.253084	1.05436	0.948442	0.148926	5.46132e-06	0.00045683	0.149155	0.0119549		-0.40201	0.253084	1.04766	0.954507	0.148926	6.72063e-06	0.00045683	0.149155	0.0147116		0.0107903	0.253084	1.05436	0.948443	0.148929	5.46056e-06	0.000456857	0.149157	0.0119526		-0.158977	0	1.05327	0.949422
						-0.310453	0.256735	1.05293	0.949731	0.163703	1.20701e-05	0.000534483	0.16397	0.0225829		0	0.252627	1.05435	0.948448	0.149383	5.46132e-06	0.00045683	0.149612	0.0119549		-0.40201	0.252627	1.04765	0.954514	0.149383	6.72063e-06	0.00045683	0.149612	0.0147116		0.0107952	0.252627	1.05435	0.948448	0.149386	5.46056e-06	0.000456857	0.149614	0.0119526		-0.159434	0	1.05327	0.949423
						-0.31091	0.256458	1.05292	0.949743	0.164237	1.19554e-05	0.00053297	0.164504	0.0224318		0	0.25217	1.05435	0.948453	0.14984	5.46132e-06	0.00045683	0.150069	0.0119549		-0.40201	0.25217	1.04765	0.95452	0.14984	6.72063e-06	0.00045683	0.150069	0.0147116		0.0108002	0.25217	1.05435	0.948454	0.149843	5.46056e-06	0.000456857	0.150071	0.0119526		-0.15989	0	1.05327	0.949425
						-0.311367	0.256183	1.0529	0.949755	0.16477	1.23129e-05	0.00053151	0.165036	0.0231662		0	0.251713	1.05434	0.948459	0.150297	5.46132e-06	0.00045683	0.150525	0.0119549		-0.40201	0.251713	1.04764	0.954527	0.150297	6.72063e-06	0.00045683	0.150525	0.0147116		0.0108052	0.251713	1.05434	0.948459	0.150299	5.46057e-06	0.000456857	0.150528	0.0119526		-0.160347	0	1.05327	0.949426
						-0.311824	0.255912	1.05289	0.949767	0.165302	1.26139e-05	0.000530056	0.165567	0.0237976		0	0.251256	1.05434	0.948464	0.150754	5.07129e-06	0.00045683	0.150982	0.0111011		-0.40201	0.251256	1.04763	0.954534	0.150754	6.35833e-06	0.00045683	0.150982	0.0139185		0.0108103	0.251256	1.05434	0.948465	0.150756	5.06886e-06	0.000456858	0.150985	0.0110952		-0.160804	0	1.05327	0.949427
						-0.312281	0.255643	1.05288	0.949779	0.165832	1.25809e-05	0.000528604	0.166096	0.0238004		0	0.250799	1.05433	0.948469	0.151211	5.07129e-06	0.00045683	0.151439	0.0111011		-0.40201	0.250799	1.04762	0.95454	0.151211	6.35833e-06	0.00045683	0.151439	0.0139185		0.0108154	0.250799	1.05433	0.94847	0.151213	5.06942e-06	0.000456858	0.151442	0.0110964		-0.161261	0	1.05327	0.949428
						-0.312738	0.255377	1.05286	0.949792	0.16636	1.25485e-05	0.000527192	0.166624	0.0238027		0	0.250343	1.05433	0.948474	0.151667	5.07129e-06	0.00045683	0.151896	0.0111011		-0.40201	0.250343	1.04762	0.954547	0.151667	6.35833e-06	0.00045683	0.151896	0.0139185		0.0108204	0.250343	1.05432	0.948475	0.15167	5.07061e-06	0.000456858	0.151898	0.011099		-0.161718	0	1.05326	0.949429
						-0.313194	0.255114	1.05285	0.949805	0.166887	1.25167e-05	0.000525819	0.16715	0.0238045		0	0.249886	1.05432	0.948479	0.152124	5.07129e-06	0.00045683	0.152353	0.0111011		-0.40201	0.249886	1.04761	0.954553	0.152124	6.35833e-06	0.00045683	0.152353	0.0139185		0.0108256	0.249886	1.05432	0.94848	0.152127	5.07062e-06	0.000456858	0.152355	0.011099		-0.162175	0	1.05326	0.949431
						-0.313651	0.254853	1.05283	0.949817	0.167413	1.24856e-05	0.000524485	0.167676	0.0238057		0	0.249429	1.05431	0.948484	0.152581	5.07129e-06	0.00045683	0.15281	0.0111011		-0.40201	0.249429	1.0476	0.954559	0.152581	6.35833e-06	0.00045683	0.15281	0.0139185		0.0108307	0.249429	1.05431	0.948485	0.152584	5.07062e-06	0.000456859	0.152812	0.011099		-0.162631	0	1.05326	0.949432
						-0.314108	0.254596	1.05282	0.94983	0.167938	1.24551e-05	0.000523187	0.168199	0.0238065		0	0.248972	1.05431	0.948489	0.153038	5.07129e-06	0.00045683	0.153266	0.0111011		-0.40201	0.248972	1.0476	0.954566	0.153038	6.35833e-06	0.00045683	0.153266	0.0139185		0.0108359	0.248972	1.05431	0.94849	0.153041	5.07062e-06	0.000456859	0.153269	0.011099		-0.163088	0	1.05326	0.949433
						-0.314565	0.254341	1.05281	0.949842	0.168461	1.25161e-05	0.000521925	0.168722	0.0239808		0	0.248515	1.0543	0.948494	0.153495	5.07129e-06	0.00045683	0.153723	0.0111011		-0.40201	0.248515	1.04759	0.954572	0.153495	6.35833e-06	0.00045683	0.153723	0.0139185		0.010841	0.248515	1.0543	0.948495	0.153497	5.07063e-06	0.000456859	0.153726	0.011099		-0.163545	0	1.05326	0.949434
						-0.315022	0.254088	1.05279	0.949855	0.168983	1.24975e-05	0.000520697	0.169243	0.0240017		0	0.248058	1.0543	0.948499	0.153952	5.07129e-06	0.00045683	0.15418	0.0111011		-0.40201	0.248058	1.04758	0.954578	0.153952	6.35833e-06	0.00045683	0.15418	0.0139185		0.0108463	0.248058	1.0543	0.9485	0.153954	5.07063e-06	0.00045686	0.154183	0.011099		-0.164002	0	1.05326	0.949436
						-0.315479	0.253838	1.05278	0.949867	0.169504	1.24684e-05	0.000519502	0.169763	0.0240009		0	0.247602	1.05429	0.948505	0.154408	5.07129e-06	0.00045683	0.154637	0.0111011		-0.40201	0.247602	1.04758	0.954585	0.154408	6.35833e-06	0.00045683	0.154637	0.0139185		0.0108515	0.247602	1.05429	0.948505	0.154411	5.07063e-06	0.00045686	0.15464	0.011099		-0.164459	0	1.05326	0.949437
						-0.315935	0.253591	1.05277	0.94988	0.170023	1.24399e-05	0.000518339	0.170282	0.0239997		0	0.247145	1.05429	0.94851	0.154865	5.07129e-06	0.00045683	0.155094	0.0111011		-0.40201	0.247145	1.04757	0.954591	0.154865	6.35833e-06	0.00045683	0.155094	0.0139185		0.0108568	0.247145	1.05428	0.94851	0.154868	5.07064e-06	0.00045686	0.155097	0.011099		-0.164915	0	1.05325	0.949438
						-0.316392	0.253346	1.05275	0.949892	0.170541	1.28968e-05	0.000517206	0.1708	0.0249357		0	0.246688	1.05428	0.948515	0.155322	5.07129e-06	0.00045683	0.15555	0.0111011		-0.40201	0.246688	1.04756	0.954597	0.155322	6.04782e-06	0.00045683	0.15555	0.0132388		0.010862	0.246688	1.05428	0.948515	0.155325	5.07064e-06	0.000456861	0.155553	0.011099		-0.165372	0	1.05325	0.949439
						-0.316849	0.253104	1.05274	0.949905	0.171059	1.32155e-05	0.000516056	0.171317	0.0256088		0	0.246231	1.05427	0.94852	0.155779	4.71397e-06	0.00045683	0.156007	0.010319		-0.40201	0.246231	1.04756	0.954603	0.155779	6.04782e-06	0.00045683	0.156007	0.0132388		0.0108674	0.246231	1.05427	0.94852	0.155782	4.71176e-06	0.000456861	0.15601	0.0103134		-0.165829	0	1.05325	0.949441
						-0.317306	0.252864	1.05272	0.949918	0.171575	1.31865e-05	0.000514905	0.171832	0.0256099		0	0.245774	1.05427	0.948524	0.156236	4.71397e-06	0.00045683	0.156464	0.010319		-0.40201	0.245774	1.04755	0.95461	0.156236	6.04782e-06	0.00045683	0.156464	0.0132388		0.0108727	0.245774	1.05427	0.948525	0.156239	4.71208e-06	0.000456861	0.156467	0.0103141		-0.166286	0	1.05325	0.949442
						-0.317763	0.252626	1.05271	0.949931	0.17209	1.32368e-05	0.000513786	0.172346	0.0257635		0	0.245317	1.05426	0.948529	0.156693	4.71397e-06	0.00045683	0.156921	0.010319		-0.40201	0.245317	1.04754	0.954616	0.156693	6.04782e-06	0.00045683	0.156921	0.0132388		0.0108781	0.245317	1.05426	0.94853	0.156696	4.7134e-06	0.000456861	0.156924	0.010317		-0.166743	0	1.05325	0.949443
						-0.31822	0.252391	1.05269	0.949945	0.172603	1.32384e-05	0.000512698	0.17286	0.0258213		0	0.244861	1.05426	0.948534	0.157149	4.71397e-06	0.00045683	0.157378	0.010319		-0.40201	0.244861	1.04754	0.954622	0.157149	6.04782e-06	0.00045683	0.157378	0.0132388		0.0108835	0.244861	1.05426	0.948535	0.157152	4.71341e-06	0.000456862	0.157381	0.010317		-0.1672	0	1.05325	0.949445
						-0.318676	0.252158	1.05268	0.949958	0.173116	1.32108e-05	0.00051164	0.173372	0.0258207		0	0.244404	1.05425	0.948539	0.157606	4.71397e-06	0.00045683	0.157835	0.010319		-0.40201	0.244404	1.04753	0.954628	0.157606	6.04782e-06	0.00045683	0.157835	0.0132388		0.0108889	0.244404	1.05425	0.948539	0.157609	4.71341e-06	0.000456862	0.157838	0.010317		-0.167656	0	1.05325	0.949446
						-0.319133	0.251928	1.05266	0.949971	0.173628	1.31837e-05	0.000510612	0.173883	0.0258197		0	0.243947	1.05425	0.948543	0.158063	4.71397e-06	0.00045683	0.158291	0.010319		-0.40201	0.243947	1.04752	0.954634	0.158063	6.04782e-06	0.00045683	0.158291	0.0132388		0.0108943	0.243947	1.05425	0.948544	0.158066	4.71341e-06	0.000456862	0.158295	0.010317		-0.168113	0	1.05324	0.949447
						-0.31959	0.2517	1.05265	0.949984	0.174138	1.31572e-05	0.000509611	0.174393	0.0258183		0	0.24349	1.05424	0.948548	0.15852	4.71397e-06	0.00045683	0.158748	0.010319		-0.40201	0.24349	1.04752	0.95464	0.15852	6.04782e-06	0.00045683	0.158748	1.32388
[truncated: 5 more columns]

## Sheet: Conductance matrix
																				0.943727	0.943211	0.942719	0.942251	0.941804	0.941379	0.940975	0.940591	0.940225	0.939877	0.939545	0.93923	0.938929	0.938643	0.938371	0.938112	0.937865	0.93763	0.937406	0.937193	0.936991	0.936798	0.936614	0.936439	0.936273	0.936114	0.935964	0.93582	0.935683	0.935553
																				0.945994	0.945519	0.94507	0.944645	0.944245	0.943868	0.943511	0.943175	0.942857	0.942557	0.942273	0.942003	0.941748	0.941505	0.941275	0.941056	0.940848	0.94065	0.940462	0.940282	0.940111	0.939949	0.939794	0.939647	0.939506	0.939372	0.939245	0.939123	0.939008	0.938897
																				0.947298	0.94684	0.946409	0.946005	0.945627	0.945273	0.944941	0.94463	0.944339	0.944065	0.943807	0.943563	0.943333	0.943116	0.94291	0.942714	0.942529	0.942353	0.942185	0.942026	0.941874	0.94173	0.941592	0.941461	0.941336	0.941217	0.941104	0.940996	0.940892	0.940794
																				0.948241	0.94779	0.947368	0.946975	0.946609	0.946269	0.945953	0.945658	0.945383	0.945126	0.944885	0.944659	0.944447	0.944247	0.944057	0.943879	0.943709	0.943549	0.943396	0.943251	0.943113	0.942982	0.942857	0.942738	0.942625	0.942516	0.942413	0.942315	0.942221	0.942131
																				0.948982	0.948533	0.948115	0.947728	0.947369	0.947037	0.94673	0.946445	0.946181	0.945936	0.945708	0.945494	0.945295	0.945107	0.944931	0.944764	0.944607	0.944458	0.944317	0.944183	0.944056	0.943935	0.94382	0.94371	0.943606	0.943506	0.943411	0.94332	0.943234	0.943151
																				0.949591	0.949141	0.948725	0.94834	0.947984	0.947657	0.947356	0.947078	0.946822	0.946585	0.946365	0.946161	0.94597	0.945792	0.945625	0.945468	0.94532	0.945181	0.945049	0.944923	0.944805	0.944692	0.944585	0.944483	0.944386	0.944293	0.944205	0.944121	0.94404	0.943964
																				0.950105	0.949654	0.949237	0.948852	0.948498	0.948174	0.947876	0.947602	0.947351	0.94712	0.946906	0.946708	0.946525	0.946354	0.946194	0.946045	0.945904	0.945772	0.945647	0.945529	0.945417	0.945311	0.945211	0.945115	0.945024	0.944937	0.944854	0.944776	0.9447	0.944628
																				0.95055	0.950096	0.949677	0.949291	0.948937	0.948613	0.948317	0.948046	0.947798	0.947571	0.947362	0.947169	0.94699	0.946825	0.946671	0.946527	0.946392	0.946266	0.946147	0.946035	0.945928	0.945828	0.945733	0.945642	0.945556	0.945475	0.945397	0.945322	0.945251	0.945184
																				0.95094	0.950483	0.950061	0.949674	0.949319	0.948995	0.948699	0.948429	0.948183	0.947958	0.947751	0.947562	0.947387	0.947226	0.947076	0.946937	0.946807	0.946685	0.946571	0.946463	0.946362	0.946266	0.946175	0.946089	0.946008	0.94593	0.945856	0.945786	0.945719	0.945655
																				0.951286	0.950825	0.950401	0.950011	0.949655	0.949329	0.949033	0.948764	0.948518	0.948294	0.94809	0.947903	0.947731	0.947572	0.947426	0.94729	0.947164	0.947046	0.946935	0.946832	0.946734	0.946642	0.946555	0.946473	0.946395	0.946321	0.94625	0.946183	0.94612	0.946059
																				0.951596	0.951132	0.950704	0.950312	0.949953	0.949627	0.949329	0.949059	0.948814	0.948591	0.948387	0.948202	0.948031	0.947875	0.947731	0.947598	0.947474	0.947359	0.947252	0.947151	0.947057	0.946968	0.946884	0.946805	0.94673	0.946659	0.946592	0.946528	0.946467	0.946409
																				0.951875	0.951408	0.950977	0.950583	0.950222	0.949893	0.949594	0.949323	0.949077	0.948854	0.948651	0.948466	0.948297	0.948142	0.948	0.947869	0.947747	0.947634	0.947529	0.947431	0.94734	0.947253	0.947172	0.947096	0.947024	0.946955	0.94689	0.946829	0.94677	0.946715
																				0.952129	0.951659	0.951225	0.950828	0.950464	0.950133	0.949833	0.949561	0.949314	0.94909	0.948887	0.948702	0.948534	0.94838	0.948238	0.948109	0.947989	0.947878	0.947775	0.947679	0.947589	0.947505	0.947426	0.947352	0.947282	0.947216	0.947153	0.947094	0.947037	0.946984
																				0.952361	0.951888	0.951451	0.951051	0.950685	0.950352	0.95005	0.949776	0.949528	0.949303	0.949099	0.948914	0.948746	0.948592	0.948452	0.948323	0.948204	0.948095	0.947993	0.947899	0.947811	0.947728	0.947651	0.947579	0.947511	0.947447	0.947386	0.947328	0.947274	0.947222
																				0.952574	0.952098	0.951659	0.951256	0.950887	0.950552	0.950248	0.949972	0.949722	0.949497	0.949292	0.949107	0.948938	0.948785	0.948644	0.948516	0.948398	0.948289	0.948189	0.948095	0.948009	0.947928	0.947852	0.947782	0.947715	0.947652	0.947593	0.947537	0.947484	0.947434
																				0.95277	0.952291	0.951849	0.951444	0.951073	0.950736	0.950429	0.950152	0.949901	0.949673	0.949468	0.949282	0.949113	0.948959	0.948819	0.94869	0.948573	0.948465	0.948365	0.948273	0.948187	0.948107	0.948033	0.947963	0.947898	0.947837	0.947779	0.947725	0.947673	0.947624
																				0.952951	0.95247	0.952026	0.951618	0.951245	0.950905	0.950597	0.950317	0.950064	0.949836	0.949629	0.949442	0.949272	0.949118	0.948977	0.948849	0.948732	0.948624	0.948524	0.948433	0.948348	0.948269	0.948196	0.948127	0.948063	0.948003	0.947946	0.947893	0.947842	0.947795
																				0.953119	0.952636	0.952189	0.951779	0.951404	0.951062	0.950751	0.95047	0.950216	0.949985	0.949777	0.949589	0.949418	0.949263	0.949123	0.948994	0.948877	0.948769	0.94867	0.948578	0.948494	0.948416	0.948343	0.948275	0.948212	0.948153	0.948097	0.948045	0.947995	0.947949
																				0.953275	0.95279	0.952342	0.951929	0.951552	0.951208	0.950895	0.950612	0.950356	0.950124	0.949915	0.949725	0.949553	0.949398	0.949256	0.949127	0.949009	0.948901	0.948803	0.948711	0.948627	0.948549	0.948477	0.94841	0.948348	0.948289	0.948234	0.948183	0.948134	0.948089
																				0.953421	0.952934	0.952483	0.952069	0.95169	0.951344	0.951029	0.950744	0.950486	0.950253	0.950042	0.949851	0.949678	0.949522	0.949379	0.94925	0.949132	0.949024	0.948924	0.948833	0.94875	0.948672	0.9486	0.948533	0.948471	0.948413	0.948359	0.948308	0.94826	0.948215
																				0.953557	0.953068	0.952616	0.9522	0.951818	0.95147	0.951154	0.950867	0.950608	0.950373	0.95016	0.949968	0.949794	0.949637	0.949494	0.949363	0.949245	0.949136	0.949037	0.948946	0.948862	0.948784	0.948713	0.948646	0.948584	0.948527	0.948473	0.948423	0.948376	0.948331
																				0.953684	0.953193	0.95274	0.952322	0.951939	0.951589	0.951271	0.950983	0.950721	0.950485	0.950271	0.950077	0.949902	0.949744	0.9496	0.949469	0.949349	0.94924	0.949141	0.949049	0.948965	0.948888	0.948816	0.94875	0.948688	0.948631	0.948578	0.948528	0.948481	0.948437
																				0.953803	0.953311	0.952856	0.952437	0.952052	0.951701	0.951381	0.951091	0.950828	0.95059	0.950374	0.95018	0.950003	0.949844	0.949699	0.949567	0.949447	0.949337	0.949237	0.949145	0.949061	0.948983	0.948912	0.948846	0.948784	0.948727	0.948674	0.948625	0.948578	0.948535
																				0.953914	0.953422	0.952965	0.952545	0.952159	0.951805	0.951484	0.951192	0.950928	0.950688	0.950472	0.950275	0.950098	0.949937	0.949791	0.949658	0.949538	0.949428	0.949327	0.949235	0.94915	0.949072	0.949	0.948934	0.948873	0.948816	0.948763	0.948714	0.948668	0.948624
																				0.954019	0.953526	0.953068	0.952646	0.952259	0.951904	0.951581	0.951288	0.951022	0.950781	0.950563	0.950365	0.950187	0.950025	0.949878	0.949744	0.949623	0.949512	0.94941	0.949318	0.949233	0.949155	0.949083	0.949016	0.948955	0.948898	0.948845	0.948796	0.94875	0.948707
																				0.954118	0.953623	0.953165	0.952742	0.952353	0.951997	0.951673	0.951378	0.951111	0.950868	0.950649	0.95045	0.95027	0.950107	0.949959	0.949825	0.949702	0.949591	0.949489	0.949396	0.94931	0.949232	0.949159	0.949093	0.949031	0.948974	0.948922	0.948872	0.948827	0.948784
																				0.954211	0.953716	0.953256	0.952832	0.952442	0.952085	0.951759	0.951463	0.951194	0.950951	0.95073	0.95053	0.950349	0.950185	0.950036	0.9499	0.949777	0.949665	0.949562	0.949468	0.949382	0.949304	0.949231	0.949164	0.949103	0.949045	0.948992	0.948943	0.948898	0.948855
																				0.954299	0.953803	0.953342	0.952917	0.952526	0.952168	0.951841	0.951544	0.951274	0.951029	0.950807	0.950606	0.950423	0.950258	0.950108	0.949971	0.949847	0.949734	0.949631	0.949537	0.94945	0.949371	0.949298	0.949231	0.949169	0.949112	0.949059	0.949009	0.948964	0.948921
																				0.954382	0.953885	0.953424	0.952998	0.952606	0.952246	0.951918	0.95162	0.951349	0.951102	0.950879	0.950677	0.950494	0.950327	0.950176	0.950039	0.949914	0.9498	0.949696	0.949601	0.949514	0.949434	0.949361	0.949293	0.949231	0.949174	0.94912	0.949071	0.949025	0.948983
																				0.95446	0.953963	0.953501	0.953074	0.952681	0.952321	0.951992	0.951692	0.95142	0.951172	0.950948	0.950744	0.95056	0.950393	0.95024	0.950102	0.949976	0.949862	0.949757	0.949661	0.949574	0.949494	0.94942	0.949352	0.949289	0.949232	0.949178	0.949129	0.949083	0.94904
																				0.954534	0.954036	0.953574	0.953146	0.952752	0.952391	0.952061	0.95176	0.951487	0.951239	0.951013	0.950809	0.950623	0.950455	0.950301	0.950162	0.950036	0.94992	0.949815	0.949719	0.94963	0.94955	0.949475	0.949407	0.949344	0.949286	0.949233	0.949183	0.949137	0.949094
																				0.954604	0.954106	0.953643	0.953215	0.95282	0.952458	0.952127	0.951825	0.951551	0.951301	0.951075	0.950869	0.950683	0.950513	0.950359	0.950219	0.950092	0.949976	0.949869	0.949773	0.949684	0.949603	0.949528	0.949459	0.949396	0.949338	0.949284	0.949234	0.949187	0.949144
																				0.95467	0.954172	0.953708	0.953279	0.952884	0.952521	0.95219	0.951887	0.951611	0.951361	0.951134	0.950927	0.95074	0.950569	0.950414	0.950273	0.950145	0.950028	0.949921	0.949824	0.949734	0.949652	0.949577	0.949508	0.949444	0.949386	0.949331	0.949281	0.949235	0.949192
																				0.954733	0.954234	0.95377	0.953341	0.952945	0.952582	0.952249	0.951946	0.951669	0.951418	0.951189	0.950982	0.950794	0.950622	0.950467	0.950325	0.950196	0.950078	0.94997	0.949872	0.949782	0.9497	0.949624	0.949554	0.94949	0.949431	0.949377	0.949326	0.94928	0.949236
																				0.954792	0.954293	0.953829	0.953399	0.953003	0.952639	0.952305	0.952001	0.951724	0.951472	0.951243	0.951034	0.950845	0.950673	0.950516	0.950374	0.950244	0.950125	0.950017	0.949918	0.949827	0.949745	0.949668	0.949598	0.949534	0.949474	0.949419	0.949369	0.949322	0.949278
																				0.954849	0.954349	0.953885	0.953455	0.953058	0.952693	0.952359	0.952054	0.951776	0.951523	0.951293	0.951084	0.950894	0.950721	0.950564	0.95042	0.950289	0.95017	0.950061	0.949962	0.949871	0.949787	0.94971	0.94964	0.949575	0.949515	0.94946	0.949409	0.949362	0.949318
																				0.954902	0.954403	0.953938	0.953508	0.95311	0.952745	0.95241	0.952105	0.951826	0.951572	0.951341	0.951131	0.95094	0.950767	0.950608	0.950464	0.950333	0.950213	0.950103	0.950003	0.949911	0.949827	0.94975	0.949679	0.949614	0.949554	0.949498	0.949447	0.949399	0.949355
																				0.954953	0.954453	0.953989	0.953558	0.95316	0.952794	0.952459	0.952153	0.951873	0.951619	0.951387	0.951176	0.950985	0.95081	0.950651	0.950506	0.950374	0.950254	0.950144	0.950043	0.94995	0.949866	0.949788	0.949716	0.949651	0.94959	0.949534	0.949482	0.949435	0.94939
																				0.955001	0.954502	0.954037	0.953606	0.953207	0.952841	0.952505	0.952198	0.951918	0.951663	0.951431	0.951219	0.951027	0.950852	0.950692	0.950547	0.950414	0.950293	0.950182	0.95008	0.949987	0.949902	0.949824	0.949752	0.949686	0.949625	0.949568	0.949516	0.949468	0.949424
																				0.955047	0.954547	0.954082	0.953651	0.953252	0.952886	0.952549	0.952242	0.951961	0.951706	0.951473	0.95126	0.951067	0.950891	0.950731	0.950585	0.950451	0.950329	0.950218	0.950116	0.950022	0.949937	0.949858	0.949786	0.949719	0.949658	0.949601	0.949549	0.9495	0.949455
																				0.95509	0.954591	0.954126	0.953694	0.953295	0.952928	0.952591	0.952284	0.952002	0.951746	0.951512	0.9513	0.951106	0.950929	0.950768	0.950621	0.950487	0.950365	0.950253	0.95015	0.950056	0.94997	0.949891	0.949818	0.949751	0.949689	0.949632	0.949579	0.94953	0.949485
																				0.955132	0.954632	0.954167	0.953735	0.953336	0.952969	0.952631	0.952323	0.952041	0.951785	0.95155	0.951337	0.951142	0.950965	0.950804	0.950656	0.950521	0.950398	0.950286	0.950182	0.950088	0.950001	0.949922	0.949848	0.949781	0.949719	0.949661	0.949608	0.949559	0.949514
																				0.955171	0.954671	0.954206	0.953774	0.953375	0.953007	0.95267	0.952361	0.952079	0.951821	0.951587	0.951372	0.951177	0.951	0.950838	0.950689	0.950554	0.95043	0.950317	0.950213	0.950118	0.950031	0.949951	0.949877	0.949809	0.949747	0.949689	0.949636	0.949586	0.949541
																				0.955208	0.954709	0.954243	0.953811	0.953412	0.953044	0.952706	0.952397	0.952114	0.951856	0.951621	0.951406	0.951211	0.951033	0.95087	0.950721	0.950585	0.950461	0.950347	0.950243	0.950148	0.95006	0.949979	0.949905	0.949837	0.949774	0.949716	0.949662	0.949612	0.949566
																				0.955244	0.954744	0.954279	0.953847	0.953447	0.953079	0.952741	0.952431	0.952148	0.95189	0.951654	0.951439	0.951243	0.951064	0.950901	0.950751	0.950615	0.95049	0.950376	0.950271	0.950175	0.950087	0.950006	0.949931	0.949863	0.949799	0.949741	0.949687	0.949637	0.949591
																				0.955277	0.954778	0.954313	0.95388	0.95348	0.953112	0.952774	0.952464	0.95218	0.951921	0.951685	0.95147	0.951273	0.951094	0.95093	0.95078	0.950643	0.950518	0.950403	0.950298	0.950202	0.950113	0.950032	0.949956	0.949887	0.949824	0.949765	0.949711	0.94966	0.949614
																				0.955309	0.95481	0.954345	0.953912	0.953512	0.953144	0.952805	0.952495	0.952211	0.951952	0.951715	0.951499	0.951302	0.951122	0.950958	0.950808	0.95067	0.950545	0.95043	0.950324	0.950227	0.950138	0.950056	0.94998	0.949911	0.949847	0.949788	0.949733	0.949683	0.949636
																				0.95534	0.954841	0.954375	0.953943	0.953543	0.953174	0.952835	0.952524	0.95224	0.951981	0.951744	0.951527	0.95133	0.95115	0.950985	0.950834	0.950696	0.95057	0.950455	0.950348	0.950251	0.950162	0.950079	0.950003	0.949933	0.949869	0.94981	0.949755	0.949704	0.949657
																				0.955369	0.95487	0.954404	0.953972	0.953572	0.953203	0.952863	0.952553	0.952268	0.952008	0.951771	0.951554	0.951356	0.951176	0.95101	0.950859	0.950721	0.950594	0.950478	0.950372	0.950274	0.950184	0.950101	0.950025	0.949955	0.94989	0.94983	0.949775	0.949724	0.949677
																				0.955396	0.954897	0.954432	0.953999	0.953599	0.95323	0.952891	0.95258	0.952295	0.952035	0.951797	0.95158	0.951381	0.9512	0.951035	0.950883	0.950744	0.950617	0.950501	0.950394	0.950296	0.950206	0.950123	0.950046	0.949975	0.94991	0.94985	0.949795	0.949743	0.949696
																				0.955422	0.954924	0.954458	0.954026	0.953625	0.953256	0.952917	0.952605	0.95232	0.95206	0.951822	0.951604	0.951405	0.951224	0.951058	0.950906	0.950767	0.950639	0.950523	0.950415	0.950317	0.950226	0.950143	0.950066	0.949995	0.949929	0.949869	0.949813	0.949761	0.949714
																				0.955447	0.954948	0.954483	0.954051	0.95365	0.953281	0.952941	0.952629	0.952344	0.952083	0.951845	0.951627	0.951428	0.951246	0.95108	0.950928	0.950788	0.95066	0.950543	0.950435	0.950337	0.950246	0.950162	0.950084	0.950013	0.949948	0.949887	0.949831	0.949779	0.949731
																				0.955471	0.954972	0.954507	0.954074	0.953674	0.953304	0.952964	0.952653	0.952367	0.952106	0.951868	0.951649	0.95145	0.951268	0.951101	0.950948	0.950809	0.95068	0.950563	0.950455	0.950355	0.950264	0.95018	0.950102	0.950031	0.949965	0.949904	0.949847	0.949795	0.949747
																				0.955493	0.954994	0.954529	0.954097	0.953696	0.953326	0.952987	0.952675	0.952389	0.952128	0.951889	0.95167	0.951471	0.951288	0.951121	0.950968	0.950828	0.9507	0.950582	0.950473	0.950374	0.950282	0.950197	0.95012	0.950048	0.949981	0.94992	0.949863	0.949811	0.949762
																				0.955514	0.955016	0.95455	0.954118	0.953717	0.953348	0.953008	0.952695	0.95241	0.952148	0.951909	0.95169	0.95149	0.951308	0.95114	0.950987	0.950846	0.950718	0.950599	0.950491	0.950391	0.950299	0.950214	0.950136	0.950064	0.949997	0.949936	0.949879	0.949826	0.949777
																				0.955534	0.955036	0.954571	0.954138	0.953737	0.953368	0.953028	0.952715	0.952429	0.952168	0.951928	0.951709	0.951509	0.951326	0.951158	0.951005	0.950864	0.950735	0.950616	0.950507	0.950407	0.950315	0.95023	0.950151	0.950079	0.950012	0.94995	0.949893	0.94984	0.949791
																				0.955553	0.955055	0.95459	0.954157	0.953757	0.953387	0.953046	0.952734	0.952448	0.952186	0.951946	0.951727	0.951527	0.951343	0.951176	0.951022	0.950881	0.950751	0.950632	0.950523	0.950422	0.95033	0.950245	0.950166	0.950093	0.950026	0.949964	0.949907	0.949853	0.949804
																				0.955571	0.955073	0.954608	0.954175	0.953775	0.953405	0.953064	0.952752	0.952466	0.952203	0.951964	0.951744	0.951544	0.95136	0.951192	0.951038	0.950896	0.950767	0.950647	0.950538	0.950437	0.950344	0.950259	0.95018	0.950107	0.950039	0.949977	0.949919	0.949866	0.949817
																				0.955588	0.95509	0.954625	0.954192	0.953792	0.953422	0.953081	0.952769	0.952482	0.95222	0.95198	0.95176	0.95156	0.951376	0.951207	0.951053	0.950911	0.950781	0.950662	0.950552	0.950451	0.950358	0.950272	0.950193	0.95012	0.950052	0.94999	0.949932	0.949878	0.949828
																				0.955604	0.955106	0.954641	0.954209	0.953808	0.953438	0.953097	0.952785	0.952498	0.952236	0.951995	0.951776	0.951575	0.95139	0.951222	0.951067	0.950925	0.950795	0.950676	0.950565	0.950464	0.950371	0.950285	0.950205	0.950132	0.950064	0.950001	0.949943	0.949889	0.94984
																				0.955619	0.955121	0.954656	0.954224	0.953823	0.953453	0.953112	0.9528	0.952513	0.95225	0.95201	0.95179	0.951589	0.951404	0.951236	0.951081	0.950939	0.950808	0.950688	0.950578	0.950477	0.950383	0.950297	0.950217	0.950143	0.950075	0.950013	0.949954	0.9499	0.94985
																				0.955633	0.955135	0.95467	0.954238	0.953837	0.953467	0.953127	0.952814	0.952527	0.952264	0.952024	0.951804	0.951602	0.951418	0.951249	0.951094	0.950951	0.950821	0.950701	0.95059	0.950488	0.950394	0.950308	0.950228	0.950154	0.950086	0.950023	0.949964	0.94991	0.94986
																				0.955646	0.955149	0.954684	0.954251	0.953851	0.953481	0.95314	0.952827	0.95254	0.952277	0.952037	0.951816	0.951615	0.95143	0.951261	0.951106	0.950963	0.950832	0.950712	0.950601	0.950499	0.950405	0.950319	0.950238	0.950164	0.950096	0.950033	0.949974	0.94992	0.949869
																				0.955659	0.955161	0.954696	0.954264	0.953863	0.953493	0.953152	0.952839	0.952552	0.952289	0.952049	0.951828	0.951626	0.951442	0.951272	0.951117	0.950974	0.950843	0.950723	0.950612	0.95051	0.950415	0.950329	0.950248	0.950174	0.950106	0.950042	0.949983	0.949929	0.949878
																				0.95567	0.955173	0.954708	0.954276	0.953875	0.953505	0.953164	0.952851	0.952564	0.952301	0.95206	0.951839	0.951637	0.951452	0.951283	0.951127	0.950984	0.950853	0.950733	0.950622	0.950519	0.950425	0.950338	0.950257	0.950183	0.950114	0.950051	0.949992	0.949937	0.949886
																				0.955681	0.955184	0.954719	0.954287	0.953886	0.953516	0.953175	0.952862	0.952574	0.952311	0.95207	0.95185	0.951648	0.951463	0.951293	0.951137	0.950994	0.950863	0.950742	0.950631	0.950528	0.950434	0.950347	0.950266	0.950191	0.950123	0.950059	0.95	0.949945	0.949894
																				0.955691	0.955194	0.954729	0.954297	0.953896	0.953526	0.953185	0.952872	0.952584	0.952321	0.95208	0.951859	0.951657	0.951472	0.951302	0.951146	0.951003	0.950872	0.950751	0.950639	0.950537	0.950442	0.950355	0.950274	0.950199	0.95013	0.950066	0.950007	0.949952	0.949901
																				0.9557	0.955203	0.954738	0.954306	0.953905	0.953535	0.953194	0.952881	0.952594	0.95233	0.952089	0.951868	0.951666	0.951481	0.951311	0.951155	0.951011	0.95088	0.950759	0.950647	0.950544	0.95045	0.950362	0.950281	0.950206	0.950137	0.950073	0.950014	0.949959	0.949908
																				0.955709	0.955211	0.954747	0.954315	0.953914	0.953544	0.953203	0.952889	0.952602	0.952339	0.952098	0.951876	0.951674	0.951489	0.951319	0.951162	0.951019	0.950887	0.950766	0.950654	0.950551	0.950456	0.950369	0.950288	0.950213	0.950144	0.95008	0.95002	0.949965	0.949914
																				0.955716	0.955219	0.954755	0.954322	0.953922	0.953552	0.953211	0.952897	0.95261	0.952346	0.952105	0.951884	0.951682	0.951496	0.951326	0.95117	0.951026	0.950894	0.950773	0.950661	0.950558	0.950463	0.950375	0.950294	0.950219	0.95015	0.950085	0.950026	0.94997	0.949919
																				0.955723	0.955226	0.954762	0.95433	0.953929	0.953559	0.953218	0.952904	0.952617	0.952353	0.952112	0.951891	0.951688	0.951503	0.951332	0.951176	0.951032	0.9509	0.950779	0.950667	0.950564	0.950469	0.950381	0.9503	0.950224	0.950155	0.950091	0.950031	0.949975	0.949924
																				0.95573	0.955232	0.954768	0.954336	0.953935	0.953565	0.953224	0.952911	0.952623	0.95236	0.952118	0.951897	0.951694	0.951509	0.951338	0.951182	0.951038	0.950906	0.950784	0.950673	0.950569	0.950474	0.950386	0.950305	0.950229	0.95016	0.950095	0.950035	0.94998	0.949929
																				0.955735	0.955238	0.954774	0.954342	0.953941	0.953571	0.95323	0.952916	0.952629	0.952365	0.952124	0.951903	0.9517	0.951514	0.951343	0.951187	0.951043	0.950911	0.950789	0.950677	0.950574	0.950479	0.950391	0.950309	0.950234	0.950164	0.9501	0.95004	0.949984	0.949933
																				0.95574	0.955243	0.954779	0.954347	0.953946	0.953576	0.953235	0.952921	0.952634	0.95237	0.952129	0.951907	0.951704	0.951519	0.951348	0.951192	0.951048	0.950915	0.950794	0.950682	0.950578	0.950483	0.950395	0.950313	0.950238	0.950168	0.950103	0.950043	0.949988	0.949936
																				0.955744	0.955247	0.954783	0.954351	0.95395	0.95358	0.953239	0.952925	0.952638	0.952374	0.952133	0.951911	0.951709	0.951523	0.951352	0.951196	0.951052	0.950919	0.950797	0.950685	0.950582	0.950486	0.950398	0.950316	0.950241	0.950171	0.950107	0.950046	0.949991	0.949939
																				0.955748	0.955251	0.954787	0.954355	0.953954	0.953584	0.953243	0.952929	0.952642	0.952378	0.952136	0.951915	0.951712	0.951526	0.951355	0.951199	0.951055	0.950922	0.950801	0.950688	0.950585	0.950489	0.950401	0.950319	0.950244	0.950174	0.950109	0.950049	0.949993	0.949942
																				0.955751	0.955254	0.95479	0.954358	0.953957	0.953587	0.953246	0.952932	0.952644	0.952381	0.952139	0.951918	0.951715	0.951529	0.951358	0.951202	0.951057	0.950925	0.950803	0.950691	0.950587	0.950492	0.950403	0.950322	0.950246	0.950176	0.950112	0.950051	0.949996	0.949944
																				0.955753	0.955256	0.954792	0.95436	0.953959	0.953589	0.953248	0.952934	0.952647	0.952383	0.952141	0.95192	0.951717	0.951531	0.95136	0.951204	0.95106	0.950927	0.950805	0.950693	0.950589	0.950494	0.950405	0.950324	0.950248	0.950178	0.950113	0.950053	0.949997	0.949946
																				0.955755	0.955258	0.954794	0.954361	0.953961	0.953591	0.95325	0.952936	0.952648	0.952385	0.952143	0.951922	0.951719	0.951533	0.951362	0.951205	0.951061	0.950929	0.950807	0.950694	0.950591	0.950495	0.950407	0.950325	0.950249	0.950179	0.950114	0.950054	0.949998	0.949947
																				0.955756	0.955259	0.954795	0.954362	0.953962	0.953592	0.953251	0.952937	0.952649	0.952386	0.952144	0.951923	0.95172	0.951533	0.951363	0.951206	0.951062	0.950929	0.950807	0.950695	0.950591	0.950496	0.950407	0.950326	0.95025	0.95018	0.950115	0.950055	0.949999	0.949947
																				0.955756	0.955259	0.954795	0.954363	0.953962	0.953592	0.953251	0.952937	0.95265	0.952386	0.952144	0.951923	0.95172	0.951534	0.951363	0.951206	0.951062	0.95093	0.950808	0.950695	0.950592	0.950496	0.950408	0.950326	0.95025	0.95018	0.950115	0.950055	0.949999	0.949948
																				0.955756	0.955259	0.954795	0.954362	0.953962	0.953592	0.953251	0.952937	0.952649	0.952386	0.952144	0.951923	0.95172	0.951533	0.951363	0.951206	0.951062	0.950929	0.950807	0.950695	0.950591	0.950496	0.950407	0.950326	0.95025	0.95018	0.950115	0.950055	0.949999	0.949947
																				0.955755	0.955258	0.954794	0.954361	0.953961	0.953591	0.95325	0.952936	0.952648	0.952385	0.952143	0.951922	0.951719	0.951533	0.951362	0.951205	0.951061	0.950929	0.950807	0.950694	0.950591	0.950495	0.950407	0.950325	0.950249	0.950179	0.950114	0.950054	0.949998	0.949947
																				0.955753	0.955256	0.954792	0.95436	0.953959	0.953589	0.953248	0.952934	0.952647	0.952383	0.952141	0.95192	0.951717	0.951531	0.95136	0.951204	0.95106	0.950927	0.950805	0.950693	0.950589	0.950494	0.950405	0.950324	0.950248	0.950178	0.950113	0.950053	0.949997	0.949946
																				0.955751	0.955254	0.95479	0.954358	0.953957	0.953587	0.953246	0.952932	0.952644	0.952381	0.952139	0.951918	0.951715	0.951529	0.951358	0.951202	0.951057	0.950925	0.950803	0.950691	0.950587	0.950492	0.950403	0.950322	0.950246	0.950176	0.950112	0.950051	0.949996	0.949944
																				0.955748	0.955251	0.954787	0.954355	0.953954	0.953584	0.953243	0.952929	0.952642	0.952378	0.952136	0.951915	0.951712	0.951526	0.951355	0.951199	0.951055	0.950922	0.950801	0.950688	0.950585	0.950489	0.950401	0.950319	0.950244	0.950174	0.950109	0.950049	0.949993	0.949942
																				0.955744	0.955247	0.954783	0.954351	0.95395	0.95358	0.953239	0.952925	0.952638	0.952374	0.952133	0.951911	0.951709	0.951523	0.951352	0.951196	0.951052	0.950919	0.950797	0.950685	0.950582	0.950486	0.950398	0.950316	0.950241	0.950171	0.950107	0.950046	0.949991	0.949939
																				0.95574	0.955243	0.954779	0.954347	0.953946	0.953576	0.953235	0.952921	0.952634	0.95237	0.952129	0.951907	0.951704	0.951519	0.951348	0.951192	0.951048	0.950915	0.950794	0.950682	0.950578	0.950483	0.950395	0.950313	0.950238	0.950168	0.950103	0.950043	0.949988	0.949936
																				0.955735	0.955238	0.954774	0.954342	0.953941	0.953571	0.95323	0.952916	0.952629	0.952365	0.952124	0.951903	0.9517	0.951514	0.951343	0.951187	0.951043	0.950911	0.950789	0.950677	0.950574	0.950479	0.950391	0.950309	0.950234	0.950164	0.9501	0.95004	0.949984	0.949933
																				0.95573	0.955232	0.954768	0.954336	0.953935	0.953565	0.953224	0.952911	0.952623	0.95236	0.952118	0.951897	0.951694	0.951509	0.951338	0.951182	0.951038	0.950906	0.950784	0.950673	0.950569	0.950474	0.950386	0.950305	0.950229	0.95016	0.950095	0.950035	0.94998	0.949929
																				0.955723	0.955226	0.954762	0.95433	0.953929	0.953559	0.953218	0.952904	0.952617	0.952353	0.952112	0.951891	0.951688	0.951503	0.951332	0.951176	0.951032	0.9509	0.950779	0.950667	0.950564	0.950469	0.950381	0.9503	0.950224	0.950155	0.950091	0.950031	0.949975	0.949924
																				0.955716	0.955219	0.954755	0.954322	0.953922	0.953552	0.953211	0.952897	0.95261	0.952346	0.952105	0.951884	0.951682	0.951496	0.951326	0.95117	0.951026	0.950894	0.950773	0.950661	0.950558	0.950463	0.950375	0.950294	0.950219	0.95015	0.950085	0.950026	0.94997	0.949919
																				0.955709	0.955211	0.954747	0.954315	0.953914	0.953544	0.953203	0.952889	0.952602	0.952339	0.952098	0.951876	0.951674	0.951489	0.951319	0.951162	0.951019	0.950887	0.950766	0.950654	0.950551	0.950456	0.950369	0.950288	0.950213	0.950144	0.95008	0.95002	0.949965	0.949914
																				0.9557	0.955203	0.954738	0.954306	0.953905	0.953535	0.953194	0.952881	0.952594	0.95233	0.952089	0.951868	0.951666	0.951481	0.951311	0.951155	0.951011	0.95088	0.950759	0.950647	0.950544	0.95045	0.950362	0.950281	0.950206	0.950137	0.950073	0.950014	0.949959	0.949908
																				0.955691	0.955194	0.954729	0.954297	0.953896	0.953526	0.953185	0.952872	0.952584	0.952321	0.95208	0.951859	0.951657	0.951472	0.951302	0.951146	0.951003	0.950872	0.950751	0.950639	0.950537	0.950442	0.950355	0.950274	0.950199	0.95013	0.950066	0.950007	0.949952	0.949901
																				0.955681	0.955184	0.954719	0.954287	0.953886	0.953516	0.953175	0.952862	0.952574	0.952311	0.95207	0.95185	0.951648	0.951463	0.951293	0.951137	0.950994	0.950863	0.950742	0.950631	0.950528	0.950434	0.950347	0.950266	0.950191	0.950123	0.950059	0.95	0.949945	0.949894
																				0.95567	0.955173	0.954708	0.954276	0.953875	0.953505	0.953164	0.952851	0.952564	0.952301	0.95206	0.951839	0.951637	0.951452	0.951283	0.951127	0.950984	0.950853	0.950733	0.950622	0.950519	0.950425	0.950338	0.950257	0.950183	0.950114	0.950051	0.949992	0.949937	0.949886
																				0.955659	0.955161	0.954696	0.954264	0.953863	0.953493	0.953152	0.952839	0.952552	0.952289	0.952049	0.951828	0.951626	0.951442	0.951272	0.951117	0.950974	0.950843	0.950723	0.950612	0.95051	0.950415	0.950329	0.950248	0.950174	0.950106	0.950042	0.949983	0.949929	0.949878
																				0.955646	0.955149	0.954684	0.954251	0.953851	0.953481	0.95314	0.952827	0.95254	0.952277	0.952037	0.951816	0.951615	0.95143	0.951261	0.951106	0.950963	0.950832	0.950712	0.950601	0.950499	0.950405	0.950319	0.950238	0.950164	0.950096	0.950033	0.949974	0.94992	0.949869
																				0.955633	0.955135	0.95467	0.954238	0.953837	0.953467	0.953127	0.952814	0.952527	0.952264	0.952024	0.951804	0.951602	0.951418	0.951249	0.951094	0.950951	0.950821	0.950701	0.95059	0.950488	0.950394	0.950308	0.950228	0.950154	0.950086	0.950023	0.949964	0.94991	0.94986
																				0.955619	0.955121	0.954656	0.954224	0.953823	0.953453	0.953112	0.9528	0.952513	0.95225	0.95201	0.95179	0.951589	0.951404	0.951236	0.951081	0.950939	0.950808	0.950688	0.950578	0.950477	0.950383	0.950297	0.950217	0.950143	0.950075	0.950013	0.949954	0.9499	0.94985
																				0.955604	0.955106	0.954641	0.954209	0.953808	0.953438	0.953097	0.952785	0.952498	0.952236	0.951995	0.951776	0.951575	0.95139	0.951222	0.951067	0.950925	0.950795	0.950676	0.950565	0.950464	0.950371	0.950285	0.950205	0.950132	0.950064	0.950001	0.949943	0.949889	0.94984
																				0.955588	0.95509	0.954625	0.954192	0.953792	0.953422	0.953081	0.952769	0.952482	0.95222	0.95198	0.95176	0.95156	0.951376	0.951207	0.951053	0.950911	0.950781	0.950662	0.950552	0.950451	0.950358	0.950272	0.950193	0.95012	0.950052	0.94999	0.949932	0.949878	0.949828
																				0.955571	0.955073	0.954608	0.954175	0.953775	0.953405	0.953064	0.952752	0.952466	0.952203	0.951964	0.951744	0.951544	0.95136	0.951192	0.951038	0.950896	0.950767	0.950647	0.950538	0.950437	0.950344	0.950259	0.95018	0.950107	0.950039	0.949977	0.949919	0.949866	0.949817
																				0.955553	0.955055	0.95459	0.954157	0.953757	0.953387	0.953046	0.952734	0.952448	0.952186	0.951946	0.951727	0.951527	0.951343	0.951176	0.951022	0.950881	0.950751	0.950632	0.950523	0.950422	0.95033	0.950245	0.950166	0.950093	0.950026	0.949964	0.949907	0.949853	0.949804
																				0.955534	0.955036	0.954571	0.954138	0.953737	0.953368	0.953028	0.952715	0.952429	0.952168	0.951928	0.951709	0.951509	0.951326	0.951158	0.951005	0.950864	0.950735	0.950616	0.950507	0.950407	0.950315	0.95023	0.950151	0.950079	0.950012	0.94995	0.949893	0.94984	0.949791
																				0.955514	0.955016	0.95455	0.954118	0.953717	0.953348	0.953008	0.952695	0.95241	0.952148	0.951909	0.95169	0.95149	0.951308	0.95114	0.950987	0.950846	0.950718	0.950599	0.950491	0.950391	0.950299	0.950214	0.950136	0.950064	0.949997	0.949936	0.949879	0.949826	0.949777
																				0.955493	0.954994	0.954529	0.954097	0.953696	0.953326	0.952987	0.952675	0.952389	0.952128	0.951889	0.95167	0.951471	0.951288	0.951121	0.950968	0.950828	0.9507	0.950582	0.950473	0.950374	0.950282	0.950197	0.95012	0.950048	0.949981	0.94992	0.949863	0.949811	0.949762
																				0.955471	0.954972	0.954507	0.954074	0.953674	0.953304	0.952964	0.952653	0.952367	0.952106	0.951868	0.951649	0.95145	0.951268	0.951101	0.950948	0.950809	0.95068	0.950563	0.950455	0.950355	0.950264	0.95018	0.950102	0.950031	0.949965	0.949904	0.949847	0.949795	0.949747
																				0.955447	0.954948	0.954483	0.954051	0.95365	0.953281	0.952941	0.952629	0.952344	0.952083	0.951845	0.951627	0.951428	0.951246	0.95108	0.950928	0.950788	0.95066	0.950543	0.950435	0.950337	0.950246	0.950162	0.950084	0.950013	0.949948	0.949887	0.949831	0.949779	0.949731
																				0.955422	0.954924	0.954458	0.954026	0.953625	0.953256	0.952917	0.952605	0.95232	0.95206	0.951822	0.951604	0.951405	0.951224	0.951058	0.950906	0.950767	0.950639	0.950523	0.950415	0.950317	0.950226	0.950143	0.950066	0.949995	0.949929	0.949869	0.949813	0.949761	0.949714
																				0.955396	0.954897	0.954432	0.953999	0.953599	0.95323	0.952891	0.95258	0.952295	0.952035	0.951797	0.95158	0.951381	0.9512	0.951035	0.950883	0.950744	0.950617	0.950501	0.950394	0.950296	0.950206	0.950123	0.950046	0.949975	0.94991	0.94985	0.949795	0.949743	0.949696
																				0.955369	0.95487	0.954404	0.953972	0.953572	0.953203	0.952863	0.952553	0.952268	0.952008	0.951771	0.951554	0.951356	0.951176	0.95101	0.950859	0.950721	0.950594	0.950478	0.950372	0.950274	0.950184	0.950101	0.950025	0.949955	0.94989	0.94983	0.949775	0.949724	0.949677
																				0.95534	0.954841	0.954375	0.953943	0.953543	0.953174	0.952835	0.952524	0.95224	0.951981	0.951744	0.951527	0.95133	0.95115	0.950985	0.950834	0.950696	0.95057	0.950455	0.950348	0.950251	0.950162	0.950079	0.950003	0.949933	0.949869	0.94981	0.949755	0.949704	0.949657
																				0.955309	0.95481	0.954345	0.953912	0.953512	0.953144	0.952805	0.952495	0.952211	0.951952	0.951715	0.951499	0.951302	0.951122	0.950958	0.950808	0.95067	0.950545	0.95043	0.950324	0.950227	0.950138	0.950056	0.94998	0.949911	0.949847	0.949788	0.949733	0.949683	0.949636
																				0.955277	0.954778	0.954313	0.95388	0.95348	0.953112	0.952774	0.952464	0.95218	0.951921	0.951685	0.95147	0.951273	0.951094	0.95093	0.95078	0.950643	0.950518	0.950403	0.950298	0.950202	0.950113	0.950032	0.949956	0.949887	0.949824	0.949765	0.949711	0.94966	0.949614
																				0.955244	0.954744	0.954279	0.953847	0.953447	0.953079	0.952741	0.952431	0.952148	0.95189	0.951654	0.951439	0.951243	0.951064	0.950901	0.950751	0.950615	0.95049	0.950376	0.950271	0.950175	0.950087	0.950006	0.949931	0.949863	0.949799	0.949741	0.949687	0.949637	0.949591
																				0.955208	0.954709	0.954243	0.953811	0.953412	0.953044	0.952706	0.952397	0.952114	0.951856	0.951621	0.951406	0.951211	0.951033	0.95087	0.950721	0.950585	0.950461	0.950347	0.950243	0.950148	0.95006	0.949979	0.949905	0.949837	0.949774	0.949716	0.949662	0.949612	0.949566
																				0.955171	0.954671	0.954206	0.953774	0.953375	0.953007	0.95267	0.952361	0.952079	0.951821	0.951587	0.951372	0.951177	0.951	0.950838	0.950689	0.950554	0.95043	0.950317	0.950213	0.950118	0.950031	0.949951	0.949877	0.949809	0.949747	0.949689	0.949636	0.949586	0.949541
																				0.955132	0.954632	0.954167	0.953735	0.953336	0.952969	0.952631	0.952323	0.952041	0.951785	0.95155	0.951337	0.951142	0.950965	0.950804	0.950656	0.950521	0.950398	0.950286	0.950182	0.950088	0.950001	0.949922	0.949848	0.949781	0.949719	0.949661	0.949608	0.949559	0.949514
																				0.95509	0.954591	0.954126	0.953694	0.953295	0.952928	0.952591	0.952284	0.952002	0.951746	0.951512	0.9513	0.951106	0.950929	0.950768	0.950621	0.950487	0.950365	0.950253	0.95015	0.950056	0.94997	0.949891	0.949818	0.949751	0.949689	0.949632	0.949579	0.94953	0.949485
																				0.955047	0.954547	0.954082	0.953651	0.953252	0.952886	0.952549	0.952242	0.951961	0.951706	0.951473	0.95126	0.951067	0.950891	0.950731	0.950585	0.950451	0.950329	0.950218	0.950116	0.950022	0.949937	0.949858	0.949786	0.949719	0.949658	0.949601	0.949549	0.9495	0.949455
																				0.955001	0.954502	0.954037	0.953606	0.953207	0.952841	0.952505	0.952198	0.951918	0.951663	0.951431	0.951219	0.951027	0.950852	0.950692	0.950547	0.950414	0.950293	0.950182	0.95008	0.949987	0.949902	0.949824	0.949752	0.949686	0.949625	0.949568	0.949516	0.949468	0.949424
																				0.954953	0.954453	0.953989	0.953558	0.95316	0.952794	0.952459	0.952153	0.951873	0.951619	0.951387	0.951176	0.950985	0.95081	0.950651	0.950506	0.950374	0.950254	0.950144	0.950043	0.94995	0.949866	0.949788	0.949716	0.949651	0.94959	0.949534	0.949482	0.949435	0.94939
																				0.954902	0.954403	0.953938	0.953508	0.95311	0.952745	0.95241	0.952105	0.951826	0.951572	0.951341	0.951131	0.95094	0.950767	0.950608	0.950464	0.950333	0.950213	0.950103	0.950003	0.949911	0.949827	0.94975	0.949679	0.949614	0.949554	0.949498	0.949447	0.949399	0.949355
																				0.954849	0.954349	0.953885	0.953455	0.953058	0.952693	0.952359	0.952054	0.951776	0.951523	0.951293	0.951084	0.950894	0.950721	0.950564	0.95042	0.950289	0.95017	0.950061	0.949962	0.949871	0.949787	0.94971	0.94964	0.949575	0.949515	0.94946	0.949409	0.949362	0.949318
																				0.954792	0.954293	0.953829	0.953399	0.953003	0.952639	0.952305	0.952001	0.951724	0.951472	0.951243	0.951034	0.950845	0.950673	0.950516	0.950374	0.950244	0.950125	0.950017	0.949918	0.949827	0.949745	0.949668	0.949598	0.949534	0.949474	0.949419	0.949369	0.949322	0.949278
																				0.954733	0.954234	0.95377	0.953341	0.952945	0.952582	0.952249	0.951946	0.951669	0.951418	0.951189	0.950982	0.950794	0.950622	0.950467	0.950325	0.950196	0.950078	0.94997	0.949872	0.949782	0.9497	0.949624	0.949554	0.94949	0.949431	0.949377	0.949326	0.94928	0.949236
																				0.95467	0.954172	0.953708	0.953279	0.952884	0.952521	0.95219	0.951887	0.951611	0.951361	0.951134	0.950927	0.95074	0.950569	0.950414	0.950273	0.950145	0.950028	0.949921	0.949824	0.949734	0.949652	0.949577	0.949508	0.949444	0.949386	0.949331	0.949281	0.949235	0.949192
																				0.954604	0.954106	0.953643	0.953215	0.95282	0.952458	0.952127	0.951825	0.951551	0.951301	0.951075	0.950869	0.950683	0.950513	0.950359	0.950219	0.950092	0.949976	0.949869	0.949773	0.949684	0.949603	0.949528	0.949459	0.949396	0.949338	0.949284	0.949234	0.949187	0.949144
																				0.954534	0.954036	0.953574	0.953146	0.952752	0.952391	0.952061	0.95176	0.951487	0.951239	0.951013	0.950809	0.950623	0.950455	0.950301	0.950162	0.950036	0.94992	0.949815	0.949719	0.94963	0.94955	0.949475	0.949407	0.949344	0.949286	0.949233	0.949183	0.949137	0.949094
																				0.95446	0.953963	0.953501	0.953074	0.952681	0.952321	0.951992	0.951692	0.95142	0.951172	0.950948	0.950744	0.95056	0.950393	0.95024	0.950102	0.949976	0.949862	0.949757	0.949661	0.949574	0.949494	0.94942	0.949352	0.949289	0.949232	0.949178	0.949129	0.949083	0.94904
																				0.954382	0.953885	0.953424	0.952998	0.952606	0.952246	0.951918	0.95162	0.951349	0.951102	0.950879	0.950677	0.950494	0.950327	0.950176	0.950039	0.949914	0.9498	0.949696	0.949601	0.949514	0.949434	0.949361	0.949293	0.949231	0.949174	0.94912	0.949071	0.949025	0.948983
																				0.954299	0.953803	0.953342	0.952917	0.952526	0.952168	0.951841	0.951544	0.951274	0.951029	0.950807	0.950606	0.950423	0.950258	0.950108	0.949971	0.949847	0.949734	0.949631	0.949537	0.94945	0.949371	0.949298	0.949231	0.949169	0.949112	0.949059	0.949009	0.948964	0.948921
																				0.954211	0.953716	0.953256	0.952832	0.952442	0.952085	0.951759	0.951463	0.951194	0.950951	0.95073	0.95053	0.950349	0.950185	0.950036	0.9499	0.949777	0.949665	0.949562	0.949468	0.949382	0.949304	0.949231	0.949164	0.949103	0.949045	0.948992	0.948943	0.948898	0.948855
																				0.954118	0.953623	0.953165	0.952742	0.952353	0.951997	0.951673	0.951378	0.951111	0.950868	0.950649	0.95045	0.95027	0.950107	0.949959	0.949825	0.949702	0.949591	0.949489	0.949396	0.94931	0.949232	0.949159	0.949093	0.949031	0.948974	0.948922	0.948872	0.948827	0.948784
																				0.954019	0.953526	0.953068	0.952646	0.952259	0.951904	0.951581	0.951288	0.951022	0.950781	0.950563	0.950365	0.950187	0.950025	0.949878	0.949744	0.949623	0.949512	0.94941	0.949318	0.949233	0.949155	0.949083	0.949016	0.948955	0.948898	0.948845	0.948796	0.94875	0.948707
																				0.953914	0.953422	0.952965	0.952545	0.952159	0.951805	0.951484	0.951192	0.950928	0.950688	0.950472	0.950275	0.950098	0.949937	0.949791	0.949658	0.949538	0.949428	0.949327	0.949235	0.94915	0.949072	0.949	0.948934	0.948873	0.948816	0.948763	0.948714	0.948668	0.948624
																				0.953803	0.953311	0.952856	0.952437	0.952052	0.951701	0.951381	0.951091	0.950828	0.95059	0.950374	0.95018	0.950003	0.949844	0.949699	0.949567	0.949447	0.949337	0.949237	0.949145	0.949061	0.948983	0.948912	0.948846	0.948784	0.948727	0.948674	0.948625	0.948578	0.948535
																				0.953684	0.953193	0.95274	0.952322	0.951939	0.951589	0.951271	0.950983	0.950721	0.950485	0.950271	0.950077	0.949902	0.949744	0.9496	0.949469	0.949349	0.94924	0.949141	0.949049	0.948965	0.948888	0.948816	0.94875	0.948688	0.948631	0.948578	0.948528	0.948481	0.948437
																				0.953557	0.953068	0.952616	0.9522	0.951818	0.95147	0.951154	0.950867	0.950608	0.950373	0.95016	0.949968	0.949794	0.949637	0.949494	0.949363	0.949245	0.949136	0.949037	0.948946	0.948862	0.948784	0.948713	0.948646	0.948584	0.948527	0.948473	0.948423	0.948376	0.948331
																				0.953421	0.952934	0.952483	0.952069	0.95169	0.951344	0.951029	0.950744	0.950486	0.950253	0.950042	0.949851	0.949678	0.949522	0.949379	0.94925	0.949132	0.949024	0.948924	0.948833	0.94875	0.948672	0.9486	0.948533	0.948471	0.948413	0.948359	0.948308	0.94826	0.948215
																				0.953275	0.95279	0.952342	0.951929	0.951552	0.951208	0.950895	0.950612	0.950356	0.950124	0.949915	0.949725	0.949553	0.949398	0.949256	0.949127	0.949009	0.948901	0.948803	0.948711	0.948627	0.948549	0.948477	0.94841	0.948348	0.948289	0.948234	0.948183	0.948134	0.948089
																				0.953119	0.952636	0.952189	0.951779	0.951404	0.951062	0.950751	0.95047	0.950216	0.949985	0.949777	0.949589	0.949418	0.949263	0.949123	0.948994	0.948877	0.948769	0.94867	0.948578	0.948494	0.948416	0.948343	0.948275	0.948212	0.948153	0.948097	0.948045	0.947995	0.947949
																				0.952951	0.95247	0.952026	0.951618	0.951245	0.950905	0.950597	0.950317	0.950064	0.949836	0.949629	0.949442	0.949272	0.949118	0.948977	0.948849	0.948732	0.948624	0.948524	0.948433	0.948348	0.948269	0.948196	0.948127	0.948063	0.948003	0.947946	0.947893	0.947842	0.947795
																				0.95277	0.952291	0.951849	0.951444	0.951073	0.950736	0.950429	0.950152	0.949901	0.949673	0.949468	0.949282	0.949113	0.948959	0.948819	0.94869	0.948573	0.948465	0.948365	0.948273	0.948187	0.948107	0.948033	0.947963	0.947898	0.947837	0.947779	0.947725	0.947673	0.947624
																				0.952574	0.952098	0.951659	0.951256	0.950887	0.950552	0.950248	0.949972	0.949722	0.949497	0.949292	0.949107	0.948938	0.948785	0.948644	0.948516	0.948398	0.948289	0.948189	0.948095	0.948009	0.947928	0.947852	0.947782	0.947715	0.947652	0.947593	0.947537	0.947484	0.947434
																				0.952361	0.951888	0.951451	0.951051	0.950685	0.950352	0.95005	0.949776	0.949528	0.949303	0.949099	0.948914	0.948746	0.948592	0.948452	0.948323	0.948204	0.948095	0.947993	0.947899	0.947811	0.947728	0.947651	0.947579	0.947511	0.947447	0.947386	0.947328	0.947274	0.947222
																				0.952129	0.951659	0.951225	0.950828	0.950464	0.950133	0.949833	0.949561	0.949314	0.94909	0.948887	0.948702	0.948534	0.94838	0.948238	0.948109	0.947989	0.947878	0.947775	0.947679	0.947589	0.947505	0.947426	0.947352	0.947282	0.947216	0.947153	0.947094	0.947037	0.946984
																				0.951875	0.951408	0.950977	0.950583	0.950222	0.949893	0.949594	0.949323	0.949077	0.948854	0.948651	0.948466	0.948297	0.948142	0.948	0.947869	0.947747	0.947634	0.947529	0.947431	0.94734	0.947253	0.947172	0.947096	0.947024	0.946955	0.94689	0.946829	0.94677	0.946715
																				0.951596	0.951132	0.950704	0.950312	0.949953	0.949627	0.949329	0.949059	0.948814	0.948591	0.948387	0.948202	0.948031	0.947875	0.947731	0.947598	0.947474	0.947359	0.947252	0.947151	0.947057	0.946968	0.946884	0.946805	0.94673	0.946659	0.946592	0.946528	0.946467	0.946409
																				0.951286	0.950825	0.950401	0.950011	0.949655	0.949329	0.949033	0.948764	0.948518	0.948294	0.94809	0.947903	0.947731	0.947572	0.947426	0.94729	0.947164	0.947046	0.946935	0.946832	0.946734	0.946642	0.946555	0.946473	0.946395	0.946321	0.94625	0.946183	0.94612	0.946059
																				0.95094	0.950483	0.950061	0.949674	0.949319	0.948995	0.948699	0.948429	0.948183	0.947958	0.947751	0.947562	0.947387	0.947226	0.947076	0.946937	0.946807	0.946685	0.946571	0.946463	0.946362	0.946266	0.946175	0.946089	0.946008	0.94593	0.945856	0.945786	0.945719	0.945655
																				0.95055	0.950096	0.949677	0.949291	0.948937	0.948613	0.948317	0.948046	0.947798	0.947571	0.947362	0.947169	0.94699	0.946825	0.946671	0.946527	0.946392	0.946266	0.946147	0.946035	0.945928	0.945828	0.945733	0.945642	0.945556	0.945475	0.945397	0.945322	0.945251	0.945184
																				0.950105	0.949654	0.949237	0.948852	0.948498	0.948174	0.947876	0.947602	0.947351	0.94712	0.946906	0.946708	0.946525	0.946354	0.946194	0.946045	0.945904	0.945772	0.945647	0.945529	0.945417	0.945311	0.945211	0.945115	0.945024	0.944937	0.944854	0.944776	0.9447	0.944628
																				0.949591	0.949141	0.948725	0.94834	0.947984	0.947657	0.947356	0.947078	0.946822	0.946585	0.946365	0.946161	0.94597	0.945792	0.945625	0.945468	0.94532	0.945181	0.945049	0.944923	0.944805	0.944692	0.944585	0.944483	0.944386	0.944293	0.944205	0.944121	0.94404	0.943964
																				0.948982	0.948533	0.948115	0.947728	0.947369	0.947037	0.94673	0.946445	0.946181	0.945936	0.945708	0.945494	0.945295	0.945107	0.944931	0.944764	0.944607	0.944458	0.944317	0.944183	0.944056	0.943935	0.94382	0.94371	0.943606	0.943506	0.943411	0.94332	0.943234	0.943151
																				0.948241	0.94779	0.947368	0.946975	0.946609	0.946269	0.945953	0.945658	0.945383	0.945126	0.944885	0.944659	0.944447	0.944247	0.944057	0.943879	0.943709	0.943549	0.943396	0.943251	0.943113	0.942982	0.942857	0.942738	0.942625	0.942516	0.942413	0.942315	0.942221	0.942131
																				0.947298	0.94684	0.946409	0.946005	0.945627	0.945273	0.944941	0.94463	0.944339	0.944065	0.943807	0.943563	0.943333	0.943116	0.94291	0.942714	0.942529	0.942353	0.942185	0.942026	0.941874	0.94173	0.941592	0.941461	0.941336	0.941217	0.941104	0.940996	0.940892	0.940794
																				0.945994	0.945519	0.94507	0.944645	0.944245	0.943868	0.943511	0.943175	0.942857	0.942557	0.942273	0.942003	0.941748	0.941505	0.941275	0.941056	0.940848	0.94065	0.940462	0.940282	0.940111	0.939949	0.939794	0.939647	0.939506	0.939372	0.939245	0.939123	0.939008	0.938897
																				0.943727	0.943211	0.942719	0.942251	0.941804	0.941379	0.940975	0.940591	0.940225	0.939877	0.939545	0.93923	0.938929	0.938643	0.938371	0.938112	0.937865	0.93763	0.937406	0.937193	0.936991	0.936798	0.936614	0.936439	0.936273	0.936114	0.935964	0.93582	0.935683	0.935553
[truncated: 131 more columns]
