# Supplementary material for: The System’s Point of View applied to Dielectrophoresis in Plate Capacitor and Pointed-versus-Pointed Electrode Chambers
Source: Preprints.org preprint supplement (doi:10.20944/preprints202302.0190.v1), 2023-02-10
Supplement: Supplementary file 3 [file Table 3.xlsx]

## Sheet: Pointed vs. Pointed_1-in-0.1_co
Basic Resistance	Basic Conductance	Mean Resistance	Mean Conductance	k		a_X	a_y	a_Resistance in Route	a_Conductance along trajectory	a_Trajectory length	a_Delta Cond	a_Step width along trajectory	a_Mid-distance	a_norm. Force (Delta Cond./basic/diSTep)		b_X	b_Y	b_Resistance in Routh	b_Conductance along trajectory	b_Trajectory length	b-Delta Cond	b_Step width along trajectory	b_Mid-distance	b_norm. Force (Delta Cond./basic/diSTep)		c_X	c_Y	c_Resistance in Routh	c_Conductance along trajectory	c_Trajectory length	c_Delta Cond	c_Step width along trajectory	c_Mid-distance	c_norm. Force (Delta Cond./basic/diSTep)		d_X	d_Y	d_Resistance in Routh	d_Conductance along trajectory	d_Trajectory length	d_Delta Cond	d_Step width along trajectory	d_Mid-distance	d_norm. Force (Delta Cond./basic/diSTep)		e_X	e_Y	e_Resistance in Routh	e_Conductance along trajectory
47.2698	0.0211551	46.4875	0.0215211	0.211551		-0.251256	0.40201	47.0543	0.021252	0	3.46872e-07	0.000532539	0.00026627	0.0307897		0	0.40201	46.9526	0.0212981	0	2.36199e-07	0.00045683	0.000228415	0.0244406		0.0100503	0.40201	46.9528	0.021298	0	2.36398e-07	0.00045703	0.000228515	0.0244505		0.40201	0.40201	47.1686	0.0212005	0	3.1959e-07	0.00054277	0.000271385	0.0278334		-0.0100503	0	46.5753	0.0214706
						-0.250983	0.401553	47.0535	0.0212524	0.000532539	3.46872e-07	0.000532306	0.000798692	0.0308032		0	0.401553	46.9521	0.0212983	0.00045683	2.36199e-07	0.00045683	0.000685244	0.0244406		0.0100367	0.401553	46.9522	0.0212982	0.00045703	2.36398e-07	0.00045703	0.000685545	0.0244505		0.401717	0.401553	47.1679	0.0212009	0.00054277	3.1959e-07	0.000542642	0.000814091	0.0278399		-0.0105071	0	46.5753	0.0214706
						-0.250709	0.401096	47.0527	0.0212527	0.00106485	3.46722e-07	0.000532075	0.00133088	0.0308032		0	0.401096	46.9516	0.0212986	0.000913659	2.36199e-07	0.00045683	0.00114207	0.0244406		0.0100232	0.401096	46.9517	0.0212985	0.00091406	2.36398e-07	0.000457029	0.00114257	0.0244505		0.401424	0.401096	47.1672	0.0212012	0.00108541	3.19515e-07	0.000542514	0.00135667	0.0278399		-0.0109639	0	46.5752	0.0214707
						-0.250437	0.40064	47.052	0.0212531	0.00159692	3.46572e-07	0.000531844	0.00186284	0.0308033		0	0.40064	46.951	0.0212988	0.00137049	2.36199e-07	0.00045683	0.0015989	0.0244406		0.0100097	0.40064	46.9512	0.0212987	0.00137109	2.36398e-07	0.000457029	0.0015996	0.0244505		0.401131	0.40064	47.1665	0.0212015	0.00162793	3.19439e-07	0.000542386	0.00189912	0.0278399		-0.0114207	0	46.5751	0.0214707
						-0.250164	0.400183	47.0512	0.0212534	0.00212876	3.46423e-07	0.000531615	0.00239457	0.0308033		0	0.400183	46.9505	0.021299	0.00182732	2.36199e-07	0.00045683	0.00205573	0.0244406		0.00999621	0.400183	46.9507	0.0212989	0.00182812	2.36398e-07	0.000457028	0.00205663	0.0244505		0.400839	0.400183	47.1658	0.0212018	0.00217031	3.19364e-07	0.000542258	0.00244144	0.0278399		-0.0118776	0	46.5751	0.0214707
						-0.249892	0.399726	47.0504	0.0212538	0.00266038	3.46275e-07	0.000531388	0.00292607	0.0308033		0	0.399726	46.95	0.0212993	0.00228415	2.36199e-07	0.00045683	0.00251256	0.0244406		0.00998274	0.399726	46.9502	0.0212992	0.00228515	2.36398e-07	0.000457028	0.00251366	0.0244506		0.400547	0.399726	47.1651	0.0212021	0.00271257	3.19288e-07	0.00054213	0.00298364	0.0278399		-0.0123344	0	46.575	0.0214707
						-0.249621	0.399269	47.0497	0.0212541	0.00319177	3.46127e-07	0.000531161	0.00345735	0.0308033		0	0.399269	46.9495	0.0212995	0.00274098	2.36199e-07	0.00045683	0.00296939	0.0244406		0.00996929	0.399269	46.9496	0.0212994	0.00274217	2.36397e-07	0.000457027	0.00297069	0.0244506		0.400255	0.399269	47.1643	0.0212025	0.0032547	3.20774e-07	0.000542002	0.0035257	0.0279761		-0.0127912	0	46.575	0.0214708
						-0.24935	0.398812	47.0489	0.0212545	0.00372293	3.4598e-07	0.000530936	0.0039884	0.0308033		0	0.398812	46.9489	0.0212997	0.00319781	2.36199e-07	0.00045683	0.00342622	0.0244406		0.00995586	0.398812	46.9491	0.0212997	0.0031992	2.36397e-07	0.000457027	0.00342771	0.0244506		0.399963	0.398812	47.1636	0.0212028	0.0037967	3.24464e-07	0.000541874	0.00406764	0.0283045		-0.0132481	0	46.5749	0.0214708
						-0.249079	0.398355	47.0481	0.0212548	0.00425386	3.45833e-07	0.000530712	0.00451922	0.0308032		0	0.398355	46.9484	0.0213	0.00365464	2.36199e-07	0.00045683	0.00388305	0.0244406		0.00994245	0.398355	46.9486	0.0212999	0.00365623	2.36397e-07	0.000457026	0.00388474	0.0244506		0.399672	0.398355	47.1629	0.0212031	0.00433858	3.24386e-07	0.000541745	0.00460945	0.0283045		-0.0137049	0	46.5749	0.0214708
						-0.248809	0.397899	47.0474	0.0212552	0.00478458	3.45688e-07	0.00053049	0.00504982	0.0308031		0	0.397899	46.9479	0.0213002	0.00411147	2.36199e-07	0.00045683	0.00433988	0.0244406		0.00992905	0.397899	46.9481	0.0213001	0.00411325	2.36397e-07	0.000457026	0.00434177	0.0244506		0.399381	0.397899	47.1622	0.0212034	0.00488032	3.24308e-07	0.000541617	0.00515113	0.0283044		-0.0141617	0	46.5748	0.0214708
						-0.24854	0.397442	47.0466	0.0212555	0.00531507	3.45543e-07	0.000530268	0.0055802	0.0308031		0	0.397442	46.9474	0.0213004	0.0045683	2.36199e-07	0.00045683	0.00479671	0.0244406		0.00991567	0.397442	46.9476	0.0213004	0.00457028	2.36386e-07	0.000457025	0.00479879	0.0244495		0.39909	0.397442	47.1615	0.0212038	0.00542194	3.24231e-07	0.000541489	0.00569268	0.0283043		-0.0146185	0	46.5748	0.0214709
						-0.24827	0.396985	47.0459	0.0212559	0.00584533	3.50022e-07	0.000530048	0.00611036	0.0312154		0	0.396985	46.9469	0.0213007	0.00502513	2.32924e-07	0.00045683	0.00525354	0.0241017		0.0099023	0.396985	46.947	0.0213006	0.0050273	2.33135e-07	0.000457025	0.00525582	0.0241133		0.398799	0.396985	47.1607	0.0212041	0.00596343	3.32107e-07	0.00054136	0.00623411	0.0289988		-0.0150754	0	46.5747	0.0214709
						-0.248002	0.396528	47.0451	0.0212562	0.00637538	3.49777e-07	0.000529675	0.00664022	0.0312155		0	0.396528	46.9464	0.0213009	0.00548196	2.32924e-07	0.00045683	0.00571037	0.0241017		0.00988896	0.396528	46.9465	0.0213008	0.00548433	2.33135e-07	0.000457024	0.00571284	0.0241133		0.398509	0.396528	47.16	0.0212044	0.00650479	3.31812e-07	0.000540873	0.00677522	0.0289991		-0.0155322	0	46.5746	0.0214709
						-0.247733	0.396071	47.0443	0.0212566	0.00690506	3.49533e-07	0.000529305	0.00716971	0.0312155		0	0.396071	46.9458	0.0213011	0.00593878	2.32924e-07	0.00045683	0.0061672	0.0241017		0.00987562	0.396071	46.946	0.0213011	0.00594135	2.33135e-07	0.000457024	0.00616986	0.0241133		0.398219	0.396071	47.1593	0.0212047	0.00704566	3.34515e-07	0.000540392	0.00731586	0.0292614		-0.015989	0	46.5745	0.021471
						-0.247466	0.395614	47.0435	0.0212569	0.00743436	3.49291e-07	0.000528938	0.00769883	0.0312156		0	0.395614	46.9453	0.0213014	0.00639561	2.32924e-07	0.00045683	0.00662403	0.0241017		0.0098623	0.395614	46.9455	0.0213013	0.00639838	2.33135e-07	0.000457023	0.00662689	0.0241133		0.39793	0.395614	47.1585	0.0212051	0.00758605	3.36477e-07	0.000539916	0.00785601	0.0294589		-0.0164459	0	46.5745	0.021471
						-0.2472	0.395158	47.0428	0.0212573	0.0079633	3.49051e-07	0.000528575	0.00822759	0.0312155		0	0.395158	46.9448	0.0213016	0.00685244	2.32924e-07	0.00045683	0.00708086	0.0241017		0.00984899	0.395158	46.945	0.0213015	0.0068554	2.33135e-07	0.000457023	0.00708391	0.0241133		0.397643	0.395158	47.1578	0.0212054	0.00812597	3.36183e-07	0.000539446	0.00839569	0.0294589		-0.0169027	0	46.5744	0.021471
						-0.246934	0.394701	47.042	0.0212576	0.00849187	3.48813e-07	0.000528215	0.00875598	0.0312154		0	0.394701	46.9443	0.0213018	0.00730927	2.32924e-07	0.00045683	0.00753769	0.0241017		0.00983569	0.394701	46.9445	0.0213018	0.00731242	2.33134e-07	0.000457023	0.00754093	0.0241133		0.397356	0.394701	47.157	0.0212057	0.00866541	3.35892e-07	0.00053898	0.0089349	0.0294588		-0.0173595	0	46.5743	0.0214711
						-0.246668	0.394244	47.0412	0.021258	0.00902009	3.48576e-07	0.000527859	0.00928402	0.0312153		0	0.394244	46.9438	0.0213021	0.0077661	2.32924e-07	0.00045683	0.00799452	0.0241017		0.0098224	0.394244	46.9439	0.021302	0.00776945	2.33134e-07	0.000457022	0.00799796	0.0241133		0.39707	0.394244	47.1563	0.0212061	0.00920439	3.34641e-07	0.00053852	0.00947365	0.0293741		-0.0178164	0	46.5742	0.0214711
						-0.246404	0.393787	47.0404	0.0212583	0.00954795	3.47862e-07	0.000527506	0.0098117	0.0311723		0	0.393787	46.9433	0.0213023	0.00822293	2.32924e-07	0.00045683	0.00845135	0.0241017		0.00980913	0.393787	46.9434	0.0213022	0.00822647	2.33134e-07	0.000457022	0.00845498	0.0241133		0.396784	0.393787	47.1555	0.0212064	0.00974291	3.33966e-07	0.000538088	0.010012	0.0293384		-0.0182732	0	46.5742	0.0214711
						-0.24614	0.39333	47.0397	0.0212587	0.0100755	3.46721e-07	0.000527154	0.010339	0.0310907		0	0.39333	46.9428	0.0213025	0.00867976	2.32924e-07	0.00045683	0.00890818	0.0241017		0.00979586	0.39333	46.9429	0.0213025	0.00868349	2.33134e-07	0.000457022	0.008912	0.0241133		0.3965	0.39333	47.1548	0.0212068	0.010281	3.33705e-07	0.000537668	0.0105498	0.0293384		-0.01873	0	46.5741	0.0214712
						-0.245877	0.392873	47.0389	0.021259	0.0106026	3.4649e-07	0.000526802	0.010866	0.0310907		0	0.392873	46.9422	0.0213028	0.00913659	2.32924e-07	0.00045683	0.00936501	0.0241017		0.00978261	0.392873	46.9424	0.0213027	0.00914051	2.33134e-07	0.000457021	0.00936902	0.0241133		0.396217	0.392873	47.1541	0.0212071	0.0108187	3.37361e-07	0.000537252	0.0110873	0.0296828		-0.0191868	0	46.574	0.0214712
						-0.245615	0.392417	47.0381	0.0212593	0.0111294	3.46261e-07	0.000526454	0.0113926	0.0310907		0	0.392417	46.9417	0.021303	0.00959342	2.32924e-07	0.00045683	0.00982184	0.0241017		0.00976937	0.392417	46.9419	0.0213029	0.00959753	2.33105e-07	0.000457021	0.00982604	0.0241104		0.395934	0.392417	47.1533	0.0212074	0.0113559	3.38057e-07	0.000536839	0.0116243	0.0297669		-0.0196437	0	46.5739	0.0214712
						-0.245353	0.39196	47.0374	0.0212597	0.0116559	3.50351e-07	0.000526109	0.0119189	0.0314786		0	0.39196	46.9412	0.0213032	0.0100503	2.29787e-07	0.00045683	0.0102787	0.0237771		0.00975614	0.39196	46.9414	0.0213032	0.0100546	2.3001e-07	0.000457021	0.0102831	0.0237902		0.395652	0.39196	47.1525	0.0212078	0.0118928	3.46586e-07	0.000536429	0.012161	0.0305413		-0.0201005	0	46.5738	0.0214713
						-0.245092	0.391503	47.0366	0.02126	0.012182	3.501e-07	0.000525729	0.0124448	0.0314788		0	0.391503	46.9407	0.0213035	0.0105071	2.29787e-07	0.00045683	0.0107355	0.0237771		0.00974292	0.391503	46.9409	0.0213034	0.0105116	2.3001e-07	0.00045702	0.0107401	0.0237902		0.395371	0.391503	47.1518	0.0212081	0.0124292	3.46302e-07	0.000535984	0.0126972	0.0305416		-0.0205573	0	46.5737	0.0214713
						-0.244832	0.391046	47.0358	0.0212604	0.0127077	3.4985e-07	0.000525353	0.0129704	0.0314789		0	0.391046	46.9402	0.0213037	0.0109639	2.29787e-07	0.00045683	0.0111923	0.0237771		0.00972971	0.391046	46.9404	0.0213036	0.0109686	2.3001e-07	0.00045702	0.0111971	0.0237903		0.39509	0.391046	47.151	0.0212085	0.0129652	3.4602e-07	0.000535542	0.0132329	0.0305418		-0.0210142	0	46.5736	0.0214714
						-0.244573	0.390589	47.035	0.0212607	0.0132331	3.49603e-07	0.00052498	0.0134955	0.031479		0	0.390589	46.9397	0.0213039	0.0114207	2.29787e-07	0.00045683	0.0116492	0.0237771		0.00971653	0.390589	46.9399	0.0213039	0.0114256	2.3001e-07	0.00045702	0.0116541	0.0237903		0.394811	0.390589	47.1502	0.0212088	0.0135007	3.45739e-07	0.000535104	0.0137683	0.0305421		-0.021471	0	46.5735	0.0214714
						-0.244314	0.390132	47.0343	0.0212611	0.013758	3.49607e-07	0.00052461	0.0140203	0.0315015		0	0.390132	46.9392	0.0213042	0.0118776	2.29787e-07	0.00045683	0.012106	0.0237771		0.00970335	0.390132	46.9394	0.0213041	0.0118826	2.30009e-07	0.000457019	0.0121111	0.0237903		0.394532	0.390132	47.1495	0.0212091	0.0140358	3.4546e-07	0.00053467	0.0143032	0.0305422		-0.0219278	0	46.5734	0.0214715
						-0.244056	0.389676	47.0335	0.0212614	0.0142826	3.4957e-07	0.000524244	0.0145448	0.0315202		0	0.389676	46.9387	0.0213044	0.0123344	2.29787e-07	0.00045683	0.0125628	0.0237771		0.00969019	0.389676	46.9388	0.0213043	0.0123397	2.30009e-07	0.000457019	0.0125682	0.0237903		0.394254	0.389676	47.1487	0.0212095	0.0145705	3.49861e-07	0.000534239	0.0148376	0.0309562		-0.0223847	0	46.5733	0.0214715
						-0.243799	0.389219	47.0327	0.0212618	0.0148069	3.49329e-07	0.000523882	0.0150688	0.0315202		0	0.389219	46.9382	0.0213046	0.0127912	2.29787e-07	0.00045683	0.0130196	0.0237771		0.00967705	0.389219	46.9383	0.0213045	0.0127967	2.30009e-07	0.000457018	0.0130252	0.0237903		0.393977	0.389219	47.1479	0.0212098	0.0151047	3.49648e-07	0.000533812	0.0153716	0.0309621		-0.0228415	0	46.5732	0.0214716
						-0.243542	0.388762	47.032	0.0212621	0.0153308	3.4909e-07	0.000523522	0.0155925	0.0315203		0	0.388762	46.9377	0.0213048	0.0132481	2.29787e-07	0.00045683	0.0134765	0.0237771		0.00966392	0.388762	46.9378	0.0213048	0.0132537	2.30009e-07	0.000457018	0.0134822	0.0237903		0.393701	0.388762	47.1471	0.0212102	0.0156385	3.49369e-07	0.000533389	0.0159052	0.030962		-0.0232983	0	46.5731	0.0214716
						-0.243287	0.388305	47.0312	0.0212625	0.0158543	3.48852e-07	0.000523166	0.0161159	0.0315203		0	0.388305	46.9372	0.0213051	0.0137049	2.29787e-07	0.00045683	0.0139333	0.0237771		0.00965081	0.388305	46.9373	0.021305	0.0137107	2.30009e-07	0.000457017	0.0139392	0.0237903		0.393426	0.388305	47.1464	0.0212105	0.0161719	3.49092e-07	0.000532969	0.0164384	0.0309618		-0.0237551	0	46.573	0.0214717
						-0.243032	0.387848	47.0304	0.0212628	0.0163775	3.48616e-07	0.000522813	0.0166389	0.0315202		0	0.387848	46.9367	0.0213053	0.0141617	2.29787e-07	0.00045683	0.0143901	0.0237771		0.00963771	0.387848	46.9368	0.0213052	0.0141677	2.30009e-07	0.000457017	0.0143962	0.0237903		0.393151	0.387848	47.1456	0.0212109	0.0167049	3.48816e-07	0.000532553	0.0169712	0.0309615		-0.024212	0	46.5729	0.0214717
						-0.242777	0.387392	47.0296	0.0212632	0.0169003	3.48382e-07	0.000522463	0.0171615	0.0315201		0	0.387392	46.9362	0.0213055	0.0146185	2.29787e-07	0.00045683	0.014847	0.0237771		0.00962462	0.387392	46.9363	0.0213055	0.0146247	2.29955e-07	0.000457017	0.0148533	0.0237848		0.392878	0.387392	47.1448	0.0212112	0.0172375	3.48542e-07	0.00053214	0.0175035	0.0309612		-0.0246688	0	46.5728	0.0214718
						-0.242524	0.386935	47.0289	0.0212635	0.0174227	3.52487e-07	0.000522116	0.0176838	0.0319128		0	0.386935	46.9357	0.0213058	0.0150754	2.2682e-07	0.00045683	0.0153038	0.0234701		0.00961155	0.386935	46.9358	0.0213057	0.0150818	2.27055e-07	0.000457016	0.0153103	0.0234849		0.392605	0.386935	47.144	0.0212116	0.0177696	3.58309e-07	0.00053173	0.0180355	0.0318534		-0.0251256	0	46.5727	0.0214718
						-0.242271	0.386478	47.0281	0.0212639	0.0179449	3.52231e-07	0.000521735	0.0182057	0.0319128		0	0.386478	46.9352	0.021306	0.0155322	2.2682e-07	0.00045683	0.0157606	0.0234701		0.0095985	0.386478	46.9353	0.0213059	0.0155388	2.27055e-07	0.000457016	0.0157673	0.0234849		0.392333	0.386478	47.1432	0.0212119	0.0183013	3.6209e-07	0.000531285	0.018567	0.0322164		-0.0255825	0	46.5726	0.0214719
						-0.242019	0.386021	47.0273	0.0212642	0.0184666	3.51977e-07	0.000521358	0.0187273	0.0319128		0	0.386021	46.9347	0.0213062	0.015989	2.2682e-07	0.00045683	0.0162175	0.0234701		0.00958546	0.386021	46.9348	0.0213061	0.0159958	2.27055e-07	0.000457015	0.0162243	0.0234849		0.392061	0.386021	47.1424	0.0212123	0.0188326	3.6093e-07	0.000530845	0.019098	0.0321398		-0.0260393	0	46.5725	0.0214719
						-0.241768	0.385564	47.0265	0.0212646	0.0189879	3.51724e-07	0.000520984	0.0192484	0.0319128		0	0.385564	46.9342	0.0213064	0.0164459	2.2682e-07	0.00045683	0.0166743	0.0234701		0.00957245	0.385564	46.9343	0.0213064	0.0164528	2.27055e-07	0.000457015	0.0166813	0.0234849		0.391791	0.385564	47.1416	0.0212127	0.0193635	3.60121e-07	0.000530412	0.0196287	0.0320939		-0.0264961	0	46.5723	0.021472
						-0.241517	0.385107	47.0258	0.0212649	0.0195089	3.51473e-07	0.000520614	0.0197692	0.0319127		0	0.385107	46.9337	0.0213067	0.0169027	2.2682e-07	0.00045683	0.0171311	0.0234701		0.00955945	0.385107	46.9338	0.0213066	0.0169098	2.27054e-07	0.000457014	0.0171383	0.0234849		0.391522	0.385107	47.1408	0.021213	0.0198939	3.59833e-07	0.000529984	0.0201589	0.0320941		-0.0269529	0	46.5722	0.021472
						-0.241268	0.384651	47.025	0.0212653	0.0200295	3.49911e-07	0.000520247	0.0202897	0.0317933		0	0.384651	46.9332	0.0213069	0.0173595	2.2682e-07	0.00045683	0.0175879	0.0234701		0.00954647	0.384651	46.9333	0.0213068	0.0173668	2.27054e-07	0.000457013	0.0175953	0.0234849		0.391253	0.384651	47.14	0.0212134	0.0204238	3.59547e-07	0.00052956	0.0206886	0.0320943		-0.0274098	0	46.5721	0.0214721
						-0.241019	0.384194	47.0242	0.0212656	0.0205498	3.49234e-07	0.00051988	0.0208097	0.0317542		0	0.384194	46.9327	0.0213071	0.0178164	2.2682e-07	0.00045683	0.0180448	0.0234701		0.0095335	0.384194	46.9328	0.0213071	0.0178238	2.27054e-07	0.000457013	0.0180524	0.0234849		0.390985	0.384194	47.1392	0.0212137	0.0209534	3.59263e-07	0.00052914	0.021218	0.0320944		-0.0278666	0	46.572	0.0214721
						-0.240771	0.383737	47.0234	0.021266	0.0210697	3.4899e-07	0.000519515	0.0213294	0.0317543		0	0.383737	46.9322	0.0213074	0.0182732	2.2682e-07	0.00045683	0.0185016	0.0234701		0.00952056	0.383737	46.9323	0.0213073	0.0182809	2.27054e-07	0.000457012	0.0185094	0.0234849		0.390718	0.383737	47.1384	0.0212141	0.0214825	3.59777e-07	0.000528724	0.0217469	0.0321657		-0.0283234	0	46.5718	0.0214722
						-0.240523	0.38328	47.0227	0.0212663	0.0215892	3.48748e-07	0.000519154	0.0218488	0.0317544		0	0.38328	46.9317	0.0213076	0.01873	2.2682e-07	0.00045683	0.0189584	0.0234701		0.00950763	0.38328	46.9318	0.0213075	0.0187379	2.27054e-07	0.000457012	0.0189664	0.0234849		0.390452	0.38328	47.1376	0.0212145	0.0220113	3.62887e-07	0.000528311	0.0222754	0.0324691		-0.0287803	0	46.5717	0.0214723
						-0.240277	0.382823	47.0219	0.0212667	0.0221083	3.48508e-07	0.000518796	0.0223677	0.0317544		0	0.382823	46.9312	0.0213078	0.0191868	2.2682e-07	0.00045683	0.0194153	0.0234701		0.00949473	0.382823	46.9313	0.0213077	0.0191949	2.27037e-07	0.000457011	0.0194234	0.0234832		0.390186	0.382823	47.1368	0.0212148	0.0225396	3.62603e-07	0.000527901	0.0228035	0.0324689		-0.0292371	0	46.5716	0.0214723
						-0.240031	0.382366	47.0211	0.021267	0.0226271	3.48269e-07	0.000518441	0.0228864	0.0317544		0	0.382366	46.9307	0.021308	0.0196437	2.2682e-07	0.00045683	0.0198721	0.0234701		0.00948184	0.382366	46.9308	0.021308	0.0196519	2.26984e-07	0.000457011	0.0198804	0.0234778		0.389922	0.382366	47.136	0.0212152	0.0230675	3.62321e-07	0.000527495	0.0233312	0.0324686		-0.0296939	0	46.5715	0.0214724
						-0.239786	0.38191	47.0203	0.0212674	0.0231456	3.52076e-07	0.000518089	0.0234046	0.0321233		0	0.38191	46.9302	0.0213083	0.0201005	2.24087e-07	0.00045683	0.0203289	0.0231873		0.00946897	0.38191	46.9303	0.0213082	0.0201089	2.24333e-07	0.00045701	0.0203374	0.0232036		0.389658	0.38191	47.1352	0.0212156	0.023595	3.72484e-07	0.000527092	0.0238585	0.0334048		-0.0301508	0	46.5714	0.0214724
						-0.239541	0.381453	47.0196	0.0212677	0.0236637	3.51816e-07	0.000517704	0.0239225	0.0321234		0	0.381453	46.9297	0.0213085	0.0205573	2.24087e-07	0.00045683	0.0207857	0.0231873		0.00945611	0.381453	46.9298	0.0213084	0.0205659	2.24333e-07	0.00045701	0.0207944	0.0232036		0.389395	0.381453	47.1344	0.0212159	0.0241221	3.72179e-07	0.000526656	0.0243854	0.0334051		-0.0306076	0	46.5712	0.0214725
						-0.239298	0.380996	47.0188	0.0212681	0.0241814	3.51557e-07	0.000517322	0.02444	0.0321235		0	0.380996	46.9292	0.0213087	0.0210142	2.24087e-07	0.00045683	0.0212426	0.0231873		0.00944328	0.380996	46.9293	0.0213086	0.0210229	2.24333e-07	0.000457009	0.0212514	0.0232036		0.389133	0.380996	47.1336	0.0212163	0.0246487	3.71877e-07	0.000526223	0.0249118	0.0334054		-0.0310644	0	46.5711	0.0214726
						-0.239055	0.380539	47.018	0.0212684	0.0246987	3.513e-07	0.000516944	0.0249572	0.0321235		0	0.380539	46.9287	0.0213089	0.021471	2.24087e-07	0.00045683	0.0216994	0.0231873		0.00943047	0.380539	46.9288	0.0213089	0.0214799	2.24333e-07	0.000457009	0.0217084	0.0232037		0.388872	0.380539	47.1327	0.0212167	0.025175	3.72418e-07	0.000525795	0.0254378	0.0334813		-0.0315212	0	46.5709	0.0214726
						-0.238813	0.380082	47.0172	0.0212688	0.0252156	3.51045e-07	0.000516569	0.0254739	0.0321234		0	0.380082	46.9282	0.0213092	0.0219278	2.24087e-07	0.00045683	0.0221562	0.0231873		0.00941769	0.380082	46.9283	0.0213091	0.0219369	2.24333e-07	0.000457008	0.0221654	0.0232037		0.388612	0.380082	47.1319	0.021217	0.0257007	3.7529e-07	0.00052537	0.0259634	0.0337668		-0.0319781	0	46.5708	0.0214727
						-0.238572	0.379625	47.0165	0.0212691	0.0257322	3.50791e-07	0.000516198	0.0259903	0.0321233		0	0.379625	46.9277	0.0213094	0.0223847	2.24087e-07	0.00045683	0.0226131	0.0231873		0.00940492	0.379625	46.9278	0.0213093	0.022394	2.24332e-07	0.000457007	0.0226225	0.0232037		0.388352	0.379625	47.1311	0.0212174	0.0262261	3.74988e-07	0.000524949	0.0264886	0.0337667		-0.0324349	0	46.5706	0.0214728
						-0.238331	0.379169	47.0157	0.0212695	0.0262484	3.50848e-07	0.00051583	0.0265063	0.0321515		0	0.379169	46.9272	0.0213096	0.0228415	2.24087e-07	0.00045683	0.0230699	0.0231873		0.00939218	0.379169	46.9273	0.0213095	0.022851	2.24332e-07	0.000457007	0.0230795	0.0232037		0.388094	0.379169	47.1303	0.0212178	0.0267511	3.74689e-07	0.000524532	0.0270133	0.0337666		-0.0328917	0	46.5705	0.0214728
						-0.238092	0.378712	47.0149	0.0212698	0.0267642	3.51094e-07	0.000515465	0.027022	0.0321968		0	0.378712	46.9267	0.0213098	0.0232983	2.24087e-07	0.00045683	0.0235267	0.0231873		0.00937946	0.378712	46.9268	0.0213098	0.023308	2.24332e-07	0.000457006	0.0235365	0.0232037		0.387836	0.378712	47.1294	0.0212182	0.0272756	3.74391e-07	0.000524118	0.0275377	0.0337664		-0.0333486	0	46.5703	0.0214729
						-0.237853	0.378255	47.0141	0.0212702	0.0272797	3.50848e-07	0.000515103	0.0275372	0.0321968		0	0.378255	46.9262	0.0213101	0.0237551	2.24087e-07	0.00045683	0.0239836	0.0231873		0.00936676	0.378255	46.9264	0.02131	0.023765	2.24332e-07	0.000457005	0.0239935	0.0232037		0.387579	0.378255	47.1286	0.0212185	0.0277997	3.74095e-07	0.000523708	0.0280616	0.0337661		-0.0338054	0	46.5702	0.021473
						-0.237615	0.377798	47.0134	0.0212705	0.0277948	3.50604e-07	0.000514744	0.0280522	0.0321968		0	0.377798	46.9257	0.0213103	0.024212	2.24087e-07	0.00045683	0.0244404	0.0231873		0.00935409	0.377798	46.9259	0.0213102	0.024222	2.24288e-07	0.000457005	0.0244505	0.0231992		0.387323	0.377798	47.1278	0.0212189	0.0283234	3.73801e-07	0.000523301	0.0285851	0.0337658		-0.0342622	0	46.57	0.021473
						-0.237378	0.377341	47.0126	0.0212709	0.0283095	3.50361e-07	0.000514389	0.0285667	0.0321967		0	0.377341	46.9252	0.0213105	0.0246688	2.24087e-07	0.00045683	0.0248972	0.0231873		0.00934144	0.377341	46.9254	0.0213104	0.024679	2.2425e-07	0.000457004	0.0249075	0.0231954		0.387068	0.377341	47.1269	0.0212193	0.0288467	3.73521e-07	0.000522898	0.0291082	0.0337665		-0.034719	0	46.5699	0.0214731
						-0.237142	0.376884	47.0118	0.0212713	0.0288239	3.54222e-07	0.000514037	0.029081	0.0325738		0	0.376884	46.9247	0.0213107	0.0251256	2.21663e-07	0.00045683	0.025354	0.0229365		0.0093288	0.376884	46.9249	0.0213107	0.025136	2.21921e-07	0.000457004	0.0253645	0.0229544		0.386813	0.376884	47.1261	0.0212197	0.0293696	3.86965e-07	0.000522501	0.0296309	0.0350085		-0.0351759	0	46.5697	0.0214732
						-0.236906	0.376428	47.011	0.0212716	0.029338	3.53957e-07	0.000513652	0.0295948	0.0325739		0	0.376428	46.9242	0.0213109	0.0255825	2.21663e-07	0.00045683	0.0258109	0.0229365		0.00931619	0.376428	46.9244	0.0213109	0.025593	2.2192e-07	0.000457003	0.0258215	0.0229544		0.38656	0.376428	47.1252	0.0212201	0.0298921	3.86654e-07	0.000522074	0.0301532	0.0350089		-0.0356327	0	46.5696	0.0214733
						-0.236671	0.375971	47.0102	0.021272	0.0298516	3.53694e-07	0.000513271	0.0301083	0.0325739		0	0.375971	46.9238	0.0213112	0.0260393	2.21663e-07	0.00045683	0.0262677	0.0229365		0.00930361	0.375971	46.9239	0.0213111	0.02605	2.2192e-07	0.000457002	0.0262785	0.0229544		0.386307	0.375971	47.1244	0.0212204	0.0304142	3.86345e-07	0.000521651	0.030675	0.0350093		-0.0360895	0	46.5694	0.0214733
						-0.236437	0.375514	47.0095	0.0212723	0.0303649	3.53433e-07	0.000512893	0.0306213	0.0325738		0	0.375514	46.9233	0.0213114	0.0264961	2.21663e-07	0.00045683	0.0267245	0.0229365		0.00929105	0.375514	46.9234	0.0213113	0.026507	2.2192e-07	0.000457001	0.0267355	0.0229544		0.386055	0.375514	47.1235	0.0212208	0.0309358	3.86038e-07	0.000521232	0.0311965	0.0350096		-0.0365464	0	46.5692	0.0214734
						-0.236204	0.375057	47.0087	0.0212727	0.0308778	3.51346e-07	0.000512519	0.031134	0.0324051		0	0.375057	46.9228	0.0213116	0.0269529	2.21663e-07	0.00045683	0.0271814	0.0229365		0.00927852	0.375057	46.9229	0.0213115	0.026964	2.21919e-07	0.000457001	0.0271925	0.0229544		0.385804	0.375057	47.1227	0.0212212	0.0314571	3.85733e-07	0.000520816	0.0317175	0.0350098		-0.0370032	0	46.569	0.0214735
						-0.235972	0.3746	47.0079	0.021273	0.0313903	3.50893e-07	0.000512145	0.0316464	0.0323869		0	0.3746	46.9223	0.0213118	0.0274098	2.21663e-07	0.00045683	0.0276382	0.0229365		0.00926602	0.3746	46.9224	0.0213118	0.027421	2.21919e-07	0.000457	0.0276495	0.0229544		0.385554	0.3746	47.1218	0.0212216	0.0319779	3.8543e-07	0.000520405	0.0322381	0.03501		-0.03746	0	46.5689	0.0214736
						-0.23574	0.374143	47.0071	0.0212734	0.0319024	3.50641e-07	0.000511774	0.0321583	0.0323872		0	0.374143	46.9218	0.0213121	0.0278666	2.21663e-07	0.00045683	0.028095	0.0229365		0.00925354	0.374143	46.9219	0.021312	0.027878	2.21919e-07	0.000456999	0.0281065	0.0229544		0.385305	0.374143	47.121	0.021222	0.0324983	3.85373e-07	0.000519997	0.0327583	0.0350323		-0.0379169	0	46.5687	0.0214737
						-0.235509	0.373687	47.0064	0.0212737	0.0324142	3.50391e-07	0.000511406	0.0326699	0.0323873		0	0.373687	46.9213	0.0213123	0.0283234	2.21663e-07	0.00045683	0.0285519	0.0229365		0.00924109	0.373687	46.9215	0.0213122	0.028335	2.21919e-07	0.000456999	0.0285635	0.0229544		0.385056	0.373687	47.1201	0.0212224	0.0330183	3.88194e-07	0.000519593	0.0332781	0.0353162		-0.0383737	0	46.5685	0.0214737
						-0.235279	0.37323	47.0056	0.0212741	0.0329256	3.50143e-07	0.000511042	0.0331811	0.0323875		0	0.37323	46.9208	0.0213125	0.0287803	2.21663e-07	0.00045683	0.0290087	0.0229365		0.00922866	0.37323	46.921	0.0213124	0.028792	2.21918e-07	0.000456998	0.0290205	0.0229545		0.384809	0.37323	47.1192	0.0212228	0.0335379	3.87893e-07	0.000519192	0.0337975	0.035316		-0.0388305	0	46.5684	0.0214738
						-0.23505	0.372773	47.0048	0.0212744	0.0334367	3.49896e-07	0.00051068	0.033692	0.0323875		0	0.372773	46.9203	0.0213127	0.0292371	2.21663e-07	0.00045683	0.0294655	0.0229365		0.00921626	0.372773	46.9205	0.0213127	0.029249	2.21841e-07	0.000456997	0.0294775	0.0229465		0.384562	0.372773	47.1184	0.0212231	0.0340571	3.87593e-07	0.000518795	0.0343165	0.0353157		-0.0392873	0	46.5682	0.0214739
						-0.234822	0.372316	47.004	0.0212748	0.0339473	3.4965e-07	0.000510322	0.0342025	0.0323875		0	0.372316	46.9198	0.0213129	0.0296939	2.21663e-07	0.00045683	0.0299223	0.0229365		0.00920389	0.372316	46.92	0.0213129	0.029706	2.21825e-07	0.000456996	0.0299345	0.0229449		0.384316	0.372316	47.1175	0.0212235	0.0345759	3.87295e-07	0.000518401	0.0348351	0.0353154		-0.0397442	0	46.568	0.021474
						-0.234595	0.371859	47.0033	0.0212751	0.0344577	3.53254e-07	0.000509967	0.0347127	0.0327441		0	0.371859	46.9194	0.0213132	0.0301508	2.19614e-07	0.00045683	0.0303792	0.0227245		0.00919154	0.371859	46.9195	0.0213131	0.030163	2.19881e-07	0.000456996	0.0303915	0.0227438		0.384071	0.371859	47.1167	0.0212239	0.0350943	3.99297e-07	0.000518011	0.0353533	0.0364372		-0.040201	0	46.5678	0.021474
						-0.234368	0.371402	47.0025	0.0212755	0.0349676	3.52988e-07	0.000509582	0.0352224	0.0327442		0	0.371402	46.9189	0.0213134	0.0306076	2.19614e-07	0.00045683	0.030836	0.0227245		0.00917922	0.371402	46.919	0.0213133	0.03062	2.19881e-07	0.000456995	0.0308485	0.0227438		0.383827	0.371402	47.1158	0.0212243	0.0356123	3.98977e-07	0.00051759	0.0358711	0.0364376		-0.0406578	0	46.5676	0.0214741
						-0.234142	0.370946	47.0017	0.0212758	0.0354772	3.52724e-07	0.000509199	0.0357318	0.0327442		0	0.370946	46.9184	0.0213136	0.0310644	2.19614e-07	0.00045683	0.0312928	0.0227245		0.00916692	0.370946	46.9185	0.0213135	0.031077	2.1988e-07	0.000456994	0.0313055	0.0227438		0.383584	0.370946	47.1149	0.0212247	0.0361299	3.98659e-07	0.000517172	0.0363885	0.036438		-0.0411147	0	46.5675	0.0214742
						-0.233917	0.370489	47.0009	0.0212762	0.0359864	3.52461e-07	0.00050882	0.0362408	0.0327442		0	0.370489	46.9179	0.0213138	0.0315212	2.19614e-07	0.00045683	0.0317497	0.0227245		0.00915466	0.370489	46.918	0.0213138	0.031534	2.1988e-07	0.000456993	0.0317625	0.0227438		0.383341	0.370489	47.114	0.0212251	0.036647	4.01202e-07	0.000516759	0.0369054	0.0366997		-0.0415715	0	46.5673	0.0214743
						-0.233693	0.370032	47.0001	0.0212765	0.0364952	3.522e-07	0.000508445	0.0367495	0.0327441		0	0.370032	46.9174	0.021314	0.0319781	2.19614e-07	0.00045683	0.0322065	0.0227245		0.00914243	0.370032	46.9176	0.021314	0.031991	2.1988e-07	0.000456993	0.0322195	0.0227438		0.3831	0.370032	47.1131	0.0212255	0.0371638	4.01158e-07	0.000516349	0.037422	0.0367248		-0.0420283	0	46.5671	0.0214744
						-0.23347	0.369575	46.9994	0.0212769	0.0370037	3.5194e-07	0.000508073	0.0372577	0.0327439		0	0.369575	46.9169	0.0213143	0.0324349	2.19614e-07	0.00045683	0.0326633	0.0227245		0.00913023	0.369575	46.9171	0.0213142	0.032448	2.19879e-07	0.000456992	0.0326765	0.0227439		0.382859	0.369575	47.1122	0.0212259	0.0376802	4.00842e-07	0.000515943	0.0379381	0.0367247		-0.0424852	0	46.5669	0.0214745
						-0.233248	0.369118	46.9986	0.0212772	0.0375118	3.51902e-07	0.000507704	0.0377656	0.0327642		0	0.369118	46.9165	0.0213145	0.0328917	2.19614e-07	0.00045683	0.0331201	0.0227245		0.00911806	0.369118	46.9166	0.0213144	0.0329049	2.19879e-07	0.000456991	0.0331334	0.0227439		0.382619	0.369118	47.1113	0.0212263	0.0381961	4.00528e-07	0.000515541	0.0384539	0.0367246		-0.042942	0	46.5667	0.0214746
						-0.233026	0.368661	46.9978	0.0212776	0.0380195	3.52635e-07	0.000507339	0.0382731	0.0328561		0	0.368661	46.916	0.0213147	0.0333486	2.19614e-07	0.00045683	0.033577	0.0227245		0.00910592	0.368661	46.9161	0.0213146	0.0333619	2.19879e-07	0.00045699	0.0335904	0.0227439		0.38238	0.368661	47.1104	0.0212267	0.0387116	4.00216e-07	0.000515143	0.0389692	0.0367244		-0.0433988	0	46.5665	0.0214747
						-0.232805	0.368205	46.997	0.0212779	0.0385268	3.52384e-07	0.000506976	0.0387803	0.0328561		0	0.368205	46.9155	0.0213149	0.0338054	2.19614e-07	0.00045683	0.0340338	0.0227245		0.00909381	0.368205	46.9156	0.0213149	0.0338189	2.19866e-07	0.000456989	0.0340474	0.0227426		0.382142	0.368205	47.1095	0.0212271	0.0392268	3.99882e-07	0.000514748	0.0394842	0.0367219		-0.0438556	0	46.5663	0.0214748
						-0.232586	0.367748	46.9963	0.0212783	0.0390338	3.52134e-07	0.000506617	0.0392871	0.0328561		0	0.367748	46.915	0.0213151	0.0342622	2.19614e-07	0.00045683	0.0344906	0.0227245		0.00908173	0.367748	46.9151	0.0213151	0.0342759	2.19774e-07	0.000456989	0.0345044	0.0227331		0.381905	0.367748	47.1087	0.0212275	0.0397415	3.98413e-07	0.000514357	0.0399987	0.0366148		-0.0443125	0	46.5661	0.0214749
						-0.232367	0.367291	46.9955	0.0212786	0.0395404	3.51886e-07	0.000506261	0.0397935	0.0328561		0	0.367291	46.9145	0.0213154	0.034719	2.19614e-07	0.00045683	0.0349475	0.0227245		0.00906968	0.367291	46.9147	0.0213153	0.0347329	2.19774e-07	0.000456988	0.0349614	0.0227331		0.381669	0.367291	47.1078	0.0212279	0.0402559	3.99951e-07	0.000513974	0.0405129	0.0367836		-0.0447693	0	46.5659	0.0214749
						-0.232148	0.366834	46.9947	0.021279	0.0400467	3.55574e-07	0.000505908	0.0402996	0.0332235		0	0.366834	46.914	0.0213156	0.0351759	2.1798e-07	0.00045683	0.0354043	0.0225554		0.00905766	0.366834	46.9142	0.0213155	0.0351899	2.18256e-07	0.000456987	0.0354184	0.0225761		0.381433	0.366834	47.1069	0.0212283	0.0407699	4.13856e-07	0.000513595	0.0410267	0.0380905		-0.0452261	0	46.5657	0.021475
						-0.231931	0.366377	46.9939	0.0212794	0.0405526	3.55306e-07	0.000505526	0.0408053	0.0332236		0	0.366377	46.9136	0.0213158	0.0356327	2.1798e-07	0.00045683	0.0358611	0.0225554		0.00904567	0.366377	46.9137	0.0213157	0.0356469	2.18255e-07	0.000456986	0.0358754	0.0225761		0.381198	0.366377	47.106	0.0212287	0.0412835	4.13531e-07	0.000513185	0.0415401	0.038091		-0.045683	0	46.5655	0.0214751
						-0.231715	0.365921	46.9931	0.0212797	0.0410581	3.5504e-07	0.000505148	0.0413107	0.0332236		0	0.365921	46.9131	0.021316	0.0360895	2.1798e-07	0.00045683	0.036318	0.0225554		0.00903371	0.365921	46.9132	0.021316	0.0361039	2.18255e-07	0.000456985	0.0363324	0.0225761		0.380964	0.365921	47.1051	0.0212291	0.0417966	4.13209e-07	0.00051278	0.042053	0.0380914		-0.0461398	0	46.5653	0.0214752
						-0.231499	0.365464	46.9923	0.0212801	0.0415632	3.54775e-07	0.000504773	0.0418156	0.0332234		0	0.365464	46.9126	0.0213162	0.0365464	2.1798e-07	0.00045683	0.0367748	0.0225554		0.00902179	0.365464	46.9127	0.0213162	0.0365609	2.18254e-07	0.000456984	0.0367893	0.0225762		0.380732	0.365464	47.1041	0.0212296	0.0423094	4.12889e-07	0.000512378	0.0425656	0.0380918		-0.0465966	0	46.565	0.0214753
						-0.231284	0.365007	46.9916	0.0212804	0.042068	3.53626e-07	0.000504402	0.0423202	0.0331402		0	0.365007	46.9121	0.0213165	0.0370032	2.1798e-07	0.00045683	0.0372316	0.0225554		0.0090099	0.365007	46.9123	0.0213164	0.0370178	2.18254e-07	0.000456983	0.0372463	0.0225762		0.3805	0.365007	47.1032	0.02123	0.0428218	4.12572e-07	0.00051198	0.0430778	0.038092		-0.0470534	0	46.5648	0.0214754
						-0.23107	0.36455	46.9908	0.0212808	0.0425724	3.52039e-07	0.000504032	0.0428244	0.0330157		0	0.36455	46.9116	0.0213167	0.03746	2.1798e-07	0.00045683	0.0376884	0.0225554		0.00899805	0.36455	46.9118	0.0213166	0.0374748	2.18254e-07	0.000456982	0.0377033	0.0225762		0.380268	0.36455	47.1023	0.0212304	0.0433338	4.12256e-07	0.000511587	0.0435896	0.0380922		-0.0475103	0	46.5646	0.0214755
						-0.230857	0.364093	46.99	0.0212811	0.0430764	3.51786e-07	0.000503665	0.0433283	0.033016		0	0.364093	46.9112	0.0213169	0.0379169	2.1798e-07	0.00045683	0.0381453	0.0225554		0.00898623	0.364093	46.9113	0.0213168	0.0379318	2.18253e-07	0.000456982	0.0381603	0.0225762		0.380038	0.364093	47.1014	0.0212308	0.0438454	4.12897e-07	0.000511196	0.044101	0.0381805		-0.0479671	0	46.5644	0.0214756
						-0.230645	0.363636	46.9892	0.0212815	0.0435801	3.51534e-07	0.000503301	0.0438318	0.0330163		0	0.363636	46.9107	0.0213171	0.0383737	2.1798e-07	0.00045683	0.0386021	0.0225554		0.00897445	0.363636	46.9108	0.021317	0.0383888	2.18253e-07	0.000456981	0.0386173	0.0225762		0.379809	0.363636	47.1005	0.0212312	0.0443566	4.14022e-07	0.00051081	0.044612	0.0383135		-0.0484239	0	46.5642	0.0214757
						-0.230434	0.36318	46.9885	0.0212818	0.0440834	3.51284e-07	0.00050294	0.0443349	0.0330164		0	0.36318	46.9102	0.0213173	0.0388305	2.1798e-07	0.00045683	0.0390589	0.0225554		0.0089627	0.36318	46.9103	0.0213173	0.0388458	2.18207e-07	0.00045698	0.0390743	0.0225715		0.37958	0.36318	47.0996	0.0212316	0.0448674	4.13709e-07	0.000510427	0.0451226	0.0383133		-0.0488808	0	46.5639	0.0214758
						-0.230224	0.362723	46.9877	0.0212822	0.0445864	3.51036e-07	0.000502583	0.0448376	0.0330165		0	0.362723	46.9097	0.0213175	0.0392873	2.1798e-07	0.00045683	0.0395158	0.0225554		0.00895098	0.362723	46.9099	0.0213175	0.0393027	2.18137e-07	0.000456979	0.0395312	0.0225642		0.379352	0.362723	47.0986	0.021232	0.0453778	4.13399e-07	0.000510048	0.0456328	0.038313		-0.0493376	0	46.5637	0.0214759
						-0.230014	0.362266	46.9869	0.0212825	0.0450889	3.50788e-07	0.000502229	0.04534	0.0330165		0	0.362266	46.9092	0.0213178	0.0397442	2.1798e-07	0.00045683	0.0399726	0.0225554		0.0089393	0.362266	46.9094	0.0213177	0.0397597	2.18136e-07	0.000456978	0.0399882	0.0225643		0.379126	0.362266	47.0977	0.0212324	0.0458879	4.1309e-07	0.000509672	0.0461427	0.0383126		-0.0497944	0	46.5635	0.021476
						-0.229806	0.361809	46.9861	0.0212829	0.0455912	3.54237e-07	0.000501878	0.0458421	0.0333645		0	0.361809	46.9088	0.021318	0.040201	2.16777e-07	0.00045683	0.0404294	0.0224309		0.00892765	0.361809	46.9089	0.0213179	0.0402167	2.17061e-07	0.000456977	0.0404452	0.022453		0.3789	0.361809	47.0968	0.0212329	0.0463975	4.27149e-07	0.0005093	0.0466522	0.0396455		-0.0502513	0	46.5633	0.0214761
						-0.229598	0.361352	46.9853	0.0212832	0.046093	3.53971e-07	0.0005015	0.0463438	0.0333646		0	0.361352	46.9083	0.0213182	0.0406578	2.16777e-07	0.00045683	0.0408862	0.0224309		0.00891604	0.361352	46.9084	0.0213181	0.0406737	2.1706e-07	0.000456976	0.0409022	0.022453		0.378674	0.361352	47.0959	0.0212333	0.0469068	4.26818e-07	0.000508899	0.0471613	0.039646		-0.0507081	0	46.563	0.0214763
						-0.229391	0.360895	46.9846	0.0212836	0.0465945	3.53707e-07	0.000501125	0.0468451	0.0333646		0	0.360895	46.9078	0.0213184	0.0411147	2.16777e-07	0.00045683	0.0413431	0.0224309		0.00890446	0.360895	46.9079	0.0213184	0.0411307	2.1706e-07	0.000456975	0.0413591	0.022453		0.37845	0.360895	47.0949	0.0212337	0.0474157	4.26575e-07	0.000508502	0.04767	0.0396544		-0.0511649	0	46.5628	0.0214764
						-0.229185	0.360439	46.9838	0.0212839	0.0470957	3.53445e-07	0.000500755	0.047346	0.0333645		0	0.360439	46.9073	0.0213186	0.0415715	2.16777e-07	0.00045683	0.0417999	0.0224309		0.00889292	0.360439	46.9075	0.0213186	0.0415876	2.17059e-07	0.000456974	0.0418161	0.022453		0.378227	0.360439	47.094	0.0212341	0.0479242	4.28257e-07	0.000508108	0.0481783	0.0398416		-0.0516217	0	46.5625	0.0214765
						-0.22898	0.359982	46.983	0.0212843	0.0475964	3.53184e-07	0.000500387	0.0478466	0.0333643		0	0.359982	46.9069	0.0213188	0.0420283	2.16777e-07	0.00045683	0.0422567	0.0224309		0.00888142	0.359982	46.907	0.0213188	0.0420446	2.17059e-07	0.000456973	0.0422731	0.022453		0.378004	0.359982	47.093	0.0212346	0.0484323	4.2793e-07	0.000507719	0.0486862	0.0398416		-0.0520786	0	46.5623	0.0214766
						-0.228776	0.359525	46.9822	0.0212846	0.0480968	3.53955e-07	0.000500023	0.0483468	0.0334616		0	0.359525	46.9064	0.0213191	0.0424852	2.16777e-07	0.00045683	0.0427136	0.0224309		0.00886996	0.359525	46.9065	0.021319	0.0425016	2.17059e-07	0.000456972	0.0427301	0.022453		0.377783	0.359525	47.0921	0.021235	0.0489401	4.27604e-07	0.000507334	0.0491937	0.0398416		-0.0525354	0	46.5621	0.0214767
						-0.228572	0.359068	46.9814	0.021285	0.0485968	3.54332e-07	0.000499662	0.0488467	0.0335214		0	0.359068	46.9059	0.0213193	0.042942	2.16777e-07	0.00045683	0.0431704	0.0224309		0.00885853	0.359068	46.906	0.0213192	0.0429586	2.17058e-07	0.000456971	0.043187	0.022453		0.377562	0.359068	47.0911	0.0212354	0.0494474	4.27281e-07	0.000506952	0.0497009	0.0398414		-0.0529922	0	46.5618	0.0214768
						-0.22837	0.358611	46.9807	0.0212854	0.0490965	3.54081e-07	0.000499305	0.0493461	0.0335216		0	0.358611	46.9054	0.0213195	0.0433988	2.16777e-07	0.00045683	0.0436272	0.0224309		0.00884715	0.358611	46.9055	0.0213194	0.0434155	2.17058e-07	0.000456971	0.043644	0.022453		0.377342	0.358611	47.0902	0.0212359	0.0499543	4.2696e-07	0.000506574	0.0502076	0.0398412		-0.0534491	0	46.5616	0.0214769
						-0.228168	0.358154	46.9799	0.0212857	0.0495958	3.53831e-07	0.000498951	0.0498453	0.0335217		0	0.358154	46.9049	0.0213197	0.0438556	2.16777e-07	0.00045683	0.0440841	0.0224309		0.0088358	0.358154	46.9051	0.0213197	0.0438725	2.16973e-07	0.00045697	0.044101	0.0224443		0.377124	0.358154	47.0892	0.0212363	0.0504609	4.26641e-07	0.0005062	0.050714	0.0398408		-0.0539059	0	46.5613	0.0214771
						-0.227968	0.357698	46.9791	0.0212861	0.0500947	3.53583e-07	0.0004986	0.050344	0.0335218		0	0.357698	46.9045	0.0213199	0.0443125	2.16777e-07	0.00045683	0.0445409	0.0224309		0.00882449	0.357698	46.9046	0.0213199	0.0443295	2.1693e-07	0.000456969	0.0445579	0.0224399		0.376905	0.357698	47.0883	0.0212367	0.0509671	4.25364e-07	0.000505829	0.05122	0.0397507		-0.0543627	0	46.5611	0.0214772
						-0.227768	0.357241	46.9783	0.0212864	0.0505933	3.53336e-07	0.000498252	0.0508425	0.0335218		0	0.357241	46.904	0.0213201	0.0447693	2.16777e-07	0.00045683	0.0449977	0.0224309		0.00881322	0.357241	46.9041	0.0213201	0.0447864	2.1693e-07	0.000456968	0.0450149	0.02244		0.376688	0.357241	47.0873	0.0212371	0.0514729	4.25938e-07	0.000505466	0.0517257	0.0398329		-0.0548196	0	46.5608	0.0214773
						-0.227569	0.356784	46.9775	0.0212868	0.0510916	3.5686e-07	0.000497907	0.0513406	0.0338795		0	0.356784	46.9035	0.0213204	0.0452261	2.16001e-07	0.00045683	0.0454545	0.0223506		0.00880198	0.356784	46.9036	0.0213203	0.0452434	2.16292e-07	0.000456967	0.0454719	0.022374		0.376472	0.356784	47.0864	0.0212376	0.0519784	4.4179e-07	0.000505106	0.052231	0.0413448		-0.0552764	0	46.5606	0.0214774
						-0.227371	0.356327	46.9767	0.0212871	0.0515895	3.56596e-07	0.000497538	0.0518383	0.0338796		0	0.356327	46.903	0.0213206	0.045683	2.16001e-07	0.00045683	0.0459114	0.0223506		0.00879078	0.356327	46.9032	0.0213205	0.0457004	2.16291e-07	0.000456966	0.0459289	0.022374		0.376256	0.356327	47.0854	0.021238	0.0524835	4.41458e-07	0.000504719	0.0527359	0.0413454		-0.0557332	0	46.5603	0.0214775
						-0.227174	0.35587	46.976	0.0212875	0.052087	3.56333e-07	0.000497173	0.0523356	0.0338795		0	0.35587	46.9026	0.0213208	0.0461398	2.16001e-07	0.00045683	0.0463682	0.0223506		0.00877963	0.35587	46.9027	0.0213207	0.0461573	2.16291e-07	0.000456965	0.0463858	0.022374		0.376042	0.35587	47.0844	0.0212384	0.0529882	4.41128e-07	0.000504336	0.0532404	0.0413459		-0.05619	0	46.5601	0.0214776
						-0.226978	0.355413	46.9752	0.0212878	0.0525842	3.56072e-07	0.00049681	0.0528326	0.0338794		0	0.355413	46.9021	0.021321	0.0465966	2.16001e-07	0.00045683	0.046825	0.0223506		0.00876851	0.355413	46.9022	0.021321	0.0466143	2.16291e-07	0.000456964	0.0468428	0.022374		0.375828	0.355413	47.0835	0.0212389	0.0534926	4.40801e-07	0.000503957	0.0537445	0.0413463		-0.0566469	0	46.5598	0.0214778
						-0.226782	0.354957	46.9744	0.0212882	0.053081	3.55812e-07	0.000496452	0.0533293	0.0338791		0	0.354957	46.9016	0.0213212	0.0470534	2.16001e-07	0.00045683	0.0472819	0.0223506		0.00875744	0.354957	46.9017	0.0213212	0.0470713	2.1629e-07	0.000456963	0.0472997	0.022374		0.375615	0.354957	47.0825	0.0212393	0.0539965	4.40475e-07	0.000503582	0.0542483	0.0413466		-0.0571037	0	46.5595	0.0214779
						-0.226588	0.3545	46.9736	0.0212886	0.0535775	3.55554e-07	0.000496096	0.0538255	0.0338788		0	0.3545	46.9011	0.0213214	0.0475103	2.16001e-07	0.00045683	0.0477387	0.0223506		0.00874641	0.3545	46.9013	0.0213214	0.0475282	2.1629e-07	0.000456962	0.0477567	0.022374		0.375404	0.3545	47.0815	0.0212398	0.0545001	4.40152e-07	0.000503211	0.0547517	0.0413467		-0.0575605	0	46.5592	0.021478
						-0.226395	0.354043	46.9728	0.0212889	0.0540736	3.55297e-07	0.000495744	0.0543214	0.0338783		0	0.354043	46.9007	0.0213217	0.0479671	2.16001e-07	0.00045683	0.0481955	0.0223506		0.00873542	0.354043	46.9008	0.0213216	0.0479852	2.16289e-07	0.000456961	0.0482137	0.022374		0.375192	0.354043	47.0805	0.0212402	0.0550033	4.39973e-07	0.000502843	0.0552547	0.0413601		-0.0580174	0	46.559	0.0214781
						-0.226202	0.353586	46.972	0.0212893	0.0545693	3.53609e-07	0.000495395	0.054817	0.0337411		0	0.353586	46.9002	0.0213219	0.0484239	2.16001e-07	0.00045683	0.0486524	0.0223506		0.00872447	0.353586	46.9003	0.0213218	0.0484421	2.16289e-07	0.00045696	0.0486706	0.022374		0.374982	0.353586	47.0796	0.0212406	0.0555062	4.40776e-07	0.000502479	0.0557574	0.0414656		-0.0584742	0	46.5587	0.0214783
						-0.22601	0.353129	46.9713	0.0212896	0.0550647	3.52513e-07	0.000495049	0.0553122	0.0336601		0	0.353129	46.8997	0.0213221	0.0488808	2.16001e-07	0.00045683	0.0491092	0.0223506		0.00871356	0.353129	46.8998	0.021322	0.0488991	2.16161e-07	0.000456959	0.0491276	0.0223608		0.374773	0.353129	47.0786	0.0212411	0.0560086	4.40457e-07	0.000502118	0.0562597	0.0414654		-0.058931	0	46.5584	0.0214784
						-0.22582	0.352672	46.9705	0.02129	0.0555598	3.5227e-07	0.000494705	0.0558071	0.0336602		0	0.352672	46.8992	0.0213223	0.0493376	2.16001e-07	0.00045683	0.049566	0.0223506		0.00870269	0.352672	46.8994	0.0213223	0.0493561	2.1615e-07	0.000456958	0.0495845	0.0223598		0.374565	0.352672	47.0776	0.0212415	0.0565108	4.40141e-07	0.000501762	0.0567616	0.0414651		-0.0593878	0	46.5582	0.0214785
						-0.22563	0.352216	46.9697	0.0212903	0.0560545	3.52028e-07	0.000494364	0.0563017	0.0336603		0	0.352216	46.8988	0.0213225	0.0497944	2.16001e-07	0.00045683	0.0500228	0.0223506		0.00869186	0.352216	46.8989	0.0213225	0.049813	2.1615e-07	0.000456957	0.0500415	0.0223598		0.374357	0.352216	47.0766	0.021242	0.0570125	4.39827e-07	0.000501408	0.0572632	0.0414647		-0.0598447	0	46.5579	0.0214786
						-0.225441	0.351759	46.9689	0.0212907	0.0565488	3.55301e-07	0.000494027	0.0567958	0.0339965		0	0.351759	46.8983	0.0213227	0.0502513	2.15633e-07	0.00045683	0.0504797	0.0223125		0.00868108	0.351759	46.8984	0.0213227	0.05027	2.1593e-07	0.000456956	0.0504985	0.0223371		0.37415	0.351759	47.0756	0.0212424	0.0575139	4.56173e-07	0.000501059	0.0577645	0.0430357		-0.0603015	0	46.5576	0.0214788
						-0.225253	0.351302	46.9681	0.021291	0.0570429	3.55044e-07	0.000493667	0.0572897	0.0339966		0	0.351302	46.8978	0.021323	0.0507081	2.15633e-07	0.00045683	0.0509365	0.0223125		0.00867033	0.351302	46.8979	0.0213229	0.0507269	2.1593e-07	0.000456955	0.0509554	0.0223371		0.373945	0.351302	47.0746	0.0212429	0.058015	4.55836e-07	0.000500682	0.0582653	0.0430362		-0.0607583	0	46.5573	0.0214789
						-0.225066	0.350845	46.9674	0.0212914	0.0575365	3.55738e-07	0.000493311	0.0577832	0.0340877		0	0.350845	46.8973	0.0213232	0.0511649	2.15633e-07	0.00045683	0.0513933	0.0223125		0.00865963	0.350845	46.8975	0.0213231	0.0511839	2.1593e-07	0.000456954	0.0514124	0.0223371		0.37374	0.350845	47.0736	0.0212433	0.0585157	4.55501e-07	0.00050031	0.0587658	0.0430366		-0.0612152	0	46.557	0.021479
						-0.22488	0.350388	46.9666	0.0212917	0.0580298	3.56693e-07	0.000492958	0.0582763	0.0342037		0	0.350388	46.8969	0.0213234	0.0516217	2.15633e-07	0.00045683	0.0518502	0.0223125		0.00864898	0.350388	46.897	0.0213233	0.0516408	2.15929e-07	0.000456953	0.0518693	0.0223372		0.373536	0.350388	47.0726	0.0212438	0.059016	4.5565e-07	0.000499942	0.059266	0.0430823		-0.061672	0	46.5567	0.0214792
						-0.224694	0.349931	46.9658	0.0212921	0.0585228	3.56447e-07	0.000492609	0.0587691	0.0342043		0	0.349931	46.8964	0.0213236	0.0520786	2.15633e-07	0.00045683	0.052307	0.0223125		0.00863836	0.349931	46.8965	0.0213236	0.0520978	2.15929e-07	0.000456952	0.0523263	0.0223372		0.373333	0.349931	47.0716	0.0212442	0.0595159	4.55733e-07	0.000499578	0.0597657	0.0431217		-0.0621288	0	46.5564	0.0214793
						-0.22451	0.349475	46.965	0.0212925	0.0590154	3.56203e-07	0.000492263	0.0592615	0.0342049		0	0.349475	46.8959	0.0213238	0.0525354	2.15633e-07	0.00045683	0.0527638	0.0223125		0.0086278	0.349475	46.896	0.0213238	0.0525548	2.15928e-07	0.000456951	0.0527832	0.0223372		0.37313	0.349475	47.0706	0.0212447	0.0600155	4.55404e-07	0.000499217	0.0602651	0.0431217		-0.0625857	0	46.5561	0.0214794
						-0.224327	0.349018	46.9642	0.0212928	0.0595077	3.55959e-07	0.00049192	0.0597536	0.0342053		0	0.349018	46.8954	0.021324	0.0529922	2.15633e-07	0.00045683	0.0532206	0.0223125		0.00861727	0.349018	46.8956	0.021324	0.0530117	2.15928e-07	0.00045695	0.0532402	0.0223372		0.372929	0.349018	47.0696	0.0212451	0.0605147	4.55078e-07	0.00049886	0.0607641	0.0431216		-0.0630425	0	46.5558	0.0214796
						-0.224144	0.348561	46.9634	0.0212932	0.0599996	3.55717e-07	0.000491581	0.0602454	0.0342056		0	0.348561	46.895	0.0213242	0.0534491	2.15633e-07	0.00045683	0.0536775	0.0223125		0.0086068	0.348561	46.8951	0.0213242	0.0534687	2.15901e-07	0.000456949	0.0536971	0.0223344		0.372729	0.348561	47.0686	0.0212456	0.0610136	4.54753e-07	0.000498507	0.0612628	0.0431213		-0.0634993	0	46.5555	0.0214797
						-0.223963	0.348104	46.9626	0.0212935	0.0604912	3.55476e-07	0.000491245	0.0607368	0.0342059		0	0.348104	46.8945	0.0213245	0.0539059	2.15633e-07	0.00045683	0.0541343	0.0223125		0.00859636	0.348104	46.8946	0.0213244	0.0539256	2.15778e-07	0.000456948	0.0541541	0.0223218		0.372529	0.348104	47.0676	0.021246	0.0615121	4.54431e-07	0.000498158	0.0617612	0.043121		-0.0639561	0	46.5553	0.0214799
						-0.223782	0.347647	46.9619	0.0212939	0.0609824	3.55237e-07	0.000490912	0.0612279	0.034206		0	0.347647	46.894	0.0213247	0.0543627	2.15633e-07	0.00045683	0.0545911	0.0223125		0.00858597	0.347647	46.8941	0.0213246	0.0543825	2.15778e-07	0.000456947	0.054611	0.0223218		0.37233	0.347647	47.0666	0.0212465	0.0620102	4.5411e-07	0.000497812	0.0622591	0.0431205		-0.064413	0	46.555	0.02148
						-0.223602	0.34719	46.9611	0.0212942	0.0614733	3.54999e-07	0.000490583	0.0617186	0.034206		0	0.34719	46.8935	0.0213249	0.0548196	2.15633e-07	0.00045683	0.055048	0.0223125		0.00857562	0.34719	46.8937	0.0213248	0.0548395	2.15777e-07	0.000456946	0.055068	0.0223218		0.372133	0.34719	47.0656	0.021247	0.0625081	4.53792e-07	0.000497469	0.0627568	0.04312		-0.0648698	0	46.5547	0.0214801
						-0.223423	0.346734	46.9603	0.0212946	0.0619639	3.58312e-07	0.000490256	0.062209	0.0345482		0	0.346734	46.8931	0.0213251	0.0552764	2.15644e-07	0.00045683	0.0555048	0.0223137		0.00856532	0.346734	46.8932	0.0213251	0.0552964	2.15948e-07	0.000456945	0.0555249	0.0223395		0.371936	0.346734	47.0646	0.0212474	0.0630055	4.71204e-07	0.00049713	0.0632541	0.044805		-0.0653266	0	46.5544	0.0214803
						-0.223246	0.346277	46.9595	0.0212949	0.0624542	3.58059e-07	0.00048991	0.0626991	0.0345483		0	0.346277	46.8926	0.0213253	0.0557332	2.15644e-07	0.00045683	0.0559616	0.0223137		0.00855506	0.346277	46.8927	0.0213253	0.0557534	2.15948e-07	0.000456944	0.0559819	0.0223395		0.37174	0.346277	47.0635	0.0212479	0.0635027	4.70569e-07	0.000496769	0.063751	0.0447772		-0.0657835	0	46.554	0.0214804
						-0.223069	0.34582	46.9587	0.0212953	0.0629441	3.57808e-07	0.000489567	0.0631889	0.0345482		0	0.34582	46.8921	0.0213255	0.05619	2.15644e-07	0.00045683	0.0564185	0.0223137		0.00854484	0.34582	46.8922	0.0213255	0.0562103	2.15947e-07	0.000456943	0.0564388	0.0223395		0.371545	0.34582	47.0625	0.0212484	0.0639994	4.70237e-07	0.000496412	0.0642476	0.0447778		-0.0662403	0	46.5537	0.0214806
						-0.222893	0.345363	46.9579	0.0212957	0.0634336	3.57558e-07	0.000489228	0.0636783	0.034548		0	0.345363	46.8917	0.0213258	0.0566469	2.15644e-07	0.00045683	0.0568753	0.0223137		0.00853468	0.345363	46.8918	0.0213257	0.0566673	2.15947e-07	0.000456942	0.0568957	0.0223395		0.37135	0.345363	47.0614	0.0212488	0.0644958	4.69908e-07	0.00049606	0.0647439	0.0447782		-0.0666971	0	46.5534	0.0214807
						-0.222717	0.344906	46.9571	0.021296	0.0639229	3.57309e-07	0.000488892	0.0641673	0.0345477		0	0.344906	46.8912	0.021326	0.0571037	2.15644e-07	0.00045683	0.0573321	0.0223137		0.00852456	0.344906	46.8913	0.0213259	0.0571242	2.15946e-07	0.000456941	0.0573527	0.0223395		0.371157	0.344906	47.0604	0.0212493	0.0649919	4.69581e-07	0.000495711	0.0652397	0.0447786		-0.067154	0	46.5531	0.0214809
						-0.222543	0.34445	46.9564	0.0212964	0.0644118	3.57062e-07	0.000488559	0.064656	0.0345474		0	0.34445	46.8907	0.0213262	0.0575605	2.15644e-07	0.00045683	0.0577889	0.0223137		0.00851449	0.34445	46.8908	0.0213261	0.0575812	2.15946e-07	0.00045694	0.0578096	0.0223395		0.370964	0.34445	47.0593	0.0212498	0.0654876	4.69257e-07	0.000495366	0.0657353	0.0447788		-0.0676108	0	46.5528	0.021481
						-0.22237	0.343993	46.9556	0.0212967	0.0649003	3.56816e-07	0.00048823	0.0651444	0.0345468		0	0.343993	46.8902	0.0213264	0.0580174	2.15644e-07	0.00045683	0.0582458	0.0223137		0.00850446	0.343993	46.8903	0.0213264	0.0580381	2.15945e-07	0.000456939	0.0582666	0.0223395		0.370773	0.343993	47.0583	0.0212502	0.065983	4.68934e-07	0.000495025	0.0662305	0.0447789		-0.0680676	0	46.5524	0.0214812
						-0.222198	0.343536	46.9548	0.0212971	0.0653886	3.56572e-07	0.000487904	0.0656325	0.0345462		0	0.343536	46.8898	0.0213266	0.0584742	2.15644e-07	0.00045683	0.0587026	0.0223137		0.00849448	0.343536	46.8899	0.0213266	0.058495	2.15878e-07	0.000456938	0.0587235	0.0223326		0.370582	0.343536	47.0573	0.0212507	0.066478	4.6861e-07	0.000494687	0.0667253	0.0447784		-0.0685244	0	46.5521	0.0214813
						-0.222027	0.343079	46.954	0.0212974	0.0658765	3.56328e-07	0.000487581	0.0661202	0.0345455		0	0.343079	46.8893	0.0213268	0.058931	2.15644e-07	0.00045683	0.0591594	0.0223137		0.00848455	0.343079	46.8894	0.0213268	0.058952	2.15785e-07	0.000456937	0.0591804	0.0223231		0.370392	0.343079	47.0562	0.0212512	0.0669727	4.6827e-07	0.000494353	0.0672199	0.0447761		-0.0689813	0	46.5518	0.0214815
						-0.221856	0.342622	46.9532	0.0212978	0.066364	3.57166e-07	0.000487261	0.0666077	0.0346494		0	0.342622	46.8888	0.0213271	0.0593878	2.15644e-07	0.00045683	0.0596163	0.0223137		0.00847466	0.342622	46.8889	0.021327	0.0594089	2.15785e-07	0.000456936	0.0596374	0.0223231		0.370204	0.342622	47.0552	0.0212516	0.067467	4.67954e-07	0.000494023	0.067714	0.0447759		-0.0694381	0	46.5515	0.0214816
						-0.221687	0.342165	46.9524	0.0212982	0.0668513	3.58349e-07	0.000486944	0.0670948	0.0347869		0	0.342165	46.8883	0.0213273	0.0598447	2.15644e-07	0.00045683	0.0600731	0.0223137		0.00846482	0.342165	46.8884	0.0213272	0.0598658	2.15784e-07	0.000456935	0.0600943	0.0223231		0.370015	0.342165	47.0542	0.0212521	0.0679611	4.6764e-07	0.000493696	0.0682079	0.0447755		-0.0698949	0	46.5511	0.0214818
						-0.221518	0.341709	46.9516	0.0212985	0.0673382	3.61677e-07	0.000486631	0.0675816	0.0351325		0	0.341709	46.8879	0.0213275	0.0603015	2.16001e-07	0.00045683	0.0605299	0.0223507		0.00845502	0.341709	46.888	0.0213274	0.0603228	2.16311e-07	0.000456934	0.0605512	0.0223776		0.369828	0.341709	47.0531	0.0212526	0.0684548	4.86513e-07	0.000493373	0.0687014	0.0466131		-0.0703518	0	46.5508	0.0214819
						-0.22135	0.341252	46.9508	0.0212989	0.0678249	3.61431e-07	0.0004863	0.068068	0.0351325		0	0.341252	46.8874	0.0213277	0.0607583	2.16001e-07	0.00045683	0.0609868	0.0223507		0.00844527	0.341252	46.8875	0.0213277	0.0607797	2.1631e-07	0.000456933	0.0610082	0.0223776		0.369642	0.341252	47.052	0.0212531	0.0689481	4.86177e-07	0.000493025	0.0691946	0.0466137		-0.0708086	0	46.5505	0.0214821
						-0.221184	0.340795	46.95	0.0212992	0.0683112	3.59961e-07	0.000485972	0.0685542	0.0350132		0	0.340795	46.8869	0.0213279	0.0612152	2.16001e-07	0.00045683	0.0614436	0.0223507		0.00843557	0.340795	46.887	0.0213279	0.0612366	2.1631e-07	0.000456932	0.0614651	0.0223776		0.369457	0.340795	47.051	0.0212535	0.0694412	4.85844e-07	0.000492682	0.0696875	0.0466142		-0.0712654	0	46.5501	0.0214822
						-0.221018	0.340338	46.9492	0.0212996	0.0687971	3.58637e-07	0.000485647	0.06904	0.0349078		0	0.340338	46.8864	0.0213281	0.061672	2.16001e-07	0.00045683	0.0619004	0.0223507		0.00842592	0.340338	46.8865	0.0213281	0.0616936	2.1631e-07	0.000456931	0.061922	0.0223776		0.369272	0.340338	47.0499	0.021254	0.0699338	4.85512e-07	0.000492342	0.07018	0.0466145		-0.0717222	0	46.5498	0.0214824
						-0.220853	0.339881	46.9484	0.0213	0.0692828	3.58408e-07	0.000485325	0.0695255	0.0349086		0	0.339881	46.886	0.0213283	0.0621288	2.16001e-07	0.00045683	0.0623572	0.0223507		0.00841632	0.339881	46.8861	0.0213283	0.0621505	2.16309e-07	0.000456929	0.062379	0.0223776		0.369088	0.339881	47.0488	0.0212545	0.0704262	4.85025e-07	0.000492006	0.0706722	0.0465995		-0.0721791	0	46.5494	0.0214825
						-0.220689	0.339424	46.9477	0.0213003	0.0697681	3.58179e-07	0.000485006	0.0700106	0.0349093		0	0.339424	46.8855	0.0213286	0.0625857	2.16001e-07	0.00045683	0.0628141	0.0223507		0.00840677	0.339424	46.8856	0.0213285	0.0626074	2.16309e-07	0.000456928	0.0628359	0.0223776		0.368906	0.339424	47.0477	0.021255	0.0709182	4.84382e-07	0.000491674	0.071164	0.0465692		-0.0726359	0	46.5491	0.0214827
						-0.220526	0.338968	46.9469	0.0213007	0.0702531	3.57952e-07	0.000484691	0.0704955	0.0349098		0	0.338968	46.885	0.0213288	0.0630425	2.16001e-07	0.00045683	0.0632709	0.0223507		0.00839726	0.338968	46.8851	0.0213287	0.0630644	2.16308e-07	0.000456927	0.0632928	0.0223776		0.368724	0.338968	47.0467	0.0212555	0.0714099	4.84058e-07	0.000491346	0.0716555	0.0465691		-0.0730927	0	46.5487	0.0214829
						-0.220364	0.338511	46.9461	0.021301	0.0707378	3.57726e-07	0.000484378	0.07098	0.0349103		0	0.338511	46.8845	0.021329	0.0634993	2.16001e-07	0.00045683	0.0637277	0.0223507		0.00838781	0.338511	46.8846	0.021329	0.0635213	2.16198e-07	0.000456926	0.0637498	0.0223663		0.368543	0.338511	47.0456	0.021256	0.0719012	4.83737e-07	0.000491021	0.0721467	0.046569		-0.0735496	0	46.5484	0.021483
						-0.220203	0.338054	46.9453	0.0213014	0.0712222	3.57501e-07	0.000484069	0.0714642	0.0349106		0	0.338054	46.8841	0.0213292	0.0639561	2.16001e-07	0.00045683	0.0641846	0.0223507		0.0083784	0.338054	46.8842	0.0213292	0.0639782	2.16138e-07	0.000456925	0.0642067	0.0223601		0.368363	0.338054	47.0445	0.0212565	0.0723922	4.83417e-07	0.0004907	0.0726376	0.0465687		-0.0740064	0	46.548	0.0214832
						-0.220043	0.337597	46.9445	0.0213017	0.0717063	3.57277e-07	0.000483763	0.0719481	0.0349108		0	0.337597	46.8836	0.0213294	0.064413	2.16001e-07	0.00045683	0.0646414	0.0223507		0.00836904	0.337597	46.8837	0.0213294	0.0644351	2.16137e-07	0.000456925	0.0646636	0.0223601		0.368184	0.337597	47.0435	0.0212569	0.0728829	4.831e-07	0.000490383	0.0731281	0.0465682		-0.0744632	0	46.5477	0.0214834
						-0.219884	0.33714	46.9437	0.0213021	0.07219	3.57054e-07	0.000483461	0.0724318	0.0349109		0	0.33714	46.8831	0.0213296	0.0648698	2.16001e-07	0.00045683	0.0650982	0.0223507		0.00835972	0.33714	46.8832	0.0213296	0.0648921	2.16137e-07	0.000456924	0.0651205	0.0223601		0.368006	0.33714	47.0424	0.0212574	0.0733733	4.82785e-07	0.000490068	0.0736183	0.0465677		-0.0749201	0	46.5473	0.0214835
						-0.219726	0.336683	46.9429	0.0213025	0.0726735	3.60077e-07	0.000483161	0.0729151	0.0352283		0	0.336683	46.8826	0.0213299	0.0653266	2.16668e-07	0.00045683	0.065555	0.0224196		0.00835046	0.336683	46.8827	0.0213298	0.065349	2.16983e-07	0.000456923	0.0655775	0.0224476		0.367828	0.336683	47.0413	0.0212579	0.0738634	5.02998e-07	0.000489758	0.0741083	0.0485482		-0.0753769	0	46.547	0.0214837
						-0.219569	0.336227	46.9421	0.0213028	0.0731566	3.59842e-07	0.000482846	0.0733981	0.0352283		0	0.336227	46.8822	0.0213301	0.0657835	2.16668e-07	0.00045683	0.0660119	0.0224196		0.00834124	0.336227	46.8823	0.02133	0.0658059	2.16982e-07	0.000456922	0.0660344	0.0224476		0.367652	0.336227	47.0402	0.0212584	0.0743531	5.02248e-07	0.000489424	0.0745978	0.0485089		-0.0758337	0	46.5466	0.0214839
						-0.219412	0.33577	46.9413	0.0213032	0.0736395	3.59609e-07	0.000482534	0.0738808	0.0352283		0	0.33577	46.8817	0.0213303	0.0662403	2.16668e-07	0.00045683	0.0664687	0.0224196		0.00833208	0.33577	46.8818	0.0213302	0.0662628	2.16982e-07	0.000456921	0.0664913	0.0224476		0.367476	0.33577	47.0391	0.0212589	0.0748426	5.01368e-07	0.000489095	0.0750871	0.0484565		-0.0762905	0	46.5462	0.021484
						-0.219257	0.335313	46.9406	0.0213035	0.074122	3.59377e-07	0.000482225	0.0743631	0.0352281		0	0.335313	46.8812	0.0213305	0.0666971	2.16668e-07	0.00045683	0.0669255	0.0224196		0.00832296	0.335313	46.8813	0.0213305	0.0667198	2.16981e-07	0.00045692	0.0669482	0.0224476		0.367301	0.335313	47.038	0.0212594	0.0753317	5.01037e-07	0.000488769	0.075576	0.0484567		-0.0767474	0	46.5458	0.0214842
						-0.219102	0.334856	46.9398	0.0213039	0.0746042	3.60432e-07	0.00048192	0.0748452	0.0353539		0	0.334856	46.8807	0.0213307	0.067154	2.16668e-07	0.00045683	0.0673824	0.0224196		0.00831389	0.334856	46.8808	0.0213307	0.0671767	2.16981e-07	0.000456919	0.0674051	0.0224476		0.367128	0.334856	47.0369	0.0212599	0.0758204	5.00708e-07	0.000488447	0.0760646	0.0484569		-0.0772042	0	46.5454	0.0214844
						-0.218949	0.334399	46.939	0.0213043	0.0750862	3.61986e-07	0.000481617	0.075327	0.0355285		0	0.334399	46.8803	0.0213309	0.0676108	2.16668e-07	0.00045683	0.0678392	0.0224196		0.00830488	0.334399	46.8803	0.0213309	0.0676336	2.1698e-07	0.000456918	0.0678621	0.0224476		0.366955	0.334399	47.0358	0.0212604	0.0763089	5.00183e-07	0.000488129	0.0765529	0.0484376		-0.077661	0	46.5451	0.0214846
						-0.218796	0.333942	46.9382	0.0213046	0.0755678	3.61767e-07	0.000481318	0.0758084	0.0355291		0	0.333942	46.8798	0.0213312	0.0680676	2.16668e-07	0.00045683	0.068296	0.0224196		0.00829591	0.333942	46.8799	0.0213311	0.0680905	2.1698e-07	0.000456917	0.068319	0.0224476		0.366783	0.333942	47.0347	0.0212609	0.076797	4.99398e-07	0.000487815	0.0770409	0.0483926		-0.0781179	0	46.5447	0.0214847
						-0.218645	0.333486	46.9374	0.021305	0.0760491	3.61549e-07	0.000481023	0.0762896	0.0355295		0	0.333486	46.8793	0.0213314	0.0685244	2.16668e-07	0.00045683	0.0687529	0.0224196		0.008287	0.333486	46.8794	0.0213313	0.0685474	2.16824e-07	0.000456916	0.0687759	0.0224316		0.366612	0.333486	47.0336	0.0212614	0.0772848	4.99082e-07	0.000487507	0.0775286	0.0483926		-0.0785747	0	46.5443	0.0214849
						-0.218494	0.333029	46.9366	0.0213053	0.0765301	3.61332e-07	0.00048073	0.0767705	0.0355298		0	0.333029	46.8788	0.0213316	0.0689813	2.16668e-07	0.00045683	0.0692097	0.0224196		0.00827813	0.333029	46.8789	0.0213316	0.0690043	2.16799e-07	0.000456915	0.0692328	0.022429		0.366441	0.333029	47.0325	0.0212619	0.0777723	4.98769e-07	0.000487203	0.0780159	0.0483925		-0.0790315	0	46.5439	0.0214851
						-0.218344	0.332572	46.9358	0.0213057	0.0770109	3.61116e-07	0.000480441	0.0772511	0.03553		0	0.332572	46.8784	0.0213318	0.0694381	2.16668e-07	0.00045683	0.0696665	0.0224196		0.00826932	0.332572	46.8784	0.0213318	0.0694613	2.16799e-07	0.000456914	0.0696897	0.022429		0.366272	0.332572	47.0314	0.0212624	0.0782595	4.97811e-07	0.000486902	0.078503	0.0483293		-0.0794884	0	46.5436	0.0214853
						-0.218196	0.332115	46.935	0.0213061	0.0774913	3.60902e-07	0.000480154	0.0777314	0.0355301		0	0.332115	46.8779	0.021332	0.0698949	2.16668e-07	0.00045683	0.0701233	0.0224196		0.00826055	0.332115	46.878	0.021332	0.0699182	2.16798e-07	0.000456913	0.0701466	0.022429		0.366104	0.332115	47.0303	0.0212629	0.0787464	4.96672e-07	0.000486605	0.0789897	0.0482483		-0.0799452	0	46.5432	0.0214854
						-0.218048	0.331658	46.9342	0.0213064	0.0779715	3.63885e-07	0.000479871	0.0782114	0.035845		0	0.331658	46.8774	0.0213322	0.0703518	2.17606e-07	0.00045683	0.0705802	0.0225167		0.00825183	0.331658	46.8775	0.0213322	0.0703751	2.17926e-07	0.000456912	0.0706035	0.0225458		0.365936	0.331658	47.0292	0.0212634	0.079233	5.18322e-07	0.000486311	0.0794762	0.0503818		-0.080402	0	46.5428	0.0214856
						-0.217901	0.331201	46.9334	0.0213068	0.0784513	3.6366e-07	0.000479574	0.0786911	0.035845		0	0.331201	46.8769	0.0213325	0.0708086	2.17606e-07	0.00045683	0.071037	0.0225167		0.00824317	0.331201	46.877	0.0213324	0.070832	2.17926e-07	0.000456911	0.0710605	0.0225458		0.365769	0.331201	47.028	0.0212639	0.0797193	5.17993e-07	0.000485995	0.0799623	0.0503826		-0.0808588	0	46.5424	0.0214858
						-0.217755	0.330745	46.9326	0.0213072	0.0789309	3.63436e-07	0.00047928	0.0791705	0.0358449		0	0.330745	46.8764	0.0213327	0.0712654	2.17606e-07	0.00045683	0.0714938	0.0225167		0.00823455	0.330745	46.8765	0.0213326	0.0712889	2.17925e-07	0.00045691	0.0715174	0.0225458		0.365603	0.330745	47.0269	0.0212644	0.0802053	5.17667e-07	0.000485683	0.0804482	0.0503832		-0.0813157	0	46.542	0.021486
						-0.21761	0.330288	46.9318	0.0213075	0.0794102	3.63213e-07	0.000478989	0.0796497	0.0358446		0	0.330288	46.876	0.0213329	0.0717222	2.17606e-07	0.00045683	0.0719507	0.0225167		0.00822598	0.330288	46.8761	0.0213329	0.0717458	2.17925e-07	0.000456909	0.0719743	0.0225458		0.365438	0.330288	47.0257	0.021265	0.080691	5.17343e-07	0.000485375	0.0809337	0.0503836		-0.0817725	0	46.5416	0.0214862
						-0.217466	0.329831	46.931	0.0213079	0.0798892	3.62991e-07	0.000478701	0.0801285	0.0358442		0	0.329831	46.8755	0.0213331	0.0721791	2.17606e-07	0.00045683	0.0724075	0.0225167		0.00821747	0.329831	46.8756	0.0213331	0.0722027	2.17924e-07	0.000456908	0.0724312	0.0225458		0.365274	0.329831	47.0246	0.0212655	0.0811764	5.17022e-07	0.000485071	0.0814189	0.0503839		-0.0822293	0	46.5412	0.0214864
						-0.217323	0.329374	46.9302	0.0213082	0.0803679	3.6277e-07	0.000478417	0.0806071	0.0358437		0	0.329374	46.875	0.0213333	0.0726359	2.17606e-07	0.00045683	0.0728643	0.0225167		0.00820901	0.329374	46.8751	0.0213333	0.0726596	2.17924e-07	0.000456907	0.0728881	0.0225458		0.365111	0.329374	47.0234	0.021266	0.0816615	5.16703e-07	0.00048477	0.0819039	0.050384		-0.0826862	0	46.5408	0.0214865
						-0.217181	0.328917	46.9294	0.0213086	0.0808463	3.62551e-07	0.000478136	0.0810854	0.0358431		0	0.328917	46.8745	0.0213335	0.0730927	2.17606e-07	0.00045683	0.0733212	0.0225167		0.0082006	0.328917	46.8746	0.0213335	0.0731165	2.17911e-07	0.000456906	0.073345	0.0225445		0.364949	0.328917	47.0223	0.0212665	0.0821462	5.15672e-07	0.000484473	0.0823885	0.0503143		-0.083143	0	46.5403	0.0214867
						-0.21704	0.32846	46.9286	0.021309	0.0813244	3.62332e-07	0.000477858	0.0815633	0.0358423		0	0.32846	46.8741	0.0213338	0.0735496	2.17606e-07	0.00045683	0.073778	0.0225167		0.00819224	0.32846	46.8741	0.0213337	0.0735734	2.17733e-07	0.000456905	0.0738019	0.0225261		0.364788	0.32846	47.0211	0.021267	0.0826307	5.14059e-07	0.00048418	0.0828728	0.0501873		-0.0835998	0	46.5399	0.0214869
						-0.2169	0.328004	46.9278	0.0213093	0.0818023	3.62115e-07	0.000477583	0.0820411	0.0358414		0	0.328004	46.8736	0.021334	0.0740064	2.17606e-07	0.00045683	0.0742348	0.0225167		0.00818393	0.328004	46.8737	0.0213339	0.0740304	2.17733e-07	0.000456904	0.0742588	0.0225261		0.364627	0.328004	47.02	0.0212675	0.0831149	5.13749e-07	0.00048389	0.0833568	0.0501872		-0.0840566	0	46.5395	0.0214871
						-0.21676	0.327547	46.927	0.0213097	0.0822799	3.62818e-07	0.000477311	0.0825185	0.0359315		0	0.327547	46.8731	0.0213342	0.0744632	2.17606e-07	0.00045683	0.0746916	0.0225167		0.00817567	0.327547	46.8732	0.0213342	0.0744873	2.17732e-07	0.000456903	0.0747157	0.0225261		0.364468	0.327547	47.0189	0.0212681	0.0835988	5.13441e-07	0.000483603	0.0838406	0.0501868		-0.0845135	0	46.5391	0.0214873
						-0.216622	0.32709	46.9262	0.0213101	0.0827572	3.65148e-07	0.000477042	0.0829957	0.0361827		0	0.32709	46.8726	0.0213344	0.0749201	2.17606e-07	0.00045683	0.0751485	0.0225167		0.00816746	0.32709	46.8727	0.0213344	0.0749442	2.17732e-07	0.000456902	0.0751726	0.0225261		0.364309	0.32709	47.0177	0.0212686	0.0840824	5.13136e-07	0.00048332	0.084324	0.0501864		-0.0849703	0	46.5387	0.0214875
						-0.216485	0.326633	46.9254	0.0213104	0.0832342	3.68063e-07	0.000476776	0.0834726	0.0364918		0	0.326633	46.8721	0.0213346	0.0753769	2.1878e-07	0.00045683	0.0756053	0.0226381		0.00815931	0.326633	46.8722	0.0213346	0.0754011	2.19105e-07	0.000456902	0.0756295	0.0226682		0.364151	0.326633	47.0166	0.0212691	0.0845657	5.36292e-07	0.00048304	0.0848072	0.0524815		-0.0854271	0	46.5383	0.0214877
						-0.216348	0.326176	46.9246	0.0213108	0.083711	3.67848e-07	0.000476498	0.0839492	0.0364918		0	0.326176	46.8717	0.0213349	0.0758337	2.1878e-07	0.00045683	0.0760621	0.0226381		0.0081512	0.326176	46.8717	0.0213348	0.075858	2.19105e-07	0.000456901	0.0760864	0.0226682		0.363994	0.326176	47.0154	0.0212696	0.0850487	5.35965e-07	0.00048274	0.0852901	0.0524822		-0.085884	0	46.5379	0.0214879
						-0.216213	0.32572	46.9238	0.0213112	0.0841875	3.67598e-07	0.000476223	0.0844256	0.0364881		0	0.32572	46.8712	0.0213351	0.0762905	2.1878e-07	0.00045683	0.076519	0.0226381		0.00814315	0.32572	46.8713	0.021335	0.0763149	2.19104e-07	0.0004569	0.0765433	0.0226682		0.363838	0.32572	47.0142	0.0212702	0.0855315	5.35641e-07	0.000482443	0.0857727	0.0524826		-0.0863408	0	46.5374	0.0214881
						-0.216078	0.325263	46.923	0.0213115	0.0846637	3.65307e-07	0.000475951	0.0849017	0.0362814		0	0.325263	46.8707	0.0213353	0.0767474	2.1878e-07	0.00045683	0.0769758	0.0226381		0.00813514	0.325263	46.8708	0.0213353	0.0767718	2.19104e-07	0.000456899	0.0770002	0.0226682		0.363683	0.325263	47.0131	0.0212707	0.0860139	5.34864e-07	0.000482151	0.086255	0.0524383		-0.0867976	0	46.537	0.0214883
						-0.215945	0.324806	46.9222	0.0213119	0.0851397	3.6511e-07	0.000475681	0.0853775	0.0362823		0	0.324806	46.8702	0.0213355	0.0772042	2.1878e-07	0.00045683	0.0774326	0.0226381		0.00812719	0.324806	46.8703	0.0213355	0.0772287	2.19103e-07	0.000456898	0.0774571	0.0226682		0.363529	0.324806	47.0119	0.0212712	0.0864961	5.3241e-07	0.000481862	0.086737	0.052229		-0.0872545	0	46.5366	0.0214885
						-0.215812	0.324349	46.9214	0.0213123	0.0856153	3.64914e-07	0.000475415	0.085853	0.0362832		0	0.324349	46.8697	0.0213357	0.077661	2.1878e-07	0.00045683	0.0778894	0.0226381		0.0081193	0.324349	46.8698	0.0213357	0.0776856	2.19103e-07	0.000456897	0.077914	0.0226682		0.363376	0.324349	47.0107	0.0212718	0.0869779	5.32096e-07	0.000481576	0.0872187	0.0522292		-0.0877113	0	46.5361	0.0214887
						-0.21568	0.323892	46.9205	0.0213126	0.0860908	3.64719e-07	0.000475152	0.0863283	0.0362838		0	0.323892	46.8693	0.0213359	0.0781179	2.1878e-07	0.00045683	0.0783463	0.0226381		0.00811145	0.323892	46.8693	0.0213359	0.0781425	2.19051e-07	0.000456896	0.0783709	0.0226629		0.363223	0.323892	47.0095	0.0212723	0.0874595	5.31785e-07	0.000481294	0.0877002	0.0522292		-0.0881681	0	46.5357	0.0214889
						-0.21555	0.323435	46.9197	0.021313	0.0865659	3.64525e-07	0.000474892	0.0868034	0.0362844		0	0.323435	46.8688	0.0213362	0.0785747	2.1878e-07	0.00045683	0.0788031	0.0226381		0.00810366	0.323435	46.8689	0.0213361	0.0785994	2.18902e-07	0.000456895	0.0788278	0.0226476		0.363072	0.323435	47.0083	0.0212728	0.0879408	5.31476e-07	0.000481016	0.0881813	0.0522291		-0.0886249	0	46.5352	0.0214891
						-0.21542	0.322979	46.9189	0.0213134	0.0870408	3.64331e-07	0.000474635	0.0872781	0.0362848		0	0.322979	46.8683	0.0213364	0.0790315	2.1878e-07	0.00045683	0.0792599	0.0226381		0.00809592	0.322979	46.8684	0.0213364	0.0790562	2.18902e-07	0.000456894	0.0792847	0.0226476		0.362921	0.322979	47.0072	0.0212734	0.0884218	5.31169e-07	0.000480741	0.0886622	0.0522287		-0.0890818	0	46.5348	0.0214893
						-0.215291	0.322522	46.9181	0.0213137	0.0875154	3.64139e-07	0.000474381	0.0877526	0.0362851		0	0.322522	46.8678	0.0213366	0.0794884	2.1878e-07	0.00045683	0.0797168	0.0226381		0.00808822	0.322522	46.8679	0.0213366	0.0795131	2.18902e-07	0.000456893	0.0797416	0.0226476		0.362772	0.322522	47.006	0.0212739	0.0889026	5.30864e-07	0.000480469	0.0891428	0.0522283		-0.0895386	0	46.5344	0.0214895
						-0.215163	0.322065	46.9173	0.0213141	0.0879898	3.63948e-07	0.00047413	0.0882269	0.0362852		0	0.322065	46.8673	0.0213368	0.0799452	2.1878e-07	0.00045683	0.0801736	0.0226381		0.00808059	0.322065	46.8674	0.0213368	0.07997	2.18901e-07	0.000456893	0.0801985	0.0226476		0.362623	0.322065	47.0048	0.0212744	0.089383	5.30561e-07	0.000480201	0.0896231	0.0522277		-0.0899954	0	46.5339	0.0214897
						-0.215036	0.321608	46.9165	0.0213144	0.0884639	3.66489e-07	0.000473882	0.0887009	0.0365577		0	0.321608	46.8669	0.021337	0.080402	2.20154e-07	0.00045683	0.0806304	0.0227803		0.008073	0.321608	46.8669	0.021337	0.0804269	2.20484e-07	0.000456892	0.0806554	0.0228114		0.362475	0.321608	47.0037	0.0212749	0.0898632	5.55325e-07	0.000479936	0.0901032	0.0546955		-0.0904523	0	46.5335	0.0214899
						-0.21491	0.321151	46.9157	0.0213148	0.0889378	3.66289e-07	0.000473623	0.0891746	0.0365577		0	0.321151	46.8664	0.0213373	0.0808588	2.20154e-07	0.00045683	0.0810873	0.0227803		0.00806546	0.321151	46.8664	0.0213372	0.0808838	2.20484e-07	0.000456891	0.0811123	0.0228114		0.362328	0.321151	47.0024	0.0212755	0.0903432	5.5212e-07	0.000479652	0.090583	0.054412		-0.0909091	0	46.533	0.0214901
						-0.214785	0.320694	46.9149	0.0213152	0.0894115	3.6609e-07	0.000473368	0.0896481	0.0365576		0	0.320694	46.8659	0.0213375	0.0813157	2.20154e-07	0.00045683	0.0815441	0.0227803		0.00805798	0.320694	46.866	0.0213374	0.0813407	2.20483e-07	0.00045689	0.0815692	0.0228114		0.362181	0.320694	47.0012	0.0212761	0.0908228	5.51474e-07	0.000479372	0.0910625	0.0543802		-0.0913659	0	46.5326	0.0214903
						-0.214661	0.320238	46.9141	0.0213155	0.0898848	3.69384e-07	0.000473115	0.0901214	0.0369062		0	0.320238	46.8654	0.0213377	0.0817725	2.20154e-07	0.00045683	0.0820009	0.0227803		0.00805054	0.320238	46.8655	0.0213377	0.0817976	2.20483e-07	0.000456889	0.082026	0.0228114		0.362036	0.320238	47	0.0212766	0.0913022	5.5116e-07	0.000479095	0.0915417	0.0543806		-0.0918228	0	46.5321	0.0214905
						-0.214538	0.319781	46.9133	0.0213159	0.0903579	3.69792e-07	0.000472865	0.0905944	0.0369665		0	0.319781	46.8649	0.0213379	0.0822293	2.20154e-07	0.00045683	0.0824577	0.0227803		0.00804317	0.319781	46.865	0.0213379	0.0822545	2.20483e-07	0.000456888	0.0824829	0.0228114		0.361892	0.319781	46.9988	0.0212772	0.0917813	5.50704e-07	0.000478822	0.0920207	0.0543666		-0.0922796	0	46.5316	0.0214908
						-0.214416	0.319324	46.9125	0.0213163	0.0908308	3.69608e-07	0.000472619	0.0910671	0.0369673		0	0.319324	46.8644	0.0213381	0.0826862	2.20154e-07	0.00045683	0.0829146	0.0227803		0.00803584	0.319324	46.8645	0.0213381	0.0827114	2.20482e-07	0.000456887	0.0829398	0.0228114		0.361748	0.319324	46.9976	0.0212777	0.0922601	5.50202e-07	0.000478553	0.0924994	0.0543475		-0.0927364	0	46.5311	0.021491
						-0.214295	0.318867	46.9117	0.0213167	0.0913034	3.69424e-07	0.000472375	0.0915396	0.036968		0	0.318867	46.864	0.0213384	0.083143	2.20154e-07	0.00045683	0.0833714	0.0227803		0.00802857	0.318867	46.864	0.0213383	0.0831683	2.20391e-07	0.000456887	0.0833967	0.022802		0.361606	0.318867	46.9963	0.0212783	0.0927387	5.49899e-07	0.00047829	0.0929778	0.0543475		-0.0931932	0	46.5307	0.0214912
						-0.214175	0.31841	46.9109	0.021317	0.0917758	3.69242e-07	0.000472135	0.0920119	0.0369686		0	0.31841	46.8635	0.0213386	0.0835998	2.20154e-07	0.00045683	0.0838282	0.0227803		0.00802135	0.31841	46.8635	0.0213386	0.0836252	2.20272e-07	0.000456886	0.0838536	0.0227898		0.361464	0.31841	46.9951	0.0212788	0.093217	5.49598e-07	0.000478029	0.093456	0.0543474		-0.0936501	0	46.5302	0.0214914
						-0.214056	0.317953	46.9101	0.0213174	0.0922479	3.6906e-07	0.000471897	0.0924839	0.036969		0	0.317953	46.863	0.0213388	0.0840566	2.20154e-07	0.00045683	0.0842851	0.0227803		0.00801418	0.317953	46.8631	0.0213388	0.084082	2.20272e-07	0.000456885	0.0843105	0.0227898		0.361323	0.317953	46.9939	0.0212794	0.093695	5.493e-07	0.000477773	0.0939339	0.0543471		-0.0941069	0	46.5297	0.0214916
						-0.213937	0.317497	46.9092	0.0213178	0.0927198	3.68879e-07	0.000471663	0.0929557	0.0369693		0	0.317497	46.8625	0.021339	0.0845135	2.20154e-07	0.00045683	0.0847419	0.0227803		0.00800706	0.317497	46.8626	0.021339	0.0845389	2.20271e-07	0.000456884	0.0847674	0.0227898		0.361183	0.317497	46.9927	0.0212799	0.0941728	5.47083e-07	0.000477519	0.0944115	0.0541565		-0.0945637	0	46.5293	0.0214919
						-0.21382	0.31704	46.9084	0.0213181	0.0931915	3.68699e-07	0.000471431	0.0934272	0.0369694		0	0.31704	46.862	0.0213392	0.0849703	2.20154e-07	0.00045683	0.0851987	0.0227803		0.008	0.31704	46.8621	0.0213392	0.0849958	2.20271e-07	0.000456883	0.0852242	0.0227898		0.361044	0.31704	46.9915	0.0212805	0.0946503	5.44996e-07	0.000477269	0.0948889	0.0539782		-0.0950206	0	46.5288	0.0214921
						-0.213704	0.316583	46.9076	0.0213185	0.0936629	3.71112e-07	0.000471202	0.0938985	0.0372294		0	0.316583	46.8615	0.0213395	0.0854271	2.21694e-07	0.00045683	0.0856556	0.0229397		0.00799298	0.316583	46.8616	0.0213394	0.0854527	2.2203e-07	0.000456883	0.0856811	0.0229718		0.360906	0.316583	46.9903	0.021281	0.0951275	5.71364e-07	0.000477021	0.0953661	0.0566191		-0.0954774	0	46.5283	0.0214923
						-0.213588	0.316126	46.9068	0.0213189	0.0941341	3.70924e-07	0.000470963	0.0943696	0.0372294		0	0.316126	46.861	0.0213397	0.085884	2.21694e-07	0.00045683	0.0861124	0.0229397		0.00798602	0.316126	46.8611	0.0213397	0.0859096	2.2203e-07	0.000456882	0.086138	0.0229718		0.360769	0.316126	46.989	0.0212816	0.0956046	5.71055e-07	0.000476756	0.0958429	0.0566199		-0.0959342	0	46.5278	0.0214925
						-0.213474	0.315669	46.906	0.0213192	0.0946051	3.70737e-07	0.000470728	0.0948405	0.0372292		0	0.315669	46.8606	0.0213399	0.0863408	2.21694e-07	0.00045683	0.0865692	0.0229397		0.00797911	0.315669	46.8606	0.0213399	0.0863665	2.22029e-07	0.000456881	0.0865949	0.0229718		0.360633	0.315669	46.9878	0.0212821	0.0960813	5.70748e-07	0.000476495	0.0963196	0.0566205		-0.096391	0	46.5273	0.0214927
						-0.21336	0.315212	46.9052	0.0213196	0.0950758	3.70551e-07	0.000470496	0.0953111	0.0372289		0	0.315212	46.8601	0.0213401	0.0867976	2.21694e-07	0.00045683	0.087026	0.0229397		0.00797226	0.315212	46.8601	0.0213401	0.0868233	2.22029e-07	0.00045688	0.0870518	0.0229718		0.360497	0.315212	46.9865	0.0212827	0.0965578	5.70443e-07	0.000476237	0.0967959	0.056621		-0.0968479	0	46.5268	0.021493
						-0.213248	0.314756	46.9044	0.02132	0.0955463	3.70366e-07	0.000470266	0.0957814	0.0372285		0	0.314756	46.8596	0.0213404	0.0872545	2.21694e-07	0.00045683	0.0874829	0.0229397		0.00796546	0.314756	46.8597	0.0213403	0.0872802	2.22029e-07	0.000456879	0.0875087	0.0229718		0.360363	0.314756	46.9852	0.0212833	0.0970341	5.70141e-07	0.000475983	0.097272	0.0566212		-0.0973047	0	46.5263	0.0214932
						-0.213136	0.314299	46.9035	0.0213204	0.0960166	3.70182e-07	0.00047004	0.0962516	0.0372279		0	0.314299	46.8591	0.0213406	0.0877113	2.21694e-07	0.00045683	0.0879397	0.0229397		0.00795871	0.314299	46.8592	0.0213405	0.0877371	2.22028e-07	0.000456879	0.0879655	0.0229718		0.360229	0.314299	46.984	0.0212838	0.09751	5.69841e-07	0.000475732	0.0977479	0.0566213		-0.0977615	0	46.5258	0.0214934
						-0.213025	0.313842	46.9027	0.0213207	0.0964866	3.70428e-07	0.000469816	0.0967215	0.0372704		0	0.313842	46.8586	0.0213408	0.0881681	2.21694e-07	0.00045683	0.0883965	0.0229397		0.00795201	0.313842	46.8587	0.0213408	0.088194	2.21897e-07	0.000456878	0.0884224	0.0229583		0.360096	0.313842	46.9827	0.0212844	0.0979858	5.69413e-07	0.000475484	0.0982235	0.0566081		-0.0982184	0	46.5253	0.0214937
						-0.212916	0.313385	46.9019	0.0213211	0.0969564	3.74356e-07	0.000469596	0.0971912	0.0376832		0	0.313385	46.8581	0.021341	0.0886249	2.21694e-07	0.00045683	0.0888534	0.0229397		0.00794537	0.313385	46.8582	0.021341	0.0886509	2.21809e-07	0.000456877	0.0888793	0.0229492		0.359964	0.313385	46.9815	0.021285	0.0984613	5.64855e-07	0.00047524	0.0986989	0.0561839		-0.0986752	0	46.5248	0.0214939
						-0.212807	0.312928	46.9011	0.0213215	0.097426	3.74186e-07	0.000469378	0.0976607	0.0376836		0	0.312928	46.8576	0.0213412	0.0890818	2.21694e-07	0.00045683	0.0893102	0.0229397		0.00793878	0.312928	46.8577	0.0213412	0.0891077	2.21809e-07	0.000456876	0.0893362	0.0229492		0.359833	0.312928	46.9802	0.0212856	0.0989365	5.64568e-07	0.000474999	0.099174	0.0561839		-0.099132	0	46.5243	0.0214941
						-0.212699	0.312471	46.9003	0.0213218	0.0978954	3.74018e-07	0.000469163	0.09813	0.0376839		0	0.312471	46.8572	0.0213415	0.0895386	2.21694e-07	0.00045683	0.089767	0.0229397		0.00793224	0.312471	46.8572	0.0213414	0.0895646	2.21808e-07	0.000456876	0.089793	0.0229492		0.359703	0.312471	46.979	0.0212861	0.0994115	5.64284e-07	0.000474762	0.0996489	0.0561836		-0.0995889	0	46.5238	0.0214944
						-0.212592	0.312015	46.8994	0.0213222	0.0983646	3.7385e-07	0.000468951	0.098599	0.0376841		0	0.312015	46.8567	0.0213417	0.0899954	2.21694e-07	0.00045683	0.0902238	0.0229397		0.00792575	0.312015	46.8567	0.0213417	0.0900215	2.21808e-07	0.000456875	0.0902499	0.0229492		0.359574	0.312015	46.9777	0.0212867	0.0998863	5.64001e-07	0.000474527	0.100124	0.0561832		-0.100046	0	46.5233	0.0214946
						-0.212486	0.311558	46.8986	0.0213226	0.0988335	3.76103e-07	0.000468742	0.0990679	0.0379281		0	0.311558	46.8562	0.0213419	0.0904523	2.2337e-07	0.00045683	0.0906807	0.0231131		0.00791932	0.311558	46.8562	0.0213419	0.0904784	2.23712e-07	0.000456874	0.0907068	0.0231462		0.359445	0.311558	46.9765	0.0212872	0.100361	5.92171e-07	0.000474296	0.100598	0.0590182		-0.100503	0	46.5228	0.0214948
						-0.212381	0.311101	46.8978	0.021323	0.0993023	3.75928e-07	0.000468524	0.0995365	0.0379281		0	0.311101	46.8557	0.0213421	0.0909091	2.2337e-07	0.00045683	0.0911375	0.0231131		0.00791293	0.311101	46.8558	0.0213421	0.0909352	2.23711e-07	0.000456873	0.0911637	0.0231462		0.359318	0.311101	46.9752	0.0212878	0.100835	5.91868e-07	0.000474048	0.101072	0.0590189		-0.100959	0	46.5223	0.0214951
						-0.212277	0.310644	46.897	0.0213233	0.0997708	3.75754e-07	0.000468309	0.100005	0.0379279		0	0.310644	46.8552	0.0213423	0.0913659	2.2337e-07	0.00045683	0.0915943	0.0231131		0.0079066	0.310644	46.8553	0.0213423	0.0913921	2.23711e-07	0.000456873	0.0916205	0.0231462		0.359191	0.310644	46.9739	0.0212884	0.101309	5.91568e-07	0.000473803	0.101546	0.0590193		-0.101416	0	46.5217	0.0214953
						-0.212174	0.310187	46.8961	0.0213237	0.100239	3.7558e-07	0.000468098	0.100473	0.0379275		0	0.310187	46.8547	0.0213426	0.0918228	2.2337e-07	0.00045683	0.0920512	0.0231131		0.00790033	0.310187	46.8548	0.0213425	0.091849	2.23711e-07	0.000456872	0.0920774	0.0231462		0.359066	0.310187	46.9726	0.021289	0.101783	5.91269e-07	0.000473562	0.10202	0.0590196		-0.101873	0	46.5212	0.0214956
						-0.212072	0.30973	46.8953	0.0213241	0.100707	3.75408e-07	0.000467889	0.100941	0.037927		0	0.30973	46.8542	0.0213428	0.0922796	2.2337e-07	0.00045683	0.092508	0.0231131		0.0078941	0.30973	46.8543	0.0213428	0.0923058	2.2371e-07	0.000456871	0.0925343	0.0231462		0.358941	0.30973	46.9713	0.0212896	0.102256	5.88758e-07	0.000473325	0.102493	0.0587984		-0.10233	0	46.5207	0.0214958
						-0.211971	0.309274	46.8945	0.0213245	0.101175	3.75236e-07	0.000467683	0.101409	0.0379264		0	0.309274	46.8537	0.021343	0.0927364	2.2337e-07	0.00045683	0.0929648	0.0231131		0.00788793	0.309274	46.8538	0.021343	0.0927627	2.2371e-07	0.000456871	0.0929912	0.0231462		0.358817	0.309274	46.97	0.0212902	0.10273	5.85563e-07	0.000473091	0.102966	0.0585083		-0.102787	0	46.5201	0.0214961
						-0.211871	0.308817	46.8937	0.0213248	0.101643	3.75065e-07	0.00046748	0.101877	0.0379256		0	0.308817	46.8532	0.0213432	0.0931932	2.2337e-07	0.00045683	0.0934217	0.0231131		0.00788182	0.308817	46.8533	0.0213432	0.0932196	2.23539e-07	0.00045687	0.093448	0.0231285		0.358694	0.308817	46.9687	0.0212908	0.103203	5.8528e-07	0.00047286	0.103439	0.0585085		-0.103243	0	46.5196	0.0214963
						-0.211771	0.30836	46.8928	0.0213252	0.10211	3.74895e-07	0.00046728	0.102344	0.0379246		0	0.30836	46.8527	0.0213435	0.0936501	2.2337e-07	0.00045683	0.0938785	0.0231131		0.00787575	0.30836	46.8528	0.0213434	0.0936765	2.23481e-07	0.000456869	0.0939049	0.0231226		0.358572	0.30836	46.9674	0.0212914	0.103676	5.84998e-07	0.000472632	0.103912	0.0585085		-0.1037	0	46.5191	0.0214966
						-0.211673	0.307903	46.892	0.0213256	0.102578	3.74726e-07	0.000467082	0.102811	0.0379235		0	0.307903	46.8523	0.0213437	0.0941069	2.2337e-07	0.00045683	0.0943353	0.0231131		0.00786974	0.307903	46.8523	0.0213437	0.0941333	2.23481e-07	0.000456868	0.0943618	0.0231226		0.358451	0.307903	46.9661	0.021292	0.104148	5.84719e-07	0.000472408	0.104385	0.0585083		-0.104157	0	46.5185	0.0214968
						-0.211576	0.307446	46.8912	0.021326	0.103045	3.74558e-07	0.000466887	0.103278	0.0379223		0	0.307446	46.8518	0.0213439	0.0945637	2.2337e-07	0.00045683	0.0947921	0.0231131		0.00786378	0.307446	46.8518	0.0213439	0.0945902	2.23481e-07	0.000456868	0.0948186	0.0231226		0.35833	0.307446	46.9648	0.0212925	0.104621	5.84441e-07	0.000472187	0.104857	0.058508		-0.104614	0	46.518	0.0214971
						-0.21148	0.306989	46.8904	0.0213263	0.103511	3.7895e-07	0.000466695	0.103745	0.0383828		0	0.306989	46.8513	0.0213441	0.0950206	2.2337e-07	0.00045683	0.095249	0.0231131		0.00785788	0.306989	46.8513	0.0213441	0.0950471	2.2348e-07	0.000456867	0.0952755	0.0231226		0.358211	0.306989	46.9635	0.0212931	0.105093	5.84166e-07	0.000471969	0.105329	0.0585074		-0.105071	0	46.5175	0.0214973
						-0.211384	0.306533	46.8895	0.0213267	0.103978	3.81463e-07	0.000466506	0.104211	0.038653		0	0.306533	46.8508	0.0213444	0.0954774	2.25152e-07	0.00045683	0.0957058	0.0232975		0.00785202	0.306533	46.8508	0.0213443	0.0955039	2.25499e-07	0.000456866	0.0957324	0.0233315		0.358092	0.306533	46.9622	0.0212937	0.105565	6.14262e-07	0.000471754	0.105801	0.0615498		-0.105528	0	46.5169	0.0214976
						-0.21129	0.306076	46.8887	0.0213271	0.104445	3.81302e-07	0.000466309	0.104678	0.038653		0	0.306076	46.8503	0.0213446	0.0959342	2.25152e-07	0.00045683	0.0961626	0.0232975		0.00784622	0.306076	46.8504	0.0213446	0.0959608	2.25499e-07	0.000456866	0.0961892	0.0233315		0.357975	0.306076	46.9609	0.0212943	0.106037	6.13967e-07	0.000471523	0.106272	0.0615503		-0.105984	0	46.5163	0.0214978
						-0.211196	0.305619	46.8879	0.0213275	0.104911	3.81141e-07	0.000466116	0.105144	0.0386527		0	0.305619	46.8498	0.0213448	0.096391	2.25152e-07	0.00045683	0.0966195	0.0232975		0.00784047	0.305619	46.8499	0.0213448	0.0964177	2.25498e-07	0.000456865	0.0966461	0.0233315		0.357858	0.305619	46.9595	0.0212949	0.106508	6.09423e-07	0.000471296	0.106744	0.0611242		-0.106441	0	46.5158	0.0214981
						-0.211103	0.305162	46.887	0.0213279	0.105377	3.802e-07	0.000465925	0.10561	0.0385731		0	0.305162	46.8493	0.021345	0.0968479	2.25152e-07	0.00045683	0.0970763	0.0232975		0.00783477	0.305162	46.8494	0.021345	0.0968745	2.25498e-07	0.000456864	0.097103	0.0233315		0.357742	0.305162	46.9582	0.0212955	0.10698	6.07489e-07	0.000471072	0.107215	0.0609591		-0.106898	0	46.5152	0.0214983
						-0.211012	0.304705	46.8862	0.0213282	0.105843	3.79193e-07	0.000465737	0.106076	0.0384865		0	0.304705	46.8488	0.0213453	0.0973047	2.25152e-07	0.00045683	0.0975331	0.0232975		0.00782913	0.304705	46.8489	0.0213452	0.0973314	2.25498e-07	0.000456864	0.0975598	0.0233315		0.357627	0.304705	46.9568	0.0212962	0.107451	6.0721e-07	0.000470852	0.107686	0.0609596		-0.107355	0	46.5146	0.0214986
						-0.210921	0.304249	46.8853	0.0213286	0.106309	3.79052e-07	0.000465551	0.106542	0.0384875		0	0.304249	46.8483	0.0213455	0.0977615	2.25152e-07	0.00045683	0.0979899	0.0232975		0.00782354	0.304249	46.8484	0.0213455	0.0977883	2.25497e-07	0.000456863	0.0980167	0.0233315		0.357513	0.304249	46.9555	0.0212968	0.107921	6.06933e-07	0.000470635	0.108157	0.0609599		-0.107812	0	46.5141	0.0214989
						-0.210831	0.303792	46.8845	0.021329	0.106774	3.78912e-07	0.000465369	0.107007	0.0384883		0	0.303792	46.8478	0.0213457	0.0982184	2.25152e-07	0.00045683	0.0984468	0.0232975		0.00781801	0.303792	46.8479	0.0213457	0.0982451	2.25286e-07	0.000456863	0.0984736	0.0233097		0.3574	0.303792	46.9542	0.0212974	0.108392	6.06658e-07	0.000470422	0.108627	0.06096		-0.108269	0	46.5135	0.0214991
						-0.210743	0.303335	46.8837	0.0213294	0.10724	3.78772e-07	0.000465189	0.107472	0.038489		0	0.303335	46.8473	0.0213459	0.0986752	2.25152e-07	0.00045683	0.0989036	0.0232975		0.00781252	0.303335	46.8474	0.0213459	0.098702	2.2526e-07	0.000456862	0.0989304	0.023307		0.357288	0.303335	46.9528	0.021298	0.108863	6.06385e-07	0.000470211	0.109098	0.0609599		-0.108725	0	46.5129	0.0214994
						-0.210655	0.302878	46.8828	0.0213298	0.107705	3.78632e-07	0.000465012	0.107937	0.0384895		0	0.302878	46.8468	0.0213462	0.099132	2.25152e-07	0.00045683	0.0993604	0.0232975		0.00780709	0.302878	46.8469	0.0213461	0.0991588	2.25259e-07	0.000456861	0.0993873	0.023307		0.357176	0.302878	46.9515	0.0212986	0.109333	6.06115e-07	0.000470004	0.109568	0.0609595		-0.109182	0	46.5123	0.0214997
						-0.210568	0.302421	46.882	0.0213301	0.10817	3.78494e-07	0.000464837	0.108402	0.0384898		0	0.302421	46.8463	0.0213464	0.0995889	2.25152e-07	0.00045683	0.0998173	0.0232975		0.00780171	0.302421	46.8464	0.0213464	0.0996157	2.25259e-07	0.000456861	0.0998441	0.023307		0.357066	0.302421	46.9501	0.0212992	0.109803	6.05846e-07	0.000469799	0.110038	0.060959		-0.109639	0	46.5118	0.0214999
						-0.210482	0.301964	46.8812	0.0213305	0.108635	3.78356e-07	0.000464665	0.108867	0.03849		0	0.301964	46.8458	0.0213466	0.100046	2.25152e-07	0.00045683	0.100274	0.0232975		0.00779639	0.301964	46.8459	0.0213466	0.100073	2.25259e-07	0.00045686	0.100301	0.023307		0.356956	0.301964	46.9488	0.0212998	0.110273	6.05579e-07	0.000469598	0.110507	0.0609583		-0.110096	0	46.5112	0.0215002
						-0.210397	0.301508	46.8804	0.0213309	0.109099	3.79945e-07	0.000464496	0.109332	0.0386658		0	0.301508	46.8454	0.0213468	0.100503	2.27011e-07	0.00045683	0.100731	0.0234899		0.00779111	0.301508	46.8454	0.0213468	0.100529	2.27364e-07	0.000456859	0.100758	0.0235249		0.356847	0.301508	46.9475	0.0213004	0.110742	6.31797e-07	0.0004694	0.110977	0.0636242		-0.110553	0	46.5106	0.0215005
						-0.210313	0.301051	46.8795	0.0213313	0.109564	3.81152e-07	0.000464321	0.109796	0.0388033		0	0.301051	46.8449	0.0213471	0.100959	2.27011e-07	0.00045683	0.101188	0.0234899		0.00778589	0.301051	46.8449	0.021347	0.100986	2.27364e-07	0.000456859	0.101215	0.0235249		0.356739	0.301051	46.9461	0.021301	0.111212	6.30829e-07	0.000469188	0.111446	0.0635554		-0.11101	0	46.51	0.0215007
						-0.21023	0.300594	46.8787	0.0213317	0.110028	3.8538e-07	0.000464148	0.11026	0.0392483		0	0.300594	46.8444	0.0213473	0.101416	2.27011e-07	0.00045683	0.101645	0.0234899		0.00778072	0.300594	46.8444	0.0213473	0.101443	2.27364e-07	0.000456858	0.101672	0.0235249		0.356632	0.300594	46.9447	0.0213017	0.111681	6.30557e-07	0.00046898	0.111915	0.0635562		-0.111466	0	46.5094	0.021501
						-0.210148	0.300137	46.8778	0.021332	0.110492	3.85253e-07	0.000463978	0.110724	0.0392497		0	0.300137	46.8439	0.0213475	0.101873	2.27011e-07	0.00045683	0.102101	0.0234899		0.00777561	0.300137	46.8439	0.0213475	0.1019	2.27363e-07	0.000456858	0.102128	0.0235249		0.356526	0.300137	46.9433	0.0213023	0.11215	6.30287e-07	0.000468776	0.112384	0.0635567		-0.111923	0	46.5088	0.0215013
						-0.210067	0.29968	46.877	0.0213324	0.110956	3.85126e-07	0.000463811	0.111188	0.0392509		0	0.29968	46.8434	0.0213477	0.10233	2.27011e-07	0.00045683	0.102558	0.0234899		0.00777055	0.29968	46.8434	0.0213477	0.102357	2.27363e-07	0.000456857	0.102585	0.0235249		0.356421	0.29968	46.9419	0.0213029	0.112618	6.3002e-07	0.000468575	0.112853	0.063557		-0.11238	0	46.5082	0.0215016
						-0.209987	0.299223	46.8761	0.0213328	0.11142	3.84999e-07	0.000463647	0.111652	0.0392519		0	0.299223	46.8429	0.021348	0.102787	2.27011e-07	0.00045683	0.103015	0.0234899		0.00776554	0.299223	46.8429	0.0213479	0.102814	2.2736e-07	0.000456856	0.103042	0.0235246		0.356317	0.299223	46.9405	0.0213036	0.113087	6.29754e-07	0.000468377	0.113321	0.0635571		-0.112837	0	46.5076	0.0215019
						-0.209907	0.298767	46.8753	0.0213332	0.111884	3.84873e-07	0.000463485	0.112116	0.0392527		0	0.298767	46.8424	0.0213482	0.103243	2.27011e-07	0.00045683	0.103472	0.0234899		0.00776058	0.298767	46.8424	0.0213482	0.103271	2.27116e-07	0.000456856	0.103499	0.0234994		0.356214	0.298767	46.9391	0.0213042	0.113555	6.29491e-07	0.000468182	0.11379	0.0635569		-0.113294	0	46.507	0.0215021
						-0.209829	0.29831	46.8744	0.0213336	0.112347	3.84748e-07	0.000463326	0.112579	0.0392534		0	0.29831	46.8419	0.0213484	0.1037	2.27011e-07	0.00045683	0.103929	0.0234899		0.00775568	0.29831	46.8419	0.0213484	0.103727	2.27116e-07	0.000456855	0.103956	0.0234994		0.356111	0.29831	46.9377	0.0213048	0.114024	6.2923e-07	0.00046799	0.114258	0.0635565		-0.113751	0	46.5064	0.0215024
						-0.209752	0.297853	46.8736	0.021334	0.112811	3.84623e-07	0.00046317	0.113042	0.039254		0	0.297853	46.8414	0.0213487	0.104157	2.27011e-07	0.00045683	0.104386	0.0234899		0.00775083	0.297853	46.8414	0.0213486	0.104184	2.27116e-07	0.000456855	0.104413	0.0234994		0.35601	0.297853	46.9364	0.0213054	0.114492	6.2897e-07	0.000467802	0.114725	0.063556		-0.114207	0	46.5058	0.0215027
						-0.209676	0.297396	46.8728	0.0213344	0.113274	3.84499e-07	0.000463016	0.113505	0.0392543		0	0.297396	46.8409	0.0213489	0.104614	2.27011e-07	0.00045683	0.104842	0.0234899		0.00774603	0.297396	46.8409	0.0213489	0.104641	2.27116e-07	0.000456854	0.10487	0.0234994		0.355909	0.297396	46.935	0.0213061	0.114959	6.22018e-07	0.000467616	0.115193	0.0628784		-0.114664	0	46.5052	0.021503
						-0.2096	0.296939	46.8719	0.0213347	0.113737	3.84376e-07	0.000462864	0.113968	0.0392545		0	0.296939	46.8404	0.0213491	0.105071	2.27011e-07	0.00045683	0.105299	0.0234899		0.00774128	0.296939	46.8404	0.0213491	0.105098	2.27115e-07	0.000456854	0.105326	0.0234994		0.355809	0.296939	46.9336	0.0213067	0.115427	6.21275e-07	0.000467433	0.115661	0.0628279		-0.115121	0	46.5046	0.0215033
						-0.209526	0.296482	46.8711	0.0213351	0.1142	3.85711e-07	0.000462716	0.114431	0.0394036		0	0.296482	46.8399	0.0213493	0.105528	2.28922e-07	0.00045683	0.105756	0.0236876		0.00773659	0.296482	46.8399	0.0213493	0.105555	2.29282e-07	0.000456853	0.105783	0.0237236		0.35571	0.296482	46.9322	0.0213073	0.115894	6.55282e-07	0.000467253	0.116128	0.0662924		-0.115578	0	46.504	0.0215035
						-0.209452	0.296026	46.8702	0.0213355	0.114662	3.85582e-07	0.000462562	0.114894	0.0394035		0	0.296026	46.8394	0.0213496	0.105984	2.28922e-07	0.00045683	0.106213	0.0236876		0.00773195	0.296026	46.8394	0.0213495	0.106012	2.29282e-07	0.000456853	0.10624	0.0237236		0.355612	0.296026	46.9308	0.021308	0.116362	6.5502e-07	0.00046706	0.116595	0.0662933		-1.16035
[truncated: 5 more columns]

## Sheet: Conductance Matrix
																				0.0212005	0.0212021	0.0212038	0.0212054	0.021207	0.0212087	0.0212103	0.021212	0.0212137	0.0212154	0.0212171	0.0212188	0.0212205	0.0212223	0.021224	0.0212258	0.0212275	0.0212293	0.0212311	0.0212328	0.0212346	0.0212364	0.0212382	0.0212399	0.0212417	0.0212434	0.0212452	0.0212469	0.0212486	0.0212504
																				0.021203	0.0212047	0.0212063	0.021208	0.0212096	0.0212113	0.021213	0.0212147	0.0212164	0.0212181	0.0212198	0.0212216	0.0212233	0.0212251	0.0212268	0.0212286	0.0212304	0.0212321	0.0212339	0.0212357	0.0212375	0.0212392	0.021241	0.0212428	0.0212445	0.0212463	0.021248	0.0212497	0.0212515	0.0212532
																				0.0212056	0.0212073	0.021209	0.0212107	0.0212124	0.0212141	0.0212158	0.0212175	0.0212192	0.021221	0.0212227	0.0212245	0.0212262	0.021228	0.0212297	0.0212315	0.0212333	0.0212351	0.0212368	0.0212386	0.0212404	0.0212422	0.0212439	0.0212457	0.0212474	0.0212492	0.0212509	0.0212526	0.0212544	0.0212561
																				0.0212084	0.0212101	0.0212118	0.0212135	0.0212152	0.021217	0.0212187	0.0212204	0.0212222	0.0212239	0.0212257	0.0212275	0.0212292	0.021231	0.0212328	0.0212345	0.0212363	0.0212381	0.0212399	0.0212416	0.0212434	0.0212452	0.0212469	0.0212487	0.0212504	0.0212522	0.0212539	0.0212556	0.0212573	0.021259
																				0.0212113	0.021213	0.0212148	0.0212165	0.0212183	0.02122	0.0212218	0.0212235	0.0212253	0.021227	0.0212288	0.0212306	0.0212323	0.0212341	0.0212359	0.0212377	0.0212394	0.0212412	0.021243	0.0212448	0.0212465	0.0212483	0.02125	0.0212518	0.0212535	0.0212552	0.021257	0.0212587	0.0212603	0.021262
																				0.0212143	0.0212161	0.0212178	0.0212196	0.0212214	0.0212232	0.0212249	0.0212267	0.0212285	0.0212303	0.021232	0.0212338	0.0212356	0.0212374	0.0212391	0.0212409	0.0212427	0.0212445	0.0212462	0.021248	0.0212497	0.0212515	0.0212532	0.021255	0.0212567	0.0212584	0.0212601	0.0212618	0.0212635	0.0212651
																				0.0212175	0.0212193	0.0212211	0.0212229	0.0212247	0.0212265	0.0212283	0.0212301	0.0212319	0.0212336	0.0212354	0.0212372	0.021239	0.0212408	0.0212425	0.0212443	0.0212461	0.0212478	0.0212496	0.0212513	0.0212531	0.0212548	0.0212565	0.0212582	0.0212599	0.0212616	0.0212633	0.021265	0.0212666	0.0212683
																				0.0212208	0.0212227	0.0212245	0.0212263	0.0212281	0.02123	0.0212318	0.0212336	0.0212354	0.0212372	0.021239	0.0212407	0.0212425	0.0212443	0.021246	0.0212478	0.0212496	0.0212513	0.0212531	0.0212548	0.0212565	0.0212582	0.0212599	0.0212616	0.0212633	0.021265	0.0212666	0.0212683	0.0212699	0.0212715
																				0.0212243	0.0212262	0.0212281	0.0212299	0.0212318	0.0212336	0.0212354	0.0212372	0.021239	0.0212408	0.0212426	0.0212444	0.0212462	0.021248	0.0212497	0.0212515	0.0212532	0.0212549	0.0212567	0.0212584	0.0212601	0.0212618	0.0212635	0.0212651	0.0212668	0.0212684	0.0212701	0.0212717	0.0212733	0.0212749
																				0.021228	0.0212299	0.0212318	0.0212337	0.0212356	0.0212374	0.0212392	0.0212411	0.0212429	0.0212447	0.0212465	0.0212482	0.02125	0.0212518	0.0212535	0.0212552	0.021257	0.0212587	0.0212604	0.0212621	0.0212638	0.0212654	0.0212671	0.0212687	0.0212704	0.021272	0.0212736	0.0212752	0.0212767	0.0212783
																				0.0212319	0.0212339	0.0212358	0.0212377	0.0212395	0.0212414	0.0212432	0.0212451	0.0212469	0.0212487	0.0212505	0.0212522	0.021254	0.0212557	0.0212575	0.0212592	0.0212609	0.0212626	0.0212643	0.0212659	0.0212676	0.0212692	0.0212709	0.0212725	0.0212741	0.0212757	0.0212772	0.0212788	0.0212803	0.0212818
																				0.021236	0.021238	0.0212399	0.0212418	0.0212437	0.0212456	0.0212474	0.0212493	0.0212511	0.0212529	0.0212547	0.0212564	0.0212582	0.0212599	0.0212616	0.0212633	0.021265	0.0212666	0.0212683	0.0212699	0.0212716	0.0212732	0.0212748	0.0212763	0.0212779	0.0212794	0.021281	0.0212825	0.021284	0.0212854
																				0.0212403	0.0212423	0.0212443	0.0212462	0.0212481	0.02125	0.0212518	0.0212537	0.0212555	0.0212573	0.021259	0.0212608	0.0212625	0.0212642	0.0212659	0.0212676	0.0212692	0.0212709	0.0212725	0.0212741	0.0212757	0.0212772	0.0212788	0.0212803	0.0212818	0.0212833	0.0212848	0.0212863	0.0212877	0.0212892
																				0.0212449	0.0212469	0.0212488	0.0212508	0.0212527	0.0212546	0.0212564	0.0212583	0.0212601	0.0212618	0.0212636	0.0212653	0.021267	0.0212687	0.0212704	0.021272	0.0212736	0.0212752	0.0212768	0.0212784	0.0212799	0.0212814	0.021283	0.0212845	0.0212859	0.0212874	0.0212888	0.0212902	0.0212916	0.021293
																				0.0212496	0.0212517	0.0212536	0.0212556	0.0212575	0.0212594	0.0212613	0.0212631	0.0212649	0.0212666	0.0212684	0.0212701	0.0212717	0.0212734	0.021275	0.0212766	0.0212782	0.0212798	0.0212813	0.0212828	0.0212843	0.0212858	0.0212873	0.0212887	0.0212901	0.0212916	0.0212929	0.0212943	0.0212957	0.021297
																				0.0212546	0.0212567	0.0212587	0.0212607	0.0212626	0.0212645	0.0212663	0.0212681	0.0212699	0.0212716	0.0212734	0.021275	0.0212767	0.0212783	0.0212799	0.0212814	0.021283	0.0212845	0.021286	0.0212875	0.0212889	0.0212903	0.0212918	0.0212931	0.0212945	0.0212959	0.0212972	0.0212985	0.0212998	0.0213011
																				0.0212599	0.021262	0.021264	0.021266	0.0212679	0.0212698	0.0212716	0.0212734	0.0212752	0.0212769	0.0212786	0.0212802	0.0212818	0.0212834	0.0212849	0.0212865	0.0212879	0.0212894	0.0212909	0.0212923	0.0212937	0.021295	0.0212964	0.0212977	0.021299	0.0213003	0.0213016	0.0213028	0.0213041	0.0213053
																				0.0212655	0.0212676	0.0212696	0.0212716	0.0212735	0.0212754	0.0212772	0.021279	0.0212807	0.0212824	0.021284	0.0212856	0.0212872	0.0212887	0.0212902	0.0212917	0.0212931	0.0212945	0.0212959	0.0212973	0.0212986	0.0212999	0.0213012	0.0213024	0.0213037	0.0213049	0.0213061	0.0213073	0.0213085	0.0213096
																				0.0212714	0.0212735	0.0212755	0.0212775	0.0212794	0.0212812	0.021283	0.0212848	0.0212865	0.0212881	0.0212897	0.0212913	0.0212928	0.0212943	0.0212957	0.0212971	0.0212985	0.0212998	0.0213011	0.0213024	0.0213037	0.0213049	0.0213061	0.0213073	0.0213085	0.0213097	0.0213108	0.0213119	0.021313	0.0213141
																				0.0212776	0.0212797	0.0212817	0.0212837	0.0212856	0.0212874	0.0212892	0.0212909	0.0212925	0.0212941	0.0212957	0.0212972	0.0212986	0.0213001	0.0213014	0.0213028	0.0213041	0.0213054	0.0213066	0.0213078	0.021309	0.0213102	0.0213113	0.0213124	0.0213135	0.0213146	0.0213156	0.0213167	0.0213177	0.0213187
																				0.0212841	0.0212862	0.0212882	0.0212902	0.0212921	0.0212939	0.0212956	0.0212973	0.0212989	0.0213004	0.0213019	0.0213034	0.0213047	0.0213061	0.0213074	0.0213087	0.0213099	0.0213111	0.0213123	0.0213134	0.0213145	0.0213156	0.0213166	0.0213177	0.0213187	0.0213196	0.0213206	0.0213216	0.0213225	0.0213234
																				0.021291	0.0212931	0.0212951	0.021297	0.0212989	0.0213007	0.0213023	0.021304	0.0213055	0.021307	0.0213084	0.0213098	0.0213111	0.0213124	0.0213136	0.0213148	0.021316	0.0213171	0.0213181	0.0213192	0.0213202	0.0213212	0.0213221	0.0213231	0.021324	0.0213249	0.0213258	0.0213266	0.0213274	0.0213283
																				0.0212983	0.0213004	0.0213024	0.0213043	0.0213061	0.0213078	0.0213094	0.021311	0.0213125	0.0213139	0.0213153	0.0213166	0.0213178	0.021319	0.0213201	0.0213212	0.0213223	0.0213233	0.0213243	0.0213252	0.0213261	0.021327	0.0213279	0.0213287	0.0213295	0.0213303	0.0213311	0.0213318	0.0213326	0.0213333
																				0.0213059	0.021308	0.02131	0.0213119	0.0213136	0.0213153	0.0213169	0.0213184	0.0213198	0.0213211	0.0213224	0.0213236	0.0213248	0.0213258	0.0213269	0.0213279	0.0213288	0.0213297	0.0213306	0.0213314	0.0213322	0.021333	0.0213338	0.0213345	0.0213352	0.0213359	0.0213366	0.0213372	0.0213378	0.0213385
																				0.021314	0.0213161	0.021318	0.0213199	0.0213216	0.0213232	0.0213247	0.0213261	0.0213275	0.0213287	0.0213299	0.021331	0.021332	0.021333	0.0213339	0.0213348	0.0213357	0.0213364	0.0213372	0.0213379	0.0213386	0.0213393	0.0213399	0.0213405	0.0213411	0.0213417	0.0213422	0.0213428	0.0213433	0.0213438
																				0.0213226	0.0213246	0.0213265	0.0213283	0.02133	0.0213315	0.0213329	0.0213343	0.0213355	0.0213366	0.0213377	0.0213387	0.0213396	0.0213405	0.0213413	0.0213421	0.0213428	0.0213434	0.0213441	0.0213446	0.0213452	0.0213457	0.0213462	0.0213467	0.0213472	0.0213476	0.0213481	0.0213485	0.0213489	0.0213493
																				0.0213316	0.0213336	0.0213355	0.0213372	0.0213388	0.0213402	0.0213416	0.0213428	0.0213439	0.021345	0.0213459	0.0213468	0.0213476	0.0213483	0.021349	0.0213496	0.0213502	0.0213507	0.0213512	0.0213516	0.021352	0.0213524	0.0213528	0.0213531	0.0213535	0.0213538	0.0213541	0.0213544	0.0213546	0.0213549
																				0.0213412	0.0213432	0.0213449	0.0213466	0.0213481	0.0213494	0.0213507	0.0213518	0.0213528	0.0213537	0.0213545	0.0213552	0.0213559	0.0213565	0.021357	0.0213574	0.0213579	0.0213582	0.0213586	0.0213589	0.0213591	0.0213594	0.0213596	0.0213598	0.02136	0.0213601	0.0213603	0.0213604	0.0213606	0.0213607
																				0.0213513	0.0213532	0.0213549	0.0213565	0.0213579	0.0213591	0.0213602	0.0213612	0.0213621	0.0213628	0.0213635	0.0213641	0.0213645	0.021365	0.0213653	0.0213656	0.0213659	0.0213661	0.0213662	0.0213664	0.0213665	0.0213665	0.0213666	0.0213666	0.0213667	0.0213667	0.0213667	0.0213667	0.0213667	0.0213667
																				0.0213621	0.0213639	0.0213655	0.0213669	0.0213682	0.0213693	0.0213703	0.0213711	0.0213718	0.0213724	0.0213729	0.0213733	0.0213736	0.0213738	0.021374	0.0213741	0.0213742	0.0213742	0.0213742	0.0213742	0.0213741	0.021374	0.0213739	0.0213737	0.0213736	0.0213734	0.0213733	0.0213731	0.0213729	0.0213728
																				0.0213734	0.0213751	0.0213766	0.021378	0.0213791	0.0213801	0.0213809	0.0213815	0.0213821	0.0213825	0.0213828	0.021383	0.0213831	0.0213831	0.0213831	0.021383	0.0213829	0.0213827	0.0213825	0.0213822	0.021382	0.0213817	0.0213814	0.0213811	0.0213807	0.0213804	0.0213801	0.0213797	0.0213794	0.0213791
																				0.0213855	0.0213871	0.0213884	0.0213896	0.0213906	0.0213914	0.021392	0.0213925	0.0213928	0.021393	0.0213931	0.0213931	0.021393	0.0213928	0.0213926	0.0213923	0.0213919	0.0213915	0.0213911	0.0213906	0.0213901	0.0213896	0.0213891	0.0213886	0.0213881	0.0213876	0.0213871	0.0213865	0.021386	0.0213855
																				0.0213982	0.0213997	0.0214009	0.0214019	0.0214027	0.0214033	0.0214037	0.021404	0.0214041	0.0214041	0.0214039	0.0214037	0.0214033	0.0214029	0.0214024	0.0214019	0.0214013	0.0214006	0.0214	0.0213993	0.0213986	0.0213979	0.0213971	0.0213964	0.0213957	0.021395	0.0213942	0.0213935	0.0213928	0.0213922
																				0.0214118	0.0214131	0.0214141	0.021415	0.0214155	0.0214159	0.0214161	0.0214161	0.021416	0.0214157	0.0214153	0.0214148	0.0214141	0.0214135	0.0214127	0.0214119	0.021411	0.0214101	0.0214092	0.0214083	0.0214073	0.0214064	0.0214054	0.0214045	0.0214035	0.0214026	0.0214016	0.0214007	0.0213998	0.0213989
																				0.0214262	0.0214273	0.0214282	0.0214288	0.0214291	0.0214292	0.0214291	0.0214289	0.0214284	0.0214279	0.0214272	0.0214264	0.0214255	0.0214245	0.0214234	0.0214223	0.0214212	0.02142	0.0214188	0.0214176	0.0214164	0.0214152	0.021414	0.0214128	0.0214116	0.0214104	0.0214092	0.0214081	0.021407	0.0214059
																				0.0214415	0.0214424	0.021443	0.0214434	0.0214434	0.0214433	0.0214429	0.0214423	0.0214416	0.0214407	0.0214396	0.0214385	0.0214373	0.021436	0.0214346	0.0214332	0.0214317	0.0214303	0.0214288	0.0214273	0.0214258	0.0214243	0.0214228	0.0214213	0.0214199	0.0214184	0.021417	0.0214157	0.0214143	0.021413
																				0.0214578	0.0214585	0.0214588	0.0214588	0.0214586	0.0214581	0.0214574	0.0214564	0.0214553	0.0214541	0.0214527	0.0214512	0.0214496	0.021448	0.0214462	0.0214445	0.0214427	0.0214409	0.0214391	0.0214373	0.0214354	0.0214336	0.0214319	0.0214301	0.0214284	0.0214267	0.0214251	0.0214235	0.0214219	0.0214204
																				0.0214752	0.0214755	0.0214755	0.0214752	0.0214746	0.0214738	0.0214727	0.0214713	0.0214698	0.0214682	0.0214664	0.0214645	0.0214625	0.0214605	0.0214584	0.0214562	0.0214541	0.0214519	0.0214497	0.0214476	0.0214454	0.0214433	0.0214412	0.0214392	0.0214372	0.0214352	0.0214333	0.0214314	0.0214296	0.0214278
																				0.0214937	0.0214937	0.0214933	0.0214926	0.0214916	0.0214903	0.0214888	0.021487	0.0214851	0.021483	0.0214808	0.0214784	0.021476	0.0214735	0.021471	0.0214685	0.0214659	0.0214634	0.0214608	0.0214583	0.0214558	0.0214533	0.0214509	0.0214485	0.0214462	0.0214439	0.0214417	0.0214396	0.0214375	0.0214355
																				0.0215134	0.021513	0.0215123	0.0215111	0.0215096	0.0215079	0.0215058	0.0215036	0.0215011	0.0214986	0.0214958	0.021493	0.0214901	0.0214872	0.0214842	0.0214812	0.0214782	0.0214752	0.0214723	0.0214693	0.0214665	0.0214636	0.0214608	0.0214581	0.0214555	0.0214529	0.0214504	0.0214479	0.0214456	0.0214433
																				0.0215346	0.0215337	0.0215324	0.0215307	0.0215287	0.0215264	0.0215238	0.021521	0.021518	0.0215149	0.0215116	0.0215083	0.0215048	0.0215014	0.0214979	0.0214944	0.0214909	0.0214875	0.0214841	0.0214808	0.0214775	0.0214742	0.0214711	0.021468	0.021465	0.0214621	0.0214592	0.0214565	0.0214538	0.0214512
																				0.0215571	0.0215557	0.0215539	0.0215516	0.021549	0.021546	0.0215428	0.0215394	0.0215358	0.0215321	0.0215282	0.0215242	0.0215202	0.0215162	0.0215122	0.0215082	0.0215042	0.0215002	0.0214964	0.0214925	0.0214888	0.0214852	0.0214816	0.0214781	0.0214747	0.0214715	0.0214683	0.0214652	0.0214622	0.0214593
																				0.0215813	0.0215793	0.0215767	0.0215738	0.0215705	0.0215668	0.0215629	0.0215588	0.0215545	0.0215501	0.0215455	0.0215409	0.0215363	0.0215317	0.021527	0.0215224	0.0215179	0.0215134	0.021509	0.0215047	0.0215005	0.0214964	0.0214924	0.0214885	0.0214847	0.0214811	0.0214775	0.0214741	0.0214708	0.0214676
																				0.0216073	0.0216045	0.0216012	0.0215974	0.0215933	0.0215889	0.0215842	0.0215793	0.0215742	0.021569	0.0215637	0.0215584	0.0215531	0.0215478	0.0215425	0.0215372	0.0215321	0.021527	0.0215221	0.0215173	0.0215125	0.0215079	0.0215035	0.0214992	0.021495	0.0214909	0.021487	0.0214832	0.0214795	0.021476
																				0.0216351	0.0216314	0.0216272	0.0216226	0.0216176	0.0216123	0.0216067	0.0216009	0.021595	0.0215889	0.0215828	0.0215767	0.0215706	0.0215645	0.0215585	0.0215526	0.0215468	0.0215411	0.0215356	0.0215302	0.0215249	0.0215198	0.0215149	0.0215101	0.0215054	0.0215009	0.0214966	0.0214925	0.0214884	0.0214846
																				0.021665	0.0216603	0.0216551	0.0216495	0.0216434	0.0216371	0.0216305	0.0216237	0.0216168	0.0216098	0.0216028	0.0215958	0.0215888	0.021582	0.0215752	0.0215685	0.021562	0.0215557	0.0215495	0.0215435	0.0215376	0.021532	0.0215265	0.0215212	0.0215161	0.0215112	0.0215064	0.0215019	0.0214975	0.0214932
																				0.0216973	0.0216914	0.021685	0.0216781	0.0216709	0.0216634	0.0216557	0.0216478	0.0216398	0.0216318	0.0216237	0.0216158	0.0216079	0.0216001	0.0215925	0.0215851	0.0215778	0.0215707	0.0215638	0.0215572	0.0215507	0.0215445	0.0215384	0.0215326	0.021527	0.0215216	0.0215164	0.0215114	0.0215067	0.021502
																				0.021732	0.0217247	0.0217169	0.0217087	0.0217002	0.0216913	0.0216823	0.0216732	0.021664	0.0216548	0.0216457	0.0216366	0.0216277	0.021619	0.0216105	0.0216021	0.021594	0.0215862	0.0215786	0.0215712	0.0215641	0.0215572	0.0215506	0.0215443	0.0215381	0.0215322	0.0215266	0.0215212	0.021516	0.021511
																				0.0217695	0.0217606	0.0217512	0.0217414	0.0217313	0.021721	0.0217105	0.0217	0.0216895	0.021679	0.0216686	0.0216584	0.0216484	0.0216386	0.0216291	0.0216198	0.0216108	0.0216021	0.0215937	0.0215856	0.0215778	0.0215703	0.0215631	0.0215561	0.0215494	0.021543	0.0215369	0.021531	0.0215254	0.02152
																				0.02181	0.0217993	0.021788	0.0217764	0.0217646	0.0217525	0.0217404	0.0217283	0.0217163	0.0217043	0.0216926	0.0216811	0.0216699	0.021659	0.0216484	0.0216381	0.0216281	0.0216185	0.0216093	0.0216004	0.0215918	0.0215836	0.0215757	0.0215682	0.0215609	0.021554	0.0215473	0.021541	0.0215349	0.0215291
																				0.0218539	0.021841	0.0218276	0.0218139	0.0218	0.021786	0.021772	0.0217582	0.0217444	0.0217309	0.0217177	0.0217048	0.0216923	0.0216801	0.0216683	0.0216569	0.021646	0.0216354	0.0216253	0.0216155	0.0216062	0.0215972	0.0215886	0.0215804	0.0215726	0.0215651	0.0215579	0.021551	0.0215445	0.0215382
																				0.0219016	0.021886	0.0218701	0.021854	0.0218378	0.0218216	0.0218055	0.0217897	0.0217741	0.0217588	0.0217439	0.0217295	0.0217155	0.021702	0.0216889	0.0216763	0.0216643	0.0216527	0.0216416	0.021631	0.0216208	0.0216111	0.0216018	0.0215929	0.0215844	0.0215763	0.0215686	0.0215612	0.0215542	0.0215475
																				0.0219534	0.0219347	0.0219159	0.021897	0.0218781	0.0218594	0.021841	0.0218229	0.0218052	0.021788	0.0217713	0.0217552	0.0217396	0.0217246	0.0217102	0.0216963	0.0216831	0.0216704	0.0216583	0.0216467	0.0216357	0.0216251	0.0216151	0.0216055	0.0215963	0.0215876	0.0215793	0.0215714	0.0215639	0.0215567
																				0.0220098	0.0219875	0.0219652	0.0219431	0.0219212	0.0218996	0.0218785	0.0218579	0.0218379	0.0218185	0.0217998	0.0217818	0.0217645	0.0217479	0.021732	0.0217169	0.0217024	0.0216885	0.0216753	0.0216627	0.0216508	0.0216394	0.0216285	0.0216182	0.0216084	0.021599	0.0215902	0.0215817	0.0215737	0.021566
																				0.0220713	0.0220448	0.0220185	0.0219926	0.0219672	0.0219423	0.0219182	0.0218948	0.0218722	0.0218505	0.0218295	0.0218095	0.0217903	0.021772	0.0217546	0.0217379	0.0217221	0.021707	0.0216927	0.021679	0.0216661	0.0216538	0.0216421	0.0216311	0.0216205	0.0216105	0.021601	0.021592	0.0215834	0.0215753
																				0.0221386	0.022107	0.022076	0.0220457	0.0220162	0.0219877	0.0219602	0.0219336	0.0219081	0.0218837	0.0218604	0.0218382	0.021817	0.0217968	0.0217777	0.0217595	0.0217422	0.0217258	0.0217103	0.0216956	0.0216816	0.0216684	0.0216559	0.021644	0.0216327	0.021622	0.0216119	0.0216023	0.0215932	0.0215846
																				0.0222124	0.0221747	0.0221381	0.0221027	0.0220686	0.0220359	0.0220044	0.0219744	0.0219457	0.0219184	0.0218925	0.0218678	0.0218444	0.0218223	0.0218013	0.0217815	0.0217627	0.0217449	0.0217281	0.0217123	0.0216973	0.0216831	0.0216696	0.021657	0.0216449	0.0216336	0.0216228	0.0216126	0.021603	0.0215938
																				0.0222935	0.0222485	0.0222053	0.022164	0.0221245	0.0220869	0.0220512	0.0220172	0.021985	0.0219545	0.0219257	0.0218984	0.0218727	0.0218484	0.0218255	0.0218039	0.0217835	0.0217643	0.0217462	0.0217291	0.021713	0.0216978	0.0216835	0.0216699	0.0216572	0.0216451	0.0216337	0.0216229	0.0216126	0.021603
																				0.0223829	0.0223291	0.0222781	0.0222298	0.0221842	0.0221411	0.0221004	0.0220621	0.0220259	0.0219919	0.02196	0.0219299	0.0219016	0.0218751	0.0218501	0.0218266	0.0218046	0.0217839	0.0217644	0.0217461	0.0217288	0.0217126	0.0216973	0.0216829	0.0216693	0.0216565	0.0216444	0.021633	0.0216222	0.0216121
																				0.0224816	0.0224172	0.0223568	0.0223004	0.0222477	0.0221983	0.0221521	0.0221089	0.0220685	0.0220307	0.0219953	0.0219622	0.0219312	0.0219022	0.0218751	0.0218497	0.0218259	0.0218036	0.0217827	0.0217631	0.0217447	0.0217274	0.0217111	0.0216958	0.0216814	0.0216679	0.0216551	0.0216431	0.0216317	0.021621
																				0.022591	0.0225135	0.0224421	0.0223762	0.0223152	0.0222588	0.0222064	0.0221578	0.0221127	0.0220707	0.0220316	0.0219952	0.0219614	0.0219298	0.0219004	0.021873	0.0218473	0.0218234	0.021801	0.0217801	0.0217604	0.0217421	0.0217248	0.0217086	0.0216934	0.0216791	0.0216657	0.021653	0.0216411	0.0216298
																				0.0227124	0.022619	0.0225343	0.0224572	0.0223869	0.0223224	0.0222632	0.0222086	0.0221583	0.0221118	0.0220688	0.0220289	0.021992	0.0219578	0.0219259	0.0218964	0.0218688	0.0218432	0.0218193	0.021797	0.0217761	0.0217566	0.0217384	0.0217213	0.0217052	0.0216902	0.0216761	0.0216628	0.0216503	0.0216385
																				0.0228475	0.0227344	0.0226339	0.0225439	0.0224628	0.0223893	0.0223224	0.0222613	0.0222053	0.022154	0.0221067	0.0220632	0.022023	0.0219859	0.0219516	0.0219198	0.0218903	0.0218629	0.0218374	0.0218137	0.0217916	0.021771	0.0217517	0.0217337	0.0217169	0.0217011	0.0216862	0.0216723	0.0216592	0.0216469
																				0.0229976	0.0228604	0.0227412	0.0226362	0.022543	0.0224594	0.022384	0.0223157	0.0222536	0.022197	0.0221452	0.0220978	0.0220542	0.0220141	0.0219772	0.0219431	0.0219116	0.0218825	0.0218554	0.0218303	0.0218069	0.0217852	0.0217649	0.0217459	0.0217282	0.0217117	0.0216962	0.0216816	0.021668	0.0216551
																				0.0231641	0.0229977	0.0228565	0.0227344	0.0226274	0.0225325	0.0224477	0.0223716	0.0223029	0.0222407	0.0221841	0.0221326	0.0220855	0.0220423	0.0220027	0.0219663	0.0219327	0.0219017	0.0218731	0.0218465	0.0218219	0.021799	0.0217777	0.0217578	0.0217393	0.021722	0.0217058	0.0216906	0.0216764	0.0216631
																				0.0233485	0.0231472	0.0229804	0.0228386	0.0227159	0.0226084	0.0225134	0.0224288	0.022353	0.0222848	0.0222232	0.0221674	0.0221166	0.0220703	0.0220279	0.0219891	0.0219535	0.0219207	0.0218904	0.0218624	0.0218365	0.0218125	0.0217902	0.0217694	0.02175	0.021732	0.0217151	0.0216994	0.0216846	0.0216708
																				0.023553	0.0233104	0.0231136	0.022949	0.0228086	0.0226871	0.0225808	0.022487	0.0224036	0.0223291	0.0222622	0.0222019	0.0221474	0.0220978	0.0220527	0.0220115	0.0219737	0.0219391	0.0219072	0.0218778	0.0218506	0.0218255	0.0218022	0.0217805	0.0217604	0.0217416	0.0217241	0.0217077	0.0216924	0.0216781
																				0.0237836	0.0234905	0.0232574	0.023066	0.0229053	0.0227681	0.0226494	0.0225457	0.0224543	0.0223732	0.0223009	0.022236	0.0221776	0.0221248	0.0220769	0.0220332	0.0219934	0.0219569	0.0219235	0.0218927	0.0218643	0.021838	0.0218137	0.0217912	0.0217703	0.0217508	0.0217327	0.0217157	0.0216999	0.0216851
																				0.0240565	0.0236934	0.0234133	0.0231895	0.0230055	0.0228508	0.0227187	0.0226045	0.0225047	0.0224168	0.0223389	0.0222693	0.022207	0.0221509	0.0221002	0.0220542	0.0220123	0.0219741	0.021939	0.0219069	0.0218773	0.02185	0.0218247	0.0218014	0.0217797	0.0217595	0.0217408	0.0217233	0.021707	0.0216917
																				0.0244012	0.0239244	0.0235819	0.023319	0.0231083	0.0229345	0.0227881	0.0226628	0.0225542	0.0224594	0.0223758	0.0223016	0.0222354	0.0221761	0.0221226	0.0220742	0.0220303	0.0219903	0.0219538	0.0219203	0.0218896	0.0218612	0.0218351	0.0218109	0.0217885	0.0217677	0.0217484	0.0217304	0.0217136	0.0216979
																				0.0248232	0.0241797	0.0237603	0.0234524	0.0232124	0.0230181	0.0228565	0.0227198	0.0226024	0.0225004	0.0224112	0.0223324	0.0222624	0.0221999	0.0221438	0.0220932	0.0220473	0.0220057	0.0219677	0.021933	0.0219011	0.0218718	0.0218448	0.0218199	0.0217968	0.0217754	0.0217555	0.021737	0.0217198	0.0217037
																				0.0252378	0.024453	0.0239453	0.0235873	0.0233159	0.0231001	0.0229231	0.0227747	0.0226484	0.0225395	0.0224447	0.0223615	0.0222878	0.0222223	0.0221636	0.0221109	0.0220632	0.02202	0.0219806	0.0219447	0.0219118	0.0218816	0.0218538	0.0218281	0.0218044	0.0217825	0.0217621	0.0217431	0.0217255	0.021709
																				0.0262444	0.024782	0.0241339	0.0237208	0.0234171	0.0231793	0.0229865	0.0228266	0.0226916	0.022576	0.0224759	0.0223884	0.0223113	0.0222429	0.0221819	0.0221271	0.0220778	0.0220331	0.0219925	0.0219554	0.0219216	0.0218905	0.021862	0.0218357	0.0218114	0.0217889	0.021768	0.0217486	0.0217306	0.0217138
																				0.0264351	0.0249922	0.0243069	0.0238508	0.0235146	0.0232542	0.0230457	0.0228745	0.0227312	0.0226093	0.0225043	0.0224129	0.0223327	0.0222616	0.0221984	0.0221418	0.0220909	0.0220449	0.0220031	0.0219651	0.0219304	0.0218986	0.0218694	0.0218424	0.0218176	0.0217946	0.0217734	0.0217536	0.0217352	0.0217181
																				0.0269617	0.0253154	0.0245163	0.0239855	0.0236077	0.023323	0.0230991	0.0229174	0.0227665	0.022639	0.0225296	0.0224347	0.0223516	0.0222782	0.0222131	0.0221548	0.0221025	0.0220553	0.0220125	0.0219736	0.0219381	0.0219056	0.0218758	0.0218484	0.0218231	0.0217997	0.0217781	0.021758	0.0217393	0.0217219
																				0.0324784	0.0262846	0.024792	0.0241169	0.0236902	0.0233822	0.0231448	0.0229541	0.0227968	0.0226644	0.0225513	0.0224534	0.0223678	0.0222925	0.0222257	0.022166	0.0221125	0.0220643	0.0220206	0.021981	0.0219448	0.0219117	0.0218814	0.0218535	0.0218278	0.021804	0.0217821	0.0217617	0.0217428	0.0217251
																				0.0326472	0.0264103	0.0249062	0.0241991	0.0237501	0.023428	0.0231811	0.0229838	0.0228216	0.0226854	0.0225692	0.0224689	0.0223813	0.0223043	0.0222361	0.0221753	0.0221208	0.0220717	0.0220273	0.021987	0.0219503	0.0219167	0.021886	0.0218577	0.0218317	0.0218076	0.0217854	0.0217648	0.0217456	0.0217278
																				0.0327039	0.0264494	0.0249506	0.0242425	0.0237878	0.0234597	0.0232077	0.0230062	0.0228405	0.0227016	0.0225832	0.022481	0.0223919	0.0223136	0.0222443	0.0221826	0.0221273	0.0220776	0.0220326	0.0219918	0.0219546	0.0219207	0.0218896	0.021861	0.0218347	0.0218104	0.021788	0.0217672	0.0217479	0.0217299
																				0.0327292	0.0264673	0.0249702	0.0242643	0.0238094	0.0234796	0.0232253	0.0230215	0.0228538	0.0227131	0.0225931	0.0224896	0.0223995	0.0223203	0.0222503	0.0221879	0.022132	0.0220818	0.0220364	0.0219952	0.0219577	0.0219235	0.0218922	0.0218634	0.0218369	0.0218125	0.0217898	0.0217689	0.0217495	0.0217314
																				0.0327412	0.0264758	0.024979	0.0242744	0.0238204	0.0234904	0.0232352	0.0230304	0.0228616	0.0227199	0.0225991	0.0224949	0.0224041	0.0223243	0.0222538	0.022191	0.0221348	0.0220843	0.0220387	0.0219973	0.0219596	0.0219252	0.0218937	0.0218648	0.0218382	0.0218137	0.021791	0.0217699	0.0217504	0.0217323
																				0.0327447	0.0264783	0.0249816	0.0242774	0.0238237	0.0234937	0.0232384	0.0230333	0.0228642	0.0227221	0.022601	0.0224966	0.0224056	0.0223257	0.022255	0.0221921	0.0221358	0.0220852	0.0220394	0.021998	0.0219602	0.0219258	0.0218943	0.0218653	0.0218387	0.0218141	0.0217913	0.0217703	0.0217508	0.0217326
																				0.0327412	0.0264758	0.024979	0.0242744	0.0238204	0.0234904	0.0232352	0.0230304	0.0228616	0.0227199	0.0225991	0.0224949	0.0224041	0.0223243	0.0222538	0.022191	0.0221348	0.0220843	0.0220387	0.0219973	0.0219596	0.0219252	0.0218937	0.0218648	0.0218382	0.0218137	0.021791	0.0217699	0.0217504	0.0217323
																				0.0327292	0.0264673	0.0249702	0.0242643	0.0238094	0.0234796	0.0232253	0.0230215	0.0228538	0.0227131	0.0225931	0.0224896	0.0223995	0.0223203	0.0222503	0.0221879	0.022132	0.0220818	0.0220364	0.0219952	0.0219577	0.0219235	0.0218922	0.0218634	0.0218369	0.0218125	0.0217898	0.0217689	0.0217495	0.0217314
																				0.0327039	0.0264494	0.0249506	0.0242425	0.0237878	0.0234597	0.0232077	0.0230062	0.0228405	0.0227016	0.0225832	0.022481	0.0223919	0.0223136	0.0222443	0.0221826	0.0221273	0.0220776	0.0220326	0.0219918	0.0219546	0.0219207	0.0218896	0.021861	0.0218347	0.0218104	0.021788	0.0217672	0.0217479	0.0217299
																				0.0326472	0.0264103	0.0249062	0.0241991	0.0237501	0.023428	0.0231811	0.0229838	0.0228216	0.0226854	0.0225692	0.0224689	0.0223813	0.0223043	0.0222361	0.0221753	0.0221208	0.0220717	0.0220273	0.021987	0.0219503	0.0219167	0.021886	0.0218577	0.0218317	0.0218076	0.0217854	0.0217648	0.0217456	0.0217278
																				0.0324784	0.0262846	0.024792	0.0241169	0.0236902	0.0233822	0.0231448	0.0229541	0.0227968	0.0226644	0.0225513	0.0224534	0.0223678	0.0222925	0.0222257	0.022166	0.0221125	0.0220643	0.0220206	0.021981	0.0219448	0.0219117	0.0218814	0.0218535	0.0218278	0.021804	0.0217821	0.0217617	0.0217428	0.0217251
																				0.0269617	0.0253154	0.0245163	0.0239855	0.0236077	0.023323	0.0230991	0.0229174	0.0227665	0.022639	0.0225296	0.0224347	0.0223516	0.0222782	0.0222131	0.0221548	0.0221025	0.0220553	0.0220125	0.0219736	0.0219381	0.0219056	0.0218758	0.0218484	0.0218231	0.0217997	0.0217781	0.021758	0.0217393	0.0217219
																				0.0264351	0.0249922	0.0243069	0.0238508	0.0235146	0.0232542	0.0230457	0.0228745	0.0227312	0.0226093	0.0225043	0.0224129	0.0223327	0.0222616	0.0221984	0.0221418	0.0220909	0.0220449	0.0220031	0.0219651	0.0219304	0.0218986	0.0218694	0.0218424	0.0218176	0.0217946	0.0217734	0.0217536	0.0217352	0.0217181
																				0.0262444	0.024782	0.0241339	0.0237208	0.0234171	0.0231793	0.0229865	0.0228266	0.0226916	0.022576	0.0224759	0.0223884	0.0223113	0.0222429	0.0221819	0.0221271	0.0220778	0.0220331	0.0219925	0.0219554	0.0219216	0.0218905	0.021862	0.0218357	0.0218114	0.0217889	0.021768	0.0217486	0.0217306	0.0217138
																				0.0252378	0.024453	0.0239453	0.0235873	0.0233159	0.0231001	0.0229231	0.0227747	0.0226484	0.0225395	0.0224447	0.0223615	0.0222878	0.0222223	0.0221636	0.0221109	0.0220632	0.02202	0.0219806	0.0219447	0.0219118	0.0218816	0.0218538	0.0218281	0.0218044	0.0217825	0.0217621	0.0217431	0.0217255	0.021709
																				0.0248232	0.0241797	0.0237603	0.0234524	0.0232124	0.0230181	0.0228565	0.0227198	0.0226024	0.0225004	0.0224112	0.0223324	0.0222624	0.0221999	0.0221438	0.0220932	0.0220473	0.0220057	0.0219677	0.021933	0.0219011	0.0218718	0.0218448	0.0218199	0.0217968	0.0217754	0.0217555	0.021737	0.0217198	0.0217037
																				0.0244012	0.0239244	0.0235819	0.023319	0.0231083	0.0229345	0.0227881	0.0226628	0.0225542	0.0224594	0.0223758	0.0223016	0.0222354	0.0221761	0.0221226	0.0220742	0.0220303	0.0219903	0.0219538	0.0219203	0.0218896	0.0218612	0.0218351	0.0218109	0.0217885	0.0217677	0.0217484	0.0217304	0.0217136	0.0216979
																				0.0240565	0.0236934	0.0234133	0.0231895	0.0230055	0.0228508	0.0227187	0.0226045	0.0225047	0.0224168	0.0223389	0.0222693	0.022207	0.0221509	0.0221002	0.0220542	0.0220123	0.0219741	0.021939	0.0219069	0.0218773	0.02185	0.0218247	0.0218014	0.0217797	0.0217595	0.0217408	0.0217233	0.021707	0.0216917
																				0.0237836	0.0234905	0.0232574	0.023066	0.0229053	0.0227681	0.0226494	0.0225457	0.0224543	0.0223732	0.0223009	0.022236	0.0221776	0.0221248	0.0220769	0.0220332	0.0219934	0.0219569	0.0219235	0.0218927	0.0218643	0.021838	0.0218137	0.0217912	0.0217703	0.0217508	0.0217327	0.0217157	0.0216999	0.0216851
																				0.023553	0.0233104	0.0231136	0.022949	0.0228086	0.0226871	0.0225808	0.022487	0.0224036	0.0223291	0.0222622	0.0222019	0.0221474	0.0220978	0.0220527	0.0220115	0.0219737	0.0219391	0.0219072	0.0218778	0.0218506	0.0218255	0.0218022	0.0217805	0.0217604	0.0217416	0.0217241	0.0217077	0.0216924	0.0216781
																				0.0233485	0.0231472	0.0229804	0.0228386	0.0227159	0.0226084	0.0225134	0.0224288	0.022353	0.0222848	0.0222232	0.0221674	0.0221166	0.0220703	0.0220279	0.0219891	0.0219535	0.0219207	0.0218904	0.0218624	0.0218365	0.0218125	0.0217902	0.0217694	0.02175	0.021732	0.0217151	0.0216994	0.0216846	0.0216708
																				0.0231641	0.0229977	0.0228565	0.0227344	0.0226274	0.0225325	0.0224477	0.0223716	0.0223029	0.0222407	0.0221841	0.0221326	0.0220855	0.0220423	0.0220027	0.0219663	0.0219327	0.0219017	0.0218731	0.0218465	0.0218219	0.021799	0.0217777	0.0217578	0.0217393	0.021722	0.0217058	0.0216906	0.0216764	0.0216631
																				0.0229976	0.0228604	0.0227412	0.0226362	0.022543	0.0224594	0.022384	0.0223157	0.0222536	0.022197	0.0221452	0.0220978	0.0220542	0.0220141	0.0219772	0.0219431	0.0219116	0.0218825	0.0218554	0.0218303	0.0218069	0.0217852	0.0217649	0.0217459	0.0217282	0.0217117	0.0216962	0.0216816	0.021668	0.0216551
																				0.0228475	0.0227344	0.0226339	0.0225439	0.0224628	0.0223893	0.0223224	0.0222613	0.0222053	0.022154	0.0221067	0.0220632	0.022023	0.0219859	0.0219516	0.0219198	0.0218903	0.0218629	0.0218374	0.0218137	0.0217916	0.021771	0.0217517	0.0217337	0.0217169	0.0217011	0.0216862	0.0216723	0.0216592	0.0216469
																				0.0227124	0.022619	0.0225343	0.0224572	0.0223869	0.0223224	0.0222632	0.0222086	0.0221583	0.0221118	0.0220688	0.0220289	0.021992	0.0219578	0.0219259	0.0218964	0.0218688	0.0218432	0.0218193	0.021797	0.0217761	0.0217566	0.0217384	0.0217213	0.0217052	0.0216902	0.0216761	0.0216628	0.0216503	0.0216385
																				0.022591	0.0225135	0.0224421	0.0223762	0.0223152	0.0222588	0.0222064	0.0221578	0.0221127	0.0220707	0.0220316	0.0219952	0.0219614	0.0219298	0.0219004	0.021873	0.0218473	0.0218234	0.021801	0.0217801	0.0217604	0.0217421	0.0217248	0.0217086	0.0216934	0.0216791	0.0216657	0.021653	0.0216411	0.0216298
																				0.0224816	0.0224172	0.0223568	0.0223004	0.0222477	0.0221983	0.0221521	0.0221089	0.0220685	0.0220307	0.0219953	0.0219622	0.0219312	0.0219022	0.0218751	0.0218497	0.0218259	0.0218036	0.0217827	0.0217631	0.0217447	0.0217274	0.0217111	0.0216958	0.0216814	0.0216679	0.0216551	0.0216431	0.0216317	0.021621
																				0.0223829	0.0223291	0.0222781	0.0222298	0.0221842	0.0221411	0.0221004	0.0220621	0.0220259	0.0219919	0.02196	0.0219299	0.0219016	0.0218751	0.0218501	0.0218266	0.0218046	0.0217839	0.0217644	0.0217461	0.0217288	0.0217126	0.0216973	0.0216829	0.0216693	0.0216565	0.0216444	0.021633	0.0216222	0.0216121
																				0.0222935	0.0222485	0.0222053	0.022164	0.0221245	0.0220869	0.0220512	0.0220172	0.021985	0.0219545	0.0219257	0.0218984	0.0218727	0.0218484	0.0218255	0.0218039	0.0217835	0.0217643	0.0217462	0.0217291	0.021713	0.0216978	0.0216835	0.0216699	0.0216572	0.0216451	0.0216337	0.0216229	0.0216126	0.021603
																				0.0222124	0.0221747	0.0221381	0.0221027	0.0220686	0.0220359	0.0220044	0.0219744	0.0219457	0.0219184	0.0218925	0.0218678	0.0218444	0.0218223	0.0218013	0.0217815	0.0217627	0.0217449	0.0217281	0.0217123	0.0216973	0.0216831	0.0216696	0.021657	0.0216449	0.0216336	0.0216228	0.0216126	0.021603	0.0215938
																				0.0221386	0.022107	0.022076	0.0220457	0.0220162	0.0219877	0.0219602	0.0219336	0.0219081	0.0218837	0.0218604	0.0218382	0.021817	0.0217968	0.0217777	0.0217595	0.0217422	0.0217258	0.0217103	0.0216956	0.0216816	0.0216684	0.0216559	0.021644	0.0216327	0.021622	0.0216119	0.0216023	0.0215932	0.0215846
																				0.0220713	0.0220448	0.0220185	0.0219926	0.0219672	0.0219423	0.0219182	0.0218948	0.0218722	0.0218505	0.0218295	0.0218095	0.0217903	0.021772	0.0217546	0.0217379	0.0217221	0.021707	0.0216927	0.021679	0.0216661	0.0216538	0.0216421	0.0216311	0.0216205	0.0216105	0.021601	0.021592	0.0215834	0.0215753
																				0.0220098	0.0219875	0.0219652	0.0219431	0.0219212	0.0218996	0.0218785	0.0218579	0.0218379	0.0218185	0.0217998	0.0217818	0.0217645	0.0217479	0.021732	0.0217169	0.0217024	0.0216885	0.0216753	0.0216627	0.0216508	0.0216394	0.0216285	0.0216182	0.0216084	0.021599	0.0215902	0.0215817	0.0215737	0.021566
																				0.0219534	0.0219347	0.0219159	0.021897	0.0218781	0.0218594	0.021841	0.0218229	0.0218052	0.021788	0.0217713	0.0217552	0.0217396	0.0217246	0.0217102	0.0216963	0.0216831	0.0216704	0.0216583	0.0216467	0.0216357	0.0216251	0.0216151	0.0216055	0.0215963	0.0215876	0.0215793	0.0215714	0.0215639	0.0215567
																				0.0219016	0.021886	0.0218701	0.021854	0.0218378	0.0218216	0.0218055	0.0217897	0.0217741	0.0217588	0.0217439	0.0217295	0.0217155	0.021702	0.0216889	0.0216763	0.0216643	0.0216527	0.0216416	0.021631	0.0216208	0.0216111	0.0216018	0.0215929	0.0215844	0.0215763	0.0215686	0.0215612	0.0215542	0.0215475
																				0.0218539	0.021841	0.0218276	0.0218139	0.0218	0.021786	0.021772	0.0217582	0.0217444	0.0217309	0.0217177	0.0217048	0.0216923	0.0216801	0.0216683	0.0216569	0.021646	0.0216354	0.0216253	0.0216155	0.0216062	0.0215972	0.0215886	0.0215804	0.0215726	0.0215651	0.0215579	0.021551	0.0215445	0.0215382
																				0.02181	0.0217993	0.021788	0.0217764	0.0217646	0.0217525	0.0217404	0.0217283	0.0217163	0.0217043	0.0216926	0.0216811	0.0216699	0.021659	0.0216484	0.0216381	0.0216281	0.0216185	0.0216093	0.0216004	0.0215918	0.0215836	0.0215757	0.0215682	0.0215609	0.021554	0.0215473	0.021541	0.0215349	0.0215291
																				0.0217695	0.0217606	0.0217512	0.0217414	0.0217313	0.021721	0.0217105	0.0217	0.0216895	0.021679	0.0216686	0.0216584	0.0216484	0.0216386	0.0216291	0.0216198	0.0216108	0.0216021	0.0215937	0.0215856	0.0215778	0.0215703	0.0215631	0.0215561	0.0215494	0.021543	0.0215369	0.021531	0.0215254	0.02152
																				0.021732	0.0217247	0.0217169	0.0217087	0.0217002	0.0216913	0.0216823	0.0216732	0.021664	0.0216548	0.0216457	0.0216366	0.0216277	0.021619	0.0216105	0.0216021	0.021594	0.0215862	0.0215786	0.0215712	0.0215641	0.0215572	0.0215506	0.0215443	0.0215381	0.0215322	0.0215266	0.0215212	0.021516	0.021511
																				0.0216973	0.0216914	0.021685	0.0216781	0.0216709	0.0216634	0.0216557	0.0216478	0.0216398	0.0216318	0.0216237	0.0216158	0.0216079	0.0216001	0.0215925	0.0215851	0.0215778	0.0215707	0.0215638	0.0215572	0.0215507	0.0215445	0.0215384	0.0215326	0.021527	0.0215216	0.0215164	0.0215114	0.0215067	0.021502
																				0.021665	0.0216603	0.0216551	0.0216495	0.0216434	0.0216371	0.0216305	0.0216237	0.0216168	0.0216098	0.0216028	0.0215958	0.0215888	0.021582	0.0215752	0.0215685	0.021562	0.0215557	0.0215495	0.0215435	0.0215376	0.021532	0.0215265	0.0215212	0.0215161	0.0215112	0.0215064	0.0215019	0.0214975	0.0214932
																				0.0216351	0.0216314	0.0216272	0.0216226	0.0216176	0.0216123	0.0216067	0.0216009	0.021595	0.0215889	0.0215828	0.0215767	0.0215706	0.0215645	0.0215585	0.0215526	0.0215468	0.0215411	0.0215356	0.0215302	0.0215249	0.0215198	0.0215149	0.0215101	0.0215054	0.0215009	0.0214966	0.0214925	0.0214884	0.0214846
																				0.0216073	0.0216045	0.0216012	0.0215974	0.0215933	0.0215889	0.0215842	0.0215793	0.0215742	0.021569	0.0215637	0.0215584	0.0215531	0.0215478	0.0215425	0.0215372	0.0215321	0.021527	0.0215221	0.0215173	0.0215125	0.0215079	0.0215035	0.0214992	0.021495	0.0214909	0.021487	0.0214832	0.0214795	0.021476
																				0.0215813	0.0215793	0.0215767	0.0215738	0.0215705	0.0215668	0.0215629	0.0215588	0.0215545	0.0215501	0.0215455	0.0215409	0.0215363	0.0215317	0.021527	0.0215224	0.0215179	0.0215134	0.021509	0.0215047	0.0215005	0.0214964	0.0214924	0.0214885	0.0214847	0.0214811	0.0214775	0.0214741	0.0214708	0.0214676
																				0.0215571	0.0215557	0.0215539	0.0215516	0.021549	0.021546	0.0215428	0.0215394	0.0215358	0.0215321	0.0215282	0.0215242	0.0215202	0.0215162	0.0215122	0.0215082	0.0215042	0.0215002	0.0214964	0.0214925	0.0214888	0.0214852	0.0214816	0.0214781	0.0214747	0.0214715	0.0214683	0.0214652	0.0214622	0.0214593
																				0.0215346	0.0215337	0.0215324	0.0215307	0.0215287	0.0215264	0.0215238	0.021521	0.021518	0.0215149	0.0215116	0.0215083	0.0215048	0.0215014	0.0214979	0.0214944	0.0214909	0.0214875	0.0214841	0.0214808	0.0214775	0.0214742	0.0214711	0.021468	0.021465	0.0214621	0.0214592	0.0214565	0.0214538	0.0214512
																				0.0215134	0.021513	0.0215123	0.0215111	0.0215096	0.0215079	0.0215058	0.0215036	0.0215011	0.0214986	0.0214958	0.021493	0.0214901	0.0214872	0.0214842	0.0214812	0.0214782	0.0214752	0.0214723	0.0214693	0.0214665	0.0214636	0.0214608	0.0214581	0.0214555	0.0214529	0.0214504	0.0214479	0.0214456	0.0214433
																				0.0214937	0.0214937	0.0214933	0.0214926	0.0214916	0.0214903	0.0214888	0.021487	0.0214851	0.021483	0.0214808	0.0214784	0.021476	0.0214735	0.021471	0.0214685	0.0214659	0.0214634	0.0214608	0.0214583	0.0214558	0.0214533	0.0214509	0.0214485	0.0214462	0.0214439	0.0214417	0.0214396	0.0214375	0.0214355
																				0.0214752	0.0214755	0.0214755	0.0214752	0.0214746	0.0214738	0.0214727	0.0214713	0.0214698	0.0214682	0.0214664	0.0214645	0.0214625	0.0214605	0.0214584	0.0214562	0.0214541	0.0214519	0.0214497	0.0214476	0.0214454	0.0214433	0.0214412	0.0214392	0.0214372	0.0214352	0.0214333	0.0214314	0.0214296	0.0214278
																				0.0214578	0.0214585	0.0214588	0.0214588	0.0214586	0.0214581	0.0214574	0.0214564	0.0214553	0.0214541	0.0214527	0.0214512	0.0214496	0.021448	0.0214462	0.0214445	0.0214427	0.0214409	0.0214391	0.0214373	0.0214354	0.0214336	0.0214319	0.0214301	0.0214284	0.0214267	0.0214251	0.0214235	0.0214219	0.0214204
																				0.0214415	0.0214424	0.021443	0.0214434	0.0214434	0.0214433	0.0214429	0.0214423	0.0214416	0.0214407	0.0214396	0.0214385	0.0214373	0.021436	0.0214346	0.0214332	0.0214317	0.0214303	0.0214288	0.0214273	0.0214258	0.0214243	0.0214228	0.0214213	0.0214199	0.0214184	0.021417	0.0214157	0.0214143	0.021413
																				0.0214262	0.0214273	0.0214282	0.0214288	0.0214291	0.0214292	0.0214291	0.0214289	0.0214284	0.0214279	0.0214272	0.0214264	0.0214255	0.0214245	0.0214234	0.0214223	0.0214212	0.02142	0.0214188	0.0214176	0.0214164	0.0214152	0.021414	0.0214128	0.0214116	0.0214104	0.0214092	0.0214081	0.021407	0.0214059
																				0.0214118	0.0214131	0.0214141	0.021415	0.0214155	0.0214159	0.0214161	0.0214161	0.021416	0.0214157	0.0214153	0.0214148	0.0214141	0.0214135	0.0214127	0.0214119	0.021411	0.0214101	0.0214092	0.0214083	0.0214073	0.0214064	0.0214054	0.0214045	0.0214035	0.0214026	0.0214016	0.0214007	0.0213998	0.0213989
																				0.0213982	0.0213997	0.0214009	0.0214019	0.0214027	0.0214033	0.0214037	0.021404	0.0214041	0.0214041	0.0214039	0.0214037	0.0214033	0.0214029	0.0214024	0.0214019	0.0214013	0.0214006	0.0214	0.0213993	0.0213986	0.0213979	0.0213971	0.0213964	0.0213957	0.021395	0.0213942	0.0213935	0.0213928	0.0213922
																				0.0213855	0.0213871	0.0213884	0.0213896	0.0213906	0.0213914	0.021392	0.0213925	0.0213928	0.021393	0.0213931	0.0213931	0.021393	0.0213928	0.0213926	0.0213923	0.0213919	0.0213915	0.0213911	0.0213906	0.0213901	0.0213896	0.0213891	0.0213886	0.0213881	0.0213876	0.0213871	0.0213865	0.021386	0.0213855
																				0.0213734	0.0213751	0.0213766	0.021378	0.0213791	0.0213801	0.0213809	0.0213815	0.0213821	0.0213825	0.0213828	0.021383	0.0213831	0.0213831	0.0213831	0.021383	0.0213829	0.0213827	0.0213825	0.0213822	0.021382	0.0213817	0.0213814	0.0213811	0.0213807	0.0213804	0.0213801	0.0213797	0.0213794	0.0213791
																				0.0213621	0.0213639	0.0213655	0.0213669	0.0213682	0.0213693	0.0213703	0.0213711	0.0213718	0.0213724	0.0213729	0.0213733	0.0213736	0.0213738	0.021374	0.0213741	0.0213742	0.0213742	0.0213742	0.0213742	0.0213741	0.021374	0.0213739	0.0213737	0.0213736	0.0213734	0.0213733	0.0213731	0.0213729	0.0213728
																				0.0213513	0.0213532	0.0213549	0.0213565	0.0213579	0.0213591	0.0213602	0.0213612	0.0213621	0.0213628	0.0213635	0.0213641	0.0213645	0.021365	0.0213653	0.0213656	0.0213659	0.0213661	0.0213662	0.0213664	0.0213665	0.0213665	0.0213666	0.0213666	0.0213667	0.0213667	0.0213667	0.0213667	0.0213667	0.0213667
																				0.0213412	0.0213432	0.0213449	0.0213466	0.0213481	0.0213494	0.0213507	0.0213518	0.0213528	0.0213537	0.0213545	0.0213552	0.0213559	0.0213565	0.021357	0.0213574	0.0213579	0.0213582	0.0213586	0.0213589	0.0213591	0.0213594	0.0213596	0.0213598	0.02136	0.0213601	0.0213603	0.0213604	0.0213606	0.0213607
																				0.0213316	0.0213336	0.0213355	0.0213372	0.0213388	0.0213402	0.0213416	0.0213428	0.0213439	0.021345	0.0213459	0.0213468	0.0213476	0.0213483	0.021349	0.0213496	0.0213502	0.0213507	0.0213512	0.0213516	0.021352	0.0213524	0.0213528	0.0213531	0.0213535	0.0213538	0.0213541	0.0213544	0.0213546	0.0213549
																				0.0213226	0.0213246	0.0213265	0.0213283	0.02133	0.0213315	0.0213329	0.0213343	0.0213355	0.0213366	0.0213377	0.0213387	0.0213396	0.0213405	0.0213413	0.0213421	0.0213428	0.0213434	0.0213441	0.0213446	0.0213452	0.0213457	0.0213462	0.0213467	0.0213472	0.0213476	0.0213481	0.0213485	0.0213489	0.0213493
																				0.021314	0.0213161	0.021318	0.0213199	0.0213216	0.0213232	0.0213247	0.0213261	0.0213275	0.0213287	0.0213299	0.021331	0.021332	0.021333	0.0213339	0.0213348	0.0213357	0.0213364	0.0213372	0.0213379	0.0213386	0.0213393	0.0213399	0.0213405	0.0213411	0.0213417	0.0213422	0.0213428	0.0213433	0.0213438
																				0.0213059	0.021308	0.02131	0.0213119	0.0213136	0.0213153	0.0213169	0.0213184	0.0213198	0.0213211	0.0213224	0.0213236	0.0213248	0.0213258	0.0213269	0.0213279	0.0213288	0.0213297	0.0213306	0.0213314	0.0213322	0.021333	0.0213338	0.0213345	0.0213352	0.0213359	0.0213366	0.0213372	0.0213378	0.0213385
																				0.0212983	0.0213004	0.0213024	0.0213043	0.0213061	0.0213078	0.0213094	0.021311	0.0213125	0.0213139	0.0213153	0.0213166	0.0213178	0.021319	0.0213201	0.0213212	0.0213223	0.0213233	0.0213243	0.0213252	0.0213261	0.021327	0.0213279	0.0213287	0.0213295	0.0213303	0.0213311	0.0213318	0.0213326	0.0213333
																				0.021291	0.0212931	0.0212951	0.021297	0.0212989	0.0213007	0.0213023	0.021304	0.0213055	0.021307	0.0213084	0.0213098	0.0213111	0.0213124	0.0213136	0.0213148	0.021316	0.0213171	0.0213181	0.0213192	0.0213202	0.0213212	0.0213221	0.0213231	0.021324	0.0213249	0.0213258	0.0213266	0.0213274	0.0213283
																				0.0212841	0.0212862	0.0212882	0.0212902	0.0212921	0.0212939	0.0212956	0.0212973	0.0212989	0.0213004	0.0213019	0.0213034	0.0213047	0.0213061	0.0213074	0.0213087	0.0213099	0.0213111	0.0213123	0.0213134	0.0213145	0.0213156	0.0213166	0.0213177	0.0213187	0.0213196	0.0213206	0.0213216	0.0213225	0.0213234
																				0.0212776	0.0212797	0.0212817	0.0212837	0.0212856	0.0212874	0.0212892	0.0212909	0.0212925	0.0212941	0.0212957	0.0212972	0.0212986	0.0213001	0.0213014	0.0213028	0.0213041	0.0213054	0.0213066	0.0213078	0.021309	0.0213102	0.0213113	0.0213124	0.0213135	0.0213146	0.0213156	0.0213167	0.0213177	0.0213187
																				0.0212714	0.0212735	0.0212755	0.0212775	0.0212794	0.0212812	0.021283	0.0212848	0.0212865	0.0212881	0.0212897	0.0212913	0.0212928	0.0212943	0.0212957	0.0212971	0.0212985	0.0212998	0.0213011	0.0213024	0.0213037	0.0213049	0.0213061	0.0213073	0.0213085	0.0213097	0.0213108	0.0213119	0.021313	0.0213141
																				0.0212655	0.0212676	0.0212696	0.0212716	0.0212735	0.0212754	0.0212772	0.021279	0.0212807	0.0212824	0.021284	0.0212856	0.0212872	0.0212887	0.0212902	0.0212917	0.0212931	0.0212945	0.0212959	0.0212973	0.0212986	0.0212999	0.0213012	0.0213024	0.0213037	0.0213049	0.0213061	0.0213073	0.0213085	0.0213096
																				0.0212599	0.021262	0.021264	0.021266	0.0212679	0.0212698	0.0212716	0.0212734	0.0212752	0.0212769	0.0212786	0.0212802	0.0212818	0.0212834	0.0212849	0.0212865	0.0212879	0.0212894	0.0212909	0.0212923	0.0212937	0.021295	0.0212964	0.0212977	0.021299	0.0213003	0.0213016	0.0213028	0.0213041	0.0213053
																				0.0212546	0.0212567	0.0212587	0.0212607	0.0212626	0.0212645	0.0212663	0.0212681	0.0212699	0.0212716	0.0212734	0.021275	0.0212767	0.0212783	0.0212799	0.0212814	0.021283	0.0212845	0.021286	0.0212875	0.0212889	0.0212903	0.0212918	0.0212931	0.0212945	0.0212959	0.0212972	0.0212985	0.0212998	0.0213011
																				0.0212496	0.0212517	0.0212536	0.0212556	0.0212575	0.0212594	0.0212613	0.0212631	0.0212649	0.0212666	0.0212684	0.0212701	0.0212717	0.0212734	0.021275	0.0212766	0.0212782	0.0212798	0.0212813	0.0212828	0.0212843	0.0212858	0.0212873	0.0212887	0.0212901	0.0212916	0.0212929	0.0212943	0.0212957	0.021297
																				0.0212449	0.0212469	0.0212488	0.0212508	0.0212527	0.0212546	0.0212564	0.0212583	0.0212601	0.0212618	0.0212636	0.0212653	0.021267	0.0212687	0.0212704	0.021272	0.0212736	0.0212752	0.0212768	0.0212784	0.0212799	0.0212814	0.021283	0.0212845	0.0212859	0.0212874	0.0212888	0.0212902	0.0212916	0.021293
																				0.0212403	0.0212423	0.0212443	0.0212462	0.0212481	0.02125	0.0212518	0.0212537	0.0212555	0.0212573	0.021259	0.0212608	0.0212625	0.0212642	0.0212659	0.0212676	0.0212692	0.0212709	0.0212725	0.0212741	0.0212757	0.0212772	0.0212788	0.0212803	0.0212818	0.0212833	0.0212848	0.0212863	0.0212877	0.0212892
																				0.021236	0.021238	0.0212399	0.0212418	0.0212437	0.0212456	0.0212474	0.0212493	0.0212511	0.0212529	0.0212547	0.0212564	0.0212582	0.0212599	0.0212616	0.0212633	0.021265	0.0212666	0.0212683	0.0212699	0.0212716	0.0212732	0.0212748	0.0212763	0.0212779	0.0212794	0.021281	0.0212825	0.021284	0.0212854
																				0.0212319	0.0212339	0.0212358	0.0212377	0.0212395	0.0212414	0.0212432	0.0212451	0.0212469	0.0212487	0.0212505	0.0212522	0.021254	0.0212557	0.0212575	0.0212592	0.0212609	0.0212626	0.0212643	0.0212659	0.0212676	0.0212692	0.0212709	0.0212725	0.0212741	0.0212757	0.0212772	0.0212788	0.0212803	0.0212818
																				0.021228	0.0212299	0.0212318	0.0212337	0.0212356	0.0212374	0.0212392	0.0212411	0.0212429	0.0212447	0.0212465	0.0212482	0.02125	0.0212518	0.0212535	0.0212552	0.021257	0.0212587	0.0212604	0.0212621	0.0212638	0.0212654	0.0212671	0.0212687	0.0212704	0.021272	0.0212736	0.0212752	0.0212767	0.0212783
																				0.0212243	0.0212262	0.0212281	0.0212299	0.0212318	0.0212336	0.0212354	0.0212372	0.021239	0.0212408	0.0212426	0.0212444	0.0212462	0.021248	0.0212497	0.0212515	0.0212532	0.0212549	0.0212567	0.0212584	0.0212601	0.0212618	0.0212635	0.0212651	0.0212668	0.0212684	0.0212701	0.0212717	0.0212733	0.0212749
																				0.0212208	0.0212227	0.0212245	0.0212263	0.0212281	0.02123	0.0212318	0.0212336	0.0212354	0.0212372	0.021239	0.0212407	0.0212425	0.0212443	0.021246	0.0212478	0.0212496	0.0212513	0.0212531	0.0212548	0.0212565	0.0212582	0.0212599	0.0212616	0.0212633	0.021265	0.0212666	0.0212683	0.0212699	0.0212715
																				0.0212175	0.0212193	0.0212211	0.0212229	0.0212247	0.0212265	0.0212283	0.0212301	0.0212319	0.0212336	0.0212354	0.0212372	0.021239	0.0212408	0.0212425	0.0212443	0.0212461	0.0212478	0.0212496	0.0212513	0.0212531	0.0212548	0.0212565	0.0212582	0.0212599	0.0212616	0.0212633	0.021265	0.0212666	0.0212683
																				0.0212143	0.0212161	0.0212178	0.0212196	0.0212214	0.0212232	0.0212249	0.0212267	0.0212285	0.0212303	0.021232	0.0212338	0.0212356	0.0212374	0.0212391	0.0212409	0.0212427	0.0212445	0.0212462	0.021248	0.0212497	0.0212515	0.0212532	0.021255	0.0212567	0.0212584	0.0212601	0.0212618	0.0212635	0.0212651
																				0.0212113	0.021213	0.0212148	0.0212165	0.0212183	0.02122	0.0212218	0.0212235	0.0212253	0.021227	0.0212288	0.0212306	0.0212323	0.0212341	0.0212359	0.0212377	0.0212394	0.0212412	0.021243	0.0212448	0.0212465	0.0212483	0.02125	0.0212518	0.0212535	0.0212552	0.021257	0.0212587	0.0212603	0.021262
																				0.0212084	0.0212101	0.0212118	0.0212135	0.0212152	0.021217	0.0212187	0.0212204	0.0212222	0.0212239	0.0212257	0.0212275	0.0212292	0.021231	0.0212328	0.0212345	0.0212363	0.0212381	0.0212399	0.0212416	0.0212434	0.0212452	0.0212469	0.0212487	0.0212504	0.0212522	0.0212539	0.0212556	0.0212573	0.021259
																				0.0212056	0.0212073	0.021209	0.0212107	0.0212124	0.0212141	0.0212158	0.0212175	0.0212192	0.021221	0.0212227	0.0212245	0.0212262	0.021228	0.0212297	0.0212315	0.0212333	0.0212351	0.0212368	0.0212386	0.0212404	0.0212422	0.0212439	0.0212457	0.0212474	0.0212492	0.0212509	0.0212526	0.0212544	0.0212561
																				0.021203	0.0212047	0.0212063	0.021208	0.0212096	0.0212113	0.021213	0.0212147	0.0212164	0.0212181	0.0212198	0.0212216	0.0212233	0.0212251	0.0212268	0.0212286	0.0212304	0.0212321	0.0212339	0.0212357	0.0212375	0.0212392	0.021241	0.0212428	0.0212445	0.0212463	0.021248	0.0212497	0.0212515	0.0212532
																				0.0212005	0.0212021	0.0212038	0.0212054	0.021207	0.0212087	0.0212103	0.021212	0.0212137	0.0212154	0.0212171	0.0212188	0.0212205	0.0212223	0.021224	0.0212258	0.0212275	0.0212293	0.0212311	0.0212328	0.0212346	0.0212364	0.0212382	0.0212399	0.0212417	0.0212434	0.0212452	0.0212469	0.0212486	0.0212504
[truncated: 131 more columns]
