# Supplementary material for: The System’s Point of View applied to Dielectrophoresis in Plate Capacitor and Pointed-versus-Pointed Electrode Chambers
Source: Preprints.org preprint supplement (doi:10.20944/preprints202302.0190.v1), 2023-02-10
Supplement: Supplementary file 4 [file Table 4.xlsx]

## Sheet: Pointed vs. Pointed_0.1-in-1_co
Basic Resistance	Basic Conductance	Mean Resistance	Mean Conductance	k		a_X	a_Y	a_Resistance in Route	a_Conductance along trajectory	a_Trajectory length	a_Delta Cond	a_Step width along trajectory	a_Mid-distance	a_norm. Force (Delta Cond./basic/diSTep)		b_X	b_Y	b_Resistance in Route	b_Conductance along trajectory	b_Trajectory length	b_Delta Cond	b_Step width along trajectory	b_Mid-distance	b_norm. Force (Delta Cond./basic/diSTep)		c_X	c_Y	c_Resistance in Routh	c_Conductance along trajectory	c_Trajectory length	c_Delta Cond	c_Step width along trajectory	c_Mid-distance	c_norm. Force (Delta Cond./basic/diSTep)		d_X	d_Y	d_Resistance in Routh	d_Conductance along trajectory	d_Trajectory length	d_Delta Cond	d_Step width along trajectory	d_Mid-distance	d_norm. Force (Delta Cond./basic/diSTep)		e_X	e_Y	e_Resistance in Routh	e_Conductance along trajectory
4.72878	0.211471	4.83804	0.2072	0.211471		0	-0.40201	4.78301	0.209073	0	1.13456e-05	0.00045683	0.000228415	0.117441		0.0100503	0.40201	4.78298	0.209075	0	1.13381e-05	0.000456853	0.000228427	0.117358		-0.40201	0	18.7923	0.0532134	0	0.0075345	0.00045683	0.000228415	77.9919		-0.40201	0.150754	4.99239	0.200305	0	0.000135471	0.00055744	0.00027872	1.1492		-0.40201	0.0100503	18.4837	0.0541016
						0	-0.401553	4.78275	0.209085	0.00045683	1.13456e-05	0.00045683	0.000685244	0.117441		0.0100549	0.401553	4.78272	0.209086	0.000456853	1.13381e-05	0.000456854	0.00068528	0.117358		-0.401553	0	16.4615	0.0607479	0.00045683	0.0075345	0.00045683	0.000685244	77.9919		-0.401553	0.151073	4.98901	0.20044	0.00055744	0.000135649	0.000558197	0.000836538	1.14916		-0.401553	0.010056	16.2101	0.0616898
						0	-0.401096	4.78249	0.209096	0.000913659	1.13456e-05	0.00045683	0.00114207	0.117441		0.0100596	0.401096	4.78246	0.209097	0.000913707	1.13381e-05	0.000456855	0.00114213	0.117358		-0.401096	0	14.6451	0.0682824	0.000913659	0.0075345	0.00045683	0.00114207	77.9919		-0.401096	0.151394	4.98564	0.200576	0.00111564	0.000135836	0.00055899	0.00139513	1.14911		-0.401096	0.0100621	14.4346	0.069278
						0	-0.40064	4.78223	0.209107	0.00137049	1.13456e-05	0.00045683	0.0015989	0.117441		0.0100644	0.40064	4.7822	0.209109	0.00137056	1.13381e-05	0.000456855	0.00159899	0.117358		-0.40064	0	13.1897	0.0758169	0.00137049	0.0075345	0.00045683	0.0015989	77.9919		-0.40064	0.151716	4.98226	0.200712	0.00167463	0.000136031	0.000559822	0.00195454	1.14905		-0.40064	0.0100688	13.0096	0.0768663
						0	-0.400183	4.78197	0.209119	0.00182732	1.13456e-05	0.00045683	0.00205573	0.117441		0.0100692	0.400183	4.78194	0.20912	0.00182742	1.13382e-05	0.000456856	0.00205584	0.117358		-0.400183	0	11.9974	0.0833514	0.00182732	0.0075345	0.00045683	0.00205573	77.9919		-0.400183	0.15204	4.97889	0.200848	0.00223445	0.000136236	0.000560694	0.0025148	1.14898		-0.400183	0.0100759	11.8407	0.0844548
						0	-0.399726	4.78171	0.20913	0.00228415	1.13456e-05	0.00045683	0.00251256	0.117441		0.0100742	0.399726	4.78168	0.209131	0.00228427	1.13382e-05	0.000456857	0.0025127	0.117358		-0.399726	0	11.0028	0.0908859	0.00228415	0.0075345	0.00045683	0.00251256	77.9919		-0.399726	0.152365	4.97552	0.200984	0.00279514	0.000136449	0.00056161	0.00307595	1.14891		-0.399726	0.0100836	10.8644	0.0920434
						0	-0.399269	4.78145	0.209141	0.00274098	1.13456e-05	0.00045683	0.00296939	0.117441		0.0100792	0.399269	4.78142	0.209143	0.00274113	1.13382e-05	0.000456858	0.00296956	0.117358		-0.399269	0	10.1605	0.0984204	0.00274098	0.0075345	0.00045683	0.00296939	77.9919		-0.399269	0.152691	4.97214	0.201121	0.00335675	0.000129325	0.000562572	0.00363804	1.08706		-0.399269	0.010092	10.0369	0.0996322
						0	-0.398812	4.78119	0.209153	0.00319781	1.13456e-05	0.00045683	0.00342622	0.117441		0.0100843	0.398812	4.78117	0.209154	0.00319799	1.13382e-05	0.000456859	0.00342642	0.117358		-0.398812	0	9.43798	0.105955	0.00319781	0.0075345	0.00045683	0.00342622	77.9919		-0.398812	0.15302	4.96894	0.20125	0.00391932	0.000123727	0.000563583	0.00420112	1.03814		-0.398812	0.010101	9.32652	0.107221
						0	-0.398355	4.78093	0.209164	0.00365464	1.13456e-05	0.00045683	0.00388305	0.117441		0.0100895	0.398355	4.78091	0.209165	0.00365485	1.13383e-05	0.000456861	0.00388328	0.117358		-0.398355	0	8.8114	0.113489	0.00365464	0.0075345	0.00045683	0.00388305	77.9919		-0.398355	0.15335	4.96589	0.201374	0.00448291	0.000123942	0.000564646	0.00476523	1.03799		-0.398355	0.0101107	8.71002	0.11481
						0	-0.397899	4.78067	0.209176	0.00411147	1.13456e-05	0.00045683	0.00433988	0.117441		0.0100948	0.397899	4.78065	0.209177	0.00411171	1.13383e-05	0.000456862	0.00434014	0.117358		-0.397899	0	8.26283	0.121024	0.00411147	0.0075345	0.00045683	0.00433988	77.9919		-0.397899	0.153682	4.96284	0.201498	0.00504755	0.000124168	0.000565765	0.00533044	1.03782		-0.397899	0.0101211	8.16995	0.1224
						0	-0.397442	4.78041	0.209187	0.0045683	1.13456e-05	0.00045683	0.00479671	0.117441		0.0101002	0.397442	4.78039	0.209188	0.00456857	1.13383e-05	0.000456863	0.004797	0.117358		-0.397442	0	7.77857	0.128558	0.0045683	0.0075345	0.00045683	0.00479671	77.9919		-0.397442	0.154015	4.95978	0.201622	0.00561332	0.000124405	0.000566944	0.00589679	1.03764		-0.397442	0.0101325	7.69294	0.129989
						0	-0.396985	4.78016	0.209198	0.00502513	5.89062e-06	0.00045683	0.00525354	0.0609755		0.0101058	0.396985	4.78013	0.209199	0.00502543	5.88549e-06	0.000456865	0.00525387	0.0609178		-0.396985	0	7.34792	0.136093	0.00502513	0.0019875	0.00045683	0.00525354	20.5732		-0.396985	0.154351	4.95672	0.201746	0.00618026	0.000101999	0.000568187	0.00646436	0.848898		-0.396985	0.0101448	7.26802	0.137589
						0	-0.396528	4.78002	0.209204	0.00548196	5.89062e-06	0.00045683	0.00571037	0.0609755		0.0101114	0.396528	4.77999	0.209205	0.0054823	5.88643e-06	0.000456867	0.00571073	0.0609272		-0.396528	0	7.24216	0.13808	0.00548196	0.0019875	0.00045683	0.00571037	20.5732		-0.396528	0.154689	4.95422	0.201848	0.00674845	0.00010074	0.000571831	0.00703436	0.83307		-0.396528	0.0101581	7.16671	0.139534
						0	-0.396071	4.77989	0.20921	0.00593878	5.89062e-06	0.00045683	0.0061672	0.0609755		0.0101173	0.396071	4.77986	0.209211	0.00593917	5.88649e-06	0.00045687	0.0061676	0.0609274		-0.396071	0	7.1394	0.140068	0.00593878	0.0019875	0.00045683	0.0061672	20.5732		-0.396071	0.155033	4.95175	0.201949	0.00732028	9.39461e-05	0.000575737	0.00760815	0.771621		-0.396071	0.0101719	7.06818	0.141479
						0	-0.395614	4.77975	0.209216	0.00639561	5.89062e-06	0.00045683	0.00662403	0.0609755		0.0101234	0.395614	4.77973	0.209217	0.00639604	5.88656e-06	0.000456874	0.00662447	0.0609277		-0.395614	0	7.03951	0.142055	0.00639561	0.0019875	0.00045683	0.00662403	20.5732		-0.395614	0.155383	4.94944	0.202043	0.00789602	9.46788e-05	0.000579931	0.00818598	0.772015		-0.395614	0.0101861	6.97231	0.143425
						0	-0.395158	4.77962	0.209222	0.00685244	5.89062e-06	0.00045683	0.00708086	0.0609755		0.0101297	0.395158	4.77959	0.209223	0.00685291	5.88664e-06	0.000456877	0.00708135	0.060928		-0.395158	0	6.94238	0.144043	0.00685244	0.0019875	0.00045683	0.00708086	20.5732		-0.395158	0.155741	4.94713	0.202138	0.00847595	9.66079e-05	0.000584444	0.00876817	0.781662		-0.395158	0.010201	6.87899	0.14537
						0	-0.394701	4.77948	0.209228	0.00730927	5.89062e-06	0.00045683	0.00753769	0.0609755		0.0101363	0.394701	4.77946	0.209229	0.00730979	5.88672e-06	0.000456882	0.00753823	0.0609282		-0.394701	0	6.84789	0.14603	0.00730927	0.0019875	0.00045683	0.00753769	20.5732		-0.394701	0.156105	4.94476	0.202234	0.00906039	9.75902e-05	0.000589258	0.00935502	0.783158		-0.394701	0.0102165	6.78813	0.147316
						0	-0.394244	4.77935	0.209234	0.0077661	5.89062e-06	0.00045683	0.00799452	0.0609755		0.0101433	0.394244	4.77932	0.209235	0.00776667	5.88681e-06	0.000456887	0.00799511	0.0609285		-0.394244	0	6.75594	0.148018	0.0077661	0.0019875	0.00045683	0.00799452	20.5732		-0.394244	0.156477	4.94238	0.202332	0.00964965	9.84924e-05	0.00059445	0.00994688	0.783496		-0.394244	0.0102327	6.69963	0.149262
						0	-0.393787	4.77921	0.209239	0.00822293	5.89062e-06	0.00045683	0.00845135	0.0609755		0.0101505	0.393787	4.77919	0.209241	0.00822356	5.88691e-06	0.000456893	0.008452	0.0609287		-0.393787	0	6.66643	0.150005	0.00822293	0.0019875	0.00045683	0.00845135	20.5732		-0.393787	0.156858	4.93997	0.20243	0.0102441	9.84236e-05	0.000600067	0.0105441	0.775619		-0.393787	0.0102499	6.61339	0.151208
						0	-0.39333	4.77908	0.209245	0.00867976	5.89062e-06	0.00045683	0.00890818	0.0609755		0.0101581	0.39333	4.77905	0.209246	0.00868045	5.88702e-06	0.0004569	0.0089089	0.060929		-0.39333	0	6.57926	0.151993	0.00867976	0.0019875	0.00045683	0.00890818	20.5732		-0.39333	0.157247	4.93757	0.202529	0.0108442	9.14268e-05	0.000606162	0.0111472	0.713237		-0.39333	0.0102683	6.52932	0.153155
						0	-0.392873	4.77894	0.209251	0.00913659	5.89062e-06	0.00045683	0.00936501	0.0609755		0.0101661	0.392873	4.77892	0.209252	0.00913735	5.88715e-06	0.000456908	0.0093658	0.0609291		-0.392873	0	6.49434	0.15398	0.00913659	0.0019875	0.00045683	0.00936501	20.5732		-0.392873	0.157645	4.93534	0.20262	0.0114503	9.24274e-05	0.000612792	0.0117567	0.713242		-0.392873	0.0102881	6.44733	0.155103
						0	-0.392417	4.77881	0.209257	0.00959342	5.89062e-06	0.00045683	0.00982184	0.0609755		0.0101746	0.392417	4.77878	0.209258	0.00959426	5.88729e-06	0.000456918	0.00982272	0.0609293		-0.392417	0	6.41158	0.155968	0.00959342	0.0019875	0.00045683	0.00982184	20.5732		-0.392417	0.158054	4.93309	0.202713	0.0120631	9.35037e-05	0.000620025	0.0123731	0.71313		-0.392417	0.0103097	6.36736	0.157051
						0	-0.39196	4.77868	0.209263	0.0100503	3.77293e-06	0.00045683	0.0102787	0.0390547		0.0101836	0.39196	4.77865	0.209264	0.0100512	3.76908e-06	0.000456931	0.0102796	0.0390063		-0.39196	0	6.3309	0.157955	0.0100503	0.00104375	0.00045683	0.0102787	10.8041		-0.39196	0.158473	4.93082	0.202806	0.0126831	8.79707e-05	0.000627939	0.0129971	0.662475		-0.39196	0.0103338	6.29093	0.158959
						0	-0.391503	4.77859	0.209267	0.0105071	3.77293e-06	0.00045683	0.0107355	0.0390547		0.0101932	0.391503	4.77856	0.209268	0.0105081	3.77085e-06	0.000456937	0.0107366	0.0390241		-0.391503	0	6.28934	0.158999	0.0105071	0.00104375	0.00045683	0.0107355	10.8041		-0.391503	0.158904	4.92868	0.202894	0.0133111	8.84425e-05	0.000631189	0.0136267	0.662599		-0.391503	0.0103613	6.25066	0.159983
						0	-0.391046	4.7785	0.209271	0.0109639	3.77293e-06	0.00045683	0.0111923	0.0390547		0.0102031	0.391046	4.77848	0.209272	0.010965	3.77093e-06	0.000456943	0.0111935	0.0390244		-0.391046	0	6.24833	0.160043	0.0109639	0.00104375	0.00045683	0.0111923	10.8041		-0.391046	0.159339	4.92653	0.202982	0.0139423	8.59488e-05	0.0006346	0.0142596	0.640455		-0.391046	0.0103892	6.2109	0.161007
						0	-0.390589	4.77842	0.209274	0.0114207	3.77293e-06	0.00045683	0.0116492	0.0390547		0.0102133	0.390589	4.77839	0.209275	0.011422	3.77102e-06	0.00045695	0.0116505	0.0390246		-0.390589	0	6.20784	0.161087	0.0114207	0.00104375	0.00045683	0.0116492	10.8041		-0.390589	0.15978	4.92445	0.203068	0.0145769	8.1666e-05	0.000638185	0.014896	0.605123		-0.390589	0.0104176	6.17163	0.162032
						0	-0.390132	4.77833	0.209278	0.0118776	3.77293e-06	0.00045683	0.012106	0.0390547		0.0102238	0.390132	4.77831	0.209279	0.0118789	3.7711e-06	0.000456958	0.0121074	0.0390248		-0.390132	0	6.16788	0.16213	0.0118776	0.00104375	0.00045683	0.012106	10.8041		-0.390132	0.160225	4.92247	0.20315	0.0152151	8.21574e-05	0.000641956	0.015536	0.605189		-0.390132	0.0104463	6.13286	0.163056
						0	-0.389676	4.77824	0.209282	0.0123344	3.77293e-06	0.00045683	0.0125628	0.0390547		0.0102347	0.389676	4.77822	0.209283	0.0123359	3.7712e-06	0.000456967	0.0125644	0.0390251		-0.389676	0	6.12842	0.163174	0.0123344	0.00104375	0.00045683	0.0125628	10.8041		-0.389676	0.160676	4.92048	0.203232	0.015857	8.33689e-05	0.000645927	0.01618	0.610338		-0.389676	0.0104756	6.09457	0.164081
						0	-0.389219	4.77816	0.209286	0.0127912	3.77293e-06	0.00045683	0.0130196	0.0390547		0.0102459	0.389219	4.77813	0.209287	0.0127929	3.7713e-06	0.000456977	0.0130214	0.0390253		-0.389219	0	6.08947	0.164218	0.0127912	0.00104375	0.00045683	0.0130196	10.8041		-0.389219	0.161133	4.91846	0.203316	0.0165029	8.31611e-05	0.000642165	0.016824	0.612383		-0.389219	0.0105054	6.05674	0.165105
						0	-0.388762	4.77807	0.209289	0.0132481	3.77293e-06	0.00045683	0.0134765	0.0390547		0.0102575	0.388762	4.77805	0.209291	0.0132498	3.77142e-06	0.000456988	0.0134783	0.0390255		-0.388762	0	6.05101	0.165262	0.0132481	0.00104375	0.00045683	0.0134765	10.8041		-0.388768	0.16159	4.91645	0.203399	0.0171451	8.265e-05	0.000638174	0.0174642	0.612425		-0.388762	0.0105358	6.01938	0.16613
						0	-0.388305	4.77799	0.209293	0.0137049	3.77293e-06	0.00045683	0.0139333	0.0390547		0.0102695	0.388305	4.77796	0.209294	0.0137068	3.77154e-06	0.000457001	0.0139353	0.0390257		-0.388305	0	6.01304	0.166305	0.0137049	0.00104375	0.00045683	0.0139333	10.8041		-0.388322	0.162047	4.91445	0.203481	0.0177833	7.62995e-05	0.00063418	0.0181004	0.56893		-0.388305	0.0105667	5.98248	0.167155
						0	-0.387848	4.7779	0.209297	0.0141617	3.77293e-06	0.00045683	0.0143901	0.0390547		0.010282	0.387848	4.77787	0.209298	0.0141638	3.77167e-06	0.000457015	0.0143923	0.0390259		-0.387848	0	5.97553	0.167349	0.0141617	0.00104375	0.00045683	0.0143901	10.8041		-0.387882	0.162504	4.91261	0.203558	0.0184175	7.47045e-05	0.000630183	0.0187326	0.560569		-0.387848	0.0105984	5.94601	0.16818
						0	-0.387392	4.77781	0.209301	0.0146185	3.77293e-06	0.00045683	0.014847	0.0390547		0.010295	0.387392	4.77779	0.209302	0.0146208	3.77181e-06	0.000457031	0.0148494	0.039026		-0.387392	0	5.9385	0.168393	0.0146185	0.00104375	0.00045683	0.014847	10.8041		-0.387448	0.16296	4.91081	0.203632	0.0190476	7.42274e-05	0.000626188	0.0193607	0.560542		-0.387392	0.0106309	5.91032	0.169196
						0	-0.386935	4.77773	0.209305	0.0150754	2.55934e-06	0.00045683	0.0153038	0.0264925		0.0103086	0.386935	4.7777	0.209306	0.0150779	2.55597e-06	0.000457049	0.0153064	0.0264449		-0.386935	0	5.90191	0.169437	0.0150754	0.000667406	0.00045683	0.0153038	6.90852		-0.38702	0.163417	4.90902	0.203707	0.0196738	7.16535e-05	0.000622196	0.0199849	0.544577		-0.386935	0.0106642	5.87601	0.170183
						0	-0.386478	4.77767	0.209307	0.0155322	2.55934e-06	0.00045683	0.0157606	0.0264925		0.0103227	0.386478	4.77764	0.209308	0.0155349	2.55893e-06	0.000457061	0.0157635	0.0264748		-0.386478	0	5.87876	0.170104	0.0155322	0.000667406	0.00045683	0.0157606	6.90852		-0.386597	0.163874	4.90729	0.203778	0.020296	7.08304e-05	0.000619551	0.0206058	0.540619		-0.386478	0.0106985	5.85343	0.17084
						0	-0.386021	4.77761	0.20931	0.015989	2.55934e-06	0.00045683	0.0162175	0.0264925		0.0103373	0.386021	4.77759	0.209311	0.015992	2.55903e-06	0.000457075	0.0162205	0.0264751		-0.386021	0	5.85578	0.170771	0.015989	0.000667406	0.00045683	0.0162175	6.90852		-0.386179	0.164331	4.90559	0.203849	0.0209156	6.97096e-05	0.000617231	0.0212242	0.534065		-0.386021	0.0107331	5.83102	0.171497
						0	-0.385564	4.77755	0.209312	0.0164459	2.55934e-06	0.00045683	0.0166743	0.0264925		0.0103523	0.385564	4.77753	0.209313	0.0164491	2.55914e-06	0.000457089	0.0166776	0.0264754		-0.385564	0	5.83299	0.171439	0.0164459	0.000667406	0.00045683	0.0166743	6.90852		-0.385764	0.164788	4.90391	0.203919	0.0215328	6.45426e-05	0.000614896	0.0218403	0.496357		-0.385564	0.0107679	5.80878	0.172153
						0	-0.385107	4.77749	0.209315	0.0169027	2.55934e-06	0.00045683	0.0171311	0.0264925		0.0103677	0.385107	4.77747	0.209316	0.0169061	2.55926e-06	0.000457105	0.0171347	0.0264757		-0.385107	0	5.81037	0.172106	0.0169027	0.000667406	0.00045683	0.0171311	6.90852		-0.385352	0.165245	4.90236	0.203983	0.0221477	6.42996e-05	0.000612548	0.022454	0.496383		-0.385107	0.0108031	5.7867	0.17281
						0	-0.384651	4.77744	0.209317	0.0173595	2.55934e-06	0.00045683	0.0175879	0.0264925		0.0103835	0.384651	4.77741	0.209318	0.0173633	2.55939e-06	0.000457123	0.0175918	0.026476		-0.384651	0	5.78792	0.172774	0.0173595	0.000667406	0.00045683	0.0175879	6.90852		-0.384944	0.165701	4.90082	0.204048	0.0227603	6.45169e-05	0.000610188	0.0230653	0.499987		-0.384651	0.0108385	5.76479	0.173467
						0	-0.384194	4.77738	0.20932	0.0178164	2.55934e-06	0.00045683	0.0180448	0.0264925		0.0103999	0.384194	4.77735	0.209321	0.0178204	2.55952e-06	0.000457142	0.0180489	0.0264762		-0.384194	0	5.76565	0.173441	0.0178164	0.000667406	0.00045683	0.0180448	6.90852		-0.384539	0.166158	4.89927	0.204112	0.0233704	6.44575e-05	0.0006079	0.0236744	0.501406		-0.384194	0.0108743	5.74305	0.174124
						0	-0.383737	4.77732	0.209322	0.0182732	2.55934e-06	0.00045683	0.0185016	0.0264925		0.0104168	0.383737	4.77729	0.209324	0.0182775	2.55966e-06	0.000457164	0.0185061	0.0264765		-0.383737	0	5.74355	0.174108	0.0182732	0.000667406	0.00045683	0.0185016	6.90852		-0.384138	0.166615	4.89772	0.204177	0.0239783	6.42195e-05	0.000605635	0.0242812	0.501424		-0.383737	0.0109104	5.72146	0.174781
						0	-0.38328	4.77726	0.209325	0.01873	2.55934e-06	0.00045683	0.0189584	0.0264925		0.0104343	0.38328	4.77724	0.209326	0.0187347	2.55982e-06	0.000457188	0.0189633	0.0264767		-0.38328	0	5.72162	0.174776	0.01873	0.000667406	0.00045683	0.0189584	6.90852		-0.383741	0.167072	4.89618	0.204241	0.024584	6.24063e-05	0.00060336	0.0248857	0.489104		-0.38328	0.0109469	5.70004	0.175437
						0	-0.382823	4.7772	0.209328	0.0191868	2.55934e-06	0.00045683	0.0194153	0.0264925		0.0104524	0.382823	4.77718	0.209329	0.0191919	2.55999e-06	0.000457215	0.0194205	0.0264769		-0.382823	0	5.69985	0.175443	0.0191868	0.000667406	0.00045683	0.0194153	6.90852		-0.383347	0.167529	4.89468	0.204303	0.0251873	5.86571e-05	0.000601076	0.0254879	0.461467		-0.382823	0.0109837	5.6788	0.176094
						0	-0.382366	4.77714	0.20933	0.0196437	2.55934e-06	0.00045683	0.0198721	0.0264925		0.0104711	0.382366	4.77712	0.209331	0.0196491	2.56017e-06	0.000457245	0.0198777	0.026477		-0.382366	0	5.67825	0.176111	0.0196437	0.000667406	0.00045683	0.0198721	6.90852		-0.382956	0.167986	4.89328	0.204362	0.0257884	5.84339e-05	0.000598783	0.0260878	0.461471		-0.382366	0.0110209	5.65843	0.176728
						0	-0.38191	4.77709	0.209333	0.0201005	1.7522e-06	0.00045683	0.0203289	0.0181375		0.0104906	0.38191	4.77706	0.209334	0.0201063	1.74898e-06	0.000457279	0.020335	0.0180864		-0.38191	0	5.65681	0.176778	0.0201005	0.000469743	0.00045683	0.0203289	4.86245		-0.382569	0.168442	4.89188	0.20442	0.0263872	5.82087e-05	0.000596484	0.0266854	0.461465		-0.38191	0.0110586	5.6382	0.177362
						0	-0.381453	4.77705	0.209334	0.0205573	1.7522e-06	0.00045683	0.0207857	0.0181375		0.0105109	0.381453	4.77702	0.209336	0.0205636	1.75348e-06	0.000457305	0.0207923	0.018132		-0.381453	0	5.64182	0.177248	0.0205573	0.000469743	0.00045683	0.0207857	4.86245		-0.382185	0.168899	4.89049	0.204479	0.0269837	5.76818e-05	0.000594178	0.0272808	0.459062		-0.381453	0.0110967	5.62351	0.177825
						0	-0.380996	4.77701	0.209336	0.0210142	1.7522e-06	0.00045683	0.0212426	0.0181375		0.0105318	0.380996	4.77698	0.209337	0.0210209	1.75367e-06	0.000457334	0.0212496	0.0181328		-0.380996	0	5.62691	0.177718	0.0210142	0.000469743	0.00045683	0.0212426	4.86245		-0.381805	0.169356	4.88911	0.204536	0.0275779	5.66871e-05	0.000592058	0.0278739	0.452761		-0.380996	0.011135	5.6089	0.178288
						0	-0.380539	4.77697	0.209338	0.021471	1.7522e-06	0.00045683	0.0216994	0.0181375		0.0105532	0.380539	4.77694	0.209339	0.0214782	1.75383e-06	0.000457365	0.0217069	0.0181331		-0.380539	0	5.61207	0.178187	0.021471	0.000469743	0.00045683	0.0216994	4.86245		-0.381429	0.169813	4.88775	0.204593	0.0281699	5.51101e-05	0.00059044	0.0284651	0.441372		-0.380539	0.0111735	5.59436	0.178751
						0	-0.380082	4.77693	0.20934	0.0219278	1.7522e-06	0.00045683	0.0221562	0.0181375		0.0105753	0.380082	4.7769	0.209341	0.0219356	1.754e-06	0.000457399	0.0221643	0.0181335		-0.380082	0	5.59732	0.178657	0.0219278	0.000469743	0.00045683	0.0221562	4.86245		-0.381055	0.17027	4.88644	0.204648	0.0287604	5.20143e-05	0.000588812	0.0290548	0.417729		-0.380082	0.0112121	5.5799	0.179215
						0	-0.379625	4.77689	0.209341	0.0223847	1.7522e-06	0.00045683	0.0226131	0.0181375		0.0105982	0.379625	4.77686	0.209343	0.022393	1.75418e-06	0.000457437	0.0226217	0.0181339		-0.379625	0	5.58264	0.179127	0.0223847	0.000469743	0.00045683	0.0226131	4.86245		-0.380683	0.170726	4.8852	0.2047	0.0293492	5.21953e-05	0.000587174	0.0296428	0.420352		-0.379625	0.011251	5.56552	0.179678
						0	-0.379169	4.77685	0.209343	0.0228415	1.7522e-06	0.00045683	0.0230699	0.0181375		0.0106217	0.379169	4.77682	0.209344	0.0228504	1.75437e-06	0.00045748	0.0230792	0.0181342		-0.379169	0	5.56804	0.179596	0.0228415	0.000469743	0.00045683	0.0230699	4.86245		-0.380314	0.171183	4.88395	0.204752	0.0299363	5.21833e-05	0.000585603	0.0302291	0.421384		-0.379169	0.0112901	5.5512	0.180141
						0	-0.378712	4.77681	0.209345	0.0232983	1.7522e-06	0.00045683	0.0235267	0.0181375		0.0106461	0.378712	4.77678	0.209346	0.0233079	1.75458e-06	0.000457526	0.0235367	0.0181345		-0.378712	0	5.55351	0.180066	0.0232983	0.000469743	0.00045683	0.0235267	4.86245		-0.379948	0.17164	4.88271	0.204804	0.0305219	5.20468e-05	0.000584052	0.030814	0.421397		-0.378712	0.0113293	5.53696	0.180604
						0	-0.378255	4.77677	0.209347	0.0237551	1.7522e-06	0.00045683	0.0239836	0.0181375		0.0106714	0.378255	4.77674	0.209348	0.0237655	1.7548e-06	0.000457579	0.0239942	0.0181347		-0.378255	0	5.53906	0.180536	0.0237551	0.000469743	0.00045683	0.0239836	4.86245		-0.379584	0.172097	4.88147	0.204857	0.031106	5.19089e-05	0.000582493	0.0313972	0.421406		-0.378255	0.0113688	5.52279	0.181068
						0	-0.377798	4.77673	0.209348	0.024212	1.7522e-06	0.00045683	0.0244404	0.0181375		0.0106975	0.377798	4.7767	0.20935	0.024223	1.75504e-06	0.000457638	0.0244519	0.0181349		-0.377798	0	5.52469	0.181006	0.024212	0.000469743	0.00045683	0.0244404	4.86245		-0.379223	0.172554	4.88023	0.204908	0.0316885	5.09244e-05	0.000580926	0.031979	0.414528		-0.377798	0.0114085	5.5091	0.181518
						0	-0.377341	4.77669	0.20935	0.0246688	1.7522e-06	0.00045683	0.0248972	0.0181375		0.0107247	0.377341	4.77666	0.209351	0.0246807	1.75531e-06	0.000457704	0.0249095	0.018135		-0.377341	0	5.51039	0.181475	0.0246688	0.000469743	0.00045683	0.0248972	4.86245		-0.378864	0.173011	4.87902	0.204959	0.0322694	4.77445e-05	0.000579352	0.0325591	0.3897		-0.377341	0.0114485	5.49553	0.181966
						0	-0.376884	4.77665	0.209352	0.0251256	1.16889e-06	0.00045683	0.025354	0.0120995		0.010753	0.376884	4.77662	0.209353	0.0251384	1.1682e-06	0.000457779	0.0253673	0.0120673		-0.376884	0	5.49616	0.181945	0.0251256	0.000350374	0.00045683	0.025354	3.62683		-0.378508	0.173467	4.87788	0.205007	0.0328488	4.76151e-05	0.00057777	0.0331377	0.389707		-0.376884	0.0114886	5.48202	0.182415
						0	-0.376428	4.77662	0.209353	0.0255825	1.16889e-06	0.00045683	0.0258109	0.0120995		0.0107825	0.376428	4.77659	0.209354	0.0255962	1.16986e-06	0.000457842	0.0258251	0.0120828		-0.376428	0	5.4856	0.182296	0.0255825	0.000350374	0.00045683	0.0258109	3.62683		-0.378154	0.173924	4.87675	0.205055	0.0334265	4.74845e-05	0.000576181	0.0337146	0.38971		-0.376428	0.011529	5.47163	0.182761
						0	-0.375971	4.77659	0.209354	0.0260393	1.16889e-06	0.00045683	0.0262677	0.0120995		0.0108129	0.375971	4.77657	0.209355	0.026054	1.17269e-06	0.00045791	0.026283	0.0121102		-0.375971	0	5.47507	0.182646	0.0260393	0.000350374	0.00045683	0.0262677	3.62683		-0.377803	0.174381	4.87562	0.205102	0.0340027	4.73527e-05	0.000574585	0.03429	0.389708		-0.375971	0.0115695	5.46128	0.183107
						0	-0.375514	4.77657	0.209355	0.0264961	1.16889e-06	0.00045683	0.0267245	0.0120995		0.0108443	0.375514	4.77654	0.209357	0.0265119	1.17294e-06	0.000457987	0.0267409	0.0121108		-0.375514	0	5.46459	0.182996	0.0264961	0.000350374	0.00045683	0.0267245	3.62683		-0.377454	0.174838	4.87449	0.20515	0.0345773	4.72198e-05	0.000572983	0.0348638	0.3897		-0.375514	0.0116102	5.45097	0.183453
						0	-0.375057	4.77654	0.209357	0.0269529	1.16889e-06	0.00045683	0.0271814	0.0120995		0.0108769	0.375057	4.77651	0.209358	0.0269699	1.17322e-06	0.000458072	0.0271989	0.0121114		-0.375057	0	5.45415	0.183347	0.0269529	0.000350374	0.00045683	0.0271814	3.62683		-0.377108	0.175295	4.87337	0.205197	0.0351503	4.69293e-05	0.000571375	0.035436	0.388393		-0.375057	0.011651	5.44071	0.1838
						0	-0.3746	4.77651	0.209358	0.0274098	1.16889e-06	0.00045683	0.0276382	0.0120995		0.0109106	0.3746	4.77649	0.209359	0.027428	1.17351e-06	0.000458167	0.027657	0.0121119		-0.3746	0	5.44375	0.183697	0.0274098	0.000350374	0.00045683	0.0276382	3.62683		-0.376765	0.175752	4.87226	0.205244	0.0357217	4.33759e-05	0.000569885	0.0360066	0.359924		-0.3746	0.0116919	5.43047	0.184146
						0	-0.374143	4.77649	0.209359	0.0278666	1.16889e-06	0.00045683	0.028095	0.0120995		0.0109456	0.374143	4.77646	0.20936	0.0278861	1.17383e-06	0.000458274	0.0281153	0.0121123		-0.374143	0	5.43338	0.184047	0.0278666	0.000350374	0.00045683	0.028095	3.62683		-0.376424	0.176208	4.87123	0.205287	0.0362915	4.3341e-05	0.000568686	0.0365759	0.360392		-0.374143	0.011733	5.42028	0.184492
						0	-0.373687	4.77646	0.20936	0.0283234	1.16889e-06	0.00045683	0.0285519	0.0120995		0.0109819	0.373687	4.77643	0.209361	0.0283444	1.17417e-06	0.000458395	0.0285736	0.0121127		-0.373687	0	5.42306	0.184398	0.0283234	0.000350374	0.00045683	0.0285519	3.62683		-0.376086	0.176665	4.8702	0.20533	0.0368602	4.32525e-05	0.000567507	0.037144	0.360403		-0.373687	0.0117742	5.41013	0.184839
						0	-0.37323	4.77643	0.209361	0.0287803	1.16889e-06	0.00045683	0.0290087	0.0120995		0.0110198	0.37323	4.77641	0.209362	0.0288028	1.17455e-06	0.000458532	0.0290321	0.0121129		-0.37323	0	5.41277	0.184748	0.0287803	0.000350374	0.00045683	0.0290087	3.62683		-0.375749	0.177122	4.86917	0.205374	0.0374277	4.31632e-05	0.000566322	0.0377109	0.360412		-0.37323	0.0118156	5.40024	0.185177
						0	-0.372773	4.77641	0.209362	0.0292371	1.16889e-06	0.00045683	0.0294655	0.0120995		0.0110593	0.372773	4.77638	0.209364	0.0292613	1.17496e-06	0.000458689	0.0294907	0.012113		-0.372773	0	5.40253	0.185099	0.0292371	0.000350374	0.00045683	0.0294655	3.62683		-0.375414	0.177579	4.86815	0.205417	0.0379941	4.3073e-05	0.00056513	0.0382766	0.360418		-0.372773	0.0118571	5.39045	0.185513
						0	-0.372316	4.77638	0.209364	0.0296939	1.16889e-06	0.00045683	0.0299223	0.0120995		0.0111005	0.372316	4.77635	0.209365	0.02972	1.17541e-06	0.000458869	0.0299495	0.0121129		-0.372316	0	5.39232	0.185449	0.0296939	0.000350374	0.00045683	0.0299223	3.62683		-0.375082	0.178036	4.86713	0.20546	0.0385592	4.2982e-05	0.000563931	0.0388412	0.36042		-0.372316	0.0118987	5.3807	0.185849
						0	-0.371859	4.77635	0.209365	0.0301508	7.23699e-07	0.00045683	0.0303792	0.00749122		0.0111437	0.371859	4.77633	0.209366	0.0301789	7.26741e-07	0.000459076	0.0304084	0.00748589		-0.371859	0	5.38215	0.185799	0.0301508	0.000271922	0.00045683	0.0303792	2.81475		-0.374751	0.178493	4.86611	0.205503	0.0391231	4.0918e-05	0.000562727	0.0394045	0.343848		-0.371859	0.0119405	5.37098	0.186186
						0	-0.371402	4.77634	0.209366	0.0306076	7.23699e-07	0.00045683	0.030836	0.00749122		0.0111891	0.371402	4.77631	0.209367	0.030638	7.27166e-07	0.000459262	0.0308676	0.00748725		-0.371402	0	5.37429	0.186071	0.0306076	0.000271922	0.00045683	0.030836	2.81475		-0.374422	0.178949	4.86514	0.205544	0.0396859	3.97499e-05	0.000561516	0.0399666	0.334752		-0.371402	0.0119824	5.36322	0.186455
						0	-0.370946	4.77632	0.209366	0.0310644	7.23699e-07	0.00045683	0.0312928	0.00749122		0.0112363	0.370946	4.77629	0.209367	0.0310972	7.2885e-07	0.000459473	0.031327	0.00750115		-0.370946	0	5.36644	0.186343	0.0310644	0.000271922	0.00045683	0.0312928	2.81475		-0.374096	0.179406	4.8642	0.205584	0.0402474	3.96645e-05	0.000560299	0.0405275	0.334758		-0.370946	0.0120245	5.35549	0.186724
						0	-0.370489	4.7763	0.209367	0.0315212	7.23699e-07	0.00045683	0.0317497	0.00749122		0.0112855	0.370489	4.77628	0.209368	0.0315567	7.31796e-07	0.000459712	0.0317866	0.00752755		-0.370489	0	5.35862	0.186615	0.0315212	0.000271922	0.00045683	0.0317497	2.81475		-0.373771	0.179863	4.86326	0.205623	0.0408077	3.95783e-05	0.000559077	0.0410872	0.334761		-0.370489	0.0120666	5.34778	0.186994
						0	-0.370032	4.77629	0.209368	0.0319781	7.23699e-07	0.00045683	0.0322065	0.00749122		0.0113369	0.370032	4.77626	0.209369	0.0320164	7.32328e-07	0.000459986	0.0322464	0.00752853		-0.370032	0	5.35083	0.186887	0.0319781	0.000271922	0.00045683	0.0322065	2.81475		-0.373449	0.18032	4.86233	0.205663	0.0413667	3.94913e-05	0.000557849	0.0416457	0.334761		-0.370032	0.0121089	5.34009	0.187263
						0	-0.369575	4.77627	0.209368	0.0324349	7.23699e-07	0.00045683	0.0326633	0.00749122		0.0113907	0.369575	4.77624	0.20937	0.0324764	7.32912e-07	0.000460301	0.0327066	0.00752937		-0.369575	0	5.34305	0.187159	0.0324349	0.000271922	0.00045683	0.0326633	2.81475		-0.373129	0.180777	4.86139	0.205702	0.0419246	3.95829e-05	0.000556615	0.0422029	0.33628		-0.369575	0.0121512	5.33242	0.187532
						0	-0.369118	4.77625	0.209369	0.0328917	7.23699e-07	0.00045683	0.0331201	0.00749122		0.0114471	0.369118	4.77623	0.20937	0.0329367	7.33557e-07	0.000460667	0.033167	0.00753002		-0.369118	0	5.3353	0.187431	0.0328917	0.000271922	0.00045683	0.0331201	2.81475		-0.372811	0.181234	4.86046	0.205742	0.0424812	3.90365e-05	0.00055544	0.0427589	0.33234		-0.369118	0.0121937	5.32477	0.187802
						0	-0.368661	4.77624	0.20937	0.0333486	7.23699e-07	0.00045683	0.033577	0.00749122		0.0115065	0.368661	4.77621	0.209371	0.0333974	7.34273e-07	0.000461094	0.0336279	0.00753039		-0.368661	0	5.32757	0.187703	0.0333486	0.000271922	0.00045683	0.033577	2.81475		-0.372495	0.18169	4.85954	0.205781	0.0430366	3.67533e-05	0.000554284	0.0433138	0.313555		-0.368661	0.0122363	5.31729	0.188066
						0	-0.368205	4.77622	0.209371	0.0338054	7.23699e-07	0.00045683	0.0340338	0.00749122		0.011569	0.368205	4.77619	0.209372	0.0338585	7.35073e-07	0.000461597	0.0340893	0.00753038		-0.368205	0	5.31987	0.187975	0.0338054	0.000271922	0.00045683	0.0340338	2.81475		-0.372181	0.182147	4.85867	0.205818	0.0435909	3.66769e-05	0.000553123	0.0438675	0.31356		-0.368205	0.012279	5.30988	0.188328
						0	-0.367748	4.7762	0.209371	0.0342622	7.23699e-07	0.00045683	0.0344906	0.00749122		0.0116352	0.367748	4.77618	0.209373	0.0343201	7.35972e-07	0.000462195	0.0345512	0.00752983		-0.367748	0	5.31218	0.188247	0.0342622	0.000271922	0.00045683	0.0344906	2.81475		-0.371869	0.182604	4.8578	0.205854	0.0441441	3.64563e-05	0.000551958	0.04442	0.312331		-0.367748	0.0123218	5.3025	0.18859
						0	-0.367291	4.77619	0.209372	0.034719	7.23699e-07	0.00045683	0.0349475	0.00749122		0.0117054	0.367291	4.77616	0.209373	0.0347823	7.36989e-07	0.000462914	0.0350137	0.00752852		-0.367291	0	5.30452	0.188519	0.034719	0.000271922	0.00045683	0.0349475	2.81475		-0.37156	0.183061	4.85694	0.205891	0.044696	3.63873e-05	0.000550978	0.0449715	0.312294		-0.367291	0.0123647	5.29513	0.188853
						0	-0.366834	4.77617	0.209373	0.0351759	3.70332e-07	0.00045683	0.0354043	0.00383342		0.0117802	0.366834	4.77614	0.209374	0.0352452	3.80864e-07	0.000463787	0.0354771	0.00388329		-0.366834	0	5.29688	0.18879	0.0351759	0.000217293	0.00045683	0.0354043	2.24926		-0.371252	0.183518	4.85609	0.205927	0.045247	3.63229e-05	0.000549999	0.045522	0.312296		-0.366834	0.0124077	5.28779	0.189115
						0	-0.366377	4.77616	0.209373	0.0356327	3.70332e-07	0.00045683	0.0358611	0.00383342		0.0118603	0.366377	4.77613	0.209374	0.035709	3.81936e-07	0.000464646	0.0359413	0.00388703		-0.366377	0	5.29079	0.189008	0.0356327	0.000217293	0.00045683	0.0358611	2.24926		-0.370945	0.183975	4.85523	0.205963	0.045797	3.62579e-05	0.000549016	0.0460715	0.312296		-0.366377	0.0124508	5.28176	0.189331
						0	-0.365921	4.77615	0.209373	0.0360895	3.70332e-07	0.00045683	0.036318	0.00383342		0.0119451	0.365921	4.77612	0.209375	0.0361736	3.83144e-07	0.000465671	0.0364064	0.00389073		-0.365921	0	5.28471	0.189225	0.0360895	0.000217293	0.00045683	0.036318	2.24926		-0.370641	0.184431	4.85437	0.206	0.046346	3.46473e-05	0.000548027	0.04662	0.298963		-0.365921	0.012494	5.27576	0.189546
						0	-0.365464	4.77615	0.209374	0.0365464	3.70332e-07	0.00045683	0.0367748	0.00383342		0.0120355	0.365464	4.77612	0.209375	0.0366393	3.84517e-07	0.000466911	0.0368727	0.00389431		-0.365464	0	5.27865	0.189442	0.0365464	0.000217293	0.00045683	0.0367748	2.24926		-0.370338	0.184888	4.85356	0.206034	0.046894	3.36863e-05	0.000547033	0.0471675	0.291198		-0.365464	0.0125373	5.26976	0.189762
						0	-0.365007	4.77614	0.209374	0.0370032	3.70332e-07	0.00045683	0.0372316	0.00383342		0.012132	0.365007	4.77611	0.209376	0.0371062	3.86957e-07	0.000468428	0.0373404	0.00390633		-0.365007	0	5.2726	0.18966	0.0370032	0.000217293	0.00045683	0.0372316	2.24926		-0.370037	0.185345	4.85277	0.206068	0.0474411	3.36254e-05	0.000546035	0.0477141	0.291203		-0.365007	0.0125807	5.26378	0.189978
						0	-0.36455	4.77613	0.209375	0.03746	3.70332e-07	0.00045683	0.0376884	0.00383342		0.0122356	0.36455	4.7761	0.209376	0.0375746	3.90937e-07	0.000470309	0.0378098	0.00393073		-0.36455	0	5.26657	0.189877	0.03746	0.000217293	0.00045683	0.0376884	2.24926		-0.369738	0.185802	4.85197	0.206102	0.0479871	3.36917e-05	0.000545032	0.0482596	0.292314		-0.36455	0.0126242	5.25781	0.190193
						0	-0.364093	4.77612	0.209375	0.0379169	3.70332e-07	0.00045683	0.0381453	0.00383342		0.0123473	0.364093	4.77609	0.209376	0.0380449	3.92978e-07	0.000472678	0.0382813	0.00393145		-0.364093	0	5.26055	0.190094	0.0379169	0.000217293	0.00045683	0.0381453	2.24926		-0.369441	0.186259	4.85118	0.206135	0.0485321	3.36828e-05	0.000544081	0.0488042	0.292748		-0.364093	0.0126678	5.25195	0.190405
						0	-0.363636	4.77611	0.209375	0.0383737	3.70332e-07	0.00045683	0.0386021	0.00383342		0.0124687	0.363636	4.77608	0.209377	0.0385176	3.95394e-07	0.000475716	0.0387555	0.00393035		-0.363636	0	5.25454	0.190311	0.0383737	0.000217293	0.00045683	0.0386021	2.24926		-0.369145	0.186716	4.85039	0.206169	0.0490762	3.36252e-05	0.000543148	0.0493478	0.292749		-0.363636	0.0127115	5.24615	0.190616
						0	-0.36318	4.7761	0.209376	0.0388305	3.70332e-07	0.00045683	0.0390589	0.00383342		0.0126014	0.36318	4.77607	0.209377	0.0389933	3.98295e-07	0.000479693	0.0392332	0.00392636		-0.36318	0	5.24855	0.190529	0.0388305	0.000217293	0.00045683	0.0390589	2.24926		-0.368851	0.187172	4.8496	0.206203	0.0496194	3.35671e-05	0.000542211	0.0498905	0.292748		-0.36318	0.0127553	5.24036	0.190827
						0	-0.362723	4.77609	0.209376	0.0392873	3.70332e-07	0.00045683	0.0395158	0.00383342		0.0127478	0.362723	4.77606	0.209378	0.039473	4.01841e-07	0.000485031	0.0397155	0.00391773		-0.362723	0	5.24257	0.190746	0.0392873	0.000217293	0.00045683	0.0395158	2.24926		-0.368559	0.187629	4.84881	0.206236	0.0501616	3.13847e-05	0.000541271	0.0504322	0.274191		-0.362723	0.0127992	5.23458	0.191037
						0	-0.362266	4.77609	0.209376	0.0397442	3.70332e-07	0.00045683	0.0399726	0.00383342		0.0129107	0.362266	4.77605	0.209378	0.039958	4.0627e-07	0.000492405	0.0402042	0.00390158		-0.362266	0	5.23661	0.190963	0.0397442	0.000217293	0.00045683	0.0399726	2.24926		-0.368269	0.188086	4.84807	0.206268	0.0507028	3.12553e-05	0.000540326	0.050973	0.273538		-0.362266	0.0128432	5.22882	0.191248
						0	-0.361809	4.77608	0.209377	0.040201	8.13349e-08	0.00045683	0.0404294	0.000841922		0.0130945	0.361809	4.77604	0.209378	0.0404504	1.19057e-07	0.00050296	0.0407019	0.00111936		-0.361809	0	5.23065	0.191181	0.040201	0.000177596	0.00045683	0.0404294	1.83835		-0.36798	0.188543	4.84734	0.206299	0.0512432	3.1201e-05	0.000539378	0.0515129	0.273542		-0.361809	0.0128873	5.22306	0.191458
						0	-0.361352	4.77608	0.209377	0.0406578	8.13349e-08	0.00045683	0.0408862	0.000841922		0.0133049	0.361352	4.77604	0.209378	0.0409534	1.25237e-07	0.00051577	0.0412113	0.00114822		-0.361352	0	5.2258	0.191358	0.0406578	0.000177596	0.00045683	0.0408862	1.83835		-0.367694	0.189	4.8466	0.20633	0.0517825	3.11462e-05	0.000538427	0.0520518	0.273544		-0.361352	0.0129314	5.21825	0.191635
						0	-0.360895	4.77607	0.209377	0.0411147	8.13349e-08	0.00045683	0.0413431	0.000841922		0.0135443	0.360895	4.77604	0.209379	0.0414692	1.33294e-07	0.000534377	0.0417364	0.00117953		-0.360895	0	5.22095	0.191536	0.0411147	0.000177596	0.00045683	0.0413431	1.83835		-0.367409	0.189456	4.84587	0.206361	0.052321	3.1091e-05	0.000537472	0.0525897	0.273544		-0.360895	0.0129757	5.21345	0.191812
						0	-0.360439	4.77607	0.209377	0.0415715	8.13349e-08	0.00045683	0.0417999	0.000841922		0.0138216	0.360439	4.77603	0.209379	0.0420036	1.44207e-07	0.000562665	0.0422849	0.00121195		-0.360439	0	5.21612	0.191713	0.0415715	0.000177596	0.00045683	0.0417999	1.83835		-0.367126	0.189913	4.84514	0.206392	0.0528584	3.10353e-05	0.000536514	0.0531267	0.273542		-0.360439	0.01302	5.20866	0.191988
						0	-0.359982	4.77607	0.209377	0.0420283	8.13349e-08	0.00045683	0.0422567	0.000841922		0.0141501	0.359982	4.77603	0.209379	0.0425662	1.5977e-07	0.000608212	0.0428703	0.00124219		-0.359982	0	5.21129	0.191891	0.0420283	0.000177596	0.00045683	0.0422567	1.83835		-0.366844	0.19037	4.84441	0.206423	0.053395	3.05806e-05	0.000535552	0.0536627	0.270018		-0.359982	0.0130645	5.20387	0.192165
						0	-0.359525	4.77607	0.209377	0.0424852	8.13349e-08	0.00045683	0.0427136	0.000841922		0.0145516	0.359525	4.77603	0.209379	0.0431744	1.6335e-07	0.000611416	0.0434801	0.00126337		-0.359525	0	5.20647	0.192069	0.0424852	0.000177596	0.00045683	0.0427136	1.83835		-0.366565	0.190827	4.84369	0.206454	0.0539305	2.90202e-05	0.000534698	0.0541979	0.256649		-0.359525	0.013109	5.19916	0.192339
						0	-0.359068	4.77607	0.209377	0.042942	8.13349e-08	0.00045683	0.0431704	0.000841922		0.0150084	0.359119	4.77602	0.209379	0.0437858	1.75849e-07	0.000550777	0.0440612	0.00150978		-0.359068	0	5.20166	0.192246	0.042942	0.000177596	0.00045683	0.0431704	1.83835		-0.366287	0.191284	4.84301	0.206483	0.0544652	2.90126e-05	0.000533896	0.0547322	0.256969		-0.359068	0.0131536	5.19449	0.192512
						0	-0.358611	4.77606	0.209377	0.0433988	8.13349e-08	0.00045683	0.0436272	0.000841922		0.0154653	0.358811	4.77602	0.209379	0.0443366	1.68771e-07	0.000513253	0.0445932	0.00155494		-0.358611	0	5.19686	0.192424	0.0433988	0.000177596	0.00045683	0.0436272	1.83835		-0.366011	0.191741	4.84233	0.206512	0.0549991	2.89704e-05	0.00053311	0.0552657	0.256972		-0.358611	0.0131984	5.18983	0.192684
						0	-0.358154	4.77606	0.209377	0.0438556	8.13349e-08	0.00045683	0.0440841	0.000841922		0.0159221	0.358577	4.77602	0.20938	0.0448499	1.59805e-07	0.000490567	0.0450952	0.00154043		-0.358154	0	5.19207	0.192601	0.0438556	0.000177596	0.00045683	0.0440841	1.83835		-0.365736	0.192197	4.84165	0.206541	0.0555322	2.89277e-05	0.00053232	0.0557984	0.256975		-0.358154	0.0132432	5.18518	0.192857
						0	-0.357698	4.77606	0.209378	0.0443125	1.6267e-07	0.000913659	0.0447693	0.000841922		0.0163789	0.358398	4.77601	0.20938	0.0453404	1.53054e-07	0.000476998	0.0455789	0.00151732		-0.357698	0	5.18729	0.192779	0.0443125	0.000177596	0.00045683	0.0445409	1.83835		-0.365463	0.192654	4.84098	0.20657	0.0560645	2.88847e-05	0.000531528	0.0563303	0.256975		-0.357698	0.0132881	5.18054	0.19303
						0	-0.356784	4.77606	0.209378	0.0452261						0.0168357	0.358261	4.77601	0.20938	0.0458174	1.47933e-07	0.000468903	0.0460519	0.00149187		-0.357241	0	5.18251	0.192957	0.0447693	0.000177596	0.00045683	0.0449977	1.83835		-0.365191	0.193111	4.8403	0.206599	0.0565961	2.88414e-05	0.000530732	0.0568614	0.256975		-0.357241	0.0133331	5.1759	0.193203
																0.0172926	0.358155	4.77601	0.20938	0.0462863	1.44019e-07	0.000464067	0.0465184	0.00146754		-0.356784	0	5.17775	0.193134	0.0452261	0.000147783	0.00045683	0.0454545	1.52975		-0.364921	0.193568	4.83962	0.206628	0.0571268	2.82357e-05	0.000529932	0.0573918	0.251957		-0.356784	0.0133782	5.17128	0.193376
																0.0177494	0.358074	4.776	0.20938	0.0467504	1.41008e-07	0.000461167	0.046981	0.00144588		-0.356327	0	5.17379	0.193282	0.045683	0.000147783	0.00045683	0.0459114	1.52975		-0.364652	0.194025	4.83896	0.206656	0.0576567	2.69617e-05	0.00052913	0.0579213	0.240954		-0.356327	0.0134234	5.16735	0.193523
																0.0182062	0.35801	4.776	0.20938	0.0472116	1.38674e-07	0.000459423	0.0474413	0.00142736		-0.35587	0	5.16983	0.19343	0.0461398	0.000147783	0.00045683	0.0463682	1.52975		-0.364385	0.194482	4.83833	0.206683	0.0581859	2.69212e-05	0.000528325	0.05845	0.240959		-0.35587	0.0134687	5.16342	0.19367
																0.0186631	0.357962	4.776	0.20938	0.047671	1.38783e-07	0.00045837	0.0479002	0.00143176		-0.355413	0	5.16589	0.193578	0.0465966	0.000147783	0.00045683	0.046825	1.52975		-0.36412	0.194938	4.8377	0.20671	0.0587142	2.68804e-05	0.000527517	0.0589779	0.240962		-0.355413	0.013514	5.1595	0.193817
																0.0191199	0.357924	4.77599	0.209381	0.0481294	1.406e-07	0.000457733	0.0483582	0.00145252		-0.354957	0	5.16195	0.193725	0.0470534	0.000147783	0.00045683	0.0472819	1.52975		-0.363856	0.195395	4.83707	0.206737	0.0592417	2.68393e-05	0.000526706	0.0595051	0.240964		-0.354957	0.0135595	5.15563	0.193963
																0.0195767	0.357895	4.77599	0.209381	0.0485871	1.39556e-07	0.00045735	0.0488158	0.00144294		-0.3545	0	5.15801	0.193873	0.0475103	0.000147783	0.00045683	0.0477387	1.52975		-0.363594	0.195852	4.83644	0.206763	0.0597684	2.6857e-05	0.000525892	0.0600314	0.241496		-0.3545	0.0136051	5.1518	0.194107
																0.0200336	0.357874	4.77599	0.209381	0.0490445	1.65946e-07	0.00045712	0.049273	0.00171666		-0.354043	0	5.15408	0.194021	0.0479671	0.000147783	0.00045683	0.0481955	1.52975		-0.363333	0.196309	4.83582	0.20679	0.0602943	2.68406e-05	0.000525122	0.0605569	0.241702		-0.354043	0.0136508	5.14797	0.194251
																0.0204904	0.357857	4.77598	0.209381	0.0495016	1.69902e-07	0.000456975	0.0497301	0.00175815		-0.353586	0	5.15016	0.194169	0.0484239	0.000147783	0.00045683	0.0486524	1.52975		-0.363074	0.196766	4.83519	0.206817	0.0608194	2.62682e-05	0.000524368	0.0610816	0.236888		-0.353586	0.0136965	5.14415	0.194396
																0.0209472	0.357846	4.77598	0.209381	0.0499585	1.69317e-07	0.000456893	0.050187	0.0017524		-0.353129	0	5.14624	0.194316	0.0488808	0.000147783	0.00045683	0.0491092	1.52975		-0.362817	0.197223	4.83457	0.206843	0.0613438	2.51437e-05	0.000523612	0.0616056	0.227075		-0.353129	0.0137424	5.14033	0.19454
																0.021404	0.357838	4.77598	0.209381	0.0504154	1.68844e-07	0.000456852	0.0506439	0.00174767		-0.352672	0	5.14233	0.194464	0.0493376	0.000147783	0.00045683	0.049566	1.52975		-0.362561	0.197679	4.83399	0.206869	0.0618674	2.51078e-05	0.000522853	0.0621288	0.22708		-0.352672	0.0137883	5.13652	0.194684
																0.0218609	0.357834	4.77597	0.209381	0.0508723	1.68461e-07	0.000456834	0.0511007	0.00174377		-0.352216	0	5.13843	0.194612	0.0497944	0.000147783	0.00045683	0.0500228	1.52975		-0.362307	0.198136	4.8334	0.206894	0.0623903	2.50717e-05	0.000522092	0.0626513	0.227084		-0.352216	0.0138344	5.13272	0.194829
																0.0223177	0.357832	4.77597	0.209382	0.0513291	1.68148e-07	0.00045683	0.0515575	0.00174055		-0.351759	0	5.13453	0.19476	0.0502513	0.000124794	0.00045683	0.0504797	1.29178		-0.362054	0.198593	4.83281	0.206919	0.0629123	2.50363e-05	0.000521329	0.063173	0.227095		-0.351759	0.0138805	5.12892	0.194973
																0.0227745	0.357832	4.77596	0.209382	0.051786	1.67893e-07	0.000456833	0.0520144	0.00173789		-0.351302	0	5.13124	0.194885	0.0507081	0.000124794	0.00045683	0.0509365	1.29178		-0.361803	0.19905	4.83223	0.206944	0.0634337	2.50379e-05	0.000520565	0.063694	0.227442		-0.351302	0.0139267	5.12565	0.195097
																0.0232314	0.357834	4.77596	0.209382	0.0522428	1.67682e-07	0.000456841	0.0524712	0.00173569		-0.350845	0	5.12796	0.195009	0.0511649	0.000124794	0.00045683	0.0513933	1.29178		-0.361553	0.199507	4.83165	0.206969	0.0639542	2.5004e-05	0.000519867	0.0642142	0.22744		-0.350845	0.013973	5.12238	0.195222
																0.0236882	0.357837	4.77596	0.209382	0.0526996	1.68703e-07	0.000456851	0.0529281	0.00174621		-0.350388	0	5.12468	0.195134	0.0516217	0.000124794	0.00045683	0.0518502	1.29178		-0.361305	0.199964	4.83106	0.206994	0.0644741	2.46203e-05	0.000519166	0.0647337	0.224252		-0.350388	0.0140195	5.11916	0.195345
																0.024145	0.357841	4.77595	0.209382	0.0531565	1.74546e-07	0.000456861	0.0533849	0.00180666		-0.349931	0	5.1214	0.195259	0.0520786	0.000124794	0.00045683	0.052307	1.29178		-0.361058	0.20042	4.83049	0.207018	0.0649933	2.34582e-05	0.000518463	0.0652525	0.213956		-0.349931	0.014066	5.11595	0.195467
																0.0246019	0.357847	4.77595	0.209383	0.0536133	1.74439e-07	0.000456871	0.0538418	0.00180551		-0.349475	0	5.11813	0.195384	0.0525354	0.000124794	0.00045683	0.0527638	1.29178		-0.360813	0.200877	4.82994	0.207042	0.0655117	2.34643e-05	0.000517758	0.0657706	0.214304		-0.349475	0.0141126	5.11276	0.195589
																0.0250587	0.357853	4.77594	0.209383	0.0540702	2.00261e-07	0.00045688	0.0542987	0.00207273		-0.349018	0	5.11486	0.195509	0.0529922	0.000124794	0.00045683	0.0532206	1.29178		-0.360569	0.201334	4.82939	0.207065	0.0660295	2.34491e-05	0.000517092	0.066288	0.214441		-0.349018	0.0141594	5.10956	0.195711
																0.0255155	0.35786	4.77594	0.209383	0.0545271	2.04596e-07	0.000456894	0.0547555	0.00211753		-0.348561	0	5.1116	0.195633	0.0534491	0.000124794	0.00045683	0.0536775	1.29178		-0.360327	0.201791	4.82885	0.207089	0.0665466	2.34197e-05	0.000516441	0.0668048	0.214442		-0.348561	0.0142062	5.10637	0.195834
																0.0259723	0.357867	4.77593	0.209383	0.054984	2.04493e-07	0.000456907	0.0552124	0.00211641		-0.348104	0	5.10834	0.195758	0.0539059	0.000124794	0.00045683	0.0541343	1.29178		-0.360086	0.202248	4.8283	0.207112	0.067063	2.33901e-05	0.000515787	0.0673209	0.214442		-0.348104	0.0142531	5.10319	0.195956
																0.0264292	0.357876	4.77593	0.209383	0.0554409	2.04406e-07	0.00045692	0.0556694	0.00211545		-0.347647	0	5.10509	0.195883	0.0543627	0.000124794	0.00045683	0.0545911	1.29178		-0.359847	0.202705	4.82775	0.207136	0.0675788	2.33603e-05	0.000515132	0.0678364	0.214441		-0.347647	0.0143001	5.10001	0.196078
																0.026886	0.357885	4.77593	0.209384	0.0558978	2.04333e-07	0.000456931	0.0561263	0.00211464		-0.34719	0	5.10184	0.196008	0.0548196	0.000124794	0.00045683	0.055048	1.29178		-0.359609	0.203161	4.82721	0.207159	0.0680939	2.32819e-05	0.000514474	0.0683512	0.213995		-0.34719	0.0143473	5.09683	0.1962
																0.0273428	0.357894	4.77592	0.209384	0.0563547	2.0427e-07	0.000456941	0.0565832	0.00211395		-0.346734	0	5.09859	0.196133	0.0552764	0.000106678	0.00045683	0.0555048	1.10426		-0.359372	0.203618	4.82667	0.207182	0.0686084	2.19599e-05	0.000513815	0.0688653	0.202103		-0.346734	0.0143945	5.09366	0.196323
																0.0277997	0.357905	4.77592	0.209384	0.0568117	2.04217e-07	0.000456949	0.0570402	0.00211336		-0.346277	0	5.09582	0.196239	0.0557332	0.000106678	0.00045683	0.0559616	1.10426		-0.359137	0.204075	4.82616	0.207204	0.0691222	2.19322e-05	0.000513154	0.0693788	0.202108		-0.346277	0.0144418	5.09089	0.196429
																0.0282565	0.357915	4.77591	0.209384	0.0572686	2.04172e-07	0.000456957	0.0574971	0.00211285		-0.34582	0	5.09305	0.196346	0.05619	0.000106678	0.00045683	0.0564185	1.10426		-0.358903	0.204532	4.82565	0.207226	0.0696354	2.19043e-05	0.000512491	0.0698916	0.202112		-0.34582	0.0144892	5.08817	0.196534
																0.0287133	0.357926	4.77591	0.209384	0.0577256	2.07405e-07	0.000456964	0.0579541	0.00214628		-0.345363	0	5.09029	0.196453	0.0566469	0.000106678	0.00045683	0.0568753	1.10426		-0.358671	0.204989	4.82514	0.207248	0.0701479	2.18761e-05	0.000511826	0.0704038	0.202114		-0.345363	0.0145367	5.08545	0.196639
																0.0291701	0.357937	4.7759	0.209385	0.0581826	2.12988e-07	0.00045697	0.058411	0.00220402		-0.344906	0	5.08752	0.196559	0.0571037	0.000106678	0.00045683	0.0573321	1.10426		-0.35844	0.205446	4.82463	0.20727	0.0706597	2.18477e-05	0.00051116	0.0709153	0.202115		-0.344906	0.0145843	5.08275	0.196744
																0.029627	0.357948	4.7759	0.209385	0.0586395	2.12963e-07	0.000456976	0.058868	0.00220374		-0.34445	0	5.08476	0.196666	0.0575605	0.000106678	0.00045683	0.0577889	1.10426		-0.358211	0.205902	4.82412	0.207292	0.0711709	2.18336e-05	0.000510492	0.0714261	0.202249		-0.34445	0.014632	5.08004	0.196849
																0.0300838	0.35796	4.77589	0.209385	0.0590965	2.37554e-07	0.00045698	0.059325	0.00245818		-0.343993	0	5.08201	0.196773	0.0580174	0.000106678	0.00045683	0.0582458	1.10426		-0.357983	0.206359	4.82361	0.207314	0.0716814	2.18121e-05	0.000509861	0.0719363	0.202299		-0.343993	0.0146799	5.07734	0.196954
																0.0305406	0.357971	4.77589	0.209385	0.0595535	2.41734e-07	0.000456991	0.059782	0.00250137		-0.343536	0	5.07925	0.196879	0.0584742	0.000106678	0.00045683	0.0587026	1.10426		-0.357757	0.206816	4.8231	0.207335	0.0721912	2.09028e-05	0.000509243	0.0724458	0.194101		-0.343536	0.0147278	5.07464	0.197058
																0.0309975	0.357984	4.77588	0.209385	0.0600105	2.41689e-07	0.000457001	0.060239	0.00250085		-0.343079	0	5.0765	0.196986	0.058931	0.000106678	0.00045683	0.0591594	1.10426		-0.357532	0.207273	4.82262	0.207356	0.0727005	2.05454e-05	0.000508624	0.0729548	0.191015		-0.343079	0.0147759	5.07194	0.197163
																0.0314543	0.357996	4.77588	0.209386	0.0604675	2.41649e-07	0.000457011	0.060696	0.00250039		-0.342622	0	5.07376	0.197093	0.0593878	0.000106678	0.00045683	0.0596163	1.10426		-0.357308	0.20773	4.82214	0.207377	0.0732091	2.05208e-05	0.000508004	0.0734631	0.191019		-0.342622	0.014824	5.06925	0.197268
																0.0319111	0.358009	4.77587	0.209386	0.0609245	2.41615e-07	0.000457019	0.061153	0.0025		-0.342165	0	5.07101	0.197199	0.0598447	0.000106678	0.00045683	0.0600731	1.10426		-0.357086	0.208187	4.82166	0.207397	0.0737171	2.04961e-05	0.000507383	0.0739708	0.191023		-0.342165	0.0148723	5.06656	0.197373
																0.032368	0.358022	4.77586	0.209386	0.0613815	2.41586e-07	0.000457026	0.06161	0.00249965		-0.341709	0	5.06827	0.197306	0.0603015	9.21421e-05	0.00045683	0.0605299	0.95379		-0.356865	0.208643	4.82118	0.207418	0.0742245	2.05071e-05	0.00050676	0.0744779	0.19136		-0.341709	0.0149206	5.06387	0.197477
																0.0328248	0.358036	4.77586	0.209386	0.0618385	2.4156e-07	0.000457033	0.062067	0.00249934		-0.341252	0	5.0659	0.197398	0.0607583	9.21421e-05	0.00045683	0.0609868	0.95379		-0.356646	0.2091	4.82071	0.207438	0.0747312	2.05037e-05	0.000506162	0.0749843	0.191554		-0.341252	0.014969	5.06154	0.197568
																0.0332816	0.358049	4.77585	0.209387	0.0622956	2.41537e-07	0.000457039	0.0625241	0.00249907		-0.340795	0	5.06354	0.19749	0.0612152	9.21421e-05	0.00045683	0.0614436	0.95379		-0.356428	0.209557	4.82023	0.207459	0.0752374	2.04797e-05	0.000505579	0.0754902	0.191551		-0.340795	0.0150176	5.05921	0.197659
																0.0337384	0.358063	4.77585	0.209387	0.0627526	2.48526e-07	0.000457044	0.0629811	0.00257136		-0.340338	0	5.06118	0.197582	0.061672	9.21421e-05	0.00045683	0.0619004	0.95379		-0.356211	0.210014	4.81976	0.207479	0.075743	2.01168e-05	0.000504994	0.0759955	0.188374		-0.340338	0.0150663	5.05689	0.19775
																0.0341953	0.358077	4.77584	0.209387	0.0632096	2.52062e-07	0.000457049	0.0634382	0.00260792		-0.339881	0	5.05882	0.197675	0.0621288	9.21421e-05	0.00045683	0.0623572	0.95379		-0.355996	0.210471	4.81929	0.2075	0.076248	1.93144e-05	0.000504408	0.0765002	0.181071		-0.339881	0.015115	5.05457	0.197841
																0.0346521	0.358091	4.77584	0.209387	0.0636667	2.5205e-07	0.000457053	0.0638952	0.00260777		-0.339424	0	5.05646	0.197767	0.0625857	9.21421e-05	0.00045683	0.0628141	0.95379		-0.355782	0.210927	4.81884	0.207519	0.0767524	1.92942e-05	0.00050382	0.0770043	0.181093		-0.339424	0.0151639	5.05224	0.197932
																0.0351089	0.358106	4.77583	0.209388	0.0641237	2.7536e-07	0.000457057	0.0643523	0.00284892		-0.338968	0	5.05411	0.197859	0.0630425	9.21421e-05	0.00045683	0.0632709	0.95379		-0.355569	0.211384	4.81839	0.207538	0.0772562	1.9274e-05	0.000503266	0.0775078	0.181102		-0.338968	0.0152129	5.04991	0.198023
																0.0355658	0.35812	4.77582	0.209388	0.0645808	2.79335e-07	0.000457067	0.0648093	0.00288998		-0.338511	0	5.05175	0.197951	0.0634993	9.21421e-05	0.00045683	0.0637277	0.95379		-0.355358	0.211841	4.81794	0.207557	0.0777595	1.92533e-05	0.000502724	0.0780108	0.181102		-0.338511	0.015262	5.04759	0.198114
																0.0360226	0.358135	4.77582	0.209388	0.0650379	2.79306e-07	0.000457077	0.0652664	0.00288962		-0.338054	0	5.0494	0.198043	0.0639561	9.21421e-05	0.00045683	0.0641846	0.95379		-0.355148	0.212298	4.8175	0.207577	0.0782622	1.92325e-05	0.000502181	0.0785133	0.181102		-0.338054	0.0153112	5.04527	0.198206
																0.0364794	0.35815	4.77581	0.209388	0.0654949	2.7928e-07	0.000457086	0.0657235	0.00288929		-0.337597	0	5.04706	0.198135	0.064413	9.21421e-05	0.00045683	0.0646414	0.95379		-0.35494	0.212755	4.81705	0.207596	0.0787644	1.92115e-05	0.000501636	0.0790152	0.181101		-0.337597	0.0153605	5.04295	0.198297
																0.0369363	0.358165	4.77581	0.209389	0.065952	2.79257e-07	0.000457094	0.0661806	0.002889		-0.33714	0	5.04471	0.198227	0.0648698	9.21421e-05	0.00045683	0.0650982	0.95379		-0.354733	0.213212	4.81661	0.207615	0.079266	1.91903e-05	0.000501091	0.0795165	0.181099		-0.33714	0.0154099	5.04063	0.198388
																0.0373931	0.358181	4.7758	0.209389	0.0664091	2.79237e-07	0.000457102	0.0666377	0.00288874		-0.336683	0	5.04237	0.19832	0.0653266	8.02977e-05	0.00045683	0.065555	0.831186		-0.354527	0.213668	4.81616	0.207634	0.0797671	1.83904e-05	0.000500544	0.0800174	0.17374		-0.336683	0.0154594	5.03835	0.198478
																0.0378499	0.358196	4.77579	0.209389	0.0668662	2.79219e-07	0.000457109	0.0670948	0.00288851		-0.336227	0	5.04033	0.1984	0.0657835	8.02977e-05	0.00045683	0.0660119	0.831186		-0.354322	0.214125	4.81573	0.207653	0.0802676	1.81331e-05	0.000499997	0.0805176	0.171496		-0.336227	0.015509	5.03633	0.198557
																0.0383067	0.358212	4.77579	0.20939	0.0673233	2.79385e-07	0.000457115	0.0675519	0.00289019		-0.33577	0	5.03829	0.19848	0.0662403	8.02977e-05	0.00045683	0.0664687	0.831186		-0.354119	0.214582	4.81531	0.207671	0.0807676	1.81136e-05	0.000499448	0.0810174	0.1715		-0.33577	0.0155588	5.03431	0.198637
																0.0387636	0.358228	4.77578	0.20939	0.0677805	2.91425e-07	0.00045712	0.068009	0.00301471		-0.335313	0	5.03625	0.19856	0.0666971	8.02977e-05	0.00045683	0.0669255	0.831186		-0.353917	0.215039	4.81489	0.207689	0.0812671	1.80939e-05	0.000498899	0.0815165	0.171502		-0.335313	0.0156086	5.03229	0.198717
																0.0392204	0.358245	4.77577	0.20939	0.0682376	2.91416e-07	0.000457125	0.0684661	0.00301458		-0.334856	0	5.03421	0.198641	0.067154	8.02977e-05	0.00045683	0.0673824	0.831186		-0.353717	0.215496	4.81447	0.207707	0.081766	1.80741e-05	0.000498349	0.0820152	0.171503		-0.334856	0.0156585	5.03028	0.198796
																0.0396772	0.358261	4.77577	0.20939	0.0686947	2.91407e-07	0.00045713	0.0689233	0.00301447		-0.334399	0	5.03218	0.198721	0.0676108	8.02977e-05	0.00045683	0.0678392	0.831186		-0.353517	0.215953	4.81405	0.207725	0.0822643	1.80391e-05	0.000497798	0.0825132	0.17136		-0.334399	0.0157086	5.02826	0.198876
																0.0401341	0.358278	4.77576	0.209391	0.0691518	3.13439e-07	0.000457134	0.0693804	0.00324235		-0.333942	0	5.03015	0.198801	0.0680676	8.02977e-05	0.00045683	0.068296	0.831186		-0.35332	0.216409	4.81364	0.207743	0.0827621	1.80143e-05	0.000497278	0.0830108	0.171304		-0.333942	0.0157588	5.02625	0.198955
																0.0405909	0.358294	4.77575	0.209391	0.069609	3.17205e-07	0.000457144	0.0698375	0.00328122		-0.333486	0	5.02812	0.198882	0.0685244	8.02977e-05	0.00045683	0.0687529	0.831186		-0.353123	0.216866	4.81322	0.207761	0.0832594	1.78914e-05	0.000496769	0.0835078	0.17031		-0.333486	0.015809	5.02424	0.199035
																0.0410477	0.358311	4.77575	0.209391	0.0700661	3.17185e-07	0.000457155	0.0702947	0.00328095		-0.333029	0	5.02609	0.198962	0.0689813	8.02977e-05	0.00045683	0.0692097	0.831186		-0.352928	0.217323	4.81281	0.207779	0.0837562	1.70533e-05	0.00049626	0.0840043	0.162498		-0.333029	0.0158594	5.02223	0.199115
																0.0415045	0.358329	4.77574	0.209392	0.0705233	3.17168e-07	0.000457164	0.0707518	0.0032807		-0.332572	0	5.02406	0.199042	0.0694381	8.02977e-05	0.00045683	0.0696665	0.831186		-0.352734	0.21778	4.81241	0.207796	0.0842524	1.70363e-05	0.00049575	0.0845003	0.162503		-0.332572	0.0159099	5.02023	0.199194
																0.0419614	0.358346	4.77573	0.209392	0.0709804	3.17152e-07	0.000457173	0.071209	0.00328047		-0.332115	0	5.02203	0.199123	0.0698949	8.02977e-05	0.00045683	0.0701233	0.831186		-0.352542	0.218237	4.81202	0.207813	0.0847482	1.70191e-05	0.000495239	0.0849958	0.162507		-0.332115	0.0159605	5.01825	0.199273
																0.0424182	0.358364	4.77572	0.209392	0.0714376	3.17138e-07	0.000457181	0.0716662	0.00328027		-0.331658	0	5.02001	0.199203	0.0703518	7.05186e-05	0.00045683	0.0705802	0.729959		-0.35235	0.218694	4.81162	0.20783	0.0852434	1.70019e-05	0.000494728	0.0854908	0.162509		-0.331658	0.0160113	5.01629	0.199351
																0.042875	0.358382	4.77572	0.209393	0.0718948	3.17126e-07	0.000457189	0.0721234	0.00328008		-0.331201	0	5.01823	0.199273	0.0708086	7.05186e-05	0.00045683	0.071037	0.729959		-0.352161	0.21915	4.81123	0.207847	0.0857382	1.69845e-05	0.000494217	0.0859853	0.162511		-0.331201	0.0160621	5.01453	0.199421
																0.0433319	0.3584	4.77571	0.209393	0.072352	3.22879e-07	0.000457196	0.0725806	0.00333954		-0.330745	0	5.01646	0.199344	0.0712654	7.05186e-05	0.00045683	0.0714938	0.729959		-0.351972	0.219607	4.81083	0.207864	0.0862324	1.6967e-05	0.000493705	0.0864792	0.162512		-0.330745	0.016113	5.01277	0.199491
																0.0437887	0.358418	4.7757	0.209393	0.0728092	3.31028e-07	0.000457202	0.0730378	0.00342378		-0.330288	0	5.01468	0.199414	0.0717222	7.05186e-05	0.00045683	0.0719507	0.729959		-0.351785	0.220064	4.81044	0.207881	0.0867261	1.69976e-05	0.000493193	0.0869727	0.162975		-0.330288	0.0161641	5.01101	0.199561
																0.0442455	0.358437	4.77569	0.209394	0.0732664	3.31022e-07	0.000457208	0.073495	0.00342368		-0.329831	0	5.01291	0.199485	0.0721791	7.05186e-05	0.00045683	0.0724075	0.729959		-0.351599	0.220521	4.81005	0.207898	0.0872193	1.66987e-05	0.000492702	0.0874656	0.160268		-0.329831	0.0162153	5.00925	0.199631
																0.0447024	0.358455	4.77569	0.209394	0.0737236	3.31017e-07	0.000457213	0.0739522	0.00342359		-0.329374	0	5.01114	0.199555	0.0726359	7.05186e-05	0.00045683	0.0728643	0.729959		-0.351414	0.220978	4.80966	0.207915	0.087712	1.60939e-05	0.000492213	0.0879581	0.154617		-0.329374	0.0162666	5.00749	0.199701
																0.0451592	0.358474	4.77568	0.209394	0.0741808	3.51779e-07	0.000457218	0.0744094	0.00363828		-0.328917	0	5.00937	0.199626	0.0730927	7.05186e-05	0.00045683	0.0733212	0.729959		-0.351231	0.221435	4.80929	0.207931	0.0882042	1.60705e-05	0.000491752	0.0884501	0.154537		-0.328917	0.016318	5.00574	0.199771
																0.045616	0.358493	4.77567	0.209395	0.074638	3.55335e-07	0.000457229	0.0748666	0.00367497		-0.32846	0	5.0076	0.199697	0.0735496	7.05186e-05	0.00045683	0.073778	0.729959		-0.351049	0.221891	4.80892	0.207947	0.0886959	1.60559e-05	0.000491302	0.0889416	0.154538		-0.32846	0.0163696	5.00398	0.199841
																0.0460728	0.358512	4.77566	0.209395	0.0750952	3.55324e-07	0.00045724	0.0753239	0.00367477		-0.328004	0	5.00583	0.199767	0.0740064	7.05186e-05	0.00045683	0.0742348	0.729959		-0.350868	0.222348	4.80855	0.207963	0.0891872	1.60412e-05	0.000490851	0.0894327	0.154538		-0.328004	0.0164212	5.00223	0.199911
																0.0465297	0.358531	4.77566	0.209395	0.0755525	3.55315e-07	0.00045725	0.0757811	0.00367459		-0.327547	0	5.00406	0.199838	0.0744632	7.05186e-05	0.00045683	0.0746916	0.729959		-0.350689	0.222805	4.80818	0.207979	0.0896781	1.60264e-05	0.000490399	0.0899233	0.154538		-0.327547	0.016473	5.00051	0.19998
																0.0469865	0.358551	4.77565	0.209396	0.0760097	3.55306e-07	0.00045726	0.0762384	0.00367442		-0.32709	0	5.0023	0.199908	0.0749201	7.05186e-05	0.00045683	0.0751485	0.729959		-0.35051	0.223262	4.80781	0.207995	0.0901685	1.60115e-05	0.000489948	0.0904135	0.154536		-0.32709	0.0165249	4.99879	0.200049
																0.0474433	0.358571	4.77564	0.209396	0.076467	3.55298e-07	0.000457269	0.0766956	0.00367427		-0.326633	0	5.00054	0.199979	0.0753769	6.23514e-05	0.00045683	0.0756053	0.645418		-0.350333	0.223719	4.80744	0.208011	0.0906584	1.59964e-05	0.000489495	0.0909032	0.154534		-0.326633	0.0165769	4.99707	0.200117
																0.0479002	0.358591	4.77563	0.209396	0.0769243	3.55291e-07	0.000457277	0.0771529	0.00367413		-0.326176	0	4.99898	0.200041	0.0758337	6.23514e-05	0.00045683	0.0760621	0.645418		-0.350158	0.224176	4.80707	0.208027	0.0911479	1.56382e-05	0.000489043	0.0913925	0.151213		-0.326176	0.016629	4.99552	0.200179
																0.048357	0.358611	4.77562	0.209397	0.0773815	3.68699e-07	0.000457285	0.0776102	0.00381271		-0.32572	0	4.99742	0.200103	0.0762905	6.23514e-05	0.00045683	0.076519	0.645418		-0.349983	0.224632	4.8067	0.208043	0.091637	1.51872e-05	0.00048859	0.0918813	0.146989		-0.32572	0.0166813	4.99397	0.200241
																0.0488138	0.358631	4.77561	0.209397	0.0778388	3.709e-07	0.000457292	0.0780675	0.00383541		-0.325263	0	4.99586	0.200166	0.0767474	6.23514e-05	0.00045683	0.0769758	0.645418		-0.34981	0.225089	4.80635	0.208058	0.0921256	1.51735e-05	0.000488137	0.0923696	0.146992		-0.325263	0.0167336	4.99243	0.200303
																0.0492707	0.358652	4.77561	0.209397	0.0782961	3.70899e-07	0.000457299	0.0785248	0.00383535		-0.324806	0	4.99431	0.200228	0.0772042	6.23514e-05	0.00045683	0.0774326	0.645418		-0.349638	0.225546	4.806	0.208073	0.0926137	1.51596e-05	0.000487684	0.0928575	0.146994		-0.324806	0.0167861	4.99088	0.200365
																0.0497275	0.358673	4.7756	0.209398	0.0787534	3.70898e-07	0.000457305	0.0789821	0.00383529		-0.324349	0	4.99275	0.20029	0.077661	6.23514e-05	0.00045683	0.0778894	0.645418		-0.349467	0.226003	4.80565	0.208088	0.0931014	1.5111e-05	0.00048723	0.093345	0.146659		-0.324349	0.0168388	4.98934	0.200427
																0.0501843	0.358693	4.77559	0.209398	0.0792107	3.90399e-07	0.00045731	0.0794394	0.00403689		-0.323892	0	4.9912	0.200353	0.0781179	6.23514e-05	0.00045683	0.0783463	0.645418		-0.349298	0.22646	4.8053	0.208103	0.0935886	1.50843e-05	0.000486802	0.093832	0.146528		-0.323892	0.0168915	4.9878	0.200489
																0.0506411	0.358714	4.77558	0.209399	0.079668	3.93746e-07	0.000457322	0.0798967	0.0040714		-0.323435	0	4.98965	0.200415	0.0785747	6.23514e-05	0.00045683	0.0788031	0.645418		-0.349129	0.226917	4.80496	0.208118	0.0940754	1.50712e-05	0.000486383	0.0943186	0.146527		-0.323435	0.0169444	4.98625	0.200551
																0.051098	0.358736	4.77557	0.209399	0.0801253	3.93745e-07	0.000457334	0.080354	0.00407127		-0.322979	0	4.98809	0.200477	0.0790315	6.23514e-05	0.00045683	0.0792599	0.645418		-0.348962	0.227373	4.80461	0.208134	0.0945618	1.50581e-05	0.000485965	0.0948048	0.146526		-0.322979	0.0169974	4.98474	0.200612
																0.0515548	0.358757	4.77556	0.209399	0.0805827	3.93743e-07	0.000457345	0.0808113	0.00407116		-0.322522	0	4.98654	0.20054	0.0794884	6.23514e-05	0.00045683	0.0797168	0.645418		-0.348797	0.22783	4.80426	0.208149	0.0950478	1.47497e-05	0.000485546	0.0952905	0.143649		-0.322522	0.0170506	4.98322	0.200673
																0.0520116	0.358779	4.77555	0.2094	0.08104	3.93742e-07	0.000457356	0.0812687	0.00407105		-0.322065	0	4.98499	0.200602	0.0799452	6.23514e-05	0.00045683	0.0801736	0.645418		-0.348632	0.228287	4.80392	0.208163	0.0955333	1.43218e-05	0.000485127	0.0957759	0.139601		-0.322065	0.0171038	4.98171	0.200734
																0.0524685	0.358801	4.77554	0.2094	0.0814974	3.93741e-07	0.000457366	0.0817261	0.00407095		-0.321608	0	4.98344	0.200664	0.080402	5.54616e-05	0.00045683	0.0806304	0.5741		-0.348469	0.228744	4.80359	0.208178	0.0960184	1.43098e-05	0.000484709	0.0962608	0.139605		-0.321608	0.0171572	4.9802	0.200795
																0.0529253	0.358823	4.77554	0.209401	0.0819547	3.99774e-07	0.000457375	0.0821834	0.00413325		-0.321151	0	4.98207	0.20072	0.0808588	5.54616e-05	0.00045683	0.0810873	0.5741		-0.348307	0.229201	4.80326	0.208192	0.0965031	1.42977e-05	0.00048429	0.0967453	0.139608		-0.321151	0.0172107	4.97883	0.20085
																0.0533821	0.358845	4.77553	0.209401	0.0824121	4.11062e-07	0.000457383	0.0826408	0.00424987		-0.320694	0	4.98069	0.200775	0.0813157	5.54616e-05	0.00045683	0.0815441	0.5741		-0.348146	0.229658	4.80293	0.208206	0.0969874	1.42856e-05	0.000483872	0.0972294	0.13961		-0.320694	0.0172643	4.97746	0.200906
																0.0538389	0.358868	4.77552	0.209401	0.0828695	4.11066e-07	0.000457391	0.0830982	0.00424985		-0.320238	0	4.97932	0.200831	0.0817725	5.54616e-05	0.00045683	0.0820009	0.5741		-0.347987	0.230114	4.8026	0.208221	0.0974713	1.42734e-05	0.000483454	0.097713	0.139612		-0.320238	0.0173181	4.97609	0.200961
																0.0542958	0.35889	4.77551	0.209402	0.0833269	4.11071e-07	0.000457398	0.0835556	0.00424983		-0.319781	0	4.97794	0.200886	0.0822293	5.54616e-05	0.00045683	0.0824577	0.5741		-0.347828	0.230571	4.80227	0.208235	0.0979548	1.42611e-05	0.000483036	0.0981963	0.139612		-0.319781	0.017372	4.97472	0.201016
																0.0547526	0.358913	4.7755	0.209402	0.0837843	4.11075e-07	0.000457405	0.084013	0.00424981		-0.319324	0	4.97657	0.200942	0.0826862	5.54616e-05	0.00045683	0.0829146	0.5741		-0.347671	0.231028	4.80194	0.208249	0.0984378	1.42032e-05	0.000482618	0.0986791	0.139165		-0.319324	0.0174261	4.97336	0.201071
																0.0552094	0.358936	4.77549	0.209403	0.0842417	4.29324e-07	0.000457412	0.0844704	0.00443841		-0.318867	0	4.97519	0.200997	0.083143	5.54616e-05	0.00045683	0.0833714	0.5741		-0.347516	0.231485	4.80161	0.208263	0.0989204	1.4006e-05	0.000482223	0.0991615	0.137345		-0.318867	0.0174802	4.972	0.201126
																0.0556663	0.358959	4.77548	0.209403	0.0846991	4.32464e-07	0.000457424	0.0849278	0.00447075		-0.31841	0	4.97382	0.201053	0.0835998	5.54616e-05	0.00045683	0.0838282	0.5741		-0.347361	0.231942	4.80129	0.208277	0.0994026	1.3515e-05	0.000481837	0.0996436	0.132637		-0.31841	0.0175345	4.97065	0.201181
																0.0561231	0.358982	4.77547	0.209404	0.0851565	4.32472e-07	0.000457437	0.0853852	0.0044707		-0.317953	0	4.97245	0.201108	0.0840566	5.54616e-05	0.00045683	0.0842851	0.5741		-0.347208	0.232398	4.80098	0.208291	0.0998845	1.35046e-05	0.000481452	0.100125	0.132641		-0.317953	0.017589	4.96931	0.201235
																0.0565799	0.359006	4.77546	0.209404	0.085614	4.32479e-07	0.000457449	0.0858427	0.00447066		-0.317497	0	4.97108	0.201164	0.0845135	5.54616e-05	0.00045683	0.0847419	0.5741		-0.347056	0.232855	4.80067	0.208304	0.100366	1.34942e-05	0.000481066	0.100606	0.132645		-0.317497	0.0176435	4.96797	0.20129
																0.0570368	0.35903	4.77545	0.209404	0.0860714	4.32486e-07	0.00045746	0.0863001	0.00447062		-0.31704	0	4.96971	0.201219	0.0849703	5.54616e-05	0.00045683	0.0851987	0.5741		-0.346905	0.233312	4.80036	0.208318	0.100847	1.34837e-05	0.000480682	0.101087	0.132648		-0.31704	0.0176982	4.96663	0.201344
																0.0574936	0.359054	4.77544	0.209405	0.0865289	4.32492e-07	0.000457471	0.0867576	0.00447058		-0.316583	0	4.96834	0.201275	0.0854271	4.95974e-05	0.00045683	0.0856556	0.513397		-0.346756	0.233769	4.80005	0.208331	0.101328	1.35096e-05	0.000480297	0.101568	0.133009		-0.316583	0.0177531	4.96528	0.201398
																0.0579504	0.359078	4.77543	0.209405	0.0869863	4.49276e-07	0.000457481	0.0872151	0.00464397		-0.316126	0	4.96711	0.201324	0.085884	4.95974e-05	0.00045683	0.0861124	0.513397		-0.346608	0.234226	4.79974	0.208345	0.101808	1.35053e-05	0.000479924	0.102048	0.13307		-0.316126	0.017808	4.96407	0.201448
																0.0584072	0.359102	4.77542	0.209406	0.0874438	4.51542e-07	0.00045749	0.0876726	0.0046673		-0.315669	0	4.96589	0.201374	0.0863408	4.95974e-05	0.00045683	0.0865692	0.513397		-0.346461	0.234683	4.79943	0.208358	0.102288	1.34946e-05	0.000479554	0.102528	0.133068		-0.315669	0.0178631	4.96285	0.201497
																0.0588641	0.359127	4.77541	0.209406	0.0879013	4.51554e-07	0.000457499	0.0881301	0.00466733		-0.315212	0	4.96467	0.201423	0.0867976	4.95974e-05	0.00045683	0.087026	0.513397		-0.346315	0.235139	4.79911	0.208372	0.102767	1.34838e-05	0.000479184	0.103007	0.133064		-0.315212	0.0179184	4.96163	0.201547
																0.0593209	0.359152	4.7754	0.209407	0.0883588	4.51564e-07	0.000457507	0.0885876	0.00466735		-0.314756	0	4.96345	0.201473	0.0872545	4.95974e-05	0.00045683	0.0874829	0.513397		-0.34617	0.235596	4.7988	0.208385	0.103247	1.28904e-05	0.000478814	0.103486	0.127306		-0.314756	0.0179738	4.96041	0.201596
																0.0597777	0.359177	4.77539	0.209407	0.0888163	4.51574e-07	0.000457515	0.0890451	0.00466738		-0.314299	0	4.96222	0.201523	0.0877113	4.95974e-05	0.00045683	0.0879397	0.513397		-0.346027	0.236053	4.79851	0.208398	0.103725	1.28121e-05	0.000478444	0.103965	0.12663		-0.314299	0.0180293	4.9592	0.201645
																0.0602346	0.359202	4.77538	0.209407	0.0892738	4.6858e-07	0.000457522	0.0895026	0.00484307		-0.313842	0	4.961	0.201572	0.0881681	4.95974e-05	0.00045683	0.0883965	0.513397		-0.345884	0.23651	4.79821	0.208411	0.104204	1.27844e-05	0.000478095	0.104443	0.126449		-0.313842	0.018085	4.958	0.201694
																0.0606914	0.359227	4.77537	0.209408	0.0897314	4.71515e-07	0.000457536	0.0899601	0.00487327		-0.313385	0	4.95978	0.201622	0.0886249	4.95974e-05	0.00045683	0.0888534	0.513397		-0.345743	0.236967	4.79792	0.208424	0.104682	1.27753e-05	0.000477754	0.104921	0.126449		-0.313385	0.0181408	4.95681	0.201743
																0.0611482	0.359252	4.77536	0.209408	0.0901889	4.71533e-07	0.000457549	0.0904177	0.0048733		-0.312928	0	4.95856	0.201671	0.0890818	4.95974e-05	0.00045683	0.0893102	0.513397		-0.345604	0.237424	4.79762	0.208437	0.10516	1.27662e-05	0.000477414	0.105398	0.126449		-0.312928	0.0181967	4.95561	0.201792
																0.0616051	0.359278	4.77535	0.209409	0.0906464	4.71549e-07	0.000457562	0.0908752	0.00487333		-0.312471	0	4.95734	0.201721	0.0895386	4.95974e-05	0.00045683	0.089767	0.513397		-0.345465	0.23788	4.79733	0.208449	0.105637	1.2757e-05	0.000477074	0.105876	0.126448		-0.312471	0.0182528	4.95441	0.20184
																0.0620619	0.359304	4.77534	0.209409	0.091104	4.71564e-07	0.000457574	0.0913328	0.00487335		-0.312015	0	4.95613	0.20177	0.0899954	4.95974e-05	0.00045683	0.0902238	0.513397		-0.345327	0.238337	4.79704	0.208462	0.106114	1.27478e-05	0.000476734	0.106353	0.126447		-0.312015	0.018309	4.95322	0.201889
																0.0625187	0.35933	4.77532	0.20941	0.0915616	4.81076e-07	0.000457586	0.0917904	0.00497154		-0.311558	0	4.95491	0.20182	0.0904523	4.45663e-05	0.00045683	0.0906807	0.461319		-0.345191	0.238794	4.79674	0.208475	0.106591	1.27385e-05	0.000476395	0.106829	0.126444		-0.311558	0.0183654	4.95202	0.201938
																0.0629755	0.359356	4.77531	0.20941	0.0920192	4.92348e-07	0.000457597	0.092248	0.0050879		-0.311101	0	4.95381	0.201865	0.0909091	4.45663e-05	0.00045683	0.0911375	0.461319		-0.345056	0.239251	4.79645	0.208488	0.107067	1.24365e-05	0.000476056	0.107305	0.123534		-0.311101	0.0184219	4.95093	0.201982
																0.0634324	0.359383	4.7753	0.209411	0.0924768	4.92368e-07	0.000457607	0.0927056	0.005088		-0.310644	0	4.95272	0.201909	0.0913659	4.45663e-05	0.00045683	0.0915943	0.461319		-0.344922	0.239708	4.79616	0.2085	0.107543	1.21691e-05	0.000475718	0.107781	0.120965		-0.310644	0.0184785	4.94984	0.202027
																0.0638892	0.359409	4.77529	0.209411	0.0929344	4.92387e-07	0.000457616	0.0931632	0.00508808		-0.310187	0	4.95163	0.201954	0.0918228	4.45663e-05	0.00045683	0.0920512	0.461319		-0.344789	0.240165	4.79588	0.208512	0.108019	1.21608e-05	0.00047538	0.108257	0.120967		-0.310187	0.0185353	4.94875	0.202071
																0.064346	0.359436	4.77528	0.209412	0.093392	4.92404e-07	0.000457625	0.0936208	0.00508816		-0.30973	0	4.95054	0.201998	0.0922796	4.45663e-05	0.00045683	0.092508	0.461319		-0.344658	0.240621	4.7956	0.208524	0.108495	1.21523e-05	0.000475043	0.108732	0.120969		-0.30973	0.0185923	4.94767	0.202115
																0.0648029	0.359463	4.77527	0.209412	0.0938496	4.9242e-07	0.000457634	0.0940784	0.00508823		-0.309274	0	4.94944	0.202043	0.0927364	4.45663e-05	0.00045683	0.0929648	0.461319		-0.344528	0.241078	4.79532	0.208536	0.10897	1.20881e-05	0.000474707	0.109207	0.120415		-0.309274	0.0186494	4.9466	0.202159
																0.0652597	0.35949	4.77526	0.209413	0.0943072	5.08192e-07	0.000457642	0.0945361	0.00525111		-0.308817	0	4.94835	0.202087	0.0931932	4.45663e-05	0.00045683	0.0934217	0.461319		-0.344398	0.241535	4.79505	0.208549	0.109444	1.20584e-05	0.00047439	0.109681	0.1202		-0.308817	0.0187066	4.94552	0.202203
																0.0657165	0.359517	4.77525	0.209413	0.0947649	5.10924e-07	0.000457656	0.0949937	0.00527917		-0.30836	0	4.94726	0.202132	0.0936501	4.45663e-05	0.00045683	0.0938785	0.461319		-0.344271	0.241992	4.79477	0.208561	0.109919	1.20505e-05	0.00047408	0.110156	0.120199		-0.30836	0.018764	4.94445	0.202247
																0.0661733	0.359545	4.77523	0.209414	0.0952225	5.10951e-07	0.00045767	0.0954514	0.00527929		-0.307903	0	4.94617	0.202177	0.0941069	4.45663e-05	0.00045683	0.0943353	0.461319		-0.344144	0.242449	4.79449	0.208573	0.110393	1.20425e-05	0.00047377	0.11063	0.120198		-0.307903	0.0188216	4.94338	0.202291
																0.0666302	0.359573	4.77522	0.209414	0.0956802	5.10976e-07	0.000457684	0.0959091	0.00527939		-0.307446	0	4.94508	0.202221	0.0945637	4.45663e-05	0.00045683	0.0947921	0.461319		-0.344018	0.242906	4.79422	0.208585	0.110867	1.20344e-05	0.000473461	0.111103	0.120196		-0.307446	0.0188793	4.94231	0.202335
																0.067087	0.359601	4.77521	0.209415	0.0961379	5.12714e-07	0.000457697	0.0963668	0.0052972		-0.306989	0	4.94399	0.202266	0.0950206	4.45663e-05	0.00045683	0.095249	0.461319		-0.343894	0.243362	4.79394	0.208597	0.11134	1.15482e-05	0.000473153	0.111577	0.115415		-0.306989	0.0189371	4.94124	0.202379
																0.0675438	0.359629	4.7752	0.209415	0.0965956	5.33506e-07	0.000457709	0.0968245	0.00551186		-0.306533	0	4.9429	0.20231	0.0954774	4.0219e-05	0.00045683	0.0957058	0.416319		-0.343771	0.243819	4.79367	0.208608	0.111813	1.15159e-05	0.000472846	0.11205	0.115166		-0.306533	0.0189951	4.94016	0.202422
																0.0680007	0.359657	4.77519	0.209416	0.0970533	5.33535e-07	0.000457721	0.0972822	0.00551203		-0.306076	0	4.94192	0.202351	0.0959342	4.0219e-05	0.00045683	0.0961626	0.416319		-0.343649	0.244276	4.79341	0.20862	0.112286	1.15087e-05	0.00047254	0.112522	0.115169		-0.306076	0.0190532	4.93918	0.202463
																0.0684575	0.359686	4.77518	0.209416	0.097511	5.33563e-07	0.000457732	0.0977399	0.00551219		-0.305619	0	4.94094	0.202391	0.096391	4.0219e-05	0.00045683	0.0966195	0.416319		-0.343528	0.244733	4.79314	0.208631	0.112759	1.15015e-05	0.000472234	0.112995	0.115172		-0.305619	0.0191115	4.9382	0.202503
																0.0689143	0.359714	4.77516	0.209417	0.0979688	5.3359e-07	0.000457743	0.0981976	0.00551233		-0.305162	0	4.93996	0.202431	0.0968479	4.0219e-05	0.00045683	0.0970763	0.416319		-0.343408	0.24519	4.79288	0.208643	0.113231	1.14942e-05	0.000471929	0.113467	0.115173		-0.305162	0.01917	4.93723	0.202543
																0.0693712	0.359743	4.77515	0.209417	0.0984265	5.33615e-07	0.000457752	0.0986554	0.00551247		-0.304705	0	4.93897	0.202471	0.0973047	4.0219e-05	0.00045683	0.0975331	0.416319		-0.34329	0.245647	4.79262	0.208654	0.113703	1.14869e-05	0.000471626	0.113938	0.115174		-0.304705	0.0192286	4.93627	0.202582
																0.069828	0.359772	4.77514	0.209418	0.0988843	5.33638e-07	0.000457762	0.0991131	0.0055126		-0.304249	0	4.93799	0.202511	0.0977615	4.0219e-05	0.00045683	0.0979899	0.416319		-0.343173	0.246103	4.79235	0.208666	0.114174	1.14168e-05	0.000471323	0.11441	0.114545		-0.304249	0.0192873	4.9353	0.202622
																0.0702848	0.359802	4.77513	0.209419	0.099342	5.48183e-07	0.000457771	0.0995709	0.00566274		-0.303792	0	4.93701	0.202552	0.0982184	4.0219e-05	0.00045683	0.0984468	0.416319		-0.343057	0.24656	4.79209	0.208677	0.114646	1.13855e-05	0.000471037	0.114881	0.1143		-0.303792	0.0193462	4.93434	0.202662
																0.0707416	0.359831	4.77511	0.209419	0.0997998	5.50713e-07	0.000457785	0.100029	0.0056887		-0.303335	0	4.93603	0.202592	0.0986752	4.0219e-05	0.00045683	0.0989036	0.416319		-0.342942	0.247017	4.79183	0.208689	0.115117	1.12792e-05	0.000470758	0.115352	0.1133		-0.303335	0.0194053	4.93337	0.202701
																0.0711985	0.359861	4.7751	0.20942	0.100258	5.50751e-07	0.000457801	0.100486	0.00568889		-0.302878	0	4.93505	0.202632	0.099132	4.0219e-05	0.00045683	0.0993604	0.416319		-0.342828	0.247474	4.79157	0.2087	0.115587	1.09122e-05	0.00047048	0.115823	0.109679		-0.302878	0.0194645	4.9324	0.202741
																0.0716553	0.35989	4.77509	0.20942	0.100715	5.50786e-07	0.000457815	0.100944	0.00568908		-0.302421	0	4.93407	0.202672	0.0995889	4.0219e-05	0.00045683	0.0998173	0.416319		-0.342716	0.247931	4.79132	0.208711	0.116058	1.09062e-05	0.000470203	0.116293	0.109682		-0.302421	0.0195239	4.93144	0.202781
																0.0721121	0.35992	4.77508	0.209421	0.101173	5.68654e-07	0.000457829	0.101402	0.00587346		-0.301964	0	4.93309	0.202713	0.100046	4.0219e-05	0.00045683	0.100274	0.416319		-0.342604	0.248388	4.79107	0.208722	0.116528	1.09001e-05	0.000469926	0.116763	0.109685		-0.301964	0.0195834	4.93048	0.20282
																0.072569	0.359951	4.77506	0.209421	0.101631	5.75075e-07	0.000457842	0.10186	0.00593961		-0.301508	0	4.93212	0.202753	0.100503	3.64384e-05	0.00045683	0.100731	0.377185		-0.342494	0.248844	4.79082	0.208733	0.116998	1.08939e-05	0.000469651	0.117233	0.109688		-0.301508	0.0196431	4.92951	0.20286
																0.0730258	0.359981	4.77505	0.209422	0.102089	5.75114e-07	0.000457854	0.102318	0.00593985		-0.301051	0	4.93123	0.202789	0.100959	3.64384e-05	0.00045683	0.101188	0.377185		-0.342385	0.249301	4.79057	0.208743	0.117468	1.08878e-05	0.000469377	0.117702	0.10969		-0.301051	0.019703	4.92863	0.202896
																0.0734826	0.360012	4.77504	0.209422	0.102547	5.75151e-07	0.000457866	0.102776	0.00594008		-0.300594	0	4.93034	0.202826	0.101416	3.64384e-05	0.00045683	0.101645	0.377185		-0.342277	0.249758	4.79032	0.208754	0.117937	1.08815e-05	0.000469104	0.118172	0.109691		-0.300594	0.019763	4.92775	0.202932
																0.0739394	0.360042	4.77502	0.209423	0.103005	5.75186e-07	0.000457878	0.103234	0.00594029		-0.300137	0	4.92946	0.202862	0.101873	3.64384e-05	0.00045683	0.102101	0.377185		-0.342171	0.250215	4.79007	0.208765	0.118406	1.08753e-05	0.000468833	0.118641	0.109691		-0.300137	0.0198231	4.92688	0.202968
																0.0743963	0.360073	4.77501	0.209424	0.103462	5.75219e-07	0.000457888	0.103691	0.0059405		-0.29968	0	4.92857	0.202898	0.10233	3.64384e-05	0.00045683	0.102558	0.377185		-0.342065	0.250672	4.78982	0.208776	0.118875	1.0869e-05	0.000468562	0.119109	0.109691		-0.29968	0.0198835	4.92601	0.203004
																0.0748531	0.360105	4.775	0.209424	0.10392	5.7525e-07	0.000457898	0.104149	0.00594069		-0.299223	0	4.92769	0.202935	0.102787	3.64384e-05	0.00045683	0.103015	0.377185		-0.341961	0.251128	4.78957	0.208787	0.119344	1.06593e-05	0.000468293	0.119578	0.107637		-0.299223	0.019944	4.92513	0.20304
																0.0753099	0.360136	4.77498	0.209425	0.104378	5.88576e-07	0.000457908	0.104607	0.00607818		-0.298767	0	4.9268	0.202971	0.103243	3.64384e-05	0.00045683	0.103472	0.377185		-0.341858	0.251585	4.78933	0.208798	0.119812	1.0342e-05	0.000468039	0.120046	0.104489		-0.298767	0.0200047	4.92426	0.203076
																0.0757668	0.360167	4.77497	0.209425	0.104836	5.90906e-07	0.000457924	0.105065	0.00610203		-0.29831	0	4.92592	0.203008	0.1037	3.64384e-05	0.00045683	0.103929	0.377185		-0.341756	0.252042	4.78909	0.208808	0.12028	1.03499e-05	0.000467791	0.120514	0.104624		-0.29831	0.0200655	4.92339	0.203112
																0.0762236	0.360199	4.77496	0.209426	0.105294	5.90955e-07	0.00045794	0.105523	0.00610232		-0.297853	0	4.92503	0.203044	0.104157	3.64384e-05	0.00045683	0.104386	0.377185		-0.341656	0.252499	4.78885	0.208818	0.120748	1.03563e-05	0.000467547	0.120981	0.104744		-0.297853	0.0201265	4.92251	0.203148
																0.0766804	0.360231	4.77494	0.209427	0.105752	6.02365e-07	0.000457955	0.105981	0.00621993		-0.297396	0	4.92415	0.203081	0.104614	3.64384e-05	0.00045683	0.104842	0.377185		-0.341556	0.252956	4.78861	0.208829	0.121215	1.0351e-05	0.000467307	0.121449	0.104744		-0.297396	0.0201876	4.92163	0.203185
																0.0771373	0.360263	4.77493	0.209427	0.10621	6.17006e-07	0.00045797	0.106439	0.00637091		-0.296939	0	4.92327	0.203117	0.105071	3.64384e-05	0.00045683	0.105299	0.377185		-0.341458	0.253413	4.78838	0.208839	0.121683	1.03456e-05	0.000467067	0.121916	0.104743		-0.296939	0.020249	4.92076	0.203221
																0.0775941	0.360295	4.77492	0.209428	0.106668	6.17057e-07	0.000457983	0.106897	0.00637125		-0.296482	0	4.92238	0.203154	0.105528	3.31313e-05	0.00045683	0.105756	0.342952		-0.34136	0.253869	4.78814	0.208849	0.12215	1.03402e-05	0.000466829	0.122383	0.104742		-0.296482	0.0203104	4.91989	0.203257
																0.0780509	0.360328	4.7749	0.209428	0.107126	6.17106e-07	0.000457997	0.107355	0.00637157		-0.296026	0	4.92158	0.203187	0.105984	3.31313e-05	0.00045683	0.106213	0.342952		-0.341264	0.254326	4.7879	0.20886	0.122616	1.03347e-05	0.000466593	0.12285	0.10474		-0.296026	0.0203721	4.91909	0.20329
																0.0785077	0.36036	4.77489	0.209429	0.107584	6.17152e-07	0.000458009	0.107813	0.00637187		-0.295569	0	4.92078	0.20322	0.106441	3.31313e-05	0.00045683	0.10667	0.342952		-0.341169	0.254783	4.78767	0.20887	0.123083	1.03293e-05	0.000466357	0.123316	0.104737		-0.295569	0.0204339	4.91829	0.203323
																0.0789646	0.360393	4.77487	0.20943	0.108042	6.17196e-07	0.000458021	0.108271	0.00637216		-0.295112	0	4.91998	0.203253	0.106898	3.31313e-05	0.00045683	0.107127	0.342952		-0.341076	0.25524	4.78743	0.20888	0.123549	1.02227e-05	0.000466123	0.123782	0.103708		-0.295112	0.0204959	4.91749	0.203356
																0.0794214	0.360426	4.77486	0.20943	0.1085	6.17238e-07	0.000458033	0.108729	0.00637243		-0.294655	0	4.91918	0.203286	0.107355	3.31313e-05	0.00045683	0.107583	0.342952		-0.340983	0.255697	4.78719	0.208891	0.124015	9.92492e-06	0.00046589	0.124248	0.100738		-0.294655	0.020558	4.9167	0.203389
																0.0798782	0.360459	4.77485	0.209431	0.108958	6.17277e-07	0.000458044	0.109187	0.00637269		-0.294198	0	4.91837	0.203319	0.107812	3.31313e-05	0.00045683	0.10804	0.342952		-0.340892	0.256154	4.78697	0.208901	0.124481	9.85265e-06	0.000465658	0.124714	0.100054		-0.294198	0.0206203	4.9159	0.203422
																0.0803351	0.360493	4.77483	0.209431	0.109416	6.29392e-07	0.000458054	0.109645	0.0064976		-0.293741	0	4.91757	0.203352	0.108269	3.31313e-05	0.00045683	0.108497	0.342952		-0.340801	0.25661	4.78674	0.20891	0.124947	9.8219e-06	0.000465439	0.12518	0.0997888		-0.293741	0.0206828	4.9151	0.203455
																0.0807919	0.360526	4.77482	0.209432	0.109874	6.31524e-07	0.000458071	0.110103	0.00651938		-0.293285	0	4.91677	0.203385	0.108725	3.31313e-05	0.00045683	0.108954	0.342952		-0.340712	0.257067	4.78652	0.20892	0.125412	9.81744e-06	0.000465226	0.125645	0.0997891		-0.293285	0.0207454	4.91431	0.203488
																0.0812487	0.36056	4.7748	0.209433	0.110332	6.3656e-07	0.000458087	0.110561	0.00657113		-0.292828	0	4.91597	0.203419	0.109182	3.31313e-05	0.00045683	0.109411	0.342952		-0.340624	0.257524	4.78629	0.20893	0.125878	9.81296e-06	0.000465015	0.12611	0.0997889		-0.292828	0.0208083	4.91351	0.203521
																0.0817056	0.360594	4.77479	0.209433	0.11079	6.59344e-07	0.000458103	0.111019	0.00680609		-0.292371	0	4.91517	0.203452	0.109639	3.31313e-05	0.00045683	0.109868	0.342952		-0.340537	0.257981	4.78607	0.20894	0.126343	9.80844e-06	0.000464805	0.126575	0.0997881		-0.292371	0.0208713	4.91271	0.203554
																0.0821624	0.360628	4.77477	0.209434	0.111248	6.5941e-07	0.000458119	0.111477	0.00680654		-0.291914	0	4.91437	0.203485	0.110096	3.31313e-05	0.00045683	0.110324	0.342952		-0.340452	0.258438	4.78584	0.20895	0.126808	9.8039e-06	0.000464596	0.12704	0.0997868		-0.291914	0.0209344	4.91193	0.203586
																0.0826192	0.360662	4.77476	0.209435	0.111706	6.59472e-07	0.000458133	0.111936	0.00680696		-0.291457	0	4.91357	0.203518	0.110553	3.02227e-05	0.00045683	0.110781	0.312844		-0.340367	0.258895	4.78562	0.208959	0.127272	9.79933e-06	0.000464388	0.127504	0.0997848		-0.291457	0.0209977	4.91114	0.203619
																0.083076	0.360697	4.77474	0.209435	0.112165	6.59531e-07	0.000458147	0.112394	0.00680737		-0.291	0	4.91284	0.203548	0.11101	3.02227e-05	0.00045683	0.111238	0.312844		-0.340284	0.259351	4.78539	0.208969	0.127737	9.78873e-06	0.000464182	0.127969	0.0997211		-0.291	0.0210612	4.91042	0.203649
																0.0835329	0.360731	4.77473	0.209436	0.112623	6.59587e-07	0.000458161	0.112852	0.00680775		-0.290544	0	4.91211	0.203578	0.111466	3.02227e-05	0.00045683	0.111695	0.312844		-0.340201	0.259808	4.78517	0.208979	0.128201	9.4303e-06	0.000463977	0.128433	0.0961121		-0.290544	0.0211249	4.90969	0.203679
																0.0839897	0.360766	4.77471	0.209437	0.113081	6.59641e-07	0.000458174	0.11331	0.00680811		-0.290087	0	4.91138	0.203609	0.111923	3.02227e-05	0.00045683	0.112152	0.312844		-0.34012	0.260265	4.78495	0.208988	0.128665	9.42642e-06	0.000463774	0.128897	0.0961146		-0.290087	0.0211888	4.90896	0.203709
																0.0844465	0.360801	4.7747	0.209437	0.113539	6.59692e-07	0.000458186	0.113768	0.00680845		-0.28963	0	4.91065	0.203639	0.11238	3.02227e-05	0.00045683	0.112608	0.312844		-0.34004	0.260722	4.78474	0.208998	0.129128	9.42252e-06	0.000463573	0.12936	0.0961166		-0.28963	0.0212528	4.90824	0.203739
																0.0849034	0.360837	4.77468	0.209438	0.113997	6.59741e-07	0.000458198	0.114226	0.00680878		-0.289173	0	4.90992	0.203669	0.112837	3.02227e-05	0.00045683	0.113065	0.312844		-0.339961	0.261179	4.78452	0.209007	0.129592	9.34659e-06	0.000463373	0.129824	0.0953832		-0.289173	0.021317	4.90751	0.203769
																0.0853602	0.360872	4.77467	0.209439	0.114455	6.7065e-07	0.000458209	0.114685	0.0069212		-0.288716	0	4.9092	0.203699	0.113294	3.02227e-05	0.00045683	0.113522	0.312844		-0.339884	0.261636	4.78431	0.209017	0.130055	9.31487e-06	0.000463184	0.130287	0.0950982		-0.288716	0.0213814	4.90679	0.203799
																0.085817	0.360908	4.77465	0.209439	0.114914	6.72585e-07	0.000458226	0.115143	0.00694091		-0.288259	0	4.90847	0.20373	0.113751	3.02227e-05	0.00045683	0.113979	0.312844		-0.339807	0.262092	4.78409	0.209026	0.130519	9.31117e-06	0.000463001	0.13075	0.095098		-0.288259	0.021446	4.90606	0.203829
																0.0862738	0.360943	4.77464	0.20944	0.115372	7.0097e-07	0.000458244	0.115601	0.00723356		-0.287803	0	4.90774	0.20376	0.114207	3.02227e-05	0.00045683	0.114436	0.312844		-0.339732	0.262549	4.78388	0.209035	0.130982	9.30744e-06	0.000462819	0.131213	0.0950972		-0.287803	0.0215107	4.90534	0.20386
																0.0867307	0.360979	4.77462	0.209441	0.11583	7.02187e-07	0.00045826	0.116059	0.00724586		-0.287346	0	4.90701	0.20379	0.114664	3.02227e-05	0.00045683	0.114893	0.312844		-0.339658	0.263006	4.78367	0.209045	0.131444	9.30368e-06	0.000462639	0.131676	0.0950959		-0.287346	0.0215757	4.90462	0.203889
																0.0871875	0.361015	4.77461	0.209441	0.116288	7.02264e-07	0.000458276	0.116518	0.0072464		-0.286889	0	4.90628	0.20382	0.115121	3.02227e-05	0.00045683	0.115349	0.312844		-0.339585	0.263463	4.78345	0.209054	0.131907	9.2999e-06	0.00046246	0.132138	0.095094		-0.286889	0.0216408	4.90391	0.203919
																0.0876443	0.361052	4.77459	0.209442	0.116747	7.02337e-07	0.000458292	0.116976	0.00724691		-0.286432	0	4.90556	0.20385	0.115578	2.76521e-05	0.00045683	0.115806	0.286235		-0.339513	0.26392	4.78324	0.209063	0.132369	9.10173e-06	0.000462283	0.132601	0.0931032		-0.286432	0.021706	4.9032	0.203949
																0.0881012	0.361088	4.77457	0.209443	0.117205	7.02407e-07	0.000458307	0.117434	0.0072474		-0.285975	0	4.90489	0.203878	0.116035	2.76521e-05	0.00045683	0.116263	0.286235		-0.339442	0.264377	4.78303	0.209072	0.132832	8.96371e-06	0.000462108	0.133063	0.0917262		-0.285975	0.0217715	4.90253	0.203976
																0.088558	0.361125	4.77456	0.209443	0.117663	7.02474e-07	0.000458321	0.117892	0.00724786		-0.285519	0	4.90423	0.203906	0.116492	2.76521e-05	0.00045683	0.11672	0.286235		-0.339372	0.264833	4.78283	0.209081	0.133294	8.96058e-06	0.000461934	0.133525	0.0917286		-0.285519	0.0218372	4.90187	0.204004
																0.0890148	0.361162	4.77454	0.209444	0.118122	7.02538e-07	0.000458334	0.118351	0.00724831		-0.285062	0	4.90356	0.203933	0.116948	2.76521e-05	0.00045683	0.117177	0.286235		-0.339304	0.26529	4.78262	0.20909	0.133756	8.95743e-06	0.000461763	0.133987	0.0917305		-0.285062	0.021903	4.90121	0.204031
																0.0894717	0.361199	4.77453	0.209445	0.11858	7.02599e-07	0.000458348	0.118809	0.00724873		-0.284605	0	4.9029	0.203961	0.117405	2.76521e-05	0.00045683	0.117634	0.286235		-0.339237	0.265747	4.78242	0.209099	0.134218	8.95427e-06	0.000461593	0.134448	0.0917319		-0.284605	0.021969	4.90054	0.204059
																0.0899285	0.361237	4.77451	0.209446	0.119038	7.02657e-07	0.00045836	0.119267	0.00724913		-0.284148	0	4.90223	0.203989	0.117862	2.76521e-05	0.00045683	0.11809	0.286235		-0.33917	0.266204	4.78221	0.209108	0.134679	8.87534e-06	0.000461424	0.13491	0.0909564		-0.284148	0.0220352	4.89988	0.204087
																0.0903853	0.361274	4.77449	0.209446	0.119497	7.12367e-07	0.000458372	0.119726	0.00734911		-0.283691	0	4.90157	0.204016	0.118319	2.76521e-05	0.00045683	0.118547	0.286235		-0.339105	0.266661	4.78201	0.209117	0.135141	8.84287e-06	0.000461266	0.135371	0.0906548		-0.283691	0.0221017	4.89922	0.204114
																0.0908421	0.361312	4.77448	0.209447	0.119955	7.38517e-07	0.00045839	0.120184	0.00761859		-0.283234	0	4.9009	0.204044	0.118776	2.76521e-05	0.00045683	0.119004	0.286235		-0.339042	0.267118	4.78181	0.209126	0.135602	8.83986e-06	0.000461113	0.135832	0.0906541		-0.283234	0.0221682	4.89856	0.204142
																0.091299	0.361349	4.77446	0.209448	0.120413	7.45404e-07	0.000458408	0.120643	0.00768933		-0.282778	0	4.90024	0.204072	0.119233	2.76521e-05	0.00045683	0.119461	0.286235		-0.338979	0.267574	4.78161	0.209135	0.136063	8.83683e-06	0.000460961	0.136293	0.0906528		-0.282778	0.022235	4.89791	0.204169
[truncated: 29 more columns]

## Sheet: Conductance matrix
																				0.210778	0.210764	0.210741	0.210715	0.210686	0.210657	0.210627	0.210596	0.210564	0.210532	0.2105	0.210467	0.210434	0.210401	0.210368	0.210335	0.210301	0.210268	0.210235	0.210202	0.210169	0.210136	0.210104	0.210071	0.210039	0.210008	0.209976	0.209945	0.209914	0.209884
																				0.210749	0.210746	0.21073	0.210709	0.210686	0.210661	0.210634	0.210606	0.210578	0.210549	0.210519	0.21049	0.210459	0.210429	0.210398	0.210368	0.210337	0.210306	0.210275	0.210245	0.210214	0.210184	0.210153	0.210123	0.210094	0.210064	0.210035	0.210006	0.209977	0.209949
																				0.210711	0.210715	0.210705	0.210688	0.210668	0.210646	0.210622	0.210597	0.21057	0.210544	0.210516	0.210488	0.21046	0.210431	0.210402	0.210373	0.210344	0.210315	0.210286	0.210257	0.210228	0.210199	0.21017	0.210141	0.210113	0.210085	0.210057	0.210029	0.210002	0.209975
																				0.210669	0.210679	0.210672	0.210659	0.210642	0.210622	0.210601	0.210578	0.210554	0.210529	0.210503	0.210476	0.21045	0.210422	0.210395	0.210367	0.210339	0.210312	0.210284	0.210256	0.210228	0.2102	0.210173	0.210145	0.210118	0.210091	0.210064	0.210038	0.210012	0.209986
																				0.210622	0.210638	0.210636	0.210625	0.210611	0.210594	0.210574	0.210553	0.210531	0.210507	0.210483	0.210458	0.210433	0.210407	0.21038	0.210354	0.210327	0.210301	0.210274	0.210247	0.21022	0.210194	0.210167	0.210141	0.210115	0.210089	0.210063	0.210037	0.210012	0.209987
																				0.210573	0.210594	0.210595	0.210588	0.210576	0.21056	0.210543	0.210524	0.210503	0.210481	0.210458	0.210435	0.21041	0.210386	0.210361	0.210336	0.21031	0.210284	0.210259	0.210233	0.210207	0.210182	0.210156	0.210131	0.210105	0.21008	0.210055	0.210031	0.210006	0.209982
																				0.21052	0.210546	0.21055	0.210546	0.210536	0.210523	0.210508	0.21049	0.210471	0.210451	0.210429	0.210407	0.210384	0.210361	0.210337	0.210313	0.210288	0.210264	0.210239	0.210214	0.210189	0.210165	0.21014	0.210116	0.210091	0.210067	0.210043	0.210019	0.209996	0.209973
																				0.210464	0.210495	0.210503	0.210501	0.210494	0.210483	0.210469	0.210453	0.210436	0.210417	0.210397	0.210376	0.210354	0.210332	0.210309	0.210286	0.210263	0.210239	0.210216	0.210192	0.210168	0.210144	0.21012	0.210097	0.210073	0.21005	0.210027	0.210004	0.209981	0.209959
																				0.210405	0.210441	0.210452	0.210453	0.210448	0.210439	0.210427	0.210413	0.210397	0.210379	0.210361	0.210341	0.210321	0.2103	0.210278	0.210256	0.210234	0.210211	0.210189	0.210166	0.210143	0.21012	0.210097	0.210074	0.210052	0.210029	0.210007	0.209985	0.209963	0.209941
																				0.210342	0.210384	0.210398	0.210402	0.210399	0.210392	0.210382	0.21037	0.210355	0.210339	0.210322	0.210304	0.210284	0.210265	0.210244	0.210223	0.210202	0.210181	0.210159	0.210137	0.210115	0.210093	0.210071	0.210049	0.210027	0.210006	0.209984	0.209963	0.209942	0.209921
																				0.210276	0.210323	0.210341	0.210347	0.210347	0.210342	0.210334	0.210323	0.21031	0.210296	0.21028	0.210263	0.210245	0.210226	0.210207	0.210187	0.210167	0.210147	0.210126	0.210105	0.210084	0.210063	0.210042	0.210021	0.21	0.209979	0.209959	0.209938	0.209918	0.209898
																				0.210207	0.210259	0.210281	0.21029	0.210292	0.210289	0.210283	0.210274	0.210262	0.210249	0.210235	0.210219	0.210203	0.210185	0.210167	0.210149	0.21013	0.21011	0.210091	0.210071	0.210051	0.210031	0.210011	0.209991	0.209971	0.209951	0.209931	0.209911	0.209892	0.209873
																				0.210134	0.210192	0.210217	0.210229	0.210233	0.210233	0.210228	0.210221	0.210211	0.2102	0.210187	0.210173	0.210157	0.210141	0.210125	0.210107	0.210089	0.210071	0.210052	0.210034	0.210015	0.209996	0.209977	0.209957	0.209938	0.209919	0.2099	0.209882	0.209863	0.209845
																				0.210058	0.210121	0.21015	0.210165	0.210172	0.210173	0.210171	0.210165	0.210157	0.210147	0.210136	0.210123	0.210109	0.210095	0.210079	0.210063	0.210046	0.210029	0.210012	0.209994	0.209976	0.209958	0.20994	0.209922	0.209904	0.209886	0.209868	0.20985	0.209832	0.209815
																				0.209977	0.210046	0.210079	0.210097	0.210106	0.21011	0.21011	0.210106	0.2101	0.210092	0.210082	0.210071	0.210058	0.210045	0.210031	0.210016	0.210001	0.209985	0.209968	0.209952	0.209935	0.209918	0.209901	0.209884	0.209867	0.20985	0.209833	0.209816	0.209799	0.209783
																				0.209892	0.209968	0.210004	0.210026	0.210038	0.210044	0.210046	0.210044	0.21004	0.210033	0.210025	0.210015	0.210005	0.209993	0.20998	0.209966	0.209952	0.209938	0.209923	0.209907	0.209892	0.209876	0.20986	0.209844	0.209828	0.209812	0.209796	0.20978	0.209764	0.209748
																				0.209803	0.209885	0.209926	0.20995	0.209965	0.209974	0.209978	0.209978	0.209976	0.209972	0.209965	0.209957	0.209948	0.209937	0.209926	0.209914	0.209901	0.209888	0.209874	0.20986	0.209846	0.209831	0.209816	0.209801	0.209786	0.209771	0.209756	0.209742	0.209727	0.209712
																				0.209709	0.209798	0.209844	0.209871	0.209889	0.209901	0.209907	0.20991	0.209909	0.209907	0.209902	0.209896	0.209888	0.209879	0.209869	0.209859	0.209847	0.209836	0.209823	0.20981	0.209797	0.209784	0.20977	0.209757	0.209743	0.209729	0.209715	0.209701	0.209688	0.209674
																				0.209611	0.209707	0.209757	0.209788	0.209809	0.209823	0.209832	0.209837	0.209839	0.209838	0.209835	0.209831	0.209825	0.209818	0.20981	0.209801	0.209791	0.20978	0.20977	0.209758	0.209746	0.209734	0.209722	0.20971	0.209697	0.209684	0.209672	0.209659	0.209646	0.209634
																				0.209507	0.209611	0.209665	0.209701	0.209725	0.209742	0.209753	0.209761	0.209765	0.209766	0.209766	0.209763	0.209759	0.209754	0.209747	0.20974	0.209732	0.209723	0.209713	0.209703	0.209693	0.209682	0.209671	0.20966	0.209649	0.209638	0.209626	0.209615	0.209603	0.209592
																				0.209398	0.20951	0.209569	0.209609	0.209637	0.209657	0.209671	0.209681	0.209687	0.209691	0.209692	0.209692	0.20969	0.209686	0.209682	0.209676	0.209669	0.209662	0.209654	0.209646	0.209637	0.209628	0.209618	0.209609	0.209599	0.209589	0.209578	0.209568	0.209558	0.209548
																				0.209283	0.209403	0.209468	0.209512	0.209544	0.209567	0.209584	0.209597	0.209606	0.209612	0.209615	0.209617	0.209617	0.209615	0.209613	0.209609	0.209604	0.209599	0.209593	0.209586	0.209579	0.209571	0.209563	0.209555	0.209546	0.209538	0.209529	0.20952	0.209511	0.209502
																				0.209162	0.209291	0.209362	0.209411	0.209446	0.209473	0.209493	0.209508	0.20952	0.209529	0.209535	0.209539	0.209541	0.209541	0.209541	0.209539	0.209536	0.209533	0.209528	0.209523	0.209518	0.209512	0.209505	0.209498	0.209491	0.209484	0.209477	0.209469	0.209462	0.209454
																				0.209034	0.209173	0.20925	0.209304	0.209343	0.209374	0.209397	0.209416	0.20943	0.209442	0.20945	0.209457	0.209461	0.209464	0.209465	0.209466	0.209465	0.209463	0.209461	0.209458	0.209454	0.20945	0.209445	0.20944	0.209434	0.209429	0.209423	0.209417	0.209411	0.209404
																				0.2089	0.209049	0.209133	0.209191	0.209235	0.209269	0.209297	0.209318	0.209336	0.20935	0.209362	0.209371	0.209378	0.209383	0.209387	0.209389	0.209391	0.209391	0.209391	0.209389	0.209388	0.209385	0.209382	0.209379	0.209375	0.209371	0.209367	0.209362	0.209358	0.209353
																				0.208758	0.208918	0.209009	0.209073	0.209122	0.20916	0.209191	0.209216	0.209237	0.209255	0.209269	0.209281	0.20929	0.209298	0.209305	0.209309	0.209313	0.209316	0.209317	0.209318	0.209318	0.209318	0.209317	0.209315	0.209313	0.209311	0.209309	0.209306	0.209303	0.209299
																				0.208608	0.20878	0.208878	0.208949	0.209002	0.209045	0.20908	0.209109	0.209134	0.209154	0.209172	0.209187	0.209199	0.20921	0.209219	0.209226	0.209232	0.209237	0.209241	0.209244	0.209247	0.209248	0.209249	0.20925	0.209249	0.209249	0.209248	0.209247	0.209246	0.209244
																				0.208451	0.208634	0.208741	0.208817	0.208877	0.208924	0.208964	0.208997	0.209025	0.209049	0.20907	0.209088	0.209104	0.209117	0.209129	0.209139	0.209148	0.209155	0.209162	0.209167	0.209172	0.209176	0.209179	0.209181	0.209183	0.209185	0.209186	0.209186	0.209187	0.209187
																				0.208284	0.208481	0.208596	0.20868	0.208745	0.208798	0.208842	0.208879	0.208911	0.208939	0.208964	0.208985	0.209004	0.209021	0.209036	0.209049	0.20906	0.20907	0.209079	0.209087	0.209094	0.2091	0.209106	0.20911	0.209114	0.209118	0.209121	0.209123	0.209126	0.209127
																				0.208108	0.208319	0.208443	0.208534	0.208606	0.208664	0.208713	0.208755	0.208792	0.208824	0.208852	0.208878	0.2089	0.20892	0.208938	0.208954	0.208969	0.208982	0.208993	0.209004	0.209014	0.209022	0.20903	0.209037	0.209043	0.209049	0.209054	0.209058	0.209063	0.209066
																				0.207922	0.208148	0.208282	0.208381	0.208459	0.208524	0.208578	0.208626	0.208667	0.208703	0.208736	0.208765	0.208791	0.208815	0.208836	0.208856	0.208873	0.208889	0.208904	0.208918	0.20893	0.208941	0.208951	0.208961	0.208969	0.208977	0.208985	0.208991	0.208998	0.209003
																				0.207725	0.207967	0.208112	0.20822	0.208305	0.208376	0.208437	0.208489	0.208536	0.208577	0.208614	0.208647	0.208678	0.208705	0.20873	0.208753	0.208774	0.208794	0.208811	0.208828	0.208843	0.208857	0.20887	0.208882	0.208893	0.208904	0.208913	0.208922	0.20893	0.208938
																				0.207517	0.207776	0.207933	0.208049	0.208143	0.208221	0.208288	0.208346	0.208398	0.208445	0.208486	0.208524	0.208559	0.208591	0.20862	0.208647	0.208671	0.208694	0.208715	0.208735	0.208753	0.20877	0.208786	0.208801	0.208815	0.208828	0.20884	0.208851	0.208861	0.208871
																				0.207296	0.207574	0.207743	0.20787	0.207972	0.208058	0.208131	0.208196	0.208254	0.208306	0.208353	0.208396	0.208435	0.208471	0.208505	0.208535	0.208564	0.208591	0.208615	0.208639	0.20866	0.20868	0.208699	0.208717	0.208733	0.208749	0.208764	0.208777	0.20879	0.208803
																				0.207062	0.20736	0.207543	0.20768	0.207792	0.207886	0.207967	0.208039	0.208103	0.208161	0.208213	0.208262	0.208306	0.208347	0.208385	0.20842	0.208453	0.208483	0.208512	0.208539	0.208564	0.208587	0.208609	0.20863	0.20865	0.208668	0.208686	0.208702	0.208717	0.208732
																				0.206814	0.207134	0.207331	0.20748	0.207601	0.207704	0.207794	0.207873	0.207944	0.208009	0.208067	0.208121	0.208171	0.208217	0.20826	0.2083	0.208337	0.208372	0.208405	0.208435	0.208464	0.208491	0.208517	0.208541	0.208563	0.208585	0.208605	0.208624	0.208642	0.20866
																				0.206551	0.206894	0.207107	0.207268	0.207401	0.207513	0.207612	0.207699	0.207778	0.207849	0.207915	0.207975	0.20803	0.208082	0.20813	0.208175	0.208217	0.208256	0.208293	0.208328	0.208361	0.208392	0.208421	0.208448	0.208474	0.208499	0.208522	0.208544	0.208565	0.208585
																				0.206271	0.206639	0.206869	0.207045	0.207189	0.207312	0.20742	0.207516	0.207603	0.207682	0.207755	0.207822	0.207884	0.207941	0.207995	0.208045	0.208092	0.208137	0.208178	0.208218	0.208254	0.208289	0.208322	0.208354	0.208383	0.208411	0.208437	0.208463	0.208486	0.208509
																				0.205973	0.206369	0.206617	0.206808	0.206965	0.2071	0.207219	0.207324	0.20742	0.207507	0.207587	0.207662	0.20773	0.207795	0.207854	0.20791	0.207963	0.208013	0.208059	0.208103	0.208145	0.208184	0.208221	0.208256	0.208289	0.20832	0.20835	0.208379	0.208406	0.208431
																				0.205656	0.206082	0.206351	0.206558	0.206729	0.206877	0.207006	0.207122	0.207228	0.207324	0.207413	0.207495	0.207571	0.207642	0.207708	0.207771	0.207829	0.207884	0.207936	0.207985	0.208031	0.208075	0.208116	0.208155	0.208192	0.208228	0.208261	0.208293	0.208323	0.208351
																				0.205319	0.205776	0.206067	0.206292	0.206479	0.206641	0.206783	0.20691	0.207026	0.207132	0.20723	0.20732	0.207404	0.207483	0.207556	0.207625	0.20769	0.207751	0.207808	0.207863	0.207914	0.207962	0.208008	0.208052	0.208093	0.208132	0.208169	0.208205	0.208238	0.20827
																				0.204959	0.205451	0.205766	0.206011	0.206215	0.206391	0.206547	0.206687	0.206814	0.206931	0.207038	0.207138	0.207231	0.207317	0.207398	0.207475	0.207546	0.207613	0.207677	0.207737	0.207793	0.207847	0.207898	0.207946	0.207991	0.208035	0.208076	0.208115	0.208152	0.208187
																				0.204574	0.205105	0.205447	0.205713	0.205936	0.206128	0.206299	0.206452	0.206592	0.20672	0.206838	0.206948	0.20705	0.207145	0.207234	0.207318	0.207397	0.207471	0.207541	0.207607	0.207669	0.207728	0.207784	0.207837	0.207887	0.207935	0.20798	0.208023	0.208063	0.208102
																				0.204163	0.204736	0.205107	0.205397	0.20564	0.20585	0.206037	0.206206	0.206359	0.206499	0.206629	0.206749	0.206862	0.206966	0.207064	0.207156	0.207243	0.207324	0.207401	0.207473	0.207542	0.207606	0.207667	0.207725	0.20778	0.207832	0.207882	0.207929	0.207973	0.208016
																				0.203723	0.204342	0.204745	0.205061	0.205326	0.205557	0.205761	0.205946	0.206114	0.206268	0.20641	0.206542	0.206665	0.20678	0.206888	0.206988	0.207083	0.207172	0.207256	0.207335	0.20741	0.207481	0.207548	0.207611	0.207671	0.207728	0.207782	0.207833	0.207882	0.207928
																				0.203252	0.203921	0.204359	0.204704	0.204994	0.205246	0.20547	0.205673	0.205857	0.206026	0.206182	0.206327	0.206461	0.206587	0.206704	0.206815	0.206918	0.207016	0.207107	0.207194	0.207275	0.207353	0.207425	0.207494	0.20756	0.207622	0.20768	0.207736	0.207789	0.207839
																				0.202746	0.203471	0.203947	0.204324	0.204641	0.204918	0.205163	0.205385	0.205587	0.205772	0.205943	0.206101	0.206249	0.206386	0.206515	0.206635	0.206748	0.206854	0.206954	0.207048	0.207137	0.207221	0.2073	0.207375	0.207446	0.207513	0.207577	0.207637	0.207694	0.207749
																				0.202202	0.202988	0.203508	0.20392	0.204268	0.20457	0.20484	0.205083	0.205304	0.205507	0.205694	0.205867	0.206028	0.206178	0.206318	0.206449	0.206572	0.206688	0.206797	0.206899	0.206995	0.207086	0.207172	0.207253	0.20733	0.207403	0.207471	0.207537	0.207598	0.207657
																				0.201617	0.202471	0.203039	0.20349	0.203871	0.204203	0.204498	0.204764	0.205006	0.205229	0.205433	0.205623	0.205798	0.205962	0.206115	0.206258	0.206391	0.206517	0.206635	0.206746	0.20685	0.206949	0.207042	0.207129	0.207212	0.20729	0.207364	0.207435	0.207501	0.207564
																				0.200986	0.201916	0.202537	0.203031	0.203449	0.203813	0.204137	0.204429	0.204695	0.204938	0.205161	0.205368	0.20556	0.205738	0.205905	0.20606	0.206205	0.206341	0.206469	0.206589	0.206702	0.206808	0.206908	0.207003	0.207092	0.207176	0.207256	0.207332	0.207403	0.20747
																				0.200305	0.201319	0.201999	0.202542	0.203001	0.203401	0.203757	0.204077	0.204368	0.204633	0.204878	0.205104	0.205313	0.205507	0.205687	0.205856	0.206013	0.206161	0.206299	0.206429	0.206551	0.206665	0.206773	0.206875	0.20697	0.207061	0.207146	0.207227	0.207304	0.207376
																				0.199568	0.200676	0.201423	0.20202	0.202524	0.202964	0.203355	0.203706	0.204025	0.204315	0.204583	0.204829	0.205056	0.205267	0.205463	0.205646	0.205817	0.205976	0.206125	0.206265	0.206396	0.206519	0.206635	0.206744	0.206847	0.206944	0.207036	0.207122	0.207204	0.207281
																				0.19877	0.199983	0.200805	0.201462	0.202017	0.202501	0.202931	0.203316	0.203665	0.203983	0.204275	0.204543	0.204791	0.20502	0.205233	0.20543	0.205615	0.205787	0.205947	0.206098	0.206239	0.206371	0.206496	0.206612	0.206723	0.206826	0.206924	0.207016	0.207103	0.207185
																				0.197902	0.199235	0.200141	0.200865	0.201478	0.202011	0.202483	0.202906	0.203289	0.203637	0.203955	0.204247	0.204516	0.204765	0.204995	0.205209	0.205408	0.205593	0.205766	0.205928	0.206079	0.206221	0.206354	0.206479	0.206597	0.206707	0.206811	0.206909	0.207002	0.207089
																				0.196959	0.198426	0.199426	0.200227	0.200904	0.201492	0.202011	0.202476	0.202895	0.203275	0.203622	0.20394	0.204232	0.204502	0.204751	0.204982	0.205196	0.205396	0.205582	0.205755	0.205917	0.206069	0.206211	0.206345	0.20647	0.206587	0.206698	0.206802	0.206901	0.206993
																				0.195929	0.197549	0.198658	0.199544	0.200293	0.200941	0.201513	0.202023	0.202482	0.202898	0.203276	0.203622	0.20394	0.204231	0.204501	0.20475	0.204981	0.205195	0.205394	0.20558	0.205754	0.205916	0.206067	0.206209	0.206342	0.206467	0.206585	0.206695	0.206799	0.206898
																				0.194804	0.196598	0.197829	0.198813	0.199642	0.200358	0.200988	0.201549	0.202052	0.202506	0.202918	0.203294	0.203638	0.203954	0.204245	0.204513	0.204761	0.204991	0.205204	0.205403	0.205588	0.205761	0.205922	0.206073	0.206214	0.206347	0.206471	0.206588	0.206698	0.206802
																				0.19357	0.195564	0.196935	0.198029	0.198948	0.199741	0.200436	0.201052	0.201603	0.202099	0.202548	0.202956	0.203329	0.20367	0.203983	0.204271	0.204538	0.204784	0.205012	0.205224	0.205421	0.205605	0.205776	0.205937	0.206086	0.206227	0.206358	0.206482	0.206598	0.206707
																				0.192214	0.194438	0.195969	0.197189	0.19821	0.199088	0.199854	0.200532	0.201135	0.201677	0.202165	0.202608	0.203011	0.203379	0.203716	0.204026	0.204311	0.204575	0.204818	0.205044	0.205254	0.205449	0.205631	0.2058	0.205959	0.206107	0.206246	0.206376	0.206498	0.206613
																				0.190719	0.19321	0.194925	0.196288	0.197425	0.198397	0.199244	0.199988	0.200649	0.20124	0.201771	0.202251	0.202686	0.203083	0.203445	0.203777	0.204083	0.204364	0.204623	0.204864	0.205086	0.205293	0.205485	0.205665	0.205832	0.205988	0.206134	0.206271	0.206399	0.20652
																				0.189065	0.191866	0.193795	0.195321	0.196589	0.197668	0.198603	0.199421	0.200145	0.200789	0.201366	0.201885	0.202355	0.202782	0.203171	0.203526	0.203852	0.204152	0.204428	0.204683	0.204919	0.205137	0.205341	0.20553	0.205706	0.20587	0.206024	0.206167	0.206302	0.206428
																				0.187227	0.190394	0.19257	0.194285	0.195701	0.196899	0.197932	0.198831	0.199623	0.200325	0.200951	0.201512	0.202019	0.202477	0.202894	0.203273	0.203621	0.203939	0.204232	0.204503	0.204752	0.204983	0.205197	0.205396	0.205581	0.205754	0.205915	0.206065	0.206206	0.206338
																				0.185175	0.188775	0.191242	0.193174	0.194758	0.196091	0.197231	0.19822	0.199085	0.199849	0.200527	0.201133	0.201678	0.20217	0.202615	0.20302	0.203389	0.203728	0.204038	0.204323	0.204587	0.20483	0.205055	0.205265	0.205459	0.20564	0.205808	0.205965	0.206113	0.20625
																				0.182872	0.186993	0.189802	0.191984	0.19376	0.195242	0.196502	0.197588	0.198533	0.199362	0.200096	0.20075	0.201334	0.20186	0.202336	0.202767	0.203159	0.203517	0.203845	0.204146	0.204424	0.20468	0.204916	0.205135	0.205339	0.205528	0.205704	0.205868	0.206021	0.206164
																				0.180273	0.185026	0.188241	0.190714	0.192706	0.194356	0.195747	0.196938	0.197968	0.198868	0.19966	0.200363	0.200989	0.201551	0.202057	0.202515	0.20293	0.203309	0.203655	0.203972	0.204264	0.204532	0.20478	0.205009	0.205221	0.205419	0.205602	0.205773	0.205932	0.206081
																				0.177332	0.182859	0.186556	0.189363	0.1916	0.193434	0.194969	0.196272	0.197394	0.198368	0.199222	0.199975	0.200645	0.201244	0.201781	0.202266	0.202705	0.203104	0.203468	0.203801	0.204107	0.204388	0.204647	0.204886	0.205108	0.205313	0.205504	0.205681	0.205847	0.206001
																				0.174008	0.180481	0.184745	0.187935	0.190445	0.192482	0.194171	0.195595	0.196813	0.197865	0.198783	0.199589	0.200303	0.200939	0.201509	0.202021	0.202484	0.202904	0.203286	0.203635	0.203955	0.204248	0.204518	0.204767	0.204998	0.205211	0.205409	0.205593	0.205764	0.205924
																				0.170285	0.177893	0.182813	0.186434	0.189246	0.191504	0.193359	0.194912	0.19623	0.197363	0.198347	0.199207	0.199967	0.200641	0.201243	0.201783	0.202269	0.20271	0.20311	0.203475	0.203808	0.204114	0.204395	0.204653	0.204892	0.205113	0.205318	0.205509	0.205686	0.205851
																				0.166137	0.175084	0.180759	0.184867	0.188012	0.190507	0.192539	0.194227	0.19565	0.196866	0.197917	0.198832	0.199637	0.20035	0.200984	0.201551	0.202061	0.202522	0.20294	0.20332	0.203667	0.203985	0.204276	0.204545	0.204792	0.20502	0.205232	0.205429	0.205611	0.205781
																				0.161286	0.171984	0.178573	0.183236	0.186748	0.1895	0.191719	0.193546	0.195077	0.196378	0.197496	0.198468	0.199318	0.200068	0.200734	0.201329	0.201862	0.202343	0.202778	0.203173	0.203534	0.203863	0.204164	0.204442	0.204697	0.204933	0.205151	0.205353	0.205541	0.205716
																				0.155234	0.168533	0.176253	0.181552	0.185468	0.188493	0.190906	0.192877	0.194518	0.195904	0.19709	0.198116	0.199012	0.199799	0.200497	0.201117	0.201673	0.202174	0.202625	0.203035	0.203408	0.203748	0.204059	0.204345	0.204608	0.204851	0.205075	0.205283	0.205476	0.205655
																				0.149014	0.16487	0.173828	0.179835	0.184187	0.1875	0.190112	0.192228	0.193978	0.195449	0.196702	0.197782	0.198721	0.199545	0.200272	0.200919	0.201496	0.202015	0.202482	0.202906	0.20329	0.203641	0.203962	0.204256	0.204526	0.204775	0.205005	0.205218	0.205415	0.205599
																				0.138632	0.16049	0.171273	0.178113	0.18293	0.186536	0.189348	0.191608	0.193465	0.195018	0.196336	0.197468	0.19845	0.199308	0.200064	0.200735	0.201332	0.201868	0.202351	0.202787	0.203183	0.203543	0.203873	0.204174	0.204451	0.204706	0.204941	0.205159	0.205361	0.205548
																				0.130061	0.156419	0.168845	0.17647	0.181732	0.18562	0.188626	0.191025	0.192985	0.194618	0.195998	0.197179	0.1982	0.199091	0.199874	0.200567	0.201183	0.201735	0.202232	0.20268	0.203086	0.203455	0.203792	0.204101	0.204384	0.204644	0.204884	0.205106	0.205311	0.205502
																				0.121878	0.152936	0.166618	0.174926	0.180606	0.184765	0.187956	0.190487	0.192546	0.194253	0.19569	0.196917	0.197975	0.198896	0.199703	0.200417	0.201051	0.201617	0.202126	0.202585	0.203	0.203377	0.203721	0.204036	0.204324	0.204589	0.204834	0.205059	0.205268	0.205462
																				0.0663665	0.146526	0.164027	0.173393	0.179548	0.183981	0.18735	0.190005	0.192154	0.193929	0.195419	0.196687	0.197778	0.198726	0.199555	0.200287	0.200936	0.201515	0.202035	0.202503	0.202926	0.20331	0.20366	0.20398	0.204273	0.204542	0.204791	0.205019	0.205231	0.205427
																				0.0584313	0.142377	0.161801	0.172012	0.178601	0.183288	0.186821	0.189588	0.191818	0.193653	0.19519	0.196493	0.197612	0.198583	0.199431	0.200178	0.20084	0.20143	0.201958	0.202434	0.202864	0.203254	0.20361	0.203934	0.204231	0.204504	0.204755	0.204986	0.205201	0.205399
																				0.0555071	0.139477	0.160088	0.170894	0.177821	0.182717	0.186387	0.189249	0.191546	0.193431	0.195005	0.196338	0.19748	0.198469	0.199332	0.200092	0.200764	0.201362	0.201898	0.20238	0.202816	0.203211	0.20357	0.203898	0.204198	0.204473	0.204727	0.204961	0.205177	0.205377
																				0.0541017	0.137553	0.158892	0.170085	0.177246	0.182293	0.186064	0.188997	0.191345	0.193268	0.19487	0.196225	0.197384	0.198387	0.199261	0.200029	0.200709	0.201314	0.201855	0.202342	0.202781	0.203179	0.203541	0.203871	0.204174	0.204451	0.204707	0.204942	0.20516	0.205361
																				0.0534201	0.136452	0.158188	0.169598	0.176896	0.182033	0.185866	0.188843	0.191222	0.193168	0.194788	0.196156	0.197326	0.198336	0.199217	0.199991	0.200676	0.201284	0.201829	0.202318	0.20276	0.20316	0.203524	0.203856	0.204159	0.204438	0.204694	0.204931	0.205149	0.205351
																				0.0532134	0.136093	0.157955	0.169437	0.176778	0.181945	0.185799	0.18879	0.191181	0.193134	0.19476	0.196133	0.197306	0.19832	0.199203	0.199979	0.200664	0.201275	0.20182	0.20231	0.202753	0.203154	0.203518	0.20385	0.204155	0.204434	0.20469	0.204927	0.205146	0.205348
																				0.0534201	0.136452	0.158188	0.169598	0.176896	0.182033	0.185866	0.188843	0.191222	0.193168	0.194788	0.196156	0.197326	0.198336	0.199217	0.199991	0.200676	0.201284	0.201829	0.202318	0.20276	0.20316	0.203524	0.203856	0.204159	0.204438	0.204694	0.204931	0.205149	0.205351
																				0.0541017	0.137553	0.158892	0.170085	0.177246	0.182293	0.186064	0.188997	0.191345	0.193268	0.19487	0.196225	0.197384	0.198387	0.199261	0.200029	0.200709	0.201314	0.201855	0.202342	0.202781	0.203179	0.203541	0.203871	0.204174	0.204451	0.204707	0.204942	0.20516	0.205361
																				0.0555071	0.139477	0.160088	0.170894	0.177821	0.182717	0.186387	0.189249	0.191546	0.193431	0.195005	0.196338	0.19748	0.198469	0.199332	0.200092	0.200764	0.201362	0.201898	0.20238	0.202816	0.203211	0.20357	0.203898	0.204198	0.204473	0.204727	0.204961	0.205177	0.205377
																				0.0584313	0.142377	0.161801	0.172012	0.178601	0.183288	0.186821	0.189588	0.191818	0.193653	0.19519	0.196493	0.197612	0.198583	0.199431	0.200178	0.20084	0.20143	0.201958	0.202434	0.202864	0.203254	0.20361	0.203934	0.204231	0.204504	0.204755	0.204986	0.205201	0.205399
																				0.0663665	0.146526	0.164027	0.173393	0.179548	0.183981	0.18735	0.190005	0.192154	0.193929	0.195419	0.196687	0.197778	0.198726	0.199555	0.200287	0.200936	0.201515	0.202035	0.202503	0.202926	0.20331	0.20366	0.20398	0.204273	0.204542	0.204791	0.205019	0.205231	0.205427
																				0.121878	0.152936	0.166618	0.174926	0.180606	0.184765	0.187956	0.190487	0.192546	0.194253	0.19569	0.196917	0.197975	0.198896	0.199703	0.200417	0.201051	0.201617	0.202126	0.202585	0.203	0.203377	0.203721	0.204036	0.204324	0.204589	0.204834	0.205059	0.205268	0.205462
																				0.130061	0.156419	0.168845	0.17647	0.181732	0.18562	0.188626	0.191025	0.192985	0.194618	0.195998	0.197179	0.1982	0.199091	0.199874	0.200567	0.201183	0.201735	0.202232	0.20268	0.203086	0.203455	0.203792	0.204101	0.204384	0.204644	0.204884	0.205106	0.205311	0.205502
																				0.138632	0.16049	0.171273	0.178113	0.18293	0.186536	0.189348	0.191608	0.193465	0.195018	0.196336	0.197468	0.19845	0.199308	0.200064	0.200735	0.201332	0.201868	0.202351	0.202787	0.203183	0.203543	0.203873	0.204174	0.204451	0.204706	0.204941	0.205159	0.205361	0.205548
																				0.149014	0.16487	0.173828	0.179835	0.184187	0.1875	0.190112	0.192228	0.193978	0.195449	0.196702	0.197782	0.198721	0.199545	0.200272	0.200919	0.201496	0.202015	0.202482	0.202906	0.20329	0.203641	0.203962	0.204256	0.204526	0.204775	0.205005	0.205218	0.205415	0.205599
																				0.155234	0.168533	0.176253	0.181552	0.185468	0.188493	0.190906	0.192877	0.194518	0.195904	0.19709	0.198116	0.199012	0.199799	0.200497	0.201117	0.201673	0.202174	0.202625	0.203035	0.203408	0.203748	0.204059	0.204345	0.204608	0.204851	0.205075	0.205283	0.205476	0.205655
																				0.161286	0.171984	0.178573	0.183236	0.186748	0.1895	0.191719	0.193546	0.195077	0.196378	0.197496	0.198468	0.199318	0.200068	0.200734	0.201329	0.201862	0.202343	0.202778	0.203173	0.203534	0.203863	0.204164	0.204442	0.204697	0.204933	0.205151	0.205353	0.205541	0.205716
																				0.166137	0.175084	0.180759	0.184867	0.188012	0.190507	0.192539	0.194227	0.19565	0.196866	0.197917	0.198832	0.199637	0.20035	0.200984	0.201551	0.202061	0.202522	0.20294	0.20332	0.203667	0.203985	0.204276	0.204545	0.204792	0.20502	0.205232	0.205429	0.205611	0.205781
																				0.170285	0.177893	0.182813	0.186434	0.189246	0.191504	0.193359	0.194912	0.19623	0.197363	0.198347	0.199207	0.199967	0.200641	0.201243	0.201783	0.202269	0.20271	0.20311	0.203475	0.203808	0.204114	0.204395	0.204653	0.204892	0.205113	0.205318	0.205509	0.205686	0.205851
																				0.174008	0.180481	0.184745	0.187935	0.190445	0.192482	0.194171	0.195595	0.196813	0.197865	0.198783	0.199589	0.200303	0.200939	0.201509	0.202021	0.202484	0.202904	0.203286	0.203635	0.203955	0.204248	0.204518	0.204767	0.204998	0.205211	0.205409	0.205593	0.205764	0.205924
																				0.177332	0.182859	0.186556	0.189363	0.1916	0.193434	0.194969	0.196272	0.197394	0.198368	0.199222	0.199975	0.200645	0.201244	0.201781	0.202266	0.202705	0.203104	0.203468	0.203801	0.204107	0.204388	0.204647	0.204886	0.205108	0.205313	0.205504	0.205681	0.205847	0.206001
																				0.180273	0.185026	0.188241	0.190714	0.192706	0.194356	0.195747	0.196938	0.197968	0.198868	0.19966	0.200363	0.200989	0.201551	0.202057	0.202515	0.20293	0.203309	0.203655	0.203972	0.204264	0.204532	0.20478	0.205009	0.205221	0.205419	0.205602	0.205773	0.205932	0.206081
																				0.182872	0.186993	0.189802	0.191984	0.19376	0.195242	0.196502	0.197588	0.198533	0.199362	0.200096	0.20075	0.201334	0.20186	0.202336	0.202767	0.203159	0.203517	0.203845	0.204146	0.204424	0.20468	0.204916	0.205135	0.205339	0.205528	0.205704	0.205868	0.206021	0.206164
																				0.185175	0.188775	0.191242	0.193174	0.194758	0.196091	0.197231	0.19822	0.199085	0.199849	0.200527	0.201133	0.201678	0.20217	0.202615	0.20302	0.203389	0.203728	0.204038	0.204323	0.204587	0.20483	0.205055	0.205265	0.205459	0.20564	0.205808	0.205965	0.206113	0.20625
																				0.187227	0.190394	0.19257	0.194285	0.195701	0.196899	0.197932	0.198831	0.199623	0.200325	0.200951	0.201512	0.202019	0.202477	0.202894	0.203273	0.203621	0.203939	0.204232	0.204503	0.204752	0.204983	0.205197	0.205396	0.205581	0.205754	0.205915	0.206065	0.206206	0.206338
																				0.189065	0.191866	0.193795	0.195321	0.196589	0.197668	0.198603	0.199421	0.200145	0.200789	0.201366	0.201885	0.202355	0.202782	0.203171	0.203526	0.203852	0.204152	0.204428	0.204683	0.204919	0.205137	0.205341	0.20553	0.205706	0.20587	0.206024	0.206167	0.206302	0.206428
																				0.190719	0.19321	0.194925	0.196288	0.197425	0.198397	0.199244	0.199988	0.200649	0.20124	0.201771	0.202251	0.202686	0.203083	0.203445	0.203777	0.204083	0.204364	0.204623	0.204864	0.205086	0.205293	0.205485	0.205665	0.205832	0.205988	0.206134	0.206271	0.206399	0.20652
																				0.192214	0.194438	0.195969	0.197189	0.19821	0.199088	0.199854	0.200532	0.201135	0.201677	0.202165	0.202608	0.203011	0.203379	0.203716	0.204026	0.204311	0.204575	0.204818	0.205044	0.205254	0.205449	0.205631	0.2058	0.205959	0.206107	0.206246	0.206376	0.206498	0.206613
																				0.19357	0.195564	0.196935	0.198029	0.198948	0.199741	0.200436	0.201052	0.201603	0.202099	0.202548	0.202956	0.203329	0.20367	0.203983	0.204271	0.204538	0.204784	0.205012	0.205224	0.205421	0.205605	0.205776	0.205937	0.206086	0.206227	0.206358	0.206482	0.206598	0.206707
																				0.194804	0.196598	0.197829	0.198813	0.199642	0.200358	0.200988	0.201549	0.202052	0.202506	0.202918	0.203294	0.203638	0.203954	0.204245	0.204513	0.204761	0.204991	0.205204	0.205403	0.205588	0.205761	0.205922	0.206073	0.206214	0.206347	0.206471	0.206588	0.206698	0.206802
																				0.195929	0.197549	0.198658	0.199544	0.200293	0.200941	0.201513	0.202023	0.202482	0.202898	0.203276	0.203622	0.20394	0.204231	0.204501	0.20475	0.204981	0.205195	0.205394	0.20558	0.205754	0.205916	0.206067	0.206209	0.206342	0.206467	0.206585	0.206695	0.206799	0.206898
																				0.196959	0.198426	0.199426	0.200227	0.200904	0.201492	0.202011	0.202476	0.202895	0.203275	0.203622	0.20394	0.204232	0.204502	0.204751	0.204982	0.205196	0.205396	0.205582	0.205755	0.205917	0.206069	0.206211	0.206345	0.20647	0.206587	0.206698	0.206802	0.206901	0.206993
																				0.197902	0.199235	0.200141	0.200865	0.201478	0.202011	0.202483	0.202906	0.203289	0.203637	0.203955	0.204247	0.204516	0.204765	0.204995	0.205209	0.205408	0.205593	0.205766	0.205928	0.206079	0.206221	0.206354	0.206479	0.206597	0.206707	0.206811	0.206909	0.207002	0.207089
																				0.19877	0.199983	0.200805	0.201462	0.202017	0.202501	0.202931	0.203316	0.203665	0.203983	0.204275	0.204543	0.204791	0.20502	0.205233	0.20543	0.205615	0.205787	0.205947	0.206098	0.206239	0.206371	0.206496	0.206612	0.206723	0.206826	0.206924	0.207016	0.207103	0.207185
																				0.199568	0.200676	0.201423	0.20202	0.202524	0.202964	0.203355	0.203706	0.204025	0.204315	0.204583	0.204829	0.205056	0.205267	0.205463	0.205646	0.205817	0.205976	0.206125	0.206265	0.206396	0.206519	0.206635	0.206744	0.206847	0.206944	0.207036	0.207122	0.207204	0.207281
																				0.200305	0.201319	0.201999	0.202542	0.203001	0.203401	0.203757	0.204077	0.204368	0.204633	0.204878	0.205104	0.205313	0.205507	0.205687	0.205856	0.206013	0.206161	0.206299	0.206429	0.206551	0.206665	0.206773	0.206875	0.20697	0.207061	0.207146	0.207227	0.207304	0.207376
																				0.200986	0.201916	0.202537	0.203031	0.203449	0.203813	0.204137	0.204429	0.204695	0.204938	0.205161	0.205368	0.20556	0.205738	0.205905	0.20606	0.206205	0.206341	0.206469	0.206589	0.206702	0.206808	0.206908	0.207003	0.207092	0.207176	0.207256	0.207332	0.207403	0.20747
																				0.201617	0.202471	0.203039	0.20349	0.203871	0.204203	0.204498	0.204764	0.205006	0.205229	0.205433	0.205623	0.205798	0.205962	0.206115	0.206258	0.206391	0.206517	0.206635	0.206746	0.20685	0.206949	0.207042	0.207129	0.207212	0.20729	0.207364	0.207435	0.207501	0.207564
																				0.202202	0.202988	0.203508	0.20392	0.204268	0.20457	0.20484	0.205083	0.205304	0.205507	0.205694	0.205867	0.206028	0.206178	0.206318	0.206449	0.206572	0.206688	0.206797	0.206899	0.206995	0.207086	0.207172	0.207253	0.20733	0.207403	0.207471	0.207537	0.207598	0.207657
																				0.202746	0.203471	0.203947	0.204324	0.204641	0.204918	0.205163	0.205385	0.205587	0.205772	0.205943	0.206101	0.206249	0.206386	0.206515	0.206635	0.206748	0.206854	0.206954	0.207048	0.207137	0.207221	0.2073	0.207375	0.207446	0.207513	0.207577	0.207637	0.207694	0.207749
																				0.203252	0.203921	0.204359	0.204704	0.204994	0.205246	0.20547	0.205673	0.205857	0.206026	0.206182	0.206327	0.206461	0.206587	0.206704	0.206815	0.206918	0.207016	0.207107	0.207194	0.207275	0.207353	0.207425	0.207494	0.20756	0.207622	0.20768	0.207736	0.207789	0.207839
																				0.203723	0.204342	0.204745	0.205061	0.205326	0.205557	0.205761	0.205946	0.206114	0.206268	0.20641	0.206542	0.206665	0.20678	0.206888	0.206988	0.207083	0.207172	0.207256	0.207335	0.20741	0.207481	0.207548	0.207611	0.207671	0.207728	0.207782	0.207833	0.207882	0.207928
																				0.204163	0.204736	0.205107	0.205397	0.20564	0.20585	0.206037	0.206206	0.206359	0.206499	0.206629	0.206749	0.206862	0.206966	0.207064	0.207156	0.207243	0.207324	0.207401	0.207473	0.207542	0.207606	0.207667	0.207725	0.20778	0.207832	0.207882	0.207929	0.207973	0.208016
																				0.204574	0.205105	0.205447	0.205713	0.205936	0.206128	0.206299	0.206452	0.206592	0.20672	0.206838	0.206948	0.20705	0.207145	0.207234	0.207318	0.207397	0.207471	0.207541	0.207607	0.207669	0.207728	0.207784	0.207837	0.207887	0.207935	0.20798	0.208023	0.208063	0.208102
																				0.204959	0.205451	0.205766	0.206011	0.206215	0.206391	0.206547	0.206687	0.206814	0.206931	0.207038	0.207138	0.207231	0.207317	0.207398	0.207475	0.207546	0.207613	0.207677	0.207737	0.207793	0.207847	0.207898	0.207946	0.207991	0.208035	0.208076	0.208115	0.208152	0.208187
																				0.205319	0.205776	0.206067	0.206292	0.206479	0.206641	0.206783	0.20691	0.207026	0.207132	0.20723	0.20732	0.207404	0.207483	0.207556	0.207625	0.20769	0.207751	0.207808	0.207863	0.207914	0.207962	0.208008	0.208052	0.208093	0.208132	0.208169	0.208205	0.208238	0.20827
																				0.205656	0.206082	0.206351	0.206558	0.206729	0.206877	0.207006	0.207122	0.207228	0.207324	0.207413	0.207495	0.207571	0.207642	0.207708	0.207771	0.207829	0.207884	0.207936	0.207985	0.208031	0.208075	0.208116	0.208155	0.208192	0.208228	0.208261	0.208293	0.208323	0.208351
																				0.205973	0.206369	0.206617	0.206808	0.206965	0.2071	0.207219	0.207324	0.20742	0.207507	0.207587	0.207662	0.20773	0.207795	0.207854	0.20791	0.207963	0.208013	0.208059	0.208103	0.208145	0.208184	0.208221	0.208256	0.208289	0.20832	0.20835	0.208379	0.208406	0.208431
																				0.206271	0.206639	0.206869	0.207045	0.207189	0.207312	0.20742	0.207516	0.207603	0.207682	0.207755	0.207822	0.207884	0.207941	0.207995	0.208045	0.208092	0.208137	0.208178	0.208218	0.208254	0.208289	0.208322	0.208354	0.208383	0.208411	0.208437	0.208463	0.208486	0.208509
																				0.206551	0.206894	0.207107	0.207268	0.207401	0.207513	0.207612	0.207699	0.207778	0.207849	0.207915	0.207975	0.20803	0.208082	0.20813	0.208175	0.208217	0.208256	0.208293	0.208328	0.208361	0.208392	0.208421	0.208448	0.208474	0.208499	0.208522	0.208544	0.208565	0.208585
																				0.206814	0.207134	0.207331	0.20748	0.207601	0.207704	0.207794	0.207873	0.207944	0.208009	0.208067	0.208121	0.208171	0.208217	0.20826	0.2083	0.208337	0.208372	0.208405	0.208435	0.208464	0.208491	0.208517	0.208541	0.208563	0.208585	0.208605	0.208624	0.208642	0.20866
																				0.207062	0.20736	0.207543	0.20768	0.207792	0.207886	0.207967	0.208039	0.208103	0.208161	0.208213	0.208262	0.208306	0.208347	0.208385	0.20842	0.208453	0.208483	0.208512	0.208539	0.208564	0.208587	0.208609	0.20863	0.20865	0.208668	0.208686	0.208702	0.208717	0.208732
																				0.207296	0.207574	0.207743	0.20787	0.207972	0.208058	0.208131	0.208196	0.208254	0.208306	0.208353	0.208396	0.208435	0.208471	0.208505	0.208535	0.208564	0.208591	0.208615	0.208639	0.20866	0.20868	0.208699	0.208717	0.208733	0.208749	0.208764	0.208777	0.20879	0.208803
																				0.207517	0.207776	0.207933	0.208049	0.208143	0.208221	0.208288	0.208346	0.208398	0.208445	0.208486	0.208524	0.208559	0.208591	0.20862	0.208647	0.208671	0.208694	0.208715	0.208735	0.208753	0.20877	0.208786	0.208801	0.208815	0.208828	0.20884	0.208851	0.208861	0.208871
																				0.207725	0.207967	0.208112	0.20822	0.208305	0.208376	0.208437	0.208489	0.208536	0.208577	0.208614	0.208647	0.208678	0.208705	0.20873	0.208753	0.208774	0.208794	0.208811	0.208828	0.208843	0.208857	0.20887	0.208882	0.208893	0.208904	0.208913	0.208922	0.20893	0.208938
																				0.207922	0.208148	0.208282	0.208381	0.208459	0.208524	0.208578	0.208626	0.208667	0.208703	0.208736	0.208765	0.208791	0.208815	0.208836	0.208856	0.208873	0.208889	0.208904	0.208918	0.20893	0.208941	0.208951	0.208961	0.208969	0.208977	0.208985	0.208991	0.208998	0.209003
																				0.208108	0.208319	0.208443	0.208534	0.208606	0.208664	0.208713	0.208755	0.208792	0.208824	0.208852	0.208878	0.2089	0.20892	0.208938	0.208954	0.208969	0.208982	0.208993	0.209004	0.209014	0.209022	0.20903	0.209037	0.209043	0.209049	0.209054	0.209058	0.209063	0.209066
																				0.208284	0.208481	0.208596	0.20868	0.208745	0.208798	0.208842	0.208879	0.208911	0.208939	0.208964	0.208985	0.209004	0.209021	0.209036	0.209049	0.20906	0.20907	0.209079	0.209087	0.209094	0.2091	0.209106	0.20911	0.209114	0.209118	0.209121	0.209123	0.209126	0.209127
																				0.208451	0.208634	0.208741	0.208817	0.208877	0.208924	0.208964	0.208997	0.209025	0.209049	0.20907	0.209088	0.209104	0.209117	0.209129	0.209139	0.209148	0.209155	0.209162	0.209167	0.209172	0.209176	0.209179	0.209181	0.209183	0.209185	0.209186	0.209186	0.209187	0.209187
																				0.208608	0.20878	0.208878	0.208949	0.209002	0.209045	0.20908	0.209109	0.209134	0.209154	0.209172	0.209187	0.209199	0.20921	0.209219	0.209226	0.209232	0.209237	0.209241	0.209244	0.209247	0.209248	0.209249	0.20925	0.209249	0.209249	0.209248	0.209247	0.209246	0.209244
																				0.208758	0.208918	0.209009	0.209073	0.209122	0.20916	0.209191	0.209216	0.209237	0.209255	0.209269	0.209281	0.20929	0.209298	0.209305	0.209309	0.209313	0.209316	0.209317	0.209318	0.209318	0.209318	0.209317	0.209315	0.209313	0.209311	0.209309	0.209306	0.209303	0.209299
																				0.2089	0.209049	0.209133	0.209191	0.209235	0.209269	0.209297	0.209318	0.209336	0.20935	0.209362	0.209371	0.209378	0.209383	0.209387	0.209389	0.209391	0.209391	0.209391	0.209389	0.209388	0.209385	0.209382	0.209379	0.209375	0.209371	0.209367	0.209362	0.209358	0.209353
																				0.209034	0.209173	0.20925	0.209304	0.209343	0.209374	0.209397	0.209416	0.20943	0.209442	0.20945	0.209457	0.209461	0.209464	0.209465	0.209466	0.209465	0.209463	0.209461	0.209458	0.209454	0.20945	0.209445	0.20944	0.209434	0.209429	0.209423	0.209417	0.209411	0.209404
																				0.209162	0.209291	0.209362	0.209411	0.209446	0.209473	0.209493	0.209508	0.20952	0.209529	0.209535	0.209539	0.209541	0.209541	0.209541	0.209539	0.209536	0.209533	0.209528	0.209523	0.209518	0.209512	0.209505	0.209498	0.209491	0.209484	0.209477	0.209469	0.209462	0.209454
																				0.209283	0.209403	0.209468	0.209512	0.209544	0.209567	0.209584	0.209597	0.209606	0.209612	0.209615	0.209617	0.209617	0.209615	0.209613	0.209609	0.209604	0.209599	0.209593	0.209586	0.209579	0.209571	0.209563	0.209555	0.209546	0.209538	0.209529	0.20952	0.209511	0.209502
																				0.209398	0.20951	0.209569	0.209609	0.209637	0.209657	0.209671	0.209681	0.209687	0.209691	0.209692	0.209692	0.20969	0.209686	0.209682	0.209676	0.209669	0.209662	0.209654	0.209646	0.209637	0.209628	0.209618	0.209609	0.209599	0.209589	0.209578	0.209568	0.209558	0.209548
																				0.209507	0.209611	0.209665	0.209701	0.209725	0.209742	0.209753	0.209761	0.209765	0.209766	0.209766	0.209763	0.209759	0.209754	0.209747	0.20974	0.209732	0.209723	0.209713	0.209703	0.209693	0.209682	0.209671	0.20966	0.209649	0.209638	0.209626	0.209615	0.209603	0.209592
																				0.209611	0.209707	0.209757	0.209788	0.209809	0.209823	0.209832	0.209837	0.209839	0.209838	0.209835	0.209831	0.209825	0.209818	0.20981	0.209801	0.209791	0.20978	0.20977	0.209758	0.209746	0.209734	0.209722	0.20971	0.209697	0.209684	0.209672	0.209659	0.209646	0.209634
																				0.209709	0.209798	0.209844	0.209871	0.209889	0.209901	0.209907	0.20991	0.209909	0.209907	0.209902	0.209896	0.209888	0.209879	0.209869	0.209859	0.209847	0.209836	0.209823	0.20981	0.209797	0.209784	0.20977	0.209757	0.209743	0.209729	0.209715	0.209701	0.209688	0.209674
																				0.209803	0.209885	0.209926	0.20995	0.209965	0.209974	0.209978	0.209978	0.209976	0.209972	0.209965	0.209957	0.209948	0.209937	0.209926	0.209914	0.209901	0.209888	0.209874	0.20986	0.209846	0.209831	0.209816	0.209801	0.209786	0.209771	0.209756	0.209742	0.209727	0.209712
																				0.209892	0.209968	0.210004	0.210026	0.210038	0.210044	0.210046	0.210044	0.21004	0.210033	0.210025	0.210015	0.210005	0.209993	0.20998	0.209966	0.209952	0.209938	0.209923	0.209907	0.209892	0.209876	0.20986	0.209844	0.209828	0.209812	0.209796	0.20978	0.209764	0.209748
																				0.209977	0.210046	0.210079	0.210097	0.210106	0.21011	0.21011	0.210106	0.2101	0.210092	0.210082	0.210071	0.210058	0.210045	0.210031	0.210016	0.210001	0.209985	0.209968	0.209952	0.209935	0.209918	0.209901	0.209884	0.209867	0.20985	0.209833	0.209816	0.209799	0.209783
																				0.210058	0.210121	0.21015	0.210165	0.210172	0.210173	0.210171	0.210165	0.210157	0.210147	0.210136	0.210123	0.210109	0.210095	0.210079	0.210063	0.210046	0.210029	0.210012	0.209994	0.209976	0.209958	0.20994	0.209922	0.209904	0.209886	0.209868	0.20985	0.209832	0.209815
																				0.210134	0.210192	0.210217	0.210229	0.210233	0.210233	0.210228	0.210221	0.210211	0.2102	0.210187	0.210173	0.210157	0.210141	0.210125	0.210107	0.210089	0.210071	0.210052	0.210034	0.210015	0.209996	0.209977	0.209957	0.209938	0.209919	0.2099	0.209882	0.209863	0.209845
																				0.210207	0.210259	0.210281	0.21029	0.210292	0.210289	0.210283	0.210274	0.210262	0.210249	0.210235	0.210219	0.210203	0.210185	0.210167	0.210149	0.21013	0.21011	0.210091	0.210071	0.210051	0.210031	0.210011	0.209991	0.209971	0.209951	0.209931	0.209911	0.209892	0.209873
																				0.210276	0.210323	0.210341	0.210347	0.210347	0.210342	0.210334	0.210323	0.21031	0.210296	0.21028	0.210263	0.210245	0.210226	0.210207	0.210187	0.210167	0.210147	0.210126	0.210105	0.210084	0.210063	0.210042	0.210021	0.21	0.209979	0.209959	0.209938	0.209918	0.209898
																				0.210342	0.210384	0.210398	0.210402	0.210399	0.210392	0.210382	0.21037	0.210355	0.210339	0.210322	0.210304	0.210284	0.210265	0.210244	0.210223	0.210202	0.210181	0.210159	0.210137	0.210115	0.210093	0.210071	0.210049	0.210027	0.210006	0.209984	0.209963	0.209942	0.209921
																				0.210405	0.210441	0.210452	0.210453	0.210448	0.210439	0.210427	0.210413	0.210397	0.210379	0.210361	0.210341	0.210321	0.2103	0.210278	0.210256	0.210234	0.210211	0.210189	0.210166	0.210143	0.21012	0.210097	0.210074	0.210052	0.210029	0.210007	0.209985	0.209963	0.209941
																				0.210464	0.210495	0.210503	0.210501	0.210494	0.210483	0.210469	0.210453	0.210436	0.210417	0.210397	0.210376	0.210354	0.210332	0.210309	0.210286	0.210263	0.210239	0.210216	0.210192	0.210168	0.210144	0.21012	0.210097	0.210073	0.21005	0.210027	0.210004	0.209981	0.209959
																				0.21052	0.210546	0.21055	0.210546	0.210536	0.210523	0.210508	0.21049	0.210471	0.210451	0.210429	0.210407	0.210384	0.210361	0.210337	0.210313	0.210288	0.210264	0.210239	0.210214	0.210189	0.210165	0.21014	0.210116	0.210091	0.210067	0.210043	0.210019	0.209996	0.209973
																				0.210573	0.210594	0.210595	0.210588	0.210576	0.21056	0.210543	0.210524	0.210503	0.210481	0.210458	0.210435	0.21041	0.210386	0.210361	0.210336	0.21031	0.210284	0.210259	0.210233	0.210207	0.210182	0.210156	0.210131	0.210105	0.21008	0.210055	0.210031	0.210006	0.209982
																				0.210622	0.210638	0.210636	0.210625	0.210611	0.210594	0.210574	0.210553	0.210531	0.210507	0.210483	0.210458	0.210433	0.210407	0.21038	0.210354	0.210327	0.210301	0.210274	0.210247	0.21022	0.210194	0.210167	0.210141	0.210115	0.210089	0.210063	0.210037	0.210012	0.209987
																				0.210669	0.210679	0.210672	0.210659	0.210642	0.210622	0.210601	0.210578	0.210554	0.210529	0.210503	0.210476	0.21045	0.210422	0.210395	0.210367	0.210339	0.210312	0.210284	0.210256	0.210228	0.2102	0.210173	0.210145	0.210118	0.210091	0.210064	0.210038	0.210012	0.209986
																				0.210711	0.210715	0.210705	0.210688	0.210668	0.210646	0.210622	0.210597	0.21057	0.210544	0.210516	0.210488	0.21046	0.210431	0.210402	0.210373	0.210344	0.210315	0.210286	0.210257	0.210228	0.210199	0.21017	0.210141	0.210113	0.210085	0.210057	0.210029	0.210002	0.209975
																				0.210749	0.210746	0.21073	0.210709	0.210686	0.210661	0.210634	0.210606	0.210578	0.210549	0.210519	0.21049	0.210459	0.210429	0.210398	0.210368	0.210337	0.210306	0.210275	0.210245	0.210214	0.210184	0.210153	0.210123	0.210094	0.210064	0.210035	0.210006	0.209977	0.209949
																				0.210778	0.210764	0.210741	0.210715	0.210686	0.210657	0.210627	0.210596	0.210564	0.210532	0.2105	0.210467	0.210434	0.210401	0.210368	0.210335	0.210301	0.210268	0.210235	0.210202	0.210169	0.210136	0.210104	0.210071	0.210039	0.210008	0.209976	0.209945	0.209914	0.209884
[truncated: 131 more columns]
